# Supplementary material for: Cell-Based Screening Identifies Paroxetine as an Inhibitor of Diabetic Endothelial Dysfunction
Source: PubMed Central journal article supplement — Diabetes. 2013 Feb 14;62(3):953–64. doi: 10.2337/db12-0789 (PMC3581231; doi:10.2337/db12-0789), 2013-02-14
Supplement: supp_db12-0789_DB120789SupplementaryData.pdf [file supp_db12-0789_DB120789SupplementaryData.pdf]

SUPPLEMENTARY DATA

**Supplementary Figure 1.** Effect of mevastatin on mitochondrial ROS production and viability in endothelial cells. In the primary screens mevastatin proved to be the least toxic statin in bEND.3 cells. bEND.3 endothelial cells were exposed to hyperglycemia for 10 days with 3 -day-long mevastatin treatment at the indicated concentrations. Mitochondrial ROS production and viability was measured with MitoSOX Red and Hoechst 33342, and are expressed as percent values compared to normoglycemic control cells (low). Mevastatin decreased the mitochondrial ROS generation with simultaneous viability reduction. (#p<0.05 compared to normoglycemic control, \*p<0.05 compared to hyperglycemic cells).

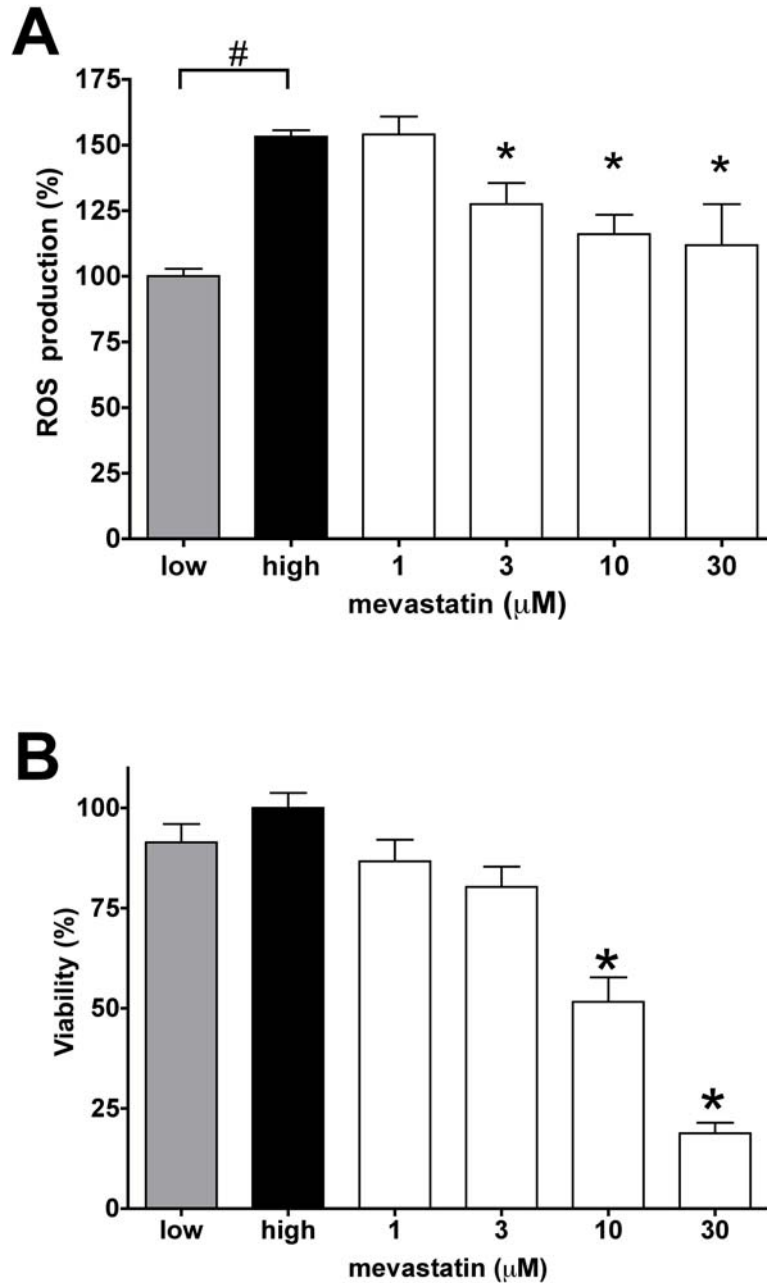

SUPPLEMENTARY DATA

**Supplementary Figure 2.** Mitochondrial energy production-related gene expression changes induced by paroxetine. Gene expression changes were analyzed with mitochondrial energy array in bEND.3 cells exposed to hyperglycemia for 7 days and treated with paroxetine (10  $\mu$ M) or vehicle for 3 days. The gene symbols and relative expression (fold change) in paroxetine treated cells compared to vehicle-treated cells are shown. Background color represents the relative expression level on a color scale (shown on the right). The list of full gene names, Genbank accession number and statistical analysis results can be found in Supplementary Tables 1 and 2.

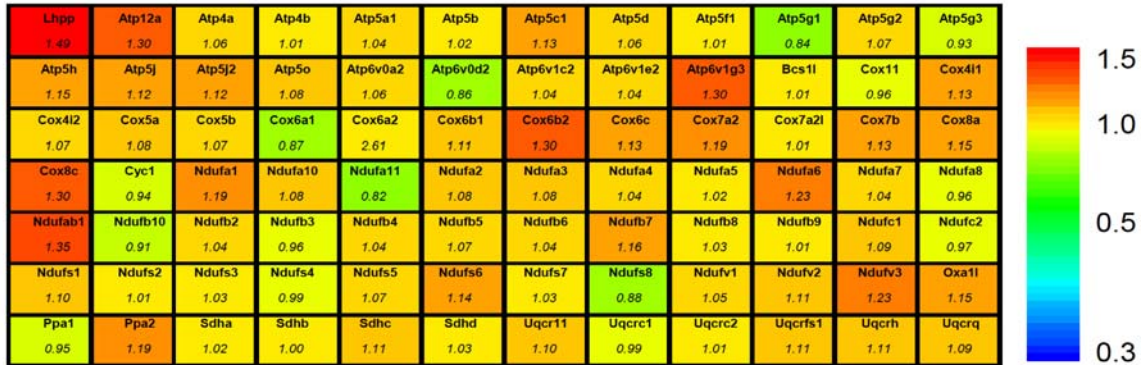

## SUPPLEMENTARY DATA

**Supplementary Figure 3.** Effect of paroxetine on mitochondrial function in isolated hepatic mitochondria. Rat liver mitochondria were isolated as described in the methods section. Mitochondria were resuspended in mitochondrial assay solution (MAS, 1X) that comprises 70 mM sucrose, 220 mM mannitol, 10 mM KH<sub>2</sub>PO<sub>4</sub>, 5 mM MgCl<sub>2</sub>, 2 mM HEPES, 1 mM EGTA and 0.2% (w/v) fatty acid-free BSA, pH 7.2 at 37 °C. Mitochondria (10 µg protein/well) were placed on Seahorse assay plates, centrifuged to let them attach to the bottom and substrate (succinate) was added. **A:** Paroxetine (PRX, 3 or 10 µM) or vehicle was injected and basal respiration was measured. Phosphorylating respiration was measured following the addition of ADP (4 mM). ATP synthesis-linked oxygen consumption was blocked with oligomycin (2.5 µg/ml) and maximal uncoupler-stimulated respiration was measured following the injection of FCCP (4 µM). **B:** The ATP synthesis-linked oxygen consumption rates were measured in the presence of ADP and substrate. No significant differences were found. Paroxetine does not inhibit mitochondrial ATP generation in the tested concentrations.

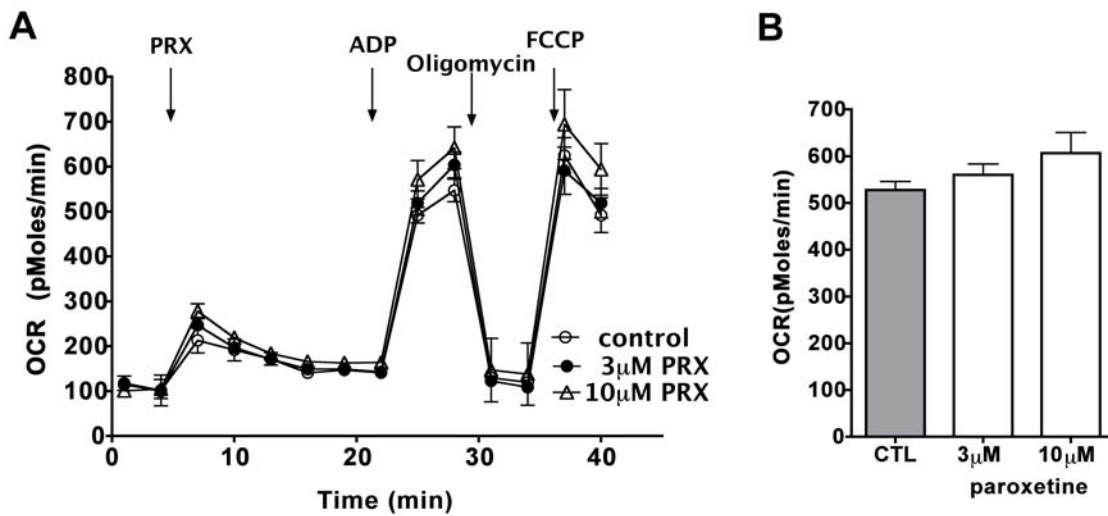

SUPPLEMENTARY DATA

**Supplementary Figure 4.** Effect of partial and complete degradation of paroxetine by UV light on its ability to attenuate ROS production in hyperglycemic endothelial cells. 1mM aqueous solution of paroxetine was exposed to UV light (254nm). Paroxetine degradation was monitored with spectrophotometric analysis of the solution. The mitochondrial ROS production inhibitory potential of intact paroxetine (A), partially (~50% degraded, B) and completely decomposed paroxetine (C) was tested in bEND.3 cells. Endothelial cells were exposed to hyperglycemia for 10 days with 3 -day-long compound treatment at the indicated concentration. Mitochondrial ROS production and viability was measured with MitoSOX Red and Hoechst 33342, and are expressed as percent values compared to normoglycemic control cells (low). (#p<0.05 compared to normoglycemic control, \*p<0.05 compared to hyperglycemic cells).

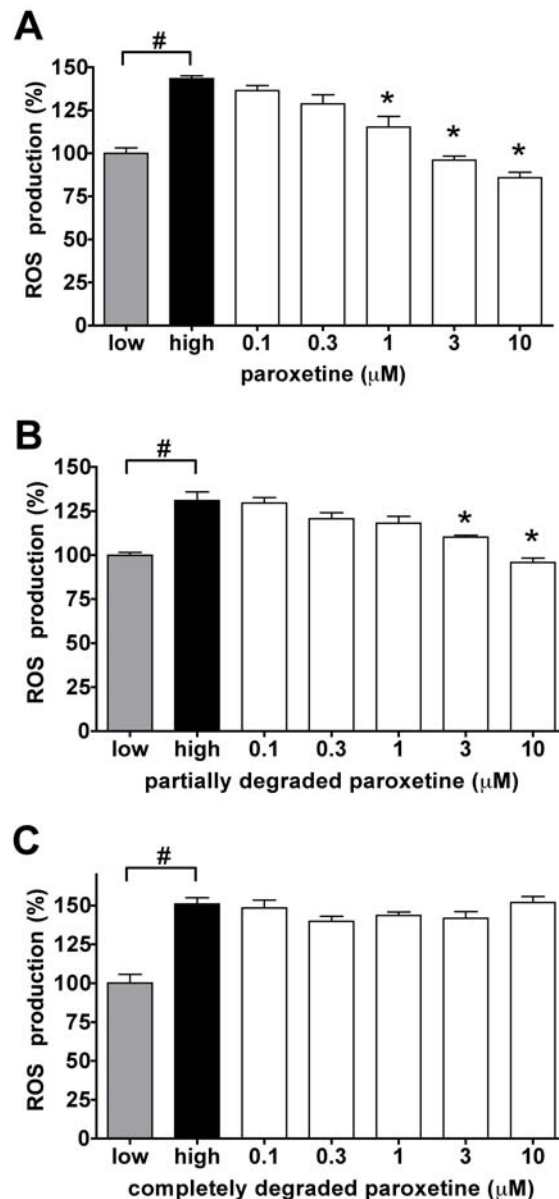



SUPPLEMENTARY DATA

**Supplementary Table 1.** List of genes analyzed by the mouse mitochondrial energy metabolism PCR array. The genes associated with mitochondrial energy production are listed with their gene symbol, full gene name, UniGene identifier and NCBI accession number and respective position on the plate.

| Position | UniGene   | RefSeq       | Gene Symbol | Description                                                                                 |
|----------|-----------|--------------|-------------|---------------------------------------------------------------------------------------------|
| A01      | Mm.276721 | NM_029609    | Lhpp        | Phospholysine phosphohistidine inorganic pyrophosphate phosphatase                          |
| A02      | Mm.273271 | NM_138652    | Atp12a      | ATPase, H <sup>+</sup> /K <sup>+</sup> transporting, nongastric, alpha polypeptide          |
| A03      | Mm.12821  | NM_018731    | Atp4a       | ATPase, H <sup>+</sup> /K <sup>+</sup> exchanging, gastric, alpha polypeptide               |
| A04      | Mm.154039 | NM_009724    | Atp4b       | ATPase, H <sup>+</sup> /K <sup>+</sup> exchanging, beta polypeptide                         |
| A05      | Mm.276137 | NM_007505    | Atp5a1      | ATP synthase, H <sup>+</sup> transporting, mitochondrial F1 complex, alpha subunit 1        |
| A06      | Mm.238973 | NM_016774    | Atp5b       | ATP synthase, H <sup>+</sup> transporting mitochondrial F1 complex, beta subunit            |
| A07      | Mm.12677  | NM_020615    | Atp5c1      | ATP synthase, H <sup>+</sup> transporting, mitochondrial F1 complex, gamma polypeptide 1    |
| A08      | Mm.278560 | NM_025313    | Atp5d       | ATP synthase, H <sup>+</sup> transporting, mitochondrial F1 complex, delta subunit          |
| A09      | Mm.251152 | NM_009725    | Atp5f1      | ATP synthase, H <sup>+</sup> transporting, mitochondrial F0 complex, subunit B1             |
| A10      | Mm.371547 | NM_007506    | Atp5g1      | ATP synthase, H <sup>+</sup> transporting, mitochondrial F0 complex, subunit c1 (subunit 9) |
| A11      | Mm.10314  | NM_026468    | Atp5g2      | ATP synthase, H <sup>+</sup> transporting, mitochondrial F0 complex, subunit C2 (subunit 9) |
| A12      | Mm.2966   | NM_175015    | Atp5g3      | ATP synthase, H <sup>+</sup> transporting, mitochondrial F0 complex, subunit C3 (subunit 9) |
| B01      | Mm.371641 | NM_027862    | Atp5h       | ATP synthase, H <sup>+</sup> transporting, mitochondrial F0 complex, subunit d              |
| B02      | Mm.353    | NM_016755    | Atp5j       | ATP synthase, H <sup>+</sup> transporting, mitochondrial F0 complex, subunit F              |
| B03      | Mm.133551 | NM_020582    | Atp5j2      | ATP synthase, H <sup>+</sup> transporting, mitochondrial F0 complex, subunit F2             |
| B04      | Mm.41     | NM_138597    | Atp5o       | ATP synthase, H <sup>+</sup> transporting, mitochondrial F1 complex, O subunit              |
| B05      | Mm.1158   | NM_011596    | Atp6v0a2    | ATPase, H <sup>+</sup> transporting, lysosomal V0 subunit A2                                |
| B06      | Mm.19298  | NM_175406    | Atp6v0d2    | ATPase, H <sup>+</sup> transporting, lysosomal V0 subunit D2                                |
| B07      | Mm.178798 | NM_133699    | Atp6v1c2    | ATPase, H <sup>+</sup> transporting, lysosomal V1 subunit C2                                |
| B08      | Mm.159369 | NM_029121    | Atp6v1e2    | ATPase, H <sup>+</sup> transporting, lysosomal V1 subunit E2                                |
| B09      | Mm.114424 | NM_177397    | Atp6v1g3    | ATPase, H <sup>+</sup> transporting, lysosomal V1 subunit G3                                |
| B10      | Mm.358700 | NM_025784    | Bcs1l       | BCS1-like (yeast)                                                                           |
| B11      | Mm.151940 | NM_199008    | Cox11       | COX11 homolog, cytochrome c oxidase assembly protein (yeast)                                |
| B12      | Mm.386758 | NM_009941    | Cox4i1      | Cytochrome c oxidase subunit IV isoform 1                                                   |
| C01      | Mm.196668 | NM_053091    | Cox4i2      | Cytochrome c oxidase subunit IV isoform 2                                                   |
| C02      | Mm.273403 | NM_007747    | Cox5a       | Cytochrome c oxidase, subunit Va                                                            |
| C03      | Mm.180182 | NM_009942    | Cox5b       | Cytochrome c oxidase, subunit Vb                                                            |
| C04      | Mm.43415  | NM_007748    | Cox6a1      | Cytochrome c oxidase, subunit VI a, polypeptide 1                                           |
| C05      | Mm.43824  | NM_009943    | Cox6a2      | Cytochrome c oxidase, subunit VI a, polypeptide 2                                           |
| C06      | Mm.400    | NM_025628    | Cox6b1      | Cytochrome c oxidase, subunit VI b polypeptide 1                                            |
| C07      | Mm.29625  | NM_183405    | Cox6b2      | Cytochrome c oxidase subunit VI b polypeptide 2                                             |
| C08      | Mm.548    | NM_053071    | Cox6c       | Cytochrome c oxidase, subunit VIc                                                           |
| C09      | Mm.152627 | NM_009945    | Cox7a2      | Cytochrome c oxidase, subunit VIIa 2                                                        |
| C10      | Mm.30072  | NM_009187    | Cox7a2l     | Cytochrome c oxidase subunit VIIa polypeptide 2-like                                        |
| C11      | Mm.197728 | NM_025379    | Cox7b       | Cytochrome c oxidase subunit VIIb                                                           |
| C12      | Mm.14022  | NM_007750    | Cox8a       | Cytochrome c oxidase, subunit VIIa                                                          |
| D01      | Mm.660    | NM_001039049 | Cox8c       | Cytochrome c oxidase, subunit VIIc                                                          |
| D02      | Mm.29196  | NM_025567    | Cyc1        | Cytochrome c-1                                                                              |
| D03      | Mm.34869  | NM_019443    | Ndufa1      | NADH dehydrogenase (ubiquinone) 1 alpha subcomplex, 1                                       |
| D04      | Mm.248778 | NM_024197    | Ndufa10     | NADH dehydrogenase (ubiquinone) 1 alpha subcomplex 10                                       |
| D05      | Mm.279823 | NM_027244    | Ndufa11     | NADH dehydrogenase (ubiquinone) 1 alpha subcomplex 11                                       |
| D06      | Mm.29867  | NM_010885    | Ndufa2      | NADH dehydrogenase (ubiquinone) 1 alpha subcomplex, 2                                       |
| D07      | Mm.17851  | NM_025348    | Ndufa3      | NADH dehydrogenase (ubiquinone) 1 alpha subcomplex, 3                                       |
| D08      | Mm.415865 | NM_010886    | Ndufa4      | NADH dehydrogenase (ubiquinone) 1 alpha subcomplex, 4                                       |
| D09      | Mm.275780 | NM_026614    | Ndufa5      | NADH dehydrogenase (ubiquinone) 1 alpha subcomplex, 5                                       |

SUPPLEMENTARY DATA

| Position | UniGene   | RefSeq       | Gene Symbol | Description                                                           |
|----------|-----------|--------------|-------------|-----------------------------------------------------------------------|
| D10      | Mm.27570  | NM_025987    | Ndufa6      | NADH dehydrogenase (ubiquinone) 1 alpha subcomplex, 6 (B14)           |
| D11      | Mm.29513  | NM_023202    | Ndufa7      | NADH dehydrogenase (ubiquinone) 1 alpha subcomplex, 7 (B14.5a)        |
| D12      | Mm.19834  | NM_026703    | Ndufa8      | NADH dehydrogenase (ubiquinone) 1 alpha subcomplex, 8                 |
| E01      | Mm.347976 | NM_028177    | Ndufab1     | NADH dehydrogenase (ubiquinone) 1, alpha/beta subcomplex, 1           |
| E02      | Mm.1129   | NM_026684    | Ndufb10     | NADH dehydrogenase (ubiquinone) 1 beta subcomplex, 10                 |
| E03      | Mm.29415  | NM_026612    | Ndufb2      | NADH dehydrogenase (ubiquinone) 1 beta subcomplex, 2                  |
| E04      | Mm.2033   | NM_025597    | Ndufb3      | NADH dehydrogenase (ubiquinone) 1 beta subcomplex 3                   |
| E05      | Mm.379154 | NM_026610    | Ndufb4      | NADH dehydrogenase (ubiquinone) 1 beta subcomplex 4                   |
| E06      | Mm.28058  | NM_025316    | Ndufb5      | NADH dehydrogenase (ubiquinone) 1 beta subcomplex, 5                  |
| E07      | Mm.1103   | NM_001033305 | Ndufb6      | NADH dehydrogenase (ubiquinone) 1 beta subcomplex, 6                  |
| E08      | Mm.29683  | NM_025843    | Ndufb7      | NADH dehydrogenase (ubiquinone) 1 beta subcomplex, 7                  |
| E09      | Mm.2060   | NM_026061    | Ndufb8      | NADH dehydrogenase (ubiquinone) 1 beta subcomplex 8                   |
| E10      | Mm.322294 | NM_023172    | Ndufb9      | NADH dehydrogenase (ubiquinone) 1 beta subcomplex, 9                  |
| E11      | Mm.331007 | NM_025523    | Ndufc1      | NADH dehydrogenase (ubiquinone) 1, subcomplex unknown, 1              |
| E12      | Mm.334031 | NM_024220    | Ndufc2      | NADH dehydrogenase (ubiquinone) 1, subcomplex unknown, 2              |
| F01      | Mm.290791 | NM_145518    | Ndufs1      | NADH dehydrogenase (ubiquinone) Fe-S protein 1                        |
| F02      | Mm.21669  | NM_153064    | Ndufs2      | NADH dehydrogenase (ubiquinone) Fe-S protein 2                        |
| F03      | Mm.30113  | NM_026688    | Ndufs3      | NADH dehydrogenase (ubiquinone) Fe-S protein 3                        |
| F04      | Mm.253142 | NM_010887    | Ndufs4      | NADH dehydrogenase (ubiquinone) Fe-S protein 4                        |
| F05      | Mm.42805  | NM_001030274 | Ndufs5      | NADH dehydrogenase (ubiquinone) Fe-S protein 5                        |
| F06      | Mm.29897  | NM_010888    | Ndufs6      | NADH dehydrogenase (ubiquinone) Fe-S protein 6                        |
| F07      | Mm.28712  | NM_029272    | Ndufs7      | NADH dehydrogenase (ubiquinone) Fe-S protein 7                        |
| F08      | Mm.44227  | NM_144870    | Ndufs8      | NADH dehydrogenase (ubiquinone) Fe-S protein 8                        |
| F09      | Mm.29842  | NM_133666    | Ndufv1      | NADH dehydrogenase (ubiquinone) flavoprotein 1                        |
| F10      | Mm.2206   | NM_028388    | Ndufv2      | NADH dehydrogenase (ubiquinone) flavoprotein 2                        |
| F11      | Mm.28349  | NM_030087    | Ndufv3      | NADH dehydrogenase (ubiquinone) flavoprotein 3                        |
| F12      | Mm.182340 | NM_026936    | Oxa1l       | Oxidase assembly 1-like                                               |
| G01      | Mm.28897  | NM_026438    | Ppa1        | Pyrophosphatase (inorganic) 1                                         |
| G02      | Mm.210305 | NM_146141    | Ppa2        | Pyrophosphatase (inorganic) 2                                         |
| G03      | Mm.158231 | NM_023281    | Sdha        | Succinate dehydrogenase complex, subunit A, flavoprotein (Fp)         |
| G04      | Mm.246965 | NM_023374    | Sdha        | Succinate dehydrogenase complex, subunit B, iron sulfur (Ip)          |
| G05      | Mm.198138 | NM_025321    | Sdhc        | Succinate dehydrogenase complex, subunit C, integral membrane protein |
| G06      | Mm.10406  | NM_025848    | Sdhd        | Succinate dehydrogenase complex, subunit D, integral membrane protein |
| G07      | Mm.379119 | NM_025650    | Uqcr11      | Ubiquinol-cytochrome c reductase, complex III subunit XI              |
| G08      | Mm.335460 | NM_025407    | Uqcrc1      | Ubiquinol-cytochrome c reductase core protein 1                       |
| G09      | Mm.334206 | NM_025899    | Uqcrc2      | Ubiquinol cytochrome c reductase core protein 2                       |
| G10      | Mm.181933 | NM_025710    | Uqcrcs1     | Ubiquinol-cytochrome c reductase, Rieske iron-sulfur polypeptide 1    |
| G11      | Mm.181721 | NM_025641    | Uqcrh       | Ubiquinol-cytochrome c reductase hinge protein                        |
| G12      | Mm.251621 | NM_025352    | Uqcrcq      | Ubiquinol-cytochrome c reductase, complex III subunit VII             |

SUPPLEMENTARY DATA

**Supplementary Table 2.** Comparison of gene expression profiles of b.END3 endothelial cells exposed to hyperglycemia and normoglycemic cells analyzed by the mouse mitochondrial energy metabolism gene expression array. Total RNA was isolated from b.End3 cells exposed to hyperglycemia or normoglycemia for 7 days using TRIzol® reagent. 2 µg RNA was treated with DNase (Epicentre, Madison, WI) and reverse transcription was carried out using High Capacity cDNA Archive kit (Applied Biosystems, Foster City, CA). 1 µg RNA was used for gene expression measurements using the mouse mitochondrial energy real-time PCR array (SABiosciences Frederick, MD) on CFX96 thermo cycler (Biorad, Hercules, CA). Threshold cycle (C<sub>T</sub>) values determined by CFX Manager were used to calculate expression changes with the RT<sup>2</sup> Profiler™ PCR Array Data Analysis tool supplied with the array. (Significant differences are shown in red.)

| Gene Symbol | Gene name                                                                                   | fold change       | T-TEST   | fold up- or down-regulation |
|-------------|---------------------------------------------------------------------------------------------|-------------------|----------|-----------------------------|
|             |                                                                                             | high glc /low glc | p value  | high glc/ low glc           |
| Lhpp        | Phospholysine phosphohistidine inorganic pyrophosphate phosphatase                          | 0.55              | 0.104956 | -1.83                       |
| Atp12a      | ATPase, H <sup>+</sup> /K <sup>+</sup> transporting, nongastric, alpha polypeptide          | 1.16              | 0.495906 | 1.16                        |
| Atp4a       | ATPase, H <sup>+</sup> /K <sup>+</sup> exchanging, gastric, alpha polypeptide               | 1.08              | 0.404976 | 1.08                        |
| Atp4b       | ATPase, H <sup>+</sup> /K <sup>+</sup> exchanging, beta polypeptide                         | 0.51              | 0.011622 | -1.97                       |
| Atp5a1      | ATP synthase, H <sup>+</sup> transporting, mitochondrial F1 complex, alpha subunit 1        | 0.91              | 0.081448 | -1.10                       |
| Atp5b       | ATP synthase, H <sup>+</sup> transporting mitochondrial F1 complex, beta subunit            | 1.09              | 0.272205 | 1.09                        |
| Atp5c1      | ATP synthase, H <sup>+</sup> transporting, mitochondrial F1 complex, gamma polypeptide 1    | 0.92              | 0.058275 | -1.08                       |
| Atp5d       | ATP synthase, H <sup>+</sup> transporting, mitochondrial F1 complex, delta subunit          | 1.03              | 0.633547 | 1.03                        |
| Atp5f1      | ATP synthase, H <sup>+</sup> transporting, mitochondrial F0 complex, subunit B1             | 1.01              | 0.757150 | 1.01                        |
| Atp5g1      | ATP synthase, H <sup>+</sup> transporting, mitochondrial F0 complex, subunit c1 (subunit 9) | 1.18              | 0.266908 | 1.18                        |
| Atp5g2      | ATP synthase, H <sup>+</sup> transporting, mitochondrial F0 complex, subunit C2 (subunit 9) | 1.00              | 0.872486 | -1.00                       |
| Atp5g3      | ATP synthase, H <sup>+</sup> transporting, mitochondrial F0 complex, subunit C3 (subunit 9) | 1.00              | 0.931517 | 1.00                        |
| Atp5h       | ATP synthase, H <sup>+</sup> transporting, mitochondrial F0 complex, subunit d              | 0.87              | 0.003010 | -1.14                       |
| Atp5j       | ATP synthase, H <sup>+</sup> transporting, mitochondrial F0 complex, subunit F              | 0.86              | 0.016573 | -1.16                       |
| Atp5j2      | ATP synthase, H <sup>+</sup> transporting, mitochondrial F0 complex, subunit F2             | 0.89              | 0.036442 | -1.12                       |
| Atp5o       | ATP synthase, H <sup>+</sup> transporting, mitochondrial F1 complex, O subunit              | 1.03              | 0.607019 | 1.03                        |
| Atp6v0a2    | ATPase, H <sup>+</sup> transporting, lysosomal V0 subunit A2                                | 0.93              | 0.191990 | -1.08                       |
| Atp6v0d2    | ATPase, H <sup>+</sup> transporting, lysosomal V0 subunit D2                                | 1.40              | 0.402090 | 1.40                        |
| Atp6v1c2    | ATPase, H <sup>+</sup> transporting, lysosomal V1 subunit C2                                | 1.35              | 0.195736 | 1.35                        |
| Atp6v1e2    | ATPase, H <sup>+</sup> transporting, lysosomal V1 subunit E2                                | 1.30              | 0.191061 | 1.30                        |
| Atp6v1g3    | ATPase, H <sup>+</sup> transporting, lysosomal V1 subunit G3                                | 1.16              | 0.495906 | 1.16                        |
| Bcs1l       | BCS1-like (yeast)                                                                           | 1.02              | 0.745362 | 1.02                        |
| Cox11       | COX11 homolog, cytochrome c oxidase assembly protein (yeast)                                | 0.99              | 0.846831 | -1.01                       |
| Cox4i1      | Cytochrome c oxidase subunit IV isoform 1                                                   | 1.02              | 0.740261 | 1.02                        |
| Cox4i2      | Cytochrome c oxidase subunit IV isoform 2                                                   | 1.29              | 0.014383 | 1.29                        |
| Cox5a       | Cytochrome c oxidase, subunit Va                                                            | 0.92              | 0.399742 | -1.09                       |
| Cox5b       | Cytochrome c oxidase, subunit Vb                                                            | 0.94              | 0.155015 | -1.06                       |
| Cox6a1      | Cytochrome c oxidase, subunit VI a, polypeptide 1                                           | 1.12              | 0.170281 | 1.12                        |
| Cox6a2      | Cytochrome c oxidase, subunit VI a, polypeptide 2                                           | 0.72              | 0.341071 | -1.40                       |
| Cox6b1      | Cytochrome c oxidase, subunit VIb polypeptide 1                                             | 0.94              | 0.072654 | -1.07                       |
| Cox6b2      | Cytochrome c oxidase subunit VIb polypeptide 2                                              | 0.83              | 0.058137 | -1.20                       |
| Cox6c       | Cytochrome c oxidase, subunit VIc                                                           | 0.90              | 0.107180 | -1.11                       |
| Cox7a2      | Cytochrome c oxidase, subunit VIIa 2                                                        | 0.91              | 0.062870 | -1.10                       |

SUPPLEMENTARY DATA

| Gene Symbol | Gene name                                                          | fold change       | T-TEST   | fold up- or down-regulation |
|-------------|--------------------------------------------------------------------|-------------------|----------|-----------------------------|
|             |                                                                    | high glc /low glc | p value  | high glc/ low glc           |
| Cox7a2l     | Cytochrome c oxidase subunit VIIa polypeptide 2-like               | 0.92              | 0.233821 | -1.08                       |
| Cox7b       | Cytochrome c oxidase subunit VIIb                                  | 0.90              | 0.013969 | -1.12                       |
| Cox8a       | Cytochrome c oxidase, subunit VIIIA                                | 0.99              | 0.667824 | -1.02                       |
| Cox8c       | Cytochrome c oxidase, subunit VIIIC                                | 1.16              | 0.495906 | 1.16                        |
| Cyc1        | Cytochrome c-1                                                     | 1.09              | 0.110352 | 1.09                        |
| Ndufa1      | NADH dehydrogenase (ubiquinone) 1 alpha subcomplex, 1              | 0.88              | 0.128230 | -1.13                       |
| Ndufa10     | NADH dehydrogenase (ubiquinone) 1 alpha subcomplex 10              | 1.01              | 0.792812 | 1.01                        |
| Ndufa11     | NADH dehydrogenase (ubiquinone) 1 alpha subcomplex 11              | 1.14              | 0.589318 | 1.14                        |
| Ndufa2      | NADH dehydrogenase (ubiquinone) 1 alpha subcomplex, 2              | 0.89              | 0.020925 | -1.12                       |
| Ndufa3      | NADH dehydrogenase (ubiquinone) 1 alpha subcomplex, 3              | 1.02              | 0.734265 | 1.02                        |
| Ndufa4      | NADH dehydrogenase (ubiquinone) 1 alpha subcomplex, 4              | 0.98              | 0.660552 | -1.02                       |
| Ndufa5      | NADH dehydrogenase (ubiquinone) 1 alpha subcomplex, 5              | 0.91              | 0.060937 | -1.10                       |
| Ndufa6      | NADH dehydrogenase (ubiquinone) 1 alpha subcomplex, 6 (B14)        | 0.91              | 0.072746 | -1.10                       |
| Ndufa7      | NADH dehydrogenase (ubiquinone) 1 alpha subcomplex, 7 (B14.5a)     | 1.02              | 0.204352 | 1.02                        |
| Ndufa8      | NADH dehydrogenase (ubiquinone) 1 alpha subcomplex, 8              | 0.82              | 0.032735 | -1.22                       |
| Ndufab1     | NADH dehydrogenase (ubiquinone) 1, alpha/beta subcomplex, 1        | 0.61              | 0.221531 | -1.63                       |
| Ndufb10     | NADH dehydrogenase (ubiquinone) 1 beta subcomplex, 10              | 1.46              | 0.242469 | 1.46                        |
| Ndufb2      | NADH dehydrogenase (ubiquinone) 1 beta subcomplex, 2               | 0.94              | 0.150036 | -1.07                       |
| Ndufb3      | NADH dehydrogenase (ubiquinone) 1 beta subcomplex 3                | 0.97              | 0.209182 | -1.03                       |
| Ndufb4      | NADH dehydrogenase (ubiquinone) 1 beta subcomplex 4                | 1.02              | 0.396472 | 1.02                        |
| Ndufb5      | NADH dehydrogenase (ubiquinone) 1 beta subcomplex, 5               | 0.64              | 0.113494 | -1.55                       |
| Ndufb6      | NADH dehydrogenase (ubiquinone) 1 beta subcomplex, 6               | 1.12              | 0.006489 | 1.12                        |
| Ndufb7      | NADH dehydrogenase (ubiquinone) 1 beta subcomplex, 7               | 0.83              | 0.077174 | -1.20                       |
| Ndufb8      | NADH dehydrogenase (ubiquinone) 1 beta subcomplex 8                | 0.98              | 0.491799 | -1.02                       |
| Ndufb9      | NADH dehydrogenase (ubiquinone) 1 beta subcomplex, 9               | 1.01              | 0.717582 | 1.01                        |
| Ndufc1      | NADH dehydrogenase (ubiquinone) 1, subcomplex unknown, 1           | 0.95              | 0.144298 | -1.05                       |
| Ndufc2      | NADH dehydrogenase (ubiquinone) 1, subcomplex unknown, 2           | 0.90              | 0.294585 | -1.11                       |
| Ndufs1      | NADH dehydrogenase (ubiquinone) Fe-S protein 1                     | 1.01              | 0.760374 | 1.01                        |
| Ndufs2      | NADH dehydrogenase (ubiquinone) Fe-S protein 2                     | 1.03              | 0.380073 | 1.03                        |
| Ndufs3      | NADH dehydrogenase (ubiquinone) Fe-S protein 3                     | 1.20              | 0.001463 | 1.20                        |
| Ndufs4      | NADH dehydrogenase (ubiquinone) Fe-S protein 4                     | 1.01              | 0.804763 | 1.01                        |
| Ndufs5      | NADH dehydrogenase (ubiquinone) Fe-S protein 5                     | 0.80              | 0.231159 | -1.26                       |
| Ndufs6      | NADH dehydrogenase (ubiquinone) Fe-S protein 6                     | 0.94              | 0.359973 | -1.07                       |
| Ndufs7      | NADH dehydrogenase (ubiquinone) Fe-S protein 7                     | 1.12              | 0.177052 | 1.12                        |
| Ndufs8      | NADH dehydrogenase (ubiquinone) Fe-S protein 8                     | 0.99              | 0.969348 | -1.01                       |
| Ndufv1      | NADH dehydrogenase (ubiquinone) flavoprotein 1                     | 1.00              | 0.995208 | -1.00                       |
| Ndufv2      | NADH dehydrogenase (ubiquinone) flavoprotein 2                     | 0.83              | 0.058661 | -1.21                       |
| Ndufv3      | NADH dehydrogenase (ubiquinone) flavoprotein 3                     | 0.86              | 0.174471 | -1.17                       |
| Oxa1l       | Oxidase assembly 1-like                                            | 1.07              | 0.074985 | 1.07                        |
| Ppa1        | Pyrophosphatase (inorganic) 1                                      | 1.41              | 0.005336 | 1.41                        |
| Ppa2        | Pyrophosphatase (inorganic) 2                                      | 0.86              | 0.008473 | -1.16                       |
| Sdha        | Succinate dehydrogenase complex, subunit A, flavoprotein (Fp)      | 1.00              | 0.975468 | 1.00                        |
| Sdhb        | Succinate dehydrogenase complex, subunit B, iron sulfur (Ip)       | 1.14              | 0.047328 | 1.14                        |
| Sdhc        | Succinate dehydrogenase complex, subunit C, membrane protein       | 1.16              | 0.020830 | 1.16                        |
| Sdhd        | Succinate dehydrogenase complex, subunit D, membrane protein       | 0.91              | 0.010970 | -1.10                       |
| Uqcr11      | Ubiquinol-cytochrome c reductase, complex III subunit XI           | 0.94              | 0.079199 | -1.06                       |
| Uqcrc1      | Ubiquinol-cytochrome c reductase core protein 1                    | 1.09              | 0.150281 | 1.09                        |
| Uqcrc2      | Ubiquinol-cytochrome c reductase core protein 2                    | 1.07              | 0.157631 | 1.07                        |
| Uqcrcs1     | Ubiquinol-cytochrome c reductase, Rieske iron-sulfur polypeptide 1 | 1.01              | 0.881551 | 1.01                        |

SUPPLEMENTARY DATA

| Gene Symbol | Gene name                                                 | fold change       | T-TEST   | fold up- or down-regulation |
|-------------|-----------------------------------------------------------|-------------------|----------|-----------------------------|
|             |                                                           | high glc /low glc | p value  | high glc/ low glc           |
| Uqcrh       | Ubiquinol-cytochrome c reductase hinge protein            | 0.81              | 0.002055 | -1.23                       |
| Uqcrc       | Ubiquinol-cytochrome c reductase, complex III subunit VII | 1.12              | 0.209514 | 1.12                        |

SUPPLEMENTARY DATA

**Supplementary Table 3.** Hit confirmation of hyperglycemia-induced mitochondrial ROS production screen. Compounds that decreased the mitochondrial ROS production by 25% (ROS score >1, ) but did not affect the viability (Viability score >-1) were re-tested at 10 μM in replicates (results shown in italic). Compounds were categorized as toxic compounds (TOX) if reduced the viability by 10%, confirmed hits (CONF. HIT) if showed ROS production decreasing activity without affecting the viability, or non-confirmed (NON CONF.) if the average decrease in ROS production was less than 10%. in the hit confirmation.

| Compound Name                                            | Biological Activity                                                                 | Compound Source Library | Change in mitoROS production (%) | ROS score    | ROS production MEAN±SEM | Viability MEAN±SEM | Result    |
|----------------------------------------------------------|-------------------------------------------------------------------------------------|-------------------------|----------------------------------|--------------|-------------------------|--------------------|-----------|
| <b>I. adrenergic compounds</b>                           |                                                                                     |                         |                                  |              |                         |                    |           |
| naphazoline hydrochloride                                | adrenergic vasoconstrictor                                                          | P                       | -40                              | <b>1.589</b> | -9±5                    | 86±3               | TOX       |
| xylazine                                                 | alpha-2-adrenergic agonist, sedative                                                | F                       | -27                              | <b>1.069</b> | -8±2                    | 92±2               | NON CONF. |
| prazosin                                                 | alpha 1-blocker                                                                     | F                       | -31                              | <b>1.247</b> | -11±3                   | 116±1              | CONF. HIT |
| alprenolol                                               | beta blocker                                                                        | F                       | -27                              | <b>1.068</b> | -8±2                    | 91±1               | NON CONF. |
| celiprolol HCl                                           | beta blocker                                                                        | P                       | -25                              | <b>1.016</b> | -11±2                   | 71±2               | TOX       |
| acetobutolol hydrochloride                               | beta1 antagonist                                                                    | P                       | -31                              | <b>1.240</b> | -13±2                   | 93±4               | CONF. HIT |
| pergolide mesylate                                       | dopaminergic agonist                                                                | P                       | -31                              | <b>1.224</b> | -4±2                    | 95±1               | NON CONF. |
| bromocryptine mesylate                                   | dopaminergic, prolactin inhibitor                                                   | P                       | -26                              | <b>1.044</b> | -2±2                    | 95±1               | NON CONF. |
| <b>II. antimicrobial and antihelminthic agents, etc.</b> |                                                                                     |                         |                                  |              |                         |                    |           |
| ampicillin trihydrate                                    | antibiotics, beta lactam                                                            | P                       | -25                              | <b>1.003</b> | -9±1                    | 87±4               | TOX       |
| cefadroxil                                               | antibiotics, bacterial transpeptidase inhibitor                                     | P                       | -29                              | <b>1.146</b> | -3±1                    | 97±1               | NON CONF. |
| clindamycin hydrochloride                                | antibiotics, ribosomal protein synthesis inhibitor                                  | P                       | -29                              | <b>1.171</b> | -1±3                    | 89±5               | TOX       |
| tetracycline hydrochloride                               | antibiotics                                                                         | N                       | -27                              | <b>1.092</b> | -19±3                   | 105±3              | CONF. HIT |
| thiamphenicol glycinate                                  | antibiotics                                                                         | F                       | -28                              | <b>1.116</b> | -9±3                    | 80±10              | TOX       |
| sisomicin sulfate                                        | antibiotics, ribosomal protein synthesis inhibitor                                  | P                       | -30                              | <b>1.209</b> | -2±1                    | 92±3               | NON CONF. |
| carbadox                                                 | antibiotics, inhibits DNA synthesis                                                 | P                       | -28                              | <b>1.137</b> | -2±3                    | 93±1               | NON CONF. |
| sulfachlorpyridazine                                     | antibiotics, sulfanilamide                                                          | U                       | -32                              | <b>1.285</b> | -7±3                    | 97±2               | NON CONF. |
| fenbendazole                                             | anthelmintic benzimidazole                                                          | F                       | -29                              | <b>1.152</b> | -24±4                   | 76±4               | TOX       |
| oxfendazole                                              | anthelmintic, benzimidazole                                                         | F                       | -25                              | <b>1.007</b> | -13±2                   | 98±2               | CONF. HIT |
| ivermectin B1a                                           | antihelminthic, GABAergic                                                           | P                       | -34                              | <b>1.369</b> | -4±4                    | 109±8              | NON CONF. |
| ivermectin                                               | antiparasitic agents, also a GABA agonist                                           | F                       | -26                              | <b>1.032</b> | -61±3                   | 6±1                | TOX       |
| itraconazole                                             | antifungal, triazole cytochrome P450 oxidase inhibitor                              | F                       | -34                              | <b>1.363</b> | -46±1                   | 55±8               | TOX       |
| glimepiride                                              | sulfonylurea anti-diabetic drug                                                     | F                       | -28                              | <b>1.117</b> | -33±2                   | 100±2              | CONF. HIT |
| <b>III. antidepressants</b>                              |                                                                                     |                         |                                  |              |                         |                    |           |
| paroxetine HCl                                           | antidepressant SSRI                                                                 | F, U, P,L,B,T           | -35                              | <b>1.397</b> | -50±4                   | 96±2               | CONF. HIT |
| paroxetine maleate                                       | antidepressant SSRI                                                                 | B                       | -33                              | <b>1.332</b> |                         |                    |           |
| methyl-paroxetine                                        | antidepressant SSRI                                                                 | B                       | -32                              | <b>1.260</b> |                         |                    |           |
| amoxapine                                                | antidepressant tricyclic                                                            | F,U                     | -31                              | <b>1.242</b> | -36±1                   | 71±2               | TOX       |
| sibutramine HCl                                          | antiobesity agent, neurotransmitter (serotonine, norepinephrine) reuptake inhibitor | P                       | -32                              | <b>1.298</b> | -6±3                    | 95±2               | NON CONF. |

SUPPLEMENTARY DATA

| Compound Name                                                    | Biological Activity                                                               | Compound Source Library | Change in mitoROS production (%) | ROS score    | ROS production MEAN± SEM | Viability MEAN± SEM | Result    |
|------------------------------------------------------------------|-----------------------------------------------------------------------------------|-------------------------|----------------------------------|--------------|--------------------------|---------------------|-----------|
| <b>IV. anti-inflammatory agents (steroids, NSAIDs, etc.)</b>     |                                                                                   |                         |                                  |              |                          |                     |           |
| betamethasone                                                    | glucocorticoid steroid                                                            | L                       | -30                              | <b>1.203</b> | -15±5                    | 132±9               | CONF. HIT |
| budesonide                                                       | glucocorticoid steroid                                                            | U,P,L                   | -39                              | <b>1.569</b> | -23±4                    | 111±1               | CONF. HIT |
| dexamethasone                                                    | glucocorticoid steroid                                                            | U                       | -23                              | <b>0.905</b> | -16±5                    | 100±4               | CONF. HIT |
| flunisolide                                                      | glucocorticoid steroid                                                            | U                       | -25                              | <b>1.002</b> | -25±6                    | 112±2               | CONF. HIT |
| flurandrenolide                                                  | glucocorticoid steroid                                                            | U                       | -28                              | <b>1.112</b> | -19±3                    | 110±1               | CONF. HIT |
| 6-alpha-methylprednisolone                                       | glucocorticoid steroid                                                            | P                       | -39                              | <b>1.547</b> | -17±1                    | 102±1               | CONF. HIT |
| triamcinolone                                                    | glucocorticoid steroid                                                            | P                       | -26                              | <b>1.049</b> | -11±2                    | 104±2               | CONF. HIT |
| acetylsalicylic acid                                             | NSAID                                                                             | L                       | -27                              | <b>1.091</b> | -9±3                     | 99±3                | NON CONF. |
| piroxicam                                                        | NSAID, highly selective inhibitor of COX-1                                        | P                       | -30                              | <b>1.198</b> | -13±2                    | 93±0                | CONF. HIT |
| tenoxicam                                                        | NSAID, COX inhibitor                                                              | P                       | -33                              | <b>1.304</b> | -7±3                     | 95±1                | NON CONF. |
| D-panthenol                                                      | antiinflammatory agent, provitamin of B5                                          | P                       | -58                              | <b>2.328</b> | -8±3                     | 99±3                | NON CONF. |
| sirolimus                                                        | immunosuppressant, with antifungal activity                                       | U                       | -26                              | <b>1.046</b> | -60±4                    | 103±1               | CONF. HIT |
| rolipram                                                         | PDE4-inhibitor, antiinflammatory                                                  | F                       | -26                              | <b>1.025</b> | 5±5                      | 103±3               | NON CONF. |
| <b>V. antimetabolites</b>                                        |                                                                                   |                         |                                  |              |                          |                     |           |
| thioguanosine                                                    | antimetabolite                                                                    | P                       | -42                              | <b>1.675</b> | -28±0                    | 150±4               | CONF. HIT |
| azaguanine-8                                                     | antimetabolite purine                                                             | P                       | -37                              | <b>1.487</b> | -40±2                    | 84±2                | TOX       |
| cytarabin                                                        | antimetabolite, chemotherapy agent                                                | U                       | -27                              | <b>1.072</b> | -23±2                    | 84±3                | TOX       |
| L-4 chlorophenylalanine                                          | antimetabolite                                                                    | N                       | -32                              | <b>1.278</b> | -3±5                     | 95±4                | NON CONF. |
| <b>VI. calcium channel inhibitors, calcium related compounds</b> |                                                                                   |                         |                                  |              |                          |                     |           |
| diltiazem hydrochloride                                          | calcium channel blocker, (L-Type)                                                 | P                       | -30                              | <b>1.210</b> | -11±1                    | 86±4                | TOX       |
| flunarizine                                                      | calcium channel blocker                                                           | U                       | -28                              | <b>1.116</b> | -31±6                    | 93±3                | CONF. HIT |
| loperamide hydrochloride                                         | calcium channel antagonist                                                        | P                       | -26                              | <b>1.057</b> | 5±2                      | 84±3                | TOX       |
| manidipine                                                       | calcium channel blocker                                                           | F                       | -31                              | <b>1.238</b> | -22±3                    | 89±2                | TOX       |
| nifedipine                                                       | calcium channel blocker                                                           | U                       | -26                              | <b>1.035</b> | -26±1                    | 88±5                | TOX       |
| niguldipine                                                      | calcium channel blocker                                                           | F                       | -25                              | <b>1.011</b> | -66±5                    | 0.00                | TOX       |
| perhexiline maleate                                              | calcium channel blocker, mitochondrial carnitine palmitoyltransferase-1 inhibitor | P                       | -27                              | <b>1.097</b> | -1±2                     | 70±4                | TOX       |
| pimozide                                                         | calcium channel inhibitor, caspase-3 inhibitor                                    | T                       | -48                              | <b>1.904</b> | 5±3                      | 91±4                | NON CONF. |

SUPPLEMENTARY DATA

| Compound Name                                         | Biological Activity                                                                           | Compound Source Library | Change in mitoROS production (%) | ROS score    | ROS production MEAN± SEM | Viability MEAN± SEM | Result    |
|-------------------------------------------------------|-----------------------------------------------------------------------------------------------|-------------------------|----------------------------------|--------------|--------------------------|---------------------|-----------|
| <b>VII. GABAergic mediators, inhibitors</b>           |                                                                                               |                         |                                  |              |                          |                     |           |
| carisoprodol                                          | GABA A receptor activator, centrally acting muscle relaxant                                   | P                       | -31                              | <b>1.220</b> | -5±5                     | 98±1                | NON CONF. |
| thiocolchicoside                                      | GABA agonist, muscle relaxant                                                                 | P                       | -30                              | <b>1.192</b> | 7±5                      | 99±2                | NON CONF. |
| gabazine                                              | GABA antagonist                                                                               | P                       | -37                              | <b>1.461</b> | -4±1                     | 96±1                | NON CONF. |
| <b>VIII. Glutamatergic mediators, inhibitors</b>      |                                                                                               |                         |                                  |              |                          |                     |           |
| 1-BCP                                                 | glutamatergic, selective potentiator of AMPA-mediated responses                               | T                       | -34                              | <b>1.379</b> | -21±3                    | 96±3                | CONF. HIT |
| <b>IX. cholinergic mediators, muscle relaxants</b>    |                                                                                               |                         |                                  |              |                          |                     |           |
| neostigmine                                           | parasympathomimetic that acts as a reversible acetylcholinesterase inhibitor                  | U                       | -29                              | <b>1.150</b> | -15±3                    | 94±2                | CONF. HIT |
| procyclidine HCl                                      | muscle relaxant, muscarinic antagonist, blocks of central cholinergic receptors M1, M2 and M4 | P                       | -27                              | <b>1.063</b> | -3±4                     | 100±3               | NON CONF. |
| <b>X. microtubular agents</b>                         |                                                                                               |                         |                                  |              |                          |                     |           |
| colchicine                                            | microtubular agent                                                                            | K, U                    | -28                              | <b>1.11</b>  | -29±5                    | 95±1                | CONF. HIT |
| nocodazole                                            | microtubule inhibitor                                                                         | T                       | -25                              | <b>1.00</b>  | -35±2                    | 92±4                | CONF. HIT |
| <b>XI. mitochondrial respiratory chain inhibitors</b> |                                                                                               |                         |                                  |              |                          |                     |           |
| roflumetinolol                                        | uncoupling agent, inhibits PKC isoforms                                                       | N                       | -38                              | <b>1.503</b> | -35±3                    | 96±2                | CONF. HIT |
| <b>XII. retinoids</b>                                 |                                                                                               |                         |                                  |              |                          |                     |           |
| acitretin                                             | retinoid, nuclear receptor regulator                                                          | P                       | -27                              | <b>1.073</b> | -25±4                    | 81±2                | TOX       |
| tretinoin                                             | retinoid, used in acute promyelocytic leukemia                                                | U                       | -34                              | <b>1.341</b> | -26±1                    | 108±4               | CONF. HIT |



SUPPLEMENTARY DATA

| Compound Name                             | Biological Activity                                                                                              | Compound Source Library | Change in mitoROS production (%) | ROS score    | ROS production MEAN± SEM | Viability MEAN± SEM | Result    |
|-------------------------------------------|------------------------------------------------------------------------------------------------------------------|-------------------------|----------------------------------|--------------|--------------------------|---------------------|-----------|
| <b>XIII. various compounds</b>            |                                                                                                                  |                         |                                  |              |                          |                     |           |
| <b>A) clinical drugs</b>                  |                                                                                                                  |                         |                                  |              |                          |                     |           |
| bromhexine                                | mucolytic agent                                                                                                  | F                       | -28                              | <b>1.122</b> | 7±5                      | 93±4                | NON CONF. |
| dimenhydrinate                            | H1 histamine antagonist                                                                                          | P                       | -33                              | <b>1.333</b> | -13±3                    | 89±1                | TOX       |
| promethazine                              | H1 receptor antagonist                                                                                           | F                       | -27                              | <b>1.075</b> | 1±4                      | 87±1                | TOX       |
| suloctidil                                | platelet inhibiting agent, vasodilator                                                                           | P                       | -32                              | <b>1.277</b> | -4±1                     | 70±3                | TOX       |
| cisapride                                 | 5-HT antagonist, peristaltic stimulant                                                                           | P                       | -35                              | <b>1.402</b> | -4±1                     | 90±1                | NON CONF. |
| racecadotril                              | antidiarrheal drug, enkephalinase inhibitor                                                                      | F                       | -25                              | <b>1.011</b> | -1±5                     | 102±1               | NON CONF. |
| canrenone                                 | aldosterone antagonist                                                                                           | F                       | -26                              | <b>1.045</b> | -7±3                     | 97±5                | NON CONF. |
| hydroflumethiazide                        | diuretics, Na <sup>+</sup> Cl <sup>-</sup> transport inhibitor, carbonic anhydrase inhibitor, cAMP PDE inhibitor | P                       | -41                              | <b>1.629</b> | -7±4                     | 90±1                | TOX       |
| sulfinpyrazone                            | uricosuric, inhibitor of the urate anion transporter, also CFTR and COX inhibitor                                | P                       | -26                              | <b>1.022</b> | -19±3                    | 80±5                | TOX       |
| <b>B) natural products</b>                |                                                                                                                  |                         |                                  |              |                          |                     |           |
| cytidine 5'-monophosphate                 | pyrimidine base                                                                                                  | N                       | -28                              | <b>1.121</b> | -12±4                    | 84±8                | TOX       |
| 5-hydroxy-3'-methoxyflavone               | cytotoxic flavonoid from Miliusa balansae, may reduce respiratory burst                                          | N                       | -26                              | <b>1.052</b> | 6±4                      | 113±2               | NON CONF. |
| L(+) citrulline                           | amino acid, participates in urea cycle                                                                           | N                       | -25                              | <b>1.005</b> | -13±1                    | 100±3               | CONF. HIT |
| <b>C) compounds for research use only</b> |                                                                                                                  |                         |                                  |              |                          |                     |           |
| chrysene-1,4-quinone                      | mutagenic agent                                                                                                  | P                       | -31                              | <b>1.240</b> | -12±2                    | 51±2                | TOX       |
| chromanol 293B                            | I <sub>Ks</sub> blocker. Also blocks I <sub>CFTR</sub>                                                           | T                       | -30                              | <b>1.213</b> | 1±1                      | 104±3               | NON CONF. |
| SG 209                                    | K <sup>+</sup> channel opener                                                                                    | T                       | -35                              | <b>1.405</b> | 0±4                      | 94±8                | NON CONF. |
| ivachtin                                  | caspase-3 inhibitor                                                                                              | T                       | -27                              | <b>1.067</b> | 5±5                      | 86±3                | TOX       |

SUPPLEMENTARY DATA

**Supplementary Table 4.** Comparison of gene expression profiles of b.END3 endothelial cells exposed to hyperglycemia with paroxetine treatment or vehicle analyzed by the mouse mitochondrial energy metabolism gene expression array. Gene expression changes were analyzed with mitochondrial energy array in bEND.3 cells exposed to hyperglycemia for 7 days and treated with paroxetine (10  $\mu$ M) or vehicle for 3 days as described for Suppl. Table 2. (Significant differences are shown in bold. Please note, that we could not confirm significant changes in Lhpp expression in subsequent tests and the C<sub>T</sub> values of Cox6a2 were above 35. Statistically significant, but less than 1.2-fold change in gene expression was not followed up.)

| Gene Symbol | Gene name                                                                       | fold change        | T-TEST   | fold up- or down-regulation |
|-------------|---------------------------------------------------------------------------------|--------------------|----------|-----------------------------|
|             |                                                                                 | high+PRX /high glc | p value  | high+PRX /high glc          |
| Lhpp        | Phospholysine phosphohistidine inorganic pyrophosphate phosphatase              | 1.49               | 0.013856 | 1.49                        |
| Atp12a      | ATPase, H+/K+ transporting, nongastric, alpha polypeptide                       | 1.30               | 0.181013 | 1.30                        |
| Atp4a       | ATPase, H+/K+ exchanging, gastric, alpha polypeptide                            | 1.06               | 0.738769 | 1.06                        |
| Atp4b       | ATPase, H+/K+ exchanging, beta polypeptide                                      | 1.01               | 0.962724 | 1.01                        |
| Atp5a1      | ATP synthase, H+ transporting, mitochondrial F1 complex, alpha subunit 1        | 1.04               | 0.586647 | 1.04                        |
| Atp5b       | ATP synthase, H+ transporting mitochondrial F1 complex, beta subunit            | 1.02               | 0.907093 | 1.02                        |
| Atp5c1      | ATP synthase, H+ transporting, mitochondrial F1 complex, gamma polypeptide 1    | 1.13               | 0.068191 | 1.13                        |
| Atp5d       | ATP synthase, H+ transporting, mitochondrial F1 complex, delta subunit          | 1.06               | 0.595067 | 1.06                        |
| Atp5f1      | ATP synthase, H+ transporting, mitochondrial F0 complex, subunit B1             | 1.01               | 0.806560 | 1.01                        |
| Atp5g1      | ATP synthase, H+ transporting, mitochondrial F0 complex, subunit c1 (subunit 9) | 0.84               | 0.495957 | -1.20                       |
| Atp5g2      | ATP synthase, H+ transporting, mitochondrial F0 complex, subunit C2 (subunit 9) | 1.07               | 0.184877 | 1.07                        |
| Atp5g3      | ATP synthase, H+ transporting, mitochondrial F0 complex, subunit C3 (subunit 9) | 0.93               | 0.384719 | -1.07                       |
| Atp5h       | ATP synthase, H+ transporting, mitochondrial F0 complex, subunit d              | 1.15               | 0.025099 | 1.15                        |
| Atp5j       | ATP synthase, H+ transporting, mitochondrial F0 complex, subunit F              | 1.12               | 0.015634 | 1.12                        |
| Atp5j2      | ATP synthase, H+ transporting, mitochondrial F0 complex, subunit F2             | 1.12               | 0.194507 | 1.12                        |
| Atp5o       | ATP synthase, H+ transporting, mitochondrial F1 complex, O subunit              | 1.08               | 0.421280 | 1.08                        |
| Atp6v0a2    | ATPase, H+ transporting, lysosomal V0 subunit A2                                | 1.06               | 0.012648 | 1.06                        |
| Atp6v0d2    | ATPase, H+ transporting, lysosomal V0 subunit D2                                | 0.86               | 0.362030 | -1.17                       |
| Atp6v1c2    | ATPase, H+ transporting, lysosomal V1 subunit C2                                | 1.04               | 0.963301 | 1.04                        |
| Atp6v1e2    | ATPase, H+ transporting, lysosomal V1 subunit E2                                | 1.04               | 0.916908 | 1.04                        |
| Atp6v1g3    | ATPase, H+ transporting, lysosomal V1 subunit G3                                | 1.30               | 0.181013 | 1.30                        |
| Bcs1l       | BCS1-like (yeast)                                                               | 1.01               | 0.872749 | 1.01                        |
| Cox11       | COX11 homolog, cytochrome c oxidase assembly protein (yeast)                    | 0.96               | 0.322245 | -1.05                       |
| Cox4i1      | Cytochrome c oxidase subunit IV isoform 1                                       | 1.13               | 0.476330 | 1.13                        |
| Cox4i2      | Cytochrome c oxidase subunit IV isoform 2                                       | 1.07               | 0.116874 | 1.07                        |
| Cox5a       | Cytochrome c oxidase, subunit Va                                                | 1.08               | 0.515839 | 1.08                        |
| Cox5b       | Cytochrome c oxidase, subunit Vb                                                | 1.07               | 0.194962 | 1.07                        |
| Cox6a1      | Cytochrome c oxidase, subunit VI a, polypeptide 1                               | 0.87               | 0.071195 | -1.15                       |
| Cox6a2      | Cytochrome c oxidase, subunit VI a, polypeptide 2                               | 2.61               | 0.001383 | 2.61                        |
| Cox6b1      | Cytochrome c oxidase, subunit VIb polypeptide 1                                 | 1.11               | 0.062478 | 1.11                        |
| Cox6b2      | Cytochrome c oxidase subunit VIb polypeptide 2                                  | 1.30               | 0.236259 | 1.30                        |
| Cox6c       | Cytochrome c oxidase, subunit VIc                                               | 1.13               | 0.263812 | 1.13                        |
| Cox7a2      | Cytochrome c oxidase, subunit VIIa 2                                            | 1.19               | 0.164027 | 1.19                        |
| Cox7a2l     | Cytochrome c oxidase subunit VIIa polypeptide 2-like                            | 1.01               | 0.856668 | 1.01                        |
| Cox7b       | Cytochrome c oxidase subunit VIIb                                               | 1.13               | 0.207663 | 1.13                        |
| Cox8a       | Cytochrome c oxidase, subunit VIIa                                              | 1.15               | 0.151049 | 1.15                        |

SUPPLEMENTARY DATA

| Gene Symbol | Gene name                                                          | fold change        | T-TEST   | fold up- or down- regulation |
|-------------|--------------------------------------------------------------------|--------------------|----------|------------------------------|
|             |                                                                    | high+PRX /high glc | p value  | high+PRX /high glc           |
| Cox8c       | Cytochrome c oxidase, subunit VIIIc                                | 1.30               | 0.181013 | 1.30                         |
| Cyc1        | Cytochrome c-1                                                     | 0.94               | 0.186497 | -1.06                        |
| Ndufa1      | NADH dehydrogenase (ubiquinone) 1 alpha subcomplex, 1              | 1.19               | 0.021836 | 1.19                         |
| Ndufa10     | NADH dehydrogenase (ubiquinone) 1 alpha subcomplex 10              | 1.08               | 0.135229 | 1.08                         |
| Ndufa11     | NADH dehydrogenase (ubiquinone) 1 alpha subcomplex 11              | 0.82               | 0.814655 | -1.22                        |
| Ndufa2      | NADH dehydrogenase (ubiquinone) 1 alpha subcomplex, 2              | 1.08               | 0.108171 | 1.08                         |
| Ndufa3      | NADH dehydrogenase (ubiquinone) 1 alpha subcomplex, 3              | 1.08               | 0.062500 | 1.08                         |
| Ndufa4      | NADH dehydrogenase (ubiquinone) 1 alpha subcomplex, 4              | 1.04               | 0.635004 | 1.04                         |
| Ndufa5      | NADH dehydrogenase (ubiquinone) 1 alpha subcomplex, 5              | 1.02               | 0.754086 | 1.02                         |
| Ndufa6      | NADH dehydrogenase (ubiquinone) 1 alpha subcomplex, 6 (B14)        | 1.23               | 0.052835 | 1.23                         |
| Ndufa7      | NADH dehydrogenase (ubiquinone) 1 alpha subcomplex, 7 (B14.5a)     | 1.04               | 0.143405 | 1.04                         |
| Ndufa8      | NADH dehydrogenase (ubiquinone) 1 alpha subcomplex, 8              | 0.96               | 0.701452 | -1.04                        |
| Ndufab1     | NADH dehydrogenase (ubiquinone) 1, alpha/beta subcomplex, 1        | 1.35               | 0.062480 | 1.35                         |
| Ndufb10     | NADH dehydrogenase (ubiquinone) 1 beta subcomplex, 10              | 0.91               | 0.619764 | -1.10                        |
| Ndufb2      | NADH dehydrogenase (ubiquinone) 1 beta subcomplex, 2               | 1.04               | 0.558614 | 1.04                         |
| Ndufb3      | NADH dehydrogenase (ubiquinone) 1 beta subcomplex 3                | 0.96               | 0.597986 | -1.04                        |
| Ndufb4      | NADH dehydrogenase (ubiquinone) 1 beta subcomplex 4                | 1.04               | 0.074337 | 1.04                         |
| Ndufb5      | NADH dehydrogenase (ubiquinone) 1 beta subcomplex, 5               | 1.07               | 0.874418 | 1.07                         |
| Ndufb6      | NADH dehydrogenase (ubiquinone) 1 beta subcomplex, 6               | 1.04               | 0.419691 | 1.04                         |
| Ndufb7      | NADH dehydrogenase (ubiquinone) 1 beta subcomplex, 7               | 1.16               | 0.080872 | 1.16                         |
| Ndufb8      | NADH dehydrogenase (ubiquinone) 1 beta subcomplex 8                | 1.03               | 0.664122 | 1.03                         |
| Ndufb9      | NADH dehydrogenase (ubiquinone) 1 beta subcomplex, 9               | 1.01               | 0.856513 | 1.01                         |
| Ndufc1      | NADH dehydrogenase (ubiquinone) 1, subcomplex unknown, 1           | 1.09               | 0.176985 | 1.09                         |
| Ndufc2      | NADH dehydrogenase (ubiquinone) 1, subcomplex unknown, 2           | 0.97               | 0.794978 | -1.03                        |
| Ndufs1      | NADH dehydrogenase (ubiquinone) Fe-S protein 1                     | 1.10               | 0.152897 | 1.10                         |
| Ndufs2      | NADH dehydrogenase (ubiquinone) Fe-S protein 2                     | 1.01               | 0.750776 | 1.01                         |
| Ndufs3      | NADH dehydrogenase (ubiquinone) Fe-S protein 3                     | 1.03               | 0.604331 | 1.03                         |
| Ndufs4      | NADH dehydrogenase (ubiquinone) Fe-S protein 4                     | 0.99               | 0.801664 | -1.01                        |
| Ndufs5      | NADH dehydrogenase (ubiquinone) Fe-S protein 5                     | 1.07               | 0.324852 | 1.07                         |
| Ndufs6      | NADH dehydrogenase (ubiquinone) Fe-S protein 6                     | 1.14               | 0.125132 | 1.14                         |
| Ndufs7      | NADH dehydrogenase (ubiquinone) Fe-S protein 7                     | 1.03               | 0.835572 | 1.03                         |
| Ndufs8      | NADH dehydrogenase (ubiquinone) Fe-S protein 8                     | 0.88               | 0.437864 | -1.14                        |
| Ndufv1      | NADH dehydrogenase (ubiquinone) flavoprotein 1                     | 1.05               | 0.551239 | 1.05                         |
| Ndufv2      | NADH dehydrogenase (ubiquinone) flavoprotein 2                     | 1.11               | 0.294270 | 1.11                         |
| Ndufv3      | NADH dehydrogenase (ubiquinone) flavoprotein 3                     | 1.23               | 0.292898 | 1.23                         |
| Oxa1l       | Oxidase assembly 1-like                                            | 1.15               | 0.066023 | 1.15                         |
| Ppa1        | Pyrophosphatase (inorganic) 1                                      | 0.95               | 0.313819 | -1.05                        |
| Ppa2        | Pyrophosphatase (inorganic) 2                                      | 1.19               | 0.054890 | 1.19                         |
| Sdha        | Succinate dehydrogenase complex, subunit A, flavoprotein (Fp)      | 1.02               | 0.719138 | 1.02                         |
| Sdhb        | Succinate dehydrogenase complex, subunit B, iron sulfur (Ip)       | 1.00               | 0.961844 | -1.00                        |
| Sdhc        | Succinate dehydrogenase complex, subunit C, membrane protein       | 1.11               | 0.084638 | 1.11                         |
| Sdhd        | Succinate dehydrogenase complex, subunit D, membrane protein       | 1.03               | 0.747767 | 1.03                         |
| Uqcr11      | Ubiquinol-cytochrome c reductase, complex III subunit XI           | 1.10               | 0.118082 | 1.10                         |
| Uqcrc1      | Ubiquinol-cytochrome c reductase core protein 1                    | 0.99               | 0.429415 | -1.01                        |
| Uqcrc2      | Ubiquinol cytochrome c reductase core protein 2                    | 1.01               | 0.924818 | 1.01                         |
| Uqcrrs1     | Ubiquinol-cytochrome c reductase, Rieske iron-sulfur polypeptide 1 | 1.11               | 0.067253 | 1.11                         |
| Uqcrh       | Ubiquinol-cytochrome c reductase hinge protein                     | 1.11               | 0.269416 | 1.11                         |
| Uqcrq       | Ubiquinol-cytochrome c reductase, complex III subunit VII          | 1.09               | 0.194837 | 1.09                         |

SUPPLEMENTARY DATA

Supplementary Table 5. Primary screen results

|     | Name                                                                                                                        | Library | Plate No | Row | Column | ROS score | viability score |
|-----|-----------------------------------------------------------------------------------------------------------------------------|---------|----------|-----|--------|-----------|-----------------|
| 1   | Nalbuphine                                                                                                                  | NIH     | 1        | A   | 2      | -0.422    | -0.002          |
| 2   | Raclopride                                                                                                                  | NIH     | 1        | B   | 2      | -0.437    | -0.166          |
| 3   | Zacopride                                                                                                                   | NIH     | 1        | C   | 2      | 0.548     | -0.027          |
| 4   | SKF 83568                                                                                                                   | NIH     | 1        | D   | 2      | -0.609    | -0.575          |
| 5   | 3&apost;-deoxydenoaline                                                                                                     | NIH     | 1        | E   | 2      | 0.033     | -1.085          |
| 6   | AM 404                                                                                                                      | NIH     | 1        | F   | 2      | -0.825    | 0.336           |
| 7   | PILLOCARPINE HYDROCHLORIDE                                                                                                  | NIH     | 1        | G   | 2      | -0.614    | 0.822           |
| 8   | NIFEDIPINE                                                                                                                  | NIH     | 1        | H   | 2      | -0.79     | 3.346           |
| 9   | CPD00042823                                                                                                                 | NIH     | 1        | A   | 3      | -0.721    | -1.207          |
| 10  | 3-HYDROXY-1,2-DIMETHYL-4(1H)-PYRIDONE                                                                                       | NIH     | 1        | B   | 3      | -0.085    | 0.307           |
| 11  | LOXAPINE SUCCINATE                                                                                                          | NIH     | 1        | C   | 3      | 0.99      | -0.575          |
| 12  | D-3-Methoxy-N-methylmorphinan hydrobromide                                                                                  | NIH     | 1        | D   | 3      | 0.775     | -1.094          |
| 13  | Duloxetine                                                                                                                  | NIH     | 1        | E   | 3      | -0.288    | 1.087           |
| 14  | Glycine, N-[2-(acetilythio)methyl]-1-oxo-3-phenylpropyl-, phenylmethyl ester [CAS]                                          | NIH     | 1        | F   | 3      | 0.094     | 0.429           |
| 15  | Benzeneacetic acid, 2-[2,6-dichlorophenylamino]-, monosodium salt [CAS]                                                     | NIH     | 1        | G   | 3      | 0.318     | 1.161           |
| 16  | PROGESTERONE                                                                                                                | NIH     | 1        | H   | 3      | 0.134     | 1.447           |
| 17  | FAMOTIDINE                                                                                                                  | NIH     | 1        | A   | 4      | -1.575    | -0.745          |
| 18  | SR 57,227A                                                                                                                  | NIH     | 1        | B   | 4      | -0.583    | -0.14           |
| 19  | Pancuronium                                                                                                                 | NIH     | 1        | C   | 4      | 0.303     | -0.104          |
| 20  | METRONIDAZOLE                                                                                                               | NIH     | 1        | D   | 4      | 0.317     | 0.147           |
| 21  | Benzeneacetic acid, Alpha-(hydroxymethyl)-, 3-methyl-3-oxa-9-azabicyclo[3.3.1.0 <sup>2,4</sup> ]non-7-yl ester, [1(S)-1Alph | NIH     | 1        | E   | 4      | 0.019     | 0.605           |
| 22  | Benzeneacetonitrile, Alpha-[3-[2-(3,4-dimethoxyphenyl)ethyl]methylamino]propyl]-3,4-dimethoxy-Alpha-1-meth                  | NIH     | 1        | F   | 4      | 0.492     | 1.291           |
| 23  | Benzeneethanamine, N,Alpha-dimethyl-N-2-propynyl-(R)- [CAS]                                                                 | NIH     | 1        | G   | 4      | 0.005     | 1.339           |
| 24  | Capalsin                                                                                                                    | NIH     | 1        | H   | 4      | -1.511    | 1.749           |
| 25  | SALBUTAMOL SULFATE                                                                                                          | NIH     | 1        | A   | 5      | -1.371    | -1.939          |
| 26  | (+)-Vesamicol hydrochloride                                                                                                 | NIH     | 1        | B   | 5      | -0.671    | -1.612          |
| 27  | Picrotin - Picrotoxinin                                                                                                     | NIH     | 1        | C   | 5      | 0.095     | -0.493          |
| 28  | Terazosin                                                                                                                   | NIH     | 1        | D   | 5      | -0.103    | -0.952          |
| 29  | Olfenylcyclopropanone                                                                                                       | NIH     | 1        | E   | 5      | 0.328     | 1.372           |
| 30  | 4-Thiazolidinecarboxylic acid, 2-oxo-, (R)- [CAS]                                                                           | NIH     | 1        | F   | 5      | -0.046    | 0.014           |
| 31  | Mesoridazine                                                                                                                | NIH     | 1        | G   | 5      | -0.544    | 1.351           |
| 32  | 3[2H]-Pyridazone, 6-[4-(difluoromethoxy)-3-methoxyphenyl]- [CAS]                                                            | NIH     | 1        | H   | 5      | -0.182    | 1.056           |
| 33  | 10H-Phenothiazine, 2-chloro-10-[3-(4-methyl-piperazinyl)propyl]- [CAS]                                                      | NIH     | 1        | A   | 6      | -0.697    | -0.992          |
| 34  | 1H-Cyclopenta[b]quinolin-9-amine, 2,3,5,5,7,8-hexahydro-, monohydrochloride- [CAS]                                          | NIH     | 1        | B   | 6      | 0.42      | -0.03           |
| 35  | CLOTRIMAZOLE                                                                                                                | NIH     | 1        | C   | 6      | 0.144     | -0.2            |
| 36  | LORATADINE                                                                                                                  | NIH     | 1        | D   | 6      | 0.846     | 0.637           |
| 37  | PHENELZINE SULFATE SALT                                                                                                     | NIH     | 1        | E   | 6      | 0.072     | 0.939           |
| 38  | Riluzole                                                                                                                    | NIH     | 1        | F   | 6      | -0.03     | 0.904           |
| 39  | Naltrindole                                                                                                                 | NIH     | 1        | G   | 6      | 0.28      | 0.489           |
| 40  | Normicotine                                                                                                                 | NIH     | 1        | H   | 6      | -0.999    | -0.047          |
| 41  | Bifemelane                                                                                                                  | NIH     | 1        | A   | 7      | 0.336     | -0.725          |
| 42  | CGS 15943                                                                                                                   | NIH     | 1        | B   | 7      | -0.154    | 1.808           |
| 43  | Cinanserin                                                                                                                  | NIH     | 1        | C   | 7      | -0.042    | 0.208           |
| 44  | Cisapride                                                                                                                   | NIH     | 1        | D   | 7      | 0.371     | 0.448           |
| 45  | Indatraline                                                                                                                 | NIH     | 1        | E   | 7      | 0.397     | 0.474           |
| 46  | TRAZODONE HYDROCHLORIDE                                                                                                     | NIH     | 1        | F   | 7      | -0.431    | 0.823           |
| 47  | Praozoln                                                                                                                    | NIH     | 1        | G   | 7      | -0.315    | 1.823           |
| 48  | URAPIDIL HYDROCHLORIDE                                                                                                      | NIH     | 1        | H   | 7      | -0.686    | 1.039           |
| 49  | (-)-Cotinine                                                                                                                | NIH     | 1        | A   | 8      | -0.313    | -1.738          |
| 50  | D-CYCLOSERINE                                                                                                               | NIH     | 1        | B   | 8      | 0.77      | -0.981          |
| 51  | Flvoxamine                                                                                                                  | NIH     | 1        | C   | 8      | 0.323     | -1.165          |
| 52  | Doxepin                                                                                                                     | NIH     | 1        | D   | 8      | 0.353     | -1.705          |
| 53  | YRIFLUOPERAZINE DIHYDROCHLORIDE                                                                                             | NIH     | 1        | E   | 8      | -0.154    | -0.157          |
| 54  | (+)-3-HYDROXY-N-METHYLMORPHINAN D-TARTRATE                                                                                  | NIH     | 1        | F   | 8      | -0.088    | -0.484          |
| 55  | L-Omitiline, HS-[mimo(methylamino)methyl]-[CAS]                                                                             | NIH     | 1        | G   | 8      | -1.173    | 0.453           |
| 56  | Maprotiline HCl                                                                                                             | NIH     | 1        | H   | 8      | -1.505    | 0.01            |
| 57  | Pizotyline                                                                                                                  | NIH     | 1        | A   | 9      | -0.221    | -2.141          |
| 58  | BETA-ESTRADIOL                                                                                                              | NIH     | 1        | B   | 9      | -0.349    | -0.868          |
| 59  | N,N&apost;-DIACETYL-1,6-DIAMINOHEXANE                                                                                       | NIH     | 1        | C   | 9      | -0.168    | -0.874          |
| 60  | DIPHENHYDRAMINE HYDROCHLORIDE                                                                                               | NIH     | 1        | D   | 9      | -0.108    | -1.535          |
| 61  | Galanthamine                                                                                                                | NIH     | 1        | E   | 9      | -0.095    | -0.995          |
| 62  | Ifenprodil                                                                                                                  | NIH     | 1        | F   | 9      | -0.447    | 0.052           |
| 63  | TETRAETHYLTHURAM DISULFIDE                                                                                                  | NIH     | 1        | G   | 9      | -0.132    | -0.01           |
| 64  | Piribedil                                                                                                                   | NIH     | 1        | H   | 9      | -1.156    | 0.081           |
| 65  | KETOCONAZOLE                                                                                                                | NIH     | 1        | A   | 10     | 0.047     | -1.25           |
| 66  | TRIPLENNAMINE HYDROCHLORIDE                                                                                                 | NIH     | 1        | B   | 10     | -0.316    | 0.077           |
| 67  | Pyrazinecarboxamide, 3,5-diamino-N-(aminomimomethyl)-6-chloro- [CAS]                                                        | NIH     | 1        | C   | 10     | 0.393     | -0.893          |
| 68  | 8-AMINO-1,2,3,4-TETRAHYDROACRIDINE HYDROCHLORIDE                                                                            | NIH     | 1        | D   | 10     | -0.271    | -1.558          |
| 69  | ETHYNYLESTRADIOL                                                                                                            | NIH     | 1        | E   | 10     | 0.336     | 0.03            |
| 70  | 2[1H]-Pyrimidinone, 4-amino-1-yl-6-arabino-furanosyl- [CAS]                                                                 | NIH     | 1        | F   | 10     | 0.011     | -0.788          |
| 71  | L-glutamic acid, N-[4-[[2,4-diamino-5-pteridinyl)methyl]methylamino]benzoyl]- [CAS]                                         | NIH     | 1        | G   | 10     | 0.03      | -0.542          |
| 72  | TFMPP                                                                                                                       | NIH     | 1        | H   | 10     | -0.913    | 0.712           |
| 73  | Pramipexole                                                                                                                 | NIH     | 1        | A   | 11     | -0.737    | -1.569          |
| 74  | LIDOCaine                                                                                                                   | NIH     | 1        | B   | 11     | -0.146    | 0.159           |
| 75  | Indomethacin                                                                                                                | NIH     | 1        | C   | 11     | 0.48      | 0.612           |
| 76  | LY 171883                                                                                                                   | NIH     | 1        | D   | 11     | 0.44      | 0.316           |
| 77  | Paroxetine                                                                                                                  | NIH     | 1        | E   | 11     | 1.414     | -0.153          |
| 78  | Epigallocatechin gallate                                                                                                    | NIH     | 1        | F   | 11     | -0.725    | 0.631           |
| 79  | 5-Amino-2-hydroxy-benzoic acid                                                                                              | NIH     | 1        | G   | 11     | 0.191     | 0.265           |
| 80  | Oxiranecarboxylic acid, 2-[6-[4-chlorophenoxy]hexyl]-, ethyl ester- [CAS]                                                   | NIH     | 1        | H   | 11     | -0.656    | -0.327          |
| 81  | Cephalexin monohydrate                                                                                                      | NIH     | 2        | A   | 2      | -0.959    | -0.023          |
| 82  | PIDOTIMOD                                                                                                                   | NIH     | 2        | B   | 2      | -0.746    | -0.323          |
| 83  | RAMP1RL                                                                                                                     | NIH     | 2        | C   | 2      | 0.644     | 0.361           |
| 84  | LEVOFLOXACIN                                                                                                                | NIH     | 2        | D   | 2      | -0.638    | -0.235          |
| 85  | 15-Nortestosterone                                                                                                          | NIH     | 2        | E   | 2      | 0.272     | 0.04            |
| 86  | NIZATIDINE                                                                                                                  | NIH     | 2        | F   | 2      | 0.059     | -0.122          |
| 87  | 5-FLUOROCYTOSINE                                                                                                            | NIH     | 2        | G   | 2      | -0.024    | -0.083          |
| 88  | Trileptal                                                                                                                   | NIH     | 2        | H   | 2      | -0.322    | 0.137           |
| 89  | TROXIPIDE                                                                                                                   | NIH     | 2        | A   | 3      | -1.123    | -0.172          |
| 90  | ACTARIT                                                                                                                     | NIH     | 2        | B   | 3      | -0.054    | 0.056           |
| 91  | AZELASTINE HCl                                                                                                              | NIH     | 2        | C   | 3      | 0.224     | 0.656           |
| 92  | TOCAINIDE                                                                                                                   | NIH     | 2        | D   | 3      | 0.546     | -0.154          |
| 93  | TAXIFOLIN(+/-)                                                                                                              | NIH     | 2        | E   | 3      | 0.067     | 0.721           |
| 94  | FENPIVERINIUM BROMIDE                                                                                                       | NIH     | 2        | F   | 3      | 0.295     | 0.801           |
| 95  | CEFATRIZONE PROPYLENE GLYCOL                                                                                                | NIH     | 2        | G   | 3      | -0.232    | -0.027          |
| 96  | IDEBENONE                                                                                                                   | NIH     | 2        | H   | 3      | -0.508    | 0.425           |
| 97  | LEVOSULPIRIDE                                                                                                               | NIH     | 2        | A   | 4      | -0.759    | -1.38           |
| 98  | Pemoline                                                                                                                    | NIH     | 2        | B   | 4      | 0.084     | -0.694          |
| 99  | LETROZOL                                                                                                                    | NIH     | 2        | C   | 4      | 0.372     | -0.48           |
| 100 | MEROPENEM                                                                                                                   | NIH     | 2        | D   | 4      | 0.573     | -0.677          |
| 101 | ORLISTAT                                                                                                                    | NIH     | 2        | E   | 4      | 0.062     | 0.14            |
| 102 | ONDANSETRON HCl                                                                                                             | NIH     | 2        | F   | 4      | 0.862     | 0.59            |
| 103 | LEVONORGESTREL                                                                                                              | NIH     | 2        | G   | 4      | -0.014    | -0.369          |
| 104 | CETRAZATE HCl                                                                                                               | NIH     | 2        | H   | 4      | -0.888    | -0.452          |
| 105 | Alprazolam                                                                                                                  | NIH     | 2        | A   | 5      | -0.94     | -0.25           |

SUPPLEMENTARY DATA

|     | Name                                             | Library | Plate No | Row | Column | ROS score | viability score |
|-----|--------------------------------------------------|---------|----------|-----|--------|-----------|-----------------|
| 106 | LAMOTRIGINE                                      | NIH     | 2        | B   | 5      | 0.38      | -0.195          |
| 107 | CROTYAMION                                       | NIH     | 2        | C   | 5      | 0.453     | -0.343          |
| 108 | AMFEBUTAMONE HCl                                 | NIH     | 2        | D   | 5      | 0.082     | -0.3            |
| 109 | ALFUZOSIN                                        | NIH     | 2        | E   | 5      | 0.451     | 0.447           |
| 110 | Amlsulpride                                      | NIH     | 2        | F   | 5      | 0.235     | -0.013          |
| 111 | LOFEPRAMINE                                      | NIH     | 2        | G   | 5      | -0.434    | 0.033           |
| 112 | PEROSPIRON HCl                                   | NIH     | 2        | H   | 5      | -0.951    | 2.138           |
| 113 | DOCETAXEL                                        | NIH     | 2        | A   | 6      | 0.275     | -2.609          |
| 114 | HONORIOL                                         | NIH     | 2        | B   | 6      | -0.264    | 0.135           |
| 115 | TOLTERODINE TARTRATE                             | NIH     | 2        | C   | 6      | 0.343     | 0.554           |
| 116 | CARMOFUR                                         | NIH     | 2        | D   | 6      | 1.126     | 0.112           |
| 117 | METHYL PAROXETINE                                | NIH     | 2        | E   | 6      | 1.26      | 0.249           |
| 118 | OLMESARTAN MEDOXOMIL                             | NIH     | 2        | F   | 6      | 0.122     | 0.029           |
| 119 | LOSARTAN Potassium                               | NIH     | 2        | G   | 6      | 0.022     | -0.17           |
| 120 | TEMOZOLOMIDE                                     | NIH     | 2        | H   | 6      | -0.576    | -0.117          |
| 121 | Methylselenite                                   | NIH     | 2        | A   | 7      | 0.854     | -2.639          |
| 122 | TOSUFLOXACIN TOSYLATE                            | NIH     | 2        | B   | 7      | 0.062     | 0.765           |
| 123 | MECILLINAM                                       | NIH     | 2        | C   | 7      | -0.097    | 0.963           |
| 124 | ATOMOXETINE HCl                                  | NIH     | 2        | D   | 7      | 0.188     | 0.11            |
| 125 | ARTESUNATE                                       | NIH     | 2        | E   | 7      | -0.217    | -0.257          |
| 126 | ITRACONAZOLE                                     | NIH     | 2        | F   | 7      | 0.734     | -0.138          |
| 127 | CEFPodoxime PROXETIL                             | NIH     | 2        | G   | 7      | -0.733    | 0.297           |
| 128 | BUFLomedil HYDROCHLORIDE                         | NIH     | 2        | H   | 7      | -0.356    | 0.309           |
| 129 | 4-Chloro-N-(2-morpholin-4-yl-ethyl)-benzamide    | NIH     | 2        | A   | 8      | -0.858    | 0.28            |
| 130 | HALOMETASONE MONOHYDRATE                         | NIH     | 2        | B   | 8      | 0.377     | 0.811           |
| 131 | TRICLABENDAZOLE                                  | NIH     | 2        | C   | 8      | -0.771    | 0.661           |
| 132 | ROFECOXIB                                        | NIH     | 2        | D   | 8      | -0.069    | 0.449           |
| 133 | BISOPROLOL FUMARATE                              | NIH     | 2        | E   | 8      | -0.404    | 0.673           |
| 134 | EZETIMIBE                                        | NIH     | 2        | F   | 8      | 0.417     | 0.595           |
| 135 | TIAGABINE HCl                                    | NIH     | 2        | G   | 8      | -0.523    | 0.566           |
| 136 | IDARUBICIN HCl                                   | NIH     | 2        | H   | 8      | 1.95      | -5.992          |
| 137 | FLUBENDAZOLE                                     | NIH     | 2        | A   | 9      | -0.235    | -1.991          |
| 138 | TACROLIMUS                                       | NIH     | 2        | B   | 9      | 0.375     | 1.836           |
| 139 | VALACICLOVIR HYDROCHLORIDE                       | NIH     | 2        | C   | 9      | 0.149     | -0.124          |
| 140 | CLARITHROMYCIN                                   | NIH     | 2        | D   | 9      | -0.297    | 0.475           |
| 141 | ARIPRAZOLE                                       | NIH     | 2        | E   | 9      | -0.156    | 0.404           |
| 142 | TRIMEBUTINE MALEATE                              | NIH     | 2        | F   | 9      | -0.564    | 0.566           |
| 143 | Mestranolone                                     | NIH     | 2        | G   | 9      | -0.744    | 0.402           |
| 144 | NISOLDIPINE                                      | NIH     | 2        | H   | 9      | -1.277    | -0.343          |
| 145 | PICEID                                           | NIH     | 2        | A   | 10     | -1.066    | 0.16            |
| 146 | 1-(2-Methyl-5-nitro-1-imidazol-1-yl)-propan-2-ol | NIH     | 2        | B   | 10     | -0.174    | -0.048          |
| 147 | NIFEKALANT HCl                                   | NIH     | 2        | C   | 10     | 0.029     | -0.306          |
| 148 | NATEGLINIDE                                      | NIH     | 2        | D   | 10     | 0.072     | 0.034           |
| 149 | MEGESTROL ACETATE                                | NIH     | 2        | E   | 10     | -0.192    | 0.346           |
| 150 | ORMETOPRIM                                       | NIH     | 2        | F   | 10     | -0.098    | 0.528           |
| 151 | ZILEUTON                                         | NIH     | 2        | G   | 10     | -0.439    | 0.306           |
| 152 | STAVUDINE                                        | NIH     | 2        | H   | 10     | -1.242    | 0.5             |
| 153 | GABEXATE MESYLATE                                | NIH     | 2        | A   | 11     | -0.361    | 0.108           |
| 154 | OXICONAZOLE NITRATE                              | NIH     | 2        | B   | 11     | -0.396    | -0.182          |
| 155 | KITASAMYCIN                                      | NIH     | 2        | C   | 11     | 0.918     | -1.539          |
| 156 | FAMCICLOVIR                                      | NIH     | 2        | D   | 11     | -0.153    | 0.407           |
| 157 | (+)-Sotalol hydrochloride                        | NIH     | 2        | E   | 11     | 0.175     | 0.523           |
| 158 | RUFLOXACIN HCl                                   | NIH     | 2        | F   | 11     | -0.218    | 0.895           |
| 159 | TAXIFOLIN (-)                                    | NIH     | 2        | G   | 11     | -1.319    | 0.767           |
| 160 | ALOSETRON HCl                                    | NIH     | 2        | H   | 11     | -1.059    | 0.607           |
| 161 | BUPROPION HYDROCHLORIDE                          | NIH     | 3        | A   | 2      | 0.264     | 0.221           |
| 162 | IRSOGLADINE MALEATE                              | NIH     | 3        | B   | 2      | 0.019     | 0.03            |
| 163 | ACARBOSE                                         | NIH     | 3        | C   | 2      | -0.148    | 0.379           |
| 164 | BENPROPERINE PHOSPHATE                           | NIH     | 3        | D   | 2      | -1.372    | 0.072           |
| 165 | PHENPROBAMATE                                    | NIH     | 3        | E   | 2      | -0.007    | 0.292           |
| 166 | MEMANTINE HYDROCHLORIDE                          | NIH     | 3        | F   | 2      | -0.152    | 0.132           |
| 167 | Carvedilol                                       | NIH     | 3        | G   | 2      | -2.134    | -0.048          |
| 168 | LOMIFYLLINE                                      | NIH     | 3        | H   | 2      | -0.582    | 0.232           |
| 169 | PAZUFLOXACIN                                     | NIH     | 3        | A   | 3      | -0.196    | 0.255           |
| 170 | MIGLITOL                                         | NIH     | 3        | B   | 3      | 0.155     | 0.256           |
| 171 | TRANILAST                                        | NIH     | 3        | C   | 3      | -0.373    | 0.347           |
| 172 | OLANZAPINE                                       | NIH     | 3        | D   | 3      | 0.265     | 0.246           |
| 173 | Nefazodone                                       | NIH     | 3        | E   | 3      | -0.061    | 0.017           |
| 174 | MOXIFLOXACIN HCl                                 | NIH     | 3        | F   | 3      | -0.368    | 0.07            |
| 175 | NELFINAVIR MESYLATE                              | NIH     | 3        | G   | 3      | -0.383    | -0.013          |
| 176 | PRAVASTATIN Sodium                               | NIH     | 3        | H   | 3      | -0.873    | 0.204           |
| 177 | TOPOTECAN HCl                                    | NIH     | 3        | A   | 4      | -0.145    | -0.726          |
| 178 | LEVETIRACETAM                                    | NIH     | 3        | B   | 4      | -0.385    | 0.309           |
| 179 | PRAMIPEXOLE HCl                                  | NIH     | 3        | C   | 4      | -0.206    | 0.397           |
| 180 | RISPERIDONE                                      | NIH     | 3        | D   | 4      | -0.308    | 0.214           |
| 181 | PIGLITAZONE HCl                                  | NIH     | 3        | E   | 4      | 0.119     | 0.177           |
| 182 | CILASTATIN Na                                    | NIH     | 3        | F   | 4      | -0.072    | 0.002           |
| 183 | ARGATROBAN                                       | NIH     | 3        | G   | 4      | -0.46     | -0.044          |
| 184 | VALDECOXIB                                       | NIH     | 3        | H   | 4      | -1.084    | 0.111           |
| 185 | NAFTOPIDIL                                       | NIH     | 3        | A   | 5      | -1.018    | 0.32            |
| 186 | Nobiletin                                        | NIH     | 3        | B   | 5      | 0.248     | 0.445           |
| 187 | FINASTERIDE                                      | NIH     | 3        | C   | 5      | 0.458     | 0.292           |
| 188 | ZOLPIDEM TARTRATE                                | NIH     | 3        | D   | 5      | 0.277     | 0.473           |
| 189 | Viramune                                         | NIH     | 3        | E   | 5      | 0.246     | 0.572           |
| 190 | TOPIRAMATE                                       | NIH     | 3        | F   | 5      | 0.167     | 0.185           |
| 191 | VORICONAZOLE                                     | NIH     | 3        | G   | 5      | -0.397    | 0.17            |
| 192 | FENOLDOPAM MESYLATE                              | NIH     | 3        | H   | 5      | -0.642    | 0.697           |
| 193 | ROSIGLITAZONE MALEATE                            | NIH     | 3        | A   | 6      | -0.283    | 0.317           |
| 194 | ESCITALOPRAM OXALATE                             | NIH     | 3        | B   | 6      | -0.179    | 0.056           |
| 195 | ZERANOL                                          | NIH     | 3        | C   | 6      | 0.327     | 0.185           |
| 196 | LATANOPROST                                      | NIH     | 3        | D   | 6      | 0.04      | 0.301           |
| 197 | 2',3'-bis-O-(3,4-dideoxyinosine)                 | NIH     | 3        | E   | 6      | -0.122    | 0.097           |
| 198 | Sertraline                                       | NIH     | 3        | F   | 6      | -0.702    | -0.173          |
| 199 | CALCIPOTRIOL                                     | NIH     | 3        | G   | 6      | -0.504    | -0.084          |
| 200 | EPIDURICIN HYDROCHLORIDE                         | NIH     | 3        | H   | 6      | 2.432     | -3.215          |
| 201 | BICALUTAMIDE                                     | NIH     | 3        | A   | 7      | -0.26     | 0.497           |
| 202 | BENIDIPINE HCl                                   | NIH     | 3        | B   | 7      | 0.059     | 0.205           |
| 203 | AMLEXANOX                                        | NIH     | 3        | C   | 7      | 2.545     | -2.822          |
| 204 | CERIVASTATIN Na                                  | NIH     | 3        | D   | 7      | 2.406     | -3.131          |
| 205 | ICARIN                                           | NIH     | 3        | E   | 7      | 0.484     | 0.314           |
| 206 | METHYLANDROSTENEDIOL                             | NIH     | 3        | F   | 7      | -0.109    | 0.216           |
| 207 | TRIPTOlide                                       | NIH     | 3        | G   | 7      | 2.241     | -3.248          |
| 208 | ROSIGLITAZONE HCl                                | NIH     | 3        | H   | 7      | -0.642    | 0.283           |
| 209 | FTORAFUR                                         | NIH     | 3        | A   | 8      | -1.101    | 0.28            |
| 210 | OLIGOMYCIN C                                     | NIH     | 3        | B   | 8      | -0.25     | 0.701           |

SUPPLEMENTARY DATA

|     | Name                                                                                                                                          | Library | Plate No | Row | Column | ROS score | viability score |
|-----|-----------------------------------------------------------------------------------------------------------------------------------------------|---------|----------|-----|--------|-----------|-----------------|
| 211 | BENAZEPRIL HCl                                                                                                                                | NIH     | 3        | C   | 8      | 0.222     | -0.833          |
| 212 | Oxymetolone                                                                                                                                   | NIH     | 3        | D   | 8      | 2.365     | -3.078          |
| 213 | IPRIFLAVONE                                                                                                                                   | NIH     | 3        | E   | 8      | 0.233     | 0.829           |
| 214 | OXAPROZIN                                                                                                                                     | NIH     | 3        | F   | 8      | -0.741    | 0.898           |
| 215 | ROLIPRAM                                                                                                                                      | NIH     | 3        | G   | 8      | 0.008     | 0.941           |
| 216 | MOSAPRIDE CITRATE                                                                                                                             | NIH     | 3        | H   | 8      | -0.795    | 1.06            |
| 217 | ISOGUERCETRYN                                                                                                                                 | NIH     | 3        | A   | 9      | -0.613    | 0.351           |
| 218 | FLUMAZENIL                                                                                                                                    | NIH     | 3        | B   | 9      | -0.305    | 0.442           |
| 219 | OZAGREL HCl                                                                                                                                   | NIH     | 3        | C   | 9      | 1.91      | -2.548          |
| 220 | HYPEROSIDE                                                                                                                                    | NIH     | 3        | D   | 9      | 0.047     | 0.512           |
| 221 | RIFABUTIN                                                                                                                                     | NIH     | 3        | E   | 9      | 0.123     | 0.444           |
| 222 | ESMOLOL HYDROCHLORIDE                                                                                                                         | NIH     | 3        | F   | 9      | -0.388    | 0.512           |
| 223 | TADALAFIL                                                                                                                                     | NIH     | 3        | G   | 9      | -0.723    | 0.786           |
| 224 | Modafinil                                                                                                                                     | NIH     | 3        | H   | 9      | -1.259    | 0.449           |
| 225 | DOXORUBICIN HYDROCHLORIDE                                                                                                                     | NIH     | 3        | A   | 10     | 2.095     | -3.23           |
| 226 | MOXONIDINE HCl                                                                                                                                | NIH     | 3        | B   | 10     | 0.014     | 0.161           |
| 227 | Nitrazepam                                                                                                                                    | NIH     | 3        | C   | 10     | -0.035    | 0.282           |
| 228 | PEFLOXACIN MESYLATE                                                                                                                           | NIH     | 3        | D   | 10     | 0.134     | 0.391           |
| 229 | VENLAFAXINE HCl                                                                                                                               | NIH     | 3        | E   | 10     | -0.509    | 0.426           |
| 230 | PANTOPRAZOLE SODIUM SALT                                                                                                                      | NIH     | 3        | F   | 10     | -0.037    | 0.64            |
| 231 | FLUTICASON PROPIONATE                                                                                                                         | NIH     | 3        | G   | 10     | -0.395    | 0.558           |
| 232 | INDINAVIR SULPHATE                                                                                                                            | NIH     | 3        | H   | 10     | -0.418    | 1.138           |
| 233 | MIDAZOLAM HCl                                                                                                                                 | NIH     | 3        | A   | 11     | -0.558    | 0.108           |
| 234 | LAMIVUDINE                                                                                                                                    | NIH     | 3        | B   | 11     | -0.619    | 0.067           |
| 235 | PROCARBAZINE HCl                                                                                                                              | NIH     | 3        | C   | 11     | -0.546    | -0.159          |
| 236 | ESOMEPRAZOLE Mg                                                                                                                               | NIH     | 3        | D   | 11     | -0.87     | -0.001          |
| 237 | SULFASALAZINE                                                                                                                                 | NIH     | 3        | E   | 11     | -0.832    | 0.256           |
| 238 | TORASEMIDE                                                                                                                                    | NIH     | 3        | F   | 11     | -1.115    | 0.266           |
| 239 | TROPisetron HCl                                                                                                                               | NIH     | 3        | G   | 11     | -1.41     | 0.718           |
| 240 | Ranolazine dihydrochloride                                                                                                                    | NIH     | 3        | H   | 11     | -1.745    | 0.571           |
| 241 | NITRENDIPINE                                                                                                                                  | NIH     | 4        | A   | 2      | -1.055    | -0.811          |
| 242 | SAQUINAVIR MESYLATE                                                                                                                           | NIH     | 4        | B   | 2      | 0.535     | 1.407           |
| 243 | BIFONAZOLE                                                                                                                                    | NIH     | 4        | C   | 2      | 0.159     | 0.913           |
| 244 | SUMATRIPTAN SUCCINATE                                                                                                                         | NIH     | 4        | D   | 2      | -0.187    | 0.687           |
| 245 | EXEMESTANE                                                                                                                                    | NIH     | 4        | E   | 2      | -1.131    | -0.179          |
| 246 | NITAZOXANIDE                                                                                                                                  | NIH     | 4        | F   | 2      | 0.729     | 0.723           |
| 247 | Diazepam                                                                                                                                      | NIH     | 4        | G   | 2      | -0.473    | 0.169           |
| 248 | QUETIAPINE HEMIFUMARATE                                                                                                                       | NIH     | 4        | H   | 2      | -0.525    | 0.524           |
| 249 | RUTIN                                                                                                                                         | NIH     | 4        | A   | 3      | -0.303    | -1.202          |
| 250 | PENCICLOVIR                                                                                                                                   | NIH     | 4        | B   | 3      | 0.342     | 0.971           |
| 251 | CALCIROL                                                                                                                                      | NIH     | 4        | C   | 3      | 0.988     | 1.438           |
| 252 | DIPHENOXYLATE                                                                                                                                 | NIH     | 4        | D   | 3      | 0.377     | 0.09            |
| 253 | Fabamata                                                                                                                                      | NIH     | 4        | E   | 3      | 0.065     | -0.822          |
| 254 | DROPERIDOL                                                                                                                                    | NIH     | 4        | F   | 3      | 0.189     | -0.241          |
| 255 | Pentoxifylline                                                                                                                                | NIH     | 4        | G   | 3      | -0.164    | -0.534          |
| 256 | TORADOL                                                                                                                                       | NIH     | 4        | H   | 3      | -0.868    | -0.301          |
| 257 | RITONAVIR                                                                                                                                     | NIH     | 4        | A   | 4      | 0.972     | -0.237          |
| 258 | VINORELBINE BITARTRATE                                                                                                                        | NIH     | 4        | B   | 4      | 1.857     | -3.56           |
| 259 | LINZOLIDE                                                                                                                                     | NIH     | 4        | C   | 4      | 0.48      | 0.514           |
| 260 | LOMERIZINE DIHCl                                                                                                                              | NIH     | 4        | D   | 4      | 0.224     | 0.188           |
| 261 | EFAVIRENZ                                                                                                                                     | NIH     | 4        | E   | 4      | 0.17      | -0.825          |
| 262 | IRBESARTAN                                                                                                                                    | NIH     | 4        | F   | 4      | 0.643     | 0.549           |
| 263 | REPAGLINIDE                                                                                                                                   | NIH     | 4        | G   | 4      | 0.357     | -1.375          |
| 264 | Ethylacetranol                                                                                                                                | NIH     | 4        | H   | 4      | -1.263    | -0.584          |
| 265 | PTEROSTILBENE                                                                                                                                 | NIH     | 4        | A   | 5      | -0.829    | 0.683           |
| 266 | ROXATIDINE ACETATE HCl                                                                                                                        | NIH     | 4        | B   | 5      | -0.21     | -0.015          |
| 267 | DEXBROMPHENIRAMINE MALEATE                                                                                                                    | NIH     | 4        | C   | 5      | 0.167     | 0.512           |
| 268 | ANAGRELIDE HCl                                                                                                                                | NIH     | 4        | D   | 5      | -0.263    | -0.259          |
| 269 | TEGASEROD MALEATE                                                                                                                             | NIH     | 4        | E   | 5      | 0.154     | -0.437          |
| 270 | MILRINONE                                                                                                                                     | NIH     | 4        | F   | 5      | -0.239    | -0.414          |
| 271 | LEVOCETIRIZINE                                                                                                                                | NIH     | 4        | G   | 5      | -0.535    | -0.454          |
| 272 | Citalopram hydrobromide                                                                                                                       | NIH     | 4        | H   | 5      | -0.86     | -0.323          |
| 273 | TICLOPIDINE HCl                                                                                                                               | NIH     | 4        | A   | 6      | -1.104    | -0.574          |
| 274 | LOXOPROFEN SODIUM                                                                                                                             | NIH     | 4        | B   | 6      | 0.128     | 1.057           |
| 275 | ZAFIRLUKAST                                                                                                                                   | NIH     | 4        | C   | 6      | 0.697     | 2.208           |
| 276 | TERBINAFINE HCl                                                                                                                               | NIH     | 4        | D   | 6      | 0.81      | 0.198           |
| 277 | ISRADIPINE                                                                                                                                    | NIH     | 4        | E   | 6      | 0.024     | -1.362          |
| 278 | VALSARTAN                                                                                                                                     | NIH     | 4        | F   | 6      | -0.335    | -0.331          |
| 279 | Piroxicam                                                                                                                                     | NIH     | 4        | G   | 6      | -0.364    | -1.338          |
| 280 | GLYCOPYRROLATE                                                                                                                                | NIH     | 4        | H   | 6      | -1.141    | -1.036          |
| 281 | Physostigmine                                                                                                                                 | NIH     | 4        | A   | 7      | -0.553    | 1.505           |
| 282 | LOBELINE HYDROCHLORIDE                                                                                                                        | NIH     | 4        | B   | 7      | 0.594     | 1.154           |
| 283 | DOXYLAMINE SUCCINATE                                                                                                                          | NIH     | 4        | C   | 7      | 0.471     | 0.878           |
| 284 | Milnacipran                                                                                                                                   | NIH     | 4        | D   | 7      | 0.557     | 1.297           |
| 285 | 5-fluoro-2-pyrimidone                                                                                                                         | NIH     | 4        | E   | 7      | 0.098     | 0.266           |
| 286 | Chlorpheniramine                                                                                                                              | NIH     | 4        | F   | 7      | 0.535     | -0.198          |
| 287 | DOFETILIDE                                                                                                                                    | NIH     | 4        | G   | 7      | -1.036    | -1.265          |
| 288 | FORMOTEROL FUMARATE DIHYDRATE                                                                                                                 | NIH     | 4        | H   | 7      | -1.169    | -0.317          |
| 289 | RIZATRIPTAN BENZOATE                                                                                                                          | NIH     | 4        | A   | 8      | -1.14     | 1.076           |
| 290 | RIFAPENTINE                                                                                                                                   | NIH     | 4        | B   | 8      | -0.28     | 1.034           |
| 291 | LOTEPREDNOL ETABONATE                                                                                                                         | NIH     | 4        | C   | 8      | 0.038     | 0.844           |
| 292 | ENALAPRILAT                                                                                                                                   | NIH     | 4        | D   | 8      | 0.048     | -0.538          |
| 293 | Donepezil                                                                                                                                     | NIH     | 4        | E   | 8      | -0.233    | -0.174          |
| 294 | Nimetazepam                                                                                                                                   | NIH     | 4        | F   | 8      | -0.697    | -0.675          |
| 295 | NICORANDIL                                                                                                                                    | NIH     | 4        | G   | 8      | -1.021    | -0.495          |
| 296 | TELMISARTAN                                                                                                                                   | NIH     | 4        | H   | 8      | -3.162    | 0.547           |
| 297 | ITOPRIDE HCl                                                                                                                                  | NIH     | 4        | A   | 9      | -0.76     | -1.135          |
| 298 | RIFAXIMIN                                                                                                                                     | NIH     | 4        | B   | 9      | 0.231     | -0.124          |
| 299 | MONTELUKAST Na                                                                                                                                | NIH     | 4        | C   | 9      | 0.242     | 0.511           |
| 300 | 2,3,4,5-tetrahydro-2H-pyrido[2,3-b][1,4]benzodiazepin-5-one, 11-[[2-[(diethylamino)methyl]-1-piperidinyl]acetyl]-5,11-dihydro- [CAS]          | NIH     | 4        | D   | 9      | 0.484     | -0.514          |
| 301 | 1H-Imidazol-2-amine, N-(2,6-dichlorophenyl)-4,5-dihydro- [CAS]                                                                                | NIH     | 4        | E   | 9      | 0.485     | -0.573          |
| 302 | 6H-Pyrido[2,3-b][1,4]benzodiazepin-5-one, 11-[[2-[(diethylamino)methyl]-1-piperidinyl]acetyl]-5,11-dihydro- [CAS]                             | NIH     | 4        | F   | 9      | -0.114    | -0.8            |
| 303 | 1H-Indole-2-propanoic acid, 1-[(4-chlorophenyl)methyl]-3-[(1,1-dimethylethyl)thio]-alpha, alpha-dimethyl-5-(1-methyl-1H-imidazol-2-yl)- [CAS] | NIH     | 4        | G   | 9      | -0.194    | -0.988          |
| 304 | 1H-Imidazole-5-carboxylic acid, 1-(1-phenylethyl)-, ethyl ester, (R)- [CAS]                                                                   | NIH     | 4        | H   | 9      | -1.286    | -0.521          |
| 305 | Acetamide, 2-amino-N-(1-methyl-1,2-diphenylethyl)-, (-)- [CAS]                                                                                | NIH     | 4        | A   | 10     | -0.355    | -1.469          |
| 306 | Altanserin                                                                                                                                    | NIH     | 4        | B   | 10     | 0.524     | 0.078           |
| 307 | BETAXOLOL HYDROCHLORIDE                                                                                                                       | NIH     | 4        | C   | 10     | 0.739     | -0.15           |
| 308 | INDARUBICIN                                                                                                                                   | NIH     | 4        | D   | 10     | 0.215     | 1.542           |
| 309 | Azasetron                                                                                                                                     | NIH     | 4        | E   | 10     | 0.672     | -0.228          |
| 310 | GR 89596                                                                                                                                      | NIH     | 4        | F   | 10     | -0.117    | 0.171           |
| 311 | DELTA1-HYDROCORTISONE 21-HEMISUCCINATE SODIUM SALT                                                                                            | NIH     | 4        | G   | 10     | -0.549    | 0.366           |
| 312 | DIAZOXIDE                                                                                                                                     | NIH     | 4        | H   | 10     | -1.491    | -0.06           |
| 313 | 2-CHLOROADENOSINE                                                                                                                             | NIH     | 4        | A   | 11     | -1.441    | -3.162          |
| 314 | ORNIDAZOLE                                                                                                                                    | NIH     | 4        | B   | 11     | 0.358     | 0.302           |
| 315 | 1,1-DIMETHYL-4-PHENYLPYPERAZINIUM IODIDE                                                                                                      | NIH     | 4        | C   | 11     | 0.1       | 0.775           |



SUPPLEMENTARY DATA

|     | Name                                                                                                             | Library | Plate No | Row | Column | ROS score | viability score |
|-----|------------------------------------------------------------------------------------------------------------------|---------|----------|-----|--------|-----------|-----------------|
| 316 | PIRENERONE                                                                                                       | NIH     | 4        | D   | 11     | 0.622     | 0.4231          |
| 317 | MESTRANOL                                                                                                        | NIH     | 4        | E   | 11     | 0.48      | 2.2011          |
| 318 | 2-[2-AMINOETHYL]PYRIDINE                                                                                         | NIH     | 4        | F   | 11     | 0.557     | 0.714           |
| 319 | BENACTYZINE HYDROCHLORIDE                                                                                        | NIH     | 4        | G   | 11     | -0.004    | 1.5451          |
| 320 | DICHLOROACETIC ACID                                                                                              | NIH     | 4        | H   | 11     | -0.75     | 0.4821          |
| 321 | BESTATIN                                                                                                         | NIH     | 5        | A   | 2      | -0.534    | 0.0821          |
| 322 | TORSEMIFENE CITRATE                                                                                              | NIH     | 5        | B   | 2      | -0.445    | 1.3971          |
| 323 | GOSERELIN ACETATE                                                                                                | NIH     | 5        | C   | 2      | -0.3      | 0.1971          |
| 324 | SECOISOLARICINESINOL                                                                                             | NIH     | 5        | D   | 2      | -0.932    | -0.21           |
| 325 | RALTITREXED                                                                                                      | NIH     | 5        | E   | 2      | 0.234     | -0.2711         |
| 326 | DOXAPRAM HYDROCHLORIDE                                                                                           | NIH     | 5        | F   | 2      | 0.089     | -0.2561         |
| 327 | RU 24969                                                                                                         | NIH     | 5        | G   | 2      | -0.147    | 0.7891          |
| 328 | Bruclne                                                                                                          | NIH     | 5        | H   | 2      | -0.097    | 0.6691          |
| 329 | TRYPTOLINE                                                                                                       | NIH     | 5        | A   | 3      | -0.322    | 0.1941          |
| 330 | FLUPHENAZINE HYDROCHLORIDE                                                                                       | NIH     | 5        | B   | 3      | 0.299     | 0.0831          |
| 331 | PALONOSETRON HCl                                                                                                 | NIH     | 5        | C   | 3      | 0.368     | 0.5231          |
| 332 | NAPROXEN SODIUM                                                                                                  | NIH     | 5        | D   | 3      | 0.345     | 0.0661          |
| 333 | MEPIVACAINE HYDROCHLORIDE                                                                                        | NIH     | 5        | E   | 3      | 0.121     | 0.2271          |
| 334 | 3-[3,5-DIBROMO-4-HYDROXYBENZOYL]-2-ETHYLBENZOFURAN                                                               | NIH     | 5        | F   | 3      | -0.054    | -0.1861         |
| 335 | NIMODIPINE                                                                                                       | NIH     | 5        | G   | 3      | -0.543    | 0.5121          |
| 336 | ROLIET RACVCLINE                                                                                                 | NIH     | 5        | H   | 3      | -0.649    | 1.07            |
| 337 | MEPIRIZOLE                                                                                                       | NIH     | 5        | A   | 4      | -0.476    | 0.3991          |
| 338 | 6-AZAURIDINE                                                                                                     | NIH     | 5        | B   | 4      | -0.928    | -0.0731         |
| 339 | Reichstein's substance 3                                                                                         | NIH     | 5        | C   | 4      | 0.032     | 0.5411          |
| 340 | 3-PYRIDINEMETHANOL                                                                                               | NIH     | 5        | D   | 4      | -0.122    | -0.3641         |
| 341 | Haloperidol                                                                                                      | NIH     | 5        | E   | 4      | -0.039    | -0.14           |
| 342 | Sibipentol                                                                                                       | NIH     | 5        | F   | 4      | -0.118    | -0.3551         |
| 343 | Flupentapine                                                                                                     | NIH     | 5        | G   | 4      | -0.229    | 0.2311          |
| 344 | OXYPHENONIUM BROMIDE                                                                                             | NIH     | 5        | H   | 4      | -0.436    | 0.2911          |
| 345 | Homoveratrylamine                                                                                                | NIH     | 5        | A   | 5      | -0.122    | 1.1381          |
| 346 | TINIDAZOLE                                                                                                       | NIH     | 5        | B   | 5      | -0.324    | 0.2271          |
| 347 | XANTHINOL NICOTINATE                                                                                             | NIH     | 5        | C   | 5      | -0.306    | 0.6071          |
| 348 | SYNEPHRINE                                                                                                       | NIH     | 5        | D   | 5      | -0.242    | 0.1111          |
| 349 | RESVERATROL                                                                                                      | NIH     | 5        | E   | 5      | 0.11      | -0.1391         |
| 350 | MALTYOL                                                                                                          | NIH     | 5        | F   | 5      | -0.505    | -0.1491         |
| 351 | 6-AMINOINDAZOLE                                                                                                  | NIH     | 5        | G   | 5      | -0.722    | 0.0431          |
| 352 | ENROFLOXACIN                                                                                                     | NIH     | 5        | H   | 5      | 0.073     | 1.0141          |
| 353 | DEHYDROCHOLIC ACID                                                                                               | NIH     | 5        | A   | 6      | -0.871    | 0.32            |
| 354 | CEFACLOR                                                                                                         | NIH     | 5        | B   | 6      | -0.733    | 0.1191          |
| 355 | 1-BENZYLIMIDAZOLE                                                                                                | NIH     | 5        | C   | 6      | -0.584    | -0.0491         |
| 356 | DULOXETINE HCl                                                                                                   | NIH     | 5        | D   | 6      | -0.886    | -0.0151         |
| 357 | VARDEFNIL CITRATE                                                                                                | NIH     | 5        | E   | 6      | -0.254    | 0.0081          |
| 358 | ROPIVACAINE HCl                                                                                                  | NIH     | 5        | F   | 6      | -0.324    | -0.1141         |
| 359 | ANASTROZOLE                                                                                                      | NIH     | 5        | G   | 6      | -0.282    | 0.1361          |
| 360 | KETOTIFEN FUMARATE                                                                                               | NIH     | 5        | H   | 6      | 0.004     | 0.5691          |
| 361 | MEDROXYPROGESTERONE                                                                                              | NIH     | 5        | A   | 7      | 0.021     | 0.9321          |
| 362 | Pinacillin monohydrate                                                                                           | NIH     | 5        | B   | 7      | -0.105    | 0.9021          |
| 363 | 7-NITROINDAZOLE                                                                                                  | NIH     | 5        | C   | 7      | 0.449     | 0.1471          |
| 364 | 5-Methoxytryptamine                                                                                              | NIH     | 5        | D   | 7      | -0.491    | -0.0821         |
| 365 | PHENOTHIAZINE                                                                                                    | NIH     | 5        | E   | 7      | -0.619    | -0.2561         |
| 366 | 2-CHLORO-2'-DEOXYADENOSINE                                                                                       | NIH     | 5        | F   | 7      | -0.056    | -0.7681         |
| 367 | GRANISETRON HCl                                                                                                  | NIH     | 5        | G   | 7      | -0.45     | 0.3961          |
| 368 | Rimcazole                                                                                                        | NIH     | 5        | H   | 7      | -0.434    | 0.7821          |
| 369 | Nafadotida                                                                                                       | NIH     | 5        | A   | 8      | -0.959    | 0.0041          |
| 370 | DESOXIMETASONE                                                                                                   | NIH     | 5        | B   | 8      | -0.052    | 0.5611          |
| 371 | DEXCHLORPHENIRAMINE MALEATE                                                                                      | NIH     | 5        | C   | 8      | -0.235    | -0.1571         |
| 372 | Guanidine, N-cyano-N'-(1,1-dimethylpropyl)-N'-[3-pyridinyl]- [CAS]                                               | NIH     | 5        | D   | 8      | -0.591    | -0.1761         |
| 373 | L-534,247                                                                                                        | NIH     | 5        | E   | 8      | -0.58     | -0.3661         |
| 374 | AM-251                                                                                                           | NIH     | 5        | F   | 8      | -0.194    | 0.11            |
| 375 | HTMT                                                                                                             | NIH     | 5        | G   | 8      | -0.775    | -0.0071         |
| 376 | Benzo[ <i>a</i> ]phenanthridine-10,11-diol, 5,6,8a,7,8,12b-hexahydro-, trans- [CAS]                              | NIH     | 5        | H   | 8      | -0.389    | -1.6691         |
| 377 | Methanesulfonamide, N-[4-[[1-[2-(6-methyl-2-pyridinyl)ethyl]-4-piperidinyl]carbonyl]phenyl]-, dihydrochloride [C | NIH     | 5        | A   | 9      | -0.417    | 0.3441          |
| 378 | 2H-Indol-2-one, 1,3-dihydro-1-phenyl-3,3-bis(4-pyridinylmethyl)- [CAS]                                           | NIH     | 5        | B   | 9      | -0.134    | 0.0581          |
| 379 | Beclometasone                                                                                                    | NIH     | 5        | C   | 9      | 0.647     | 0.0071          |
| 380 | OMEPRAZOLE                                                                                                       | NIH     | 5        | D   | 9      | -0.399    | -0.1161         |
| 381 | DOLASETRON MESYLATE                                                                                              | NIH     | 5        | E   | 9      | -0.254    | 0.0271          |
| 382 | Zolmitriptan                                                                                                     | NIH     | 5        | F   | 9      | -0.342    | -0.3711         |
| 383 | TREMULACIN                                                                                                       | NIH     | 5        | G   | 9      | 0.255     | -1.0821         |
| 384 | DACTINOMYCIN                                                                                                     | NIH     | 5        | H   | 9      | 2.787     | -4.5671         |
| 385 | Tramadol                                                                                                         | NIH     | 5        | A   | 10     | -0.609    | 0.5321          |
| 386 | CHLORDIAZEPOXIDE                                                                                                 | NIH     | 5        | B   | 10     | 0.03      | 0.21            |
| 387 | CEFIXIME TRIHYDRATE                                                                                              | NIH     | 5        | C   | 10     | -0.103    | -0.0441         |
| 388 | CEFDINIR                                                                                                         | NIH     | 5        | D   | 10     | 0.083     | -0.3451         |
| 389 | LOFEXIDINE HCl                                                                                                   | NIH     | 5        | E   | 10     | -0.433    | -0.2651         |
| 390 | BALSALAZIDE                                                                                                      | NIH     | 5        | F   | 10     | -0.094    | -0.2871         |
| 391 | OLOPATADINE HCl                                                                                                  | NIH     | 5        | G   | 10     | -0.543    | -0.1151         |
| 392 | ITAVASTATIN Ca                                                                                                   | NIH     | 5        | H   | 10     | 2.343     | -4.4791         |
| 393 | CORTISONE                                                                                                        | NIH     | 5        | A   | 11     | -0.306    | 0.5631          |
| 394 | CYPROHEPTADINE HYDROCHLORIDE                                                                                     | NIH     | 5        | B   | 11     | 0.423     | 0.4591          |
| 395 | HOMOHARRINGTONINE                                                                                                | NIH     | 5        | C   | 11     | 2.423     | -4.0841         |
| 396 | CORTICOSTERONE                                                                                                   | NIH     | 5        | D   | 11     | 0.431     | 0.7721          |
| 397 | DECURONIUM BROMIDE                                                                                               | NIH     | 5        | E   | 11     | 0.518     | 0.4731          |
| 398 | TIBOLONE                                                                                                         | NIH     | 5        | F   | 11     | -0.208    | 0.9111          |
| 399 | NICOTINAMIDE                                                                                                     | NIH     | 5        | G   | 11     | -0.41     | 0.9271          |
| 400 | NIALAMIDE                                                                                                        | NIH     | 5        | H   | 11     | -0.975    | 0.6871          |
| 401 | VINDESINE SULFATE                                                                                                | NIH     | 5        | A   | 2      | 0.463     | -0.6441         |
| 402 | VINCORISTINE SULFATE                                                                                             | NIH     | 5        | B   | 2      | 0.664     | -1.0071         |
| 403 | LACIPRINE                                                                                                        | NIH     | 5        | C   | 2      | 0.293     | 0.8191          |
| 404 | MIRTAZAPINE                                                                                                      | NIH     | 5        | D   | 2      | 0.316     | 0.7671          |
| 405 | AMPIROXICAM                                                                                                      | NIH     | 5        | E   | 2      | 0.324     | 1.1761          |
| 406 | GLIMEPIRIDE                                                                                                      | NIH     | 5        | F   | 2      | 0.461     | 0.3491          |
| 407 | AMLODIPINE BASE                                                                                                  | NIH     | 5        | G   | 2      | 0.775     | 1.1181          |
| 408 | RABEPRAZOLE                                                                                                      | NIH     | 5        | H   | 2      | -0.652    | 0.72            |
| 409 | CLOFAZIMINE                                                                                                      | NIH     | 5        | A   | 3      | -0.36     | -0.1961         |
| 410 | IRINOTECAN HCl (trihydrate)                                                                                      | NIH     | 5        | B   | 3      | -0.173    | 0.2291          |
| 411 | LANSOPRAZOLE                                                                                                     | NIH     | 5        | C   | 3      | -0.272    | -0.6541         |
| 412 | 8-Chloro-11-piperidin-4-ylidene-6,11-dihydro-5H-benzo[5,6]cyclohepta[1,2-b]pyridine                              | NIH     | 5        | D   | 3      | 0.067     | -0.5311         |
| 413 | 1,3,5-[10]-ESTYRARIEN-3-OL-17-ONE SULPHATE, SODIUM SALT                                                          | NIH     | 5        | E   | 3      | -0.242    | 0.4861          |
| 414 | MIFEPRISTONE                                                                                                     | NIH     | 5        | F   | 3      | 0.693     | 0.6661          |
| 415 | Etoposide                                                                                                        | NIH     | 5        | G   | 3      | -0.245    | 0.2241          |
| 416 | Sibutramine                                                                                                      | NIH     | 5        | H   | 3      | -1.689    | 0.7991          |
| 417 | Clobenpropit                                                                                                     | NIH     | 5        | A   | 4      | -1.079    | 0.2831          |
| 418 | HUPERZINE A                                                                                                      | NIH     | 5        | B   | 4      | -0.479    | -0.0881         |
| 419 | SIBUTRAMINE HCl                                                                                                  | NIH     | 5        | C   | 4      | -0.092    | -0.1751         |
| 420 | Lorazepam                                                                                                        | NIH     | 5        | D   | 4      | -0.075    | 0.6831          |

SUPPLEMENTARY DATA

|     | Name                                                                                                              | Library  | Plate No | Row | Column | ROS score | viability score |
|-----|-------------------------------------------------------------------------------------------------------------------|----------|----------|-----|--------|-----------|-----------------|
| 421 | 8-Azaspiro[4.5]decan-7,9-dione, 8-[2-((2,3-dihydro-1,4-benzodioxin-2-yl)methyl)amino]ethyl-, monomethanesulfonate | NIH      | 6        | E   | 4      | -0.049    | 0.836           |
| 422 | Adenoaine, N-(2-hydroxycyclopentyl)-, (1S-trans)- [CAS]                                                           | NIH      | 6        | F   | 4      | -0.435    | -0.545          |
| 423 | AMIODARONE HYDROCHLORIDE                                                                                          | NIH      | 6        | G   | 4      | -0.291    | 0.075           |
| 424 | mevastatin                                                                                                        | NIH      | 6        | H   | 4      | 2.397     | -7.257          |
| 425 | IMATINIB MESYLATE                                                                                                 | NIH      | 6        | A   | 5      | -0.767    | 0.902           |
| 426 | Matylperon                                                                                                        | NIH      | 6        | B   | 5      | -0.445    | 0.566           |
| 427 | PARECOXIB Na                                                                                                      | NIH      | 6        | C   | 5      | -0.756    | 0.135           |
| 428 | PERGOLIDE MESYLATE SALT                                                                                           | NIH      | 6        | D   | 5      | -0.459    | -0.687          |
| 429 | ATRACURIUM BESYLATE                                                                                               | NIH      | 6        | E   | 5      | -0.353    | -0.096          |
| 430 | ARTEMETHER                                                                                                        | NIH      | 6        | F   | 5      | 0.545     | -0.136          |
| 431 | EBSELEN                                                                                                           | NIH      | 6        | G   | 5      | -0.753    | 0.129           |
| 432 | CGS 120668                                                                                                        | NIH      | 6        | H   | 5      | -0.795    | -0.099          |
| 433 | TELITHROMYCIN                                                                                                     | NIH      | 6        | A   | 6      | -0.313    | -0.077          |
| 434 | CCPA                                                                                                              | NIH      | 6        | B   | 6      | -0.163    | -0.369          |
| 435 | PD 81723                                                                                                          | NIH      | 6        | C   | 6      | -0.402    | -0.356          |
| 436 | Stanozolol                                                                                                        | NIH      | 6        | D   | 6      | 0.318     | -1.08           |
| 437 | Zaleplon                                                                                                          | NIH      | 6        | E   | 6      | -0.264    | -0.365          |
| 438 | Prostaglandin E1                                                                                                  | NIH      | 6        | F   | 6      | 0.513     | -0.344          |
| 439 | Testosterone                                                                                                      | NIH      | 6        | G   | 6      | -0.242    | -0.534          |
| 440 | DEHYDROEPIANDROSTERONE                                                                                            | NIH      | 6        | H   | 6      | -0.712    | -0.078          |
| 441 | SDM25N                                                                                                            | NIH      | 6        | A   | 7      | -0.026    | 0.322           |
| 442 | Thiophene, 5-bromo-2-[4-(fluorophenyl)-3-[4-(methylsulfonyl)phenyl]-] [CAS]                                       | NIH      | 6        | B   | 7      | 0.18      | 0.165           |
| 443 | 5-Nonyloxytryptamine                                                                                              | NIH      | 6        | C   | 7      | -0.032    | 0.21            |
| 444 | Salmeterol                                                                                                        | NIH      | 6        | D   | 7      | -0.158    | -0.096          |
| 445 | SB 205607                                                                                                         | NIH      | 6        | E   | 7      | 0.67      | 0.061           |
| 446 | R(-)-SCH-23350 hydrochloride                                                                                      | NIH      | 6        | F   | 7      | 0.01      | -0.805          |
| 447 | Moroxydine HCl                                                                                                    | ENZO FDA | 1        | A   | 2      | -1.072    | -1.079          |
| 448 | Spectinomycin                                                                                                     | ENZO FDA | 1        | B   | 2      | 0.477     | 0.096           |
| 449 | Phentolamine                                                                                                      | ENZO FDA | 1        | C   | 2      | 0.261     | -0.251          |
| 450 | Oxymetazoline                                                                                                     | ENZO FDA | 1        | D   | 2      | -0.021    | -0.53           |
| 451 | Nicergoline                                                                                                       | ENZO FDA | 1        | E   | 2      | -0.587    | 0.245           |
| 452 | Cimaterol                                                                                                         | ENZO FDA | 1        | F   | 2      | -0.692    | 0.856           |
| 453 | Telenzapine                                                                                                       | ENZO FDA | 1        | G   | 2      | -0.382    | 0.561           |
| 454 | Cimetidine                                                                                                        | ENZO FDA | 1        | H   | 2      | -2.36     | 0.442           |
| 455 | Clindamycin                                                                                                       | ENZO FDA | 1        | A   | 3      | -1.531    | -1.816          |
| 456 | Bepiridil                                                                                                         | ENZO FDA | 1        | B   | 3      | -0.383    | -0.818          |
| 457 | QUININE                                                                                                           | ENZO FDA | 1        | C   | 3      | -0.508    | -0.324          |
| 458 | Ifenprodil                                                                                                        | ENZO FDA | 1        | D   | 3      | 0.46      | 0.024           |
| 459 | Emitricitabine                                                                                                    | ENZO FDA | 1        | E   | 3      | 0.359     | -0.381          |
| 460 | Dobutamine                                                                                                        | ENZO FDA | 1        | F   | 3      | 0.524     | 0.15            |
| 461 | Tropicamide                                                                                                       | ENZO FDA | 1        | G   | 3      | 0.179     | 0.394           |
| 462 | Tiotidine                                                                                                         | ENZO FDA | 1        | H   | 3      | -0.746    | 0.687           |
| 463 | Clindamycin palmitate                                                                                             | ENZO FDA | 1        | A   | 4      | -1.161    | -0.442          |
| 464 | Amlodiarone                                                                                                       | ENZO FDA | 1        | B   | 4      | 0.668     | -0.573          |
| 465 | Flufenamic acid                                                                                                   | ENZO FDA | 1        | C   | 4      | -0.152    | 0.961           |
| 466 | Nafopidil                                                                                                         | ENZO FDA | 1        | D   | 4      | 0.622     | 0.725           |
| 467 | Betaxolol                                                                                                         | ENZO FDA | 1        | E   | 4      | 0.605     | 1.662           |
| 468 | Pronethalol                                                                                                       | ENZO FDA | 1        | F   | 4      | 0.338     | 1.533           |
| 469 | Pancuronium                                                                                                       | ENZO FDA | 1        | G   | 4      | 0.073     | 0.887           |
| 470 | Zonisamide                                                                                                        | ENZO FDA | 1        | H   | 4      | -1.269    | 0.414           |
| 471 | Cyclosporin A                                                                                                     | ENZO FDA | 1        | A   | 5      | -1.045    | -2.347          |
| 472 | Nitcardipine                                                                                                      | ENZO FDA | 1        | B   | 5      | 0.296     | -0.709          |
| 473 | Propafenone                                                                                                       | ENZO FDA | 1        | C   | 5      | -0.314    | 0.02            |
| 474 | Prazaein                                                                                                          | ENZO FDA | 1        | D   | 5      | 1.247     | 0.316           |
| 475 | Practolol                                                                                                         | ENZO FDA | 1        | E   | 5      | 0.538     | 0.272           |
| 476 | Sotalol                                                                                                           | ENZO FDA | 1        | F   | 5      | 0.339     | 0.464           |
| 477 | Ivermectin                                                                                                        | ENZO FDA | 1        | G   | 5      | 1.032     | 1.038           |
| 478 | Zoledronic acid                                                                                                   | ENZO FDA | 1        | H   | 5      | -0.703    | 0.361           |
| 479 | Kasugamycin                                                                                                       | ENZO FDA | 1        | A   | 6      | -0.407    | -0.817          |
| 480 | Pimozide                                                                                                          | ENZO FDA | 1        | B   | 6      | 0.706     | 0.533           |
| 481 | Phenytolol                                                                                                        | ENZO FDA | 1        | C   | 6      | 0.154     | 0.482           |
| 482 | Clonidine HCl                                                                                                     | ENZO FDA | 1        | D   | 6      | -0.271    | 1.108           |
| 483 | Timolol (S)                                                                                                       | ENZO FDA | 1        | E   | 6      | 0.957     | 0.947           |
| 484 | Maprotiline                                                                                                       | ENZO FDA | 1        | F   | 6      | 0.234     | 0.473           |
| 485 | Physostigmine                                                                                                     | ENZO FDA | 1        | G   | 6      | -0.461    | 1.247           |
| 486 | Naltrexone                                                                                                        | ENZO FDA | 1        | H   | 6      | -1.386    | 0.591           |
| 487 | Lincomycin                                                                                                        | ENZO FDA | 1        | A   | 7      | -0.978    | -0.869          |
| 488 | Loperamide                                                                                                        | ENZO FDA | 1        | B   | 7      | 0.328     | -0.081          |
| 489 | Procalnamide                                                                                                      | ENZO FDA | 1        | C   | 7      | -0.289    | 0.261           |
| 490 | Guanabenz                                                                                                         | ENZO FDA | 1        | D   | 7      | 0.316     | 0.538           |
| 491 | Xamoterol                                                                                                         | ENZO FDA | 1        | E   | 7      | -0.007    | 0.747           |
| 492 | Nisoxetine                                                                                                        | ENZO FDA | 1        | F   | 7      | 0.621     | 0.63            |
| 493 | Nivalamide                                                                                                        | ENZO FDA | 1        | G   | 7      | -0.025    | 0.621           |
| 494 | Zolmitriptan                                                                                                      | ENZO FDA | 1        | H   | 7      | -1.324    | 1.6             |
| 495 | Lomofungin                                                                                                        | ENZO FDA | 1        | A   | 8      | -1.001    | -2.486          |
| 496 | Fluspirilene                                                                                                      | ENZO FDA | 1        | B   | 8      | 0.563     | -1.145          |
| 497 | Lidocaine                                                                                                         | ENZO FDA | 1        | C   | 8      | 0.411     | 0.57            |
| 498 | Rilmenidine                                                                                                       | ENZO FDA | 1        | D   | 8      | 0.707     | 0.918           |
| 499 | Clenbuterol                                                                                                       | ENZO FDA | 1        | E   | 8      | 0.3       | 1.341           |
| 500 | Canthaxanthin                                                                                                     | ENZO FDA | 1        | F   | 8      | 0.721     | 1.078           |
| 501 | Haloperidol                                                                                                       | ENZO FDA | 1        | G   | 8      | 0.128     | 0.803           |
| 502 | Memantine                                                                                                         | ENZO FDA | 1        | H   | 8      | -0.562    | 0.319           |
| 503 | Mycophenolic Acid                                                                                                 | ENZO FDA | 1        | A   | 9      | -0.467    | -3.08           |
| 504 | Tolbutamide                                                                                                       | ENZO FDA | 1        | B   | 9      | -0.27     | 0.635           |
| 505 | Fiscalmid                                                                                                         | ENZO FDA | 1        | C   | 9      | 0.871     | 0.654           |
| 506 | Spiroxatrine                                                                                                      | ENZO FDA | 1        | D   | 9      | 0.884     | 0.538           |
| 507 | Procaterol                                                                                                        | ENZO FDA | 1        | E   | 9      | -0.837    | 0.135           |
| 508 | Pilocarpine                                                                                                       | ENZO FDA | 1        | F   | 9      | 0.859     | -0.203          |
| 509 | Piribedil                                                                                                         | ENZO FDA | 1        | G   | 9      | 0.166     | 0.077           |
| 510 | Aniracetam                                                                                                        | ENZO FDA | 1        | H   | 9      | -0.259    | -0.655          |
| 511 | Novoblocln                                                                                                        | ENZO FDA | 1        | A   | 10     | -0.246    | -0.842          |
| 512 | Pinacidil                                                                                                         | ENZO FDA | 1        | B   | 10     | -0.185    | -0.005          |
| 513 | Phenamil                                                                                                          | ENZO FDA | 1        | C   | 10     | 0.843     | 0.323           |
| 514 | Yohimbine HCl                                                                                                     | ENZO FDA | 1        | D   | 10     | 0.866     | 0.052           |
| 515 | Salbutamol                                                                                                        | ENZO FDA | 1        | E   | 10     | 0.213     | 0.568           |
| 516 | Ipratropium                                                                                                       | ENZO FDA | 1        | F   | 10     | 0.264     | 0.762           |
| 517 | Mepyrmine                                                                                                         | ENZO FDA | 1        | G   | 10     | -0.581    | -0.349          |
| 518 | Riluzole                                                                                                          | ENZO FDA | 1        | H   | 10     | -0.965    | -0.301          |
| 519 | Rapamycin                                                                                                         | ENZO FDA | 1        | A   | 11     | -0.341    | -3.217          |



SUPPLEMENTARY DATA

|     | Name                               | Library  | Plate No | Row | Column | ROS score | viability score |
|-----|------------------------------------|----------|----------|-----|--------|-----------|-----------------|
| 520 | Gilgitzide                         | ENZO FDA | 1        | B   | 11     | 0.654     | -0.616          |
| 521 | Cirazoline                         | ENZO FDA | 1        | C   | 11     | 0.68      | -1.461          |
| 522 | Dihydroergotamine                  | ENZO FDA | 1        | D   | 11     | 0.727     | -1.473          |
| 523 | Pindolol                           | ENZO FDA | 1        | E   | 11     | 0.094     | -1.539          |
| 524 | Pirnzepine                         | ENZO FDA | 1        | F   | 11     | 0.385     | -0.779          |
| 525 | Trans-riprolidine                  | ENZO FDA | 1        | G   | 11     | -0.084    | -0.642          |
| 526 | Propofol                           | ENZO FDA | 1        | H   | 11     | -1.005    | -1.038          |
| 527 | Mianserin                          | ENZO FDA | 2        | A   | 2      | -0.774    | -0.552          |
| 528 | Strychnine                         | ENZO FDA | 2        | B   | 2      | 0.232     | 0.751           |
| 529 | Sulpiride S (-)                    | ENZO FDA | 2        | C   | 2      | 0.228     | 0.57            |
| 530 | Quetiapine Fumarate                | ENZO FDA | 2        | D   | 2      | 0.666     | 0.98            |
| 531 | Nalbuphine                         | ENZO FDA | 2        | E   | 2      | 0.233     | 1.087           |
| 532 | Vardenafil                         | ENZO FDA | 2        | F   | 2      | 0.074     | 1.342           |
| 533 | Olanzapine                         | ENZO FDA | 2        | G   | 2      | -1.472    | 0.878           |
| 534 | Butenafine                         | ENZO FDA | 2        | H   | 2      | -1.686    | 0.536           |
| 535 | Aminophylline                      | ENZO FDA | 2        | A   | 3      | -1.427    | -1.06           |
| 536 | Tubocurarine (+)                   | ENZO FDA | 2        | B   | 3      | 0.465     | 0.1             |
| 537 | Diphenhydramine                    | ENZO FDA | 2        | C   | 3      | 0.966     | 0.475           |
| 538 | Alprenolol                         | ENZO FDA | 2        | D   | 3      | 1.068     | 0.665           |
| 539 | Carbamylcholine                    | ENZO FDA | 2        | E   | 3      | -0.125    | 0.443           |
| 540 | Linazolid                          | ENZO FDA | 2        | F   | 3      | 1.295     | 1.027           |
| 541 | Loxastatin                         | ENZO FDA | 2        | G   | 3      | 2.044     | -5.774          |
| 542 | Dorzolamide                        | ENZO FDA | 2        | H   | 3      | -1.439    | 1.171           |
| 543 | Furafylline                        | ENZO FDA | 2        | A   | 4      | 0.242     | -0.984          |
| 544 | Butaclamol (+)                     | ENZO FDA | 2        | B   | 4      | -0.351    | -0.009          |
| 545 | Promethazine                       | ENZO FDA | 2        | C   | 4      | 1.075     | 0.156           |
| 546 | Imipramine                         | ENZO FDA | 2        | D   | 4      | 1.216     | -0.019          |
| 547 | Carbamyl-beta-methylcholine        | ENZO FDA | 2        | E   | 4      | 1.107     | -1.663          |
| 548 | Docetaxil                          | ENZO FDA | 2        | F   | 4      | 0.905     | -1.498          |
| 549 | Lamotrigine                        | ENZO FDA | 2        | G   | 4      | -1.078    | 0.051           |
| 550 | Ecitalopram                        | ENZO FDA | 2        | H   | 4      | -2.692    | -0.153          |
| 551 | Nataglitide                        | ENZO FDA | 2        | A   | 5      | -0.248    | -1.111          |
| 552 | Apomorphine R (-)                  | ENZO FDA | 2        | B   | 5      | 0.065     | 0.366           |
| 553 | Ranitidine                         | ENZO FDA | 2        | C   | 5      | 0.479     | 0.494           |
| 554 | Amoxapine                          | ENZO FDA | 2        | D   | 5      | 1.345     | 0.218           |
| 555 | Butyrylcholine                     | ENZO FDA | 2        | E   | 5      | -0.241    | 1.048           |
| 556 | Olopatadine                        | ENZO FDA | 2        | F   | 5      | -0.023    | 0.839           |
| 557 | Ractopamine                        | ENZO FDA | 2        | G   | 5      | -0.279    | 0.679           |
| 558 | Eprosartan                         | ENZO FDA | 2        | H   | 5      | -1.465    | 0.039           |
| 559 | Isoproterenol (Rac)                | ENZO FDA | 2        | A   | 6      | -0.986    | -0.154          |
| 560 | Chlorpromazine                     | ENZO FDA | 2        | B   | 6      | -0.283    | 0.335           |
| 561 | Naltindole                         | ENZO FDA | 2        | C   | 6      | -0.864    | 0.352           |
| 562 | Mesulergine                        | ENZO FDA | 2        | D   | 6      | 0.991     | 0.272           |
| 563 | FAMOTIDINE                         | ENZO FDA | 2        | E   | 6      | 0.002     | 0.272           |
| 564 | Manidipine                         | ENZO FDA | 2        | F   | 6      | 1.238     | 1.89            |
| 565 | Sildenafil                         | ENZO FDA | 2        | G   | 6      | -0.306    | 0.673           |
| 566 | Sodium Phenylacetate               | ENZO FDA | 2        | H   | 6      | -1.579    | 0.444           |
| 567 | Acetylcholine                      | ENZO FDA | 2        | A   | 7      | 0.35      | -0.799          |
| 568 | Domperidone                        | ENZO FDA | 2        | B   | 7      | -0.045    | 0.253           |
| 569 | Idazoxan                           | ENZO FDA | 2        | C   | 7      | 0.472     | 0.04            |
| 570 | Amfebutamone                       | ENZO FDA | 2        | D   | 7      | -0.023    | 0.196           |
| 571 | Terfenadine                        | ENZO FDA | 2        | E   | 7      | 0.88      | -0.443          |
| 572 | Tolcapone                          | ENZO FDA | 2        | F   | 7      | 0.769     | 0.416           |
| 573 | Atovaquone                         | ENZO FDA | 2        | G   | 7      | -0.022    | 1.147           |
| 574 | Ozagrel                            | ENZO FDA | 2        | H   | 7      | -1.132    | -0.534          |
| 575 | Atropine                           | ENZO FDA | 2        | A   | 8      | -1.324    | -0.418          |
| 576 | Fluphenazine                       | ENZO FDA | 2        | B   | 8      | -0.352    | 0.708           |
| 577 | Spiperone                          | ENZO FDA | 2        | C   | 8      | -0.604    | 0.291           |
| 578 | Metoclopramide                     | ENZO FDA | 2        | D   | 8      | 0.793     | 0.55            |
| 579 | Isoniazid                          | ENZO FDA | 2        | E   | 8      | 0.34      | 1.304           |
| 580 | Gestronone                         | ENZO FDA | 2        | F   | 8      | 0.745     | 0.319           |
| 581 | Sertaconazole                      | ENZO FDA | 2        | G   | 8      | 0.285     | 0.048           |
| 582 | Entacapone                         | ENZO FDA | 2        | H   | 8      | -1.719    | -0.65           |
| 583 | Dacamethonium                      | ENZO FDA | 2        | A   | 9      | -0.736    | -1.726          |
| 584 | Pergolide                          | ENZO FDA | 2        | B   | 9      | -0.155    | -0.293          |
| 585 | Epinephrine-(+)-L (-)              | ENZO FDA | 2        | C   | 9      | 0.107     | -0.615          |
| 586 | Naltinben methanesulfonate hydrate | ENZO FDA | 2        | D   | 9      | -0.553    | -0.222          |
| 587 | Ticlopidine                        | ENZO FDA | 2        | E   | 9      | 0.717     | 0.455           |
| 588 | Olmesartan                         | ENZO FDA | 2        | F   | 9      | 0.33      | -0.204          |
| 589 | Cefepime                           | ENZO FDA | 2        | G   | 9      | 0.315     | 0.255           |
| 590 | Bleomycin                          | ENZO FDA | 2        | H   | 9      | -1.517    | -0.251          |
| 591 | Mecamylamine                       | ENZO FDA | 2        | A   | 10     | -1.384    | -1.029          |
| 592 | Raclopride S(-)                    | ENZO FDA | 2        | B   | 10     | -0.263    | -0.237          |
| 593 | Xylazine                           | ENZO FDA | 2        | C   | 10     | 1.069     | 0.332           |
| 594 | Vitamin A acetate                  | ENZO FDA | 2        | D   | 10     | 0.991     | -0.326          |
| 595 | Amorolfine                         | ENZO FDA | 2        | E   | 10     | 0.234     | 0.855           |
| 596 | Nilvadipine                        | ENZO FDA | 2        | F   | 10     | -0.535    | 1.112           |
| 597 | Aripiprazole                       | ENZO FDA | 2        | G   | 10     | 0.137     | 0.25            |
| 598 | Bopindolol                         | ENZO FDA | 2        | H   | 10     | -1.227    | -0.818          |
| 599 | Neostigmine                        | ENZO FDA | 2        | A   | 11     | 0.499     | -1.787          |
| 600 | Risperidone                        | ENZO FDA | 2        | B   | 11     | -0.082    | -0.471          |
| 601 | Norepinephrine-(+)-tartrate L (-)  | ENZO FDA | 2        | C   | 11     | 0.156     | -1.018          |
| 602 | Levamisole                         | ENZO FDA | 2        | D   | 11     | 0.19      | -0.766          |
| 603 | Clemastine                         | ENZO FDA | 2        | E   | 11     | 0.481     | -0.477          |
| 604 | Lacidipine                         | ENZO FDA | 2        | F   | 11     | 0.097     | 0.604           |
| 605 | Candesartan                        | ENZO FDA | 2        | G   | 11     | 0.476     | -0.323          |
| 606 | Guanfacine                         | ENZO FDA | 2        | H   | 11     | -0.227    | -0.906          |
| 607 | Tizanidine                         | ENZO FDA | 3        | A   | 2      | -1.279    | -0.153          |
| 608 | Imatinib                           | ENZO FDA | 3        | B   | 2      | -0.132    | 0.434           |
| 609 | Dofetilide                         | ENZO FDA | 3        | C   | 2      | -0.999    | 0.488           |
| 610 | Galanthamine                       | ENZO FDA | 3        | D   | 2      | -0.25     | 0.324           |
| 611 | Gabapentin                         | ENZO FDA | 3        | E   | 2      | -0.532    | 0.441           |
| 612 | Molsidomine                        | ENZO FDA | 3        | F   | 2      | -0.209    | 0.589           |
| 613 | Calcitriol                         | ENZO FDA | 3        | G   | 2      | -0.497    | 0.583           |
| 614 | Citricrate                         | ENZO FDA | 3        | H   | 2      | -1.032    | 0.768           |
| 615 | Meglumine                          | ENZO FDA | 3        | A   | 3      | -0.742    | -0.23           |
| 616 | Idarubicin                         | ENZO FDA | 3        | B   | 3      | 1.415     | -4.998          |
| 617 | Eriofinib                          | ENZO FDA | 3        | C   | 3      | 0.009     | 0.129           |

SUPPLEMENTARY DATA

|     | Name                  | Library  | Plate No | Row | Column | ROS score | viability score |
|-----|-----------------------|----------|----------|-----|--------|-----------|-----------------|
| 618 | Amloride              | ENZO FDA | 3        | D   | 3      | -0.079    | 0.167           |
| 619 | Felodipine            | ENZO FDA | 3        | E   | 3      | 0.871     | 0.697           |
| 620 | Pravastatin           | ENZO FDA | 3        | F   | 3      | 0.212     | 0.659           |
| 621 | Ketoconazole          | ENZO FDA | 3        | G   | 3      | 0.452     | 0.208           |
| 622 | Ibuprofen             | ENZO FDA | 3        | H   | 3      | -1.707    | 0.028           |
| 623 | Propranolol (-)       | ENZO FDA | 3        | A   | 4      | -0.565    | -0.066          |
| 624 | Montelukast           | ENZO FDA | 3        | B   | 4      | 0.505     | 0.14            |
| 625 | Lobeline              | ENZO FDA | 3        | C   | 4      | -0.169    | 0.213           |
| 626 | Amlodipine            | ENZO FDA | 3        | D   | 4      | 0.067     | 0.122           |
| 627 | Cilnidipine           | ENZO FDA | 3        | E   | 4      | -0.137    | 1.834           |
| 628 | Tranilast             | ENZO FDA | 3        | F   | 4      | 0.344     | 0.423           |
| 629 | Oxatomide             | ENZO FDA | 3        | G   | 4      | 0.284     | 0.354           |
| 630 | Benzazepine           | ENZO FDA | 3        | H   | 4      | -0.886    | 0.384           |
| 631 | Carvedilol            | ENZO FDA | 3        | A   | 5      | -1.157    | -0.11           |
| 632 | Depranil HCl          | ENZO FDA | 3        | B   | 5      | -0.307    | 0.348           |
| 633 | Melatonin             | ENZO FDA | 3        | C   | 5      | 0.256     | 0.465           |
| 634 | Diltiazem             | ENZO FDA | 3        | D   | 5      | -0.179    | 0.025           |
| 635 | Phenoxybenzamine HCl  | ENZO FDA | 3        | E   | 5      | 0.392     | 0.18            |
| 636 | Shikolin              | ENZO FDA | 3        | F   | 5      | 0.201     | -1.968          |
| 637 | Diaodium Cromoglycate | ENZO FDA | 3        | G   | 5      | 0.227     | 0.384           |
| 638 | Dabirisoquin          | ENZO FDA | 3        | H   | 5      | -1.033    | 0.718           |
| 639 | Carvastatin           | ENZO FDA | 3        | A   | 6      | 1.765     | -4.672          |
| 640 | Vatalanib             | ENZO FDA | 3        | B   | 6      | 0.071     | -0.121          |
| 641 | Dinoprost             | ENZO FDA | 3        | C   | 6      | 0.42      | -0.146          |
| 642 | Nifedipine            | ENZO FDA | 3        | D   | 6      | 0.287     | 0.027           |
| 643 | Trifluoperazine 2HCl  | ENZO FDA | 3        | E   | 6      | 0.142     | -0.717          |
| 644 | Bromocriptine         | ENZO FDA | 3        | F   | 6      | 0.096     | -0.162          |
| 645 | Capsaicin             | ENZO FDA | 3        | G   | 6      | 0.183     | -0.284          |
| 646 | Methiothepin          | ENZO FDA | 3        | H   | 6      | -0.978    | -0.115          |
| 647 | Aciclovir             | ENZO FDA | 3        | A   | 7      | 1.416     | -3.286          |
| 648 | Fumagillin            | ENZO FDA | 3        | B   | 7      | 0.288     | 0.473           |
| 649 | HA1077                | ENZO FDA | 3        | C   | 7      | 0.177     | -0.161          |
| 650 | Nimodipine            | ENZO FDA | 3        | D   | 7      | 0.495     | -0.015          |
| 651 | Denbutylline          | ENZO FDA | 3        | E   | 7      | 0.273     | 0.264           |
| 652 | Clozapine             | ENZO FDA | 3        | F   | 7      | -0.1      | 0.463           |
| 653 | Dexamethasone         | ENZO FDA | 3        | G   | 7      | -0.259    | -1.175          |
| 654 | Bumetanide            | ENZO FDA | 3        | H   | 7      | -0.514    | -0.152          |
| 655 | Flumazenil            | ENZO FDA | 3        | A   | 8      | -0.31     | -0.44           |
| 656 | Efaroxan              | ENZO FDA | 3        | B   | 8      | -0.323    | 0.163           |
| 657 | Hydroxyvitacrine      | ENZO FDA | 3        | C   | 8      | -0.293    | 0.048           |
| 658 | Nitrendipine          | ENZO FDA | 3        | D   | 8      | 0.386     | -0.114          |
| 659 | Miltefosine           | ENZO FDA | 3        | E   | 8      | 0.073     | 0.632           |
| 660 | Clothiapine           | ENZO FDA | 3        | F   | 8      | 0.886     | 0.502           |
| 661 | Dipyridamole          | ENZO FDA | 3        | G   | 8      | 0.208     | 0.24            |
| 662 | Neomycin              | ENZO FDA | 3        | H   | 8      | -0.886    | 0.566           |
| 663 | Fenretinide           | ENZO FDA | 3        | A   | 9      | 0.066     | -0.411          |
| 664 | Dinoprostone          | ENZO FDA | 3        | B   | 9      | 0.302     | 0.409           |
| 665 | Oxotremorine          | ENZO FDA | 3        | C   | 9      | 0.067     | -0.149          |
| 666 | Verapamil             | ENZO FDA | 3        | D   | 9      | 0.072     | -0.05           |
| 667 | Latanoiprost          | ENZO FDA | 3        | E   | 9      | 0.365     | 0.169           |
| 668 | QUINPROLE (-)         | ENZO FDA | 3        | F   | 9      | 0.558     | 0.054           |
| 669 | Ethacrynic Acid       | ENZO FDA | 3        | G   | 9      | -0.407    | 0.485           |
| 670 | Auranofin             | ENZO FDA | 3        | H   | 9      | -0.179    | -0.7            |
| 671 | Gefitinib             | ENZO FDA | 3        | A   | 10     | -0.058    | 0.686           |
| 672 | Metformin             | ENZO FDA | 3        | B   | 10     | -0.134    | 0.268           |
| 673 | Tacrine               | ENZO FDA | 3        | C   | 10     | 0.529     | 0.38            |
| 674 | Niguldipine           | ENZO FDA | 3        | D   | 10     | 1.011     | -0.201          |
| 675 | Ouabain               | ENZO FDA | 3        | E   | 10     | 0.143     | 0.516           |
| 676 | Remoxipride           | ENZO FDA | 3        | F   | 10     | -0.054    | 0.945           |
| 677 | Indomethacin          | ENZO FDA | 3        | G   | 10     | -0.512    | 0.883           |
| 678 | Captopril             | ENZO FDA | 3        | H   | 10     | -0.586    | 0.793           |
| 679 | Ibudilast             | ENZO FDA | 3        | A   | 11     | -0.327    | -0.277          |
| 680 | Anagrelide            | ENZO FDA | 3        | B   | 11     | 0.185     | 0.005           |
| 681 | Gallamine             | ENZO FDA | 3        | C   | 11     | -0.078    | -0.097          |
| 682 | Flunarizine 2HCl      | ENZO FDA | 3        | D   | 11     | 0.231     | -0.302          |
| 683 | Clopidogrel           | ENZO FDA | 3        | E   | 11     | -0.102    | -0.298          |
| 684 | Calcitriol            | ENZO FDA | 3        | F   | 11     | 0.345     | 0.817           |
| 685 | Naproxen              | ENZO FDA | 3        | G   | 11     | 0.094     | 0.32            |
| 686 | Docosahexaenoic acid  | ENZO FDA | 3        | H   | 11     | -0.905    | 0.327           |
| 687 | Tranylcypromine       | ENZO FDA | 4        | A   | 2      | -0.902    | -0.296          |
| 688 | Ergothioneine         | ENZO FDA | 4        | B   | 2      | -0.199    | 0.108           |
| 689 | Bezafibrate           | ENZO FDA | 4        | C   | 2      | -0.234    | 0.213           |
| 690 | Dauvorubicin          | ENZO FDA | 4        | D   | 2      | 1.338     | -2.982          |
| 691 | Sulindac              | ENZO FDA | 4        | E   | 2      | -0.638    | 0.309           |
| 692 | Diazoxide             | ENZO FDA | 4        | F   | 2      | -0.736    | 0.162           |
| 693 | Abamectin             | ENZO FDA | 4        | G   | 2      | -0.551    | 0.658           |
| 694 | Enalaprilat           | ENZO FDA | 4        | H   | 2      | -0.962    | 0.319           |
| 695 | Piroxicam             | ENZO FDA | 4        | A   | 3      | -0.884    | 0.085           |
| 696 | Ambroxol              | ENZO FDA | 4        | B   | 3      | -0.645    | 0.106           |
| 697 | Raloxifene            | ENZO FDA | 4        | C   | 3      | 0.154     | 0.231           |
| 698 | Doxorubicin HCl       | ENZO FDA | 4        | D   | 3      | 1.647     | -2.886          |
| 699 | Valproic acid         | ENZO FDA | 4        | E   | 3      | -0.193    | 0.505           |
| 700 | Glyburide             | ENZO FDA | 4        | F   | 3      | 0.359     | 0.391           |
| 701 | Alfacalcidol          | ENZO FDA | 4        | G   | 3      | -0.505    | 0.466           |
| 702 | Fluvastatin           | ENZO FDA | 4        | H   | 3      | 1.676     | -2.76           |
| 703 | Depranil HCl          | ENZO FDA | 4        | A   | 4      | -0.781    | -0.14           |
| 704 | Idebenone             | ENZO FDA | 4        | B   | 4      | -0.832    | 0.038           |
| 705 | Camptothecin          | ENZO FDA | 4        | C   | 4      | 0.529     | -0.933          |
| 706 | Tanehnone IIA         | ENZO FDA | 4        | D   | 4      | 0.192     | 0.192           |
| 707 | Calcipotriene         | ENZO FDA | 4        | E   | 4      | -0.123    | 0.251           |
| 708 | Minoxidil             | ENZO FDA | 4        | F   | 4      | 0.099     | 0.525           |
| 709 | Anethole-trithione    | ENZO FDA | 4        | G   | 4      | -0.44     | 0.724           |
| 710 | Fosinopril            | ENZO FDA | 4        | H   | 4      | -0.367    | 0.261           |
| 711 | Troleandomycin        | ENZO FDA | 4        | A   | 5      | -1.224    | 0.109           |
| 712 | Mevastatin            | ENZO FDA | 4        | B   | 5      | 2         | -2.841          |
| 713 | Plicamycin            | ENZO FDA | 4        | C   | 5      | 1.917     | -2.37           |
| 714 | Lapatinib             | ENZO FDA | 4        | D   | 5      | 0.119     | 1.545           |

SUPPLEMENTARY DATA

|     | Name                       | Library  | Plate No | Row | Column | ROS score | viability score |
|-----|----------------------------|----------|----------|-----|--------|-----------|-----------------|
| 715 | Zafirlucast                | ENZO FDA | 4        | E   | 5      | 0.679     | 0.585           |
| 716 | Tolazamide                 | ENZO FDA | 4        | F   | 5      | -0.262    | 0.814           |
| 717 | Anastrozole                | ENZO FDA | 4        | G   | 5      | 0.758     | 0.732           |
| 718 | Gemcitabine                | ENZO FDA | 4        | H   | 5      | 0.345     | -1.141          |
| 719 | Carbidopa                  | ENZO FDA | 4        | A   | 6      | -1.051    | 0.044           |
| 720 | Simvastatin                | ENZO FDA | 4        | B   | 6      | 1.905     | -2.709          |
| 721 | Rifampicin                 | ENZO FDA | 4        | C   | 6      | -0.189    | 0.877           |
| 722 | Methyl salicylate          | ENZO FDA | 4        | D   | 6      | 0.451     | 0.771           |
| 723 | Zileuton                   | ENZO FDA | 4        | E   | 6      | 0.229     | 0.432           |
| 724 | Nicorandil                 | ENZO FDA | 4        | F   | 6      | 0.2       | 0.365           |
| 725 | Bicalutamide               | ENZO FDA | 4        | G   | 6      | -0.014    | 0.861           |
| 726 | Ginkgolide A               | ENZO FDA | 4        | H   | 6      | -0.507    | 0.289           |
| 727 | Nimesulide                 | ENZO FDA | 4        | A   | 7      | -0.803    | 0.022           |
| 728 | Suramin                    | ENZO FDA | 4        | B   | 7      | 0.036     | 0.356           |
| 729 | Etoposide                  | ENZO FDA | 4        | C   | 7      | 0.39      | 0.21            |
| 730 | Pioglitazone               | ENZO FDA | 4        | D   | 7      | 0.484     | 0.625           |
| 731 | Pentamidine                | ENZO FDA | 4        | E   | 7      | 0.163     | 0.324           |
| 732 | Bexarotene                 | ENZO FDA | 4        | F   | 7      | 0.607     | 0.501           |
| 733 | Clodronate                 | ENZO FDA | 4        | G   | 7      | -0.482    | 0.468           |
| 734 | Granisetron                | ENZO FDA | 4        | H   | 7      | -1.037    | 0.234           |
| 735 | Ketoprofen                 | ENZO FDA | 4        | A   | 8      | -1.085    | 0.088           |
| 736 | Goserelin                  | ENZO FDA | 4        | B   | 8      | -0.843    | 1.098           |
| 737 | Mitomycin C                | ENZO FDA | 4        | C   | 8      | 1.258     | -1.844          |
| 738 | Pranlukast                 | ENZO FDA | 4        | D   | 8      | -0.222    | 1.077           |
| 739 | Bortezomib                 | ENZO FDA | 4        | E   | 8      | 1.724     | -2.077          |
| 740 | Brometric acid             | ENZO FDA | 4        | F   | 8      | -0.006    | 0.597           |
| 741 | Clindamycin                | ENZO FDA | 4        | G   | 8      | 0.086     | 0.714           |
| 742 | Nedaplatin                 | ENZO FDA | 4        | H   | 8      | -0.383    | 0.369           |
| 743 | Meloxicam                  | ENZO FDA | 4        | A   | 9      | 0.116     | 0.525           |
| 744 | Gualacot                   | ENZO FDA | 4        | B   | 9      | -0.26     | 0.485           |
| 745 | Puromycin                  | ENZO FDA | 4        | C   | 9      | 1.682     | -2.192          |
| 746 | Rivastigmine               | ENZO FDA | 4        | D   | 9      | -0.101    | 0.549           |
| 747 | Bambuterol                 | ENZO FDA | 4        | E   | 9      | -0.062    | 0.339           |
| 748 | Celecoxib                  | ENZO FDA | 4        | F   | 9      | -0.174    | 0.631           |
| 749 | Diclozauril                | ENZO FDA | 4        | G   | 9      | 0.126     | -0.016          |
| 750 | Oxaliplatin                | ENZO FDA | 4        | H   | 9      | -1.156    | 0.23            |
| 751 | Terbinafine                | ENZO FDA | 4        | A   | 10     | -0.037    | 0.087           |
| 752 | Retinoic Acid              | ENZO FDA | 4        | B   | 10     | 0.187     | 0.19            |
| 753 | Delavirdine                | ENZO FDA | 4        | C   | 10     | 0.732     | 0.662           |
| 754 | Rofecoxib                  | ENZO FDA | 4        | D   | 10     | 0.117     | 0.181           |
| 755 | Fentazac                   | ENZO FDA | 4        | E   | 10     | 0.114     | 0.397           |
| 756 | Levetiracetam              | ENZO FDA | 4        | F   | 10     | 0.106     | 0.074           |
| 757 | Didanosine                 | ENZO FDA | 4        | G   | 10     | 0.201     | 0.207           |
| 758 | Anethole, trans-           | ENZO FDA | 4        | H   | 10     | -0.806    | 0.121           |
| 759 | Sodium Phenylbutyrate      | ENZO FDA | 4        | A   | 11     | -0.279    | -0.263          |
| 760 | Troglitazone               | ENZO FDA | 4        | B   | 11     | 0.057     | 0.168           |
| 761 | 10-Hydroxycamptothecin     | ENZO FDA | 4        | C   | 11     | 0.405     | -0.854          |
| 762 | Ergotamine                 | ENZO FDA | 4        | D   | 11     | -0.251    | 1.38            |
| 763 | Mepherytolin               | ENZO FDA | 4        | E   | 11     | 0.112     | 0.264           |
| 764 | Letrozole                  | ENZO FDA | 4        | F   | 11     | 0.687     | 0.169           |
| 765 | Dolasetron                 | ENZO FDA | 4        | G   | 11     | -0.384    | 0.039           |
| 766 | Atazanavir                 | ENZO FDA | 4        | H   | 11     | -1.064    | -0.045          |
| 767 | Mycophenolate mofetil      | ENZO FDA | 5        | A   | 2      | 0.081     | -2.44           |
| 768 | Lofexidine                 | ENZO FDA | 5        | B   | 2      | -0.569    | -0.144          |
| 769 | Rocuronium                 | ENZO FDA | 5        | C   | 2      | 0.044     | -0.44           |
| 770 | Acetylsalicylic Acid       | ENZO FDA | 5        | D   | 2      | -0.951    | -0.126          |
| 771 | Amifostine                 | ENZO FDA | 5        | E   | 2      | -0.237    | 0.356           |
| 772 | Azaperone                  | ENZO FDA | 5        | F   | 2      | -0.866    | 0.278           |
| 773 | Carbadox                   | ENZO FDA | 5        | G   | 2      | -0.896    | 0.458           |
| 774 | Chloroquine                | ENZO FDA | 5        | H   | 2      | -1.052    | -0.864          |
| 775 | Etoricoxib                 | ENZO FDA | 5        | A   | 3      | -1.227    | -0.33           |
| 776 | Meropenem                  | ENZO FDA | 5        | B   | 3      | 0.082     | -0.021          |
| 777 | Ricobendazole              | ENZO FDA | 5        | C   | 3      | -0.599    | 0.13            |
| 778 | Acipimox                   | ENZO FDA | 5        | D   | 3      | 0.018     | 0.013           |
| 779 | DL-Aminoglutethimide       | ENZO FDA | 5        | E   | 3      | 0.074     | 0.963           |
| 780 | Vinblastine                | ENZO FDA | 5        | F   | 3      | 0.335     | 1.171           |
| 781 | Carboplatin                | ENZO FDA | 5        | G   | 3      | -1.138    | 0.984           |
| 782 | Thalidomide                | ENZO FDA | 5        | H   | 3      | -0.733    | -0.946          |
| 783 | Clofarabine                | ENZO FDA | 5        | A   | 4      | 0.607     | -3.344          |
| 784 | Nifekalant                 | ENZO FDA | 5        | B   | 4      | -0.587    | -0.909          |
| 785 | Sulbactam                  | ENZO FDA | 5        | C   | 4      | -0.241    | 0.483           |
| 786 | Acetofenac                 | ENZO FDA | 5        | D   | 4      | 0.608     | 0.156           |
| 787 | 4-Aminosalicylic acid      | ENZO FDA | 5        | E   | 4      | 0.383     | 0.415           |
| 788 | Azithromycin               | ENZO FDA | 5        | F   | 4      | -0.109    | 1.343           |
| 789 | Carbamazepine              | ENZO FDA | 5        | G   | 4      | -0.205    | 0.894           |
| 790 | Ciprofloxacin              | ENZO FDA | 5        | H   | 4      | -0.489    | 0.156           |
| 791 | Cabergoline                | ENZO FDA | 5        | A   | 5      | -0.844    | -0.631          |
| 792 | Octreotide                 | ENZO FDA | 5        | B   | 5      | -0.254    | -0.111          |
| 793 | Thiamphenicol glycinate    | ENZO FDA | 5        | C   | 5      | 1.116     | 0.125           |
| 794 | Acycloguanosine            | ENZO FDA | 5        | D   | 5      | 0.115     | 0.159           |
| 795 | 5-Aminosalicylic acid      | ENZO FDA | 5        | E   | 5      | -0.288    | -0.253          |
| 796 | Aztreonam                  | ENZO FDA | 5        | F   | 5      | 0.175     | 1.287           |
| 797 | Cetoperazone acid          | ENZO FDA | 5        | G   | 5      | 0.216     | 0.315           |
| 798 | Citalopram                 | ENZO FDA | 5        | H   | 5      | -0.347    | -0.144          |
| 799 | Diazep                     | ENZO FDA | 5        | A   | 6      | -0.188    | -1.656          |
| 800 | Oseltamivir                | ENZO FDA | 5        | B   | 6      | 0.394     | -0.485          |
| 801 | Tulobuterol                | ENZO FDA | 5        | C   | 6      | 0.341     | -0.719          |
| 802 | 3'-Azido-3'-deoxythymidine | ENZO FDA | 5        | D   | 6      | -0.056    | -0.431          |
| 803 | Ampicillin                 | ENZO FDA | 5        | E   | 6      | 0.247     | 0.368           |
| 804 | Betamethasone              | ENZO FDA | 5        | F   | 6      | 0.817     | -0.114          |
| 805 | Cefotaxime Acid            | ENZO FDA | 5        | G   | 6      | -0.038    | 0.314           |
| 806 | Clarithromycin             | ENZO FDA | 5        | H   | 6      | -0.547    | 0.737           |
| 807 | Ibandronate                | ENZO FDA | 5        | A   | 7      | -0.855    | -0.385          |
| 808 | Pamidronic acid            | ENZO FDA | 5        | B   | 7      | 0.122     | -0.542          |
| 809 | Vinorelbine                | ENZO FDA | 5        | C   | 7      | 1.184     | -1.434          |
| 810 | Allopurinol                | ENZO FDA | 5        | D   | 7      | 0.361     | 0.003           |
| 811 | Ampiroxcam                 | ENZO FDA | 5        | E   | 7      | -0.311    | 0.229           |

SUPPLEMENTARY DATA

|     | Name                      | Library  | Plate No | Row | Column | ROS score | viability score |
|-----|---------------------------|----------|----------|-----|--------|-----------|-----------------|
| 812 | Bifonazole                | ENZO FDA | 5        | F   | 7      | 0.297     | 1.531           |
| 813 | Ceftazidime               | ENZO FDA | 5        | G   | 7      | -0.26     | -0.249          |
| 814 | Cilmbazole                | ENZO FDA | 5        | H   | 7      | -1.269    | 1.873           |
| 815 | Imipenem                  | ENZO FDA | 5        | A   | 8      | 0.028     | -0.921          |
| 816 | Prämipexole               | ENZO FDA | 5        | B   | 8      | 0.796     | -1.049          |
| 817 | Vindecaine                | ENZO FDA | 5        | C   | 8      | 0.616     | -0.599          |
| 818 | Alendronate               | ENZO FDA | 5        | D   | 8      | 0.414     | -0.306          |
| 819 | Apramycin                 | ENZO FDA | 5        | E   | 8      | 0.427     | 0.513           |
| 820 | Bisacodyl                 | ENZO FDA | 5        | F   | 8      | -0.183    | 0.923           |
| 821 | Chloramphenicol           | ENZO FDA | 5        | G   | 8      | 0.042     | -0.276          |
| 822 | Cilnaifloxacin            | ENZO FDA | 5        | H   | 8      | -1.373    | 2.936           |
| 823 | Lomustine                 | ENZO FDA | 5        | A   | 9      | 0.034     | -0.315          |
| 824 | Triptorelin               | ENZO FDA | 5        | B   | 9      | -0.14     | -0.098          |
| 825 | Salmeterol                | ENZO FDA | 5        | C   | 9      | 0.128     | -0.299          |
| 826 | Altretamine               | ENZO FDA | 5        | D   | 9      | 0.444     | 0.071           |
| 827 | Artemisinin               | ENZO FDA | 5        | E   | 9      | 0.29      | 1.458           |
| 828 | Bromhexine                | ENZO FDA | 5        | F   | 9      | 1.122     | 1.052           |
| 829 | Chlormadinone Acetate     | ENZO FDA | 5        | G   | 9      | 0.129     | 0.481           |
| 830 | Ciomiophane               | ENZO FDA | 5        | H   | 9      | -0.897    | 1.784           |
| 831 | Iloprost                  | ENZO FDA | 5        | A   | 10     | -0.161    | -2.068          |
| 832 | RIFAMYCIN 3V              | ENZO FDA | 5        | B   | 10     | -0.376    | -0.462          |
| 833 | Vincristine               | ENZO FDA | 5        | C   | 10     | 1.038     | -1.843          |
| 834 | Albandazole               | ENZO FDA | 5        | D   | 10     | 1.096     | -1.997          |
| 835 | Atenolol                  | ENZO FDA | 5        | E   | 10     | 0.193     | 0.471           |
| 836 | Busprone                  | ENZO FDA | 5        | F   | 10     | 0.702     | 0.813           |
| 837 | Chlorambucil              | ENZO FDA | 5        | G   | 10     | 0.488     | 0.404           |
| 838 | Clopidol                  | ENZO FDA | 5        | H   | 10     | -0.661    | 1.104           |
| 839 | Lomentzine                | ENZO FDA | 5        | A   | 11     | 0.782     | -0.734          |
| 840 | Risedronic acid           | ENZO FDA | 5        | B   | 11     | -0.307    | -0.202          |
| 841 | Acemetacin                | ENZO FDA | 5        | C   | 11     | 0.485     | -0.077          |
| 842 | Sumatriptan Succinate     | ENZO FDA | 5        | D   | 11     | -0.048    | -0.932          |
| 843 | Atracurium                | ENZO FDA | 5        | E   | 11     | 0.697     | 0.718           |
| 844 | Canrenone                 | ENZO FDA | 5        | F   | 11     | 1.045     | 0.536           |
| 845 | Chlorpheniramine          | ENZO FDA | 5        | G   | 11     | -0.397    | -0.413          |
| 846 | Clopidogrel               | ENZO FDA | 5        | H   | 11     | 0.065     | 1.168           |
| 847 | Clobetasol Propionate     | ENZO FDA | 5        | A   | 2      | -0.443    | 0.268           |
| 848 | Dehydroepandrosterone     | ENZO FDA | 6        | B   | 2      | 0.121     | 0.867           |
| 849 | Doxofylline               | ENZO FDA | 6        | C   | 2      | -0.706    | 1.224           |
| 850 | Eidronate                 | ENZO FDA | 6        | D   | 2      | 0.136     | 1.289           |
| 851 | 5-Fluorouracil            | ENZO FDA | 6        | E   | 2      | -0.356    | 0.21            |
| 852 | Floratuf                  | ENZO FDA | 6        | F   | 2      | 0.221     | 1.504           |
| 853 | Hydrocortisone            | ENZO FDA | 6        | G   | 2      | -0.114    | 0.682           |
| 854 | Lavamisole                | ENZO FDA | 6        | H   | 2      | -1.733    | 0.159           |
| 855 | Cloasantal                | ENZO FDA | 6        | A   | 3      | -0.403    | 0.403           |
| 856 | Desloratadine             | ENZO FDA | 6        | B   | 3      | 0.383     | 0.669           |
| 857 | Doxycycline               | ENZO FDA | 6        | C   | 3      | -0.15     | 0.779           |
| 858 | Etrifinate                | ENZO FDA | 6        | D   | 3      | 0.345     | 1.797           |
| 859 | Flurbiprofen              | ENZO FDA | 6        | E   | 3      | 0.008     | 1.411           |
| 860 | Furosemide                | ENZO FDA | 6        | F   | 3      | 0.314     | 1.539           |
| 861 | Hydrocortisone 21-acetate | ENZO FDA | 6        | G   | 3      | -0.182    | 1.429           |
| 862 | Levonorgestrel            | ENZO FDA | 6        | H   | 3      | -0.482    | 0.845           |
| 863 | Corticosterone            | ENZO FDA | 6        | A   | 4      | 0.14      | -0.468          |
| 864 | Dextromethorphan          | ENZO FDA | 6        | B   | 4      | -0.289    | 0.044           |
| 865 | Enalapril                 | ENZO FDA | 6        | C   | 4      | -0.107    | 0.084           |
| 866 | Trichloromethiazide       | ENZO FDA | 6        | D   | 4      | -0.032    | 0.399           |
| 867 | Fleroxacin                | ENZO FDA | 6        | E   | 4      | 0.402     | 0.782           |
| 868 | Ganciclovir               | ENZO FDA | 6        | F   | 4      | 0.461     | 1.356           |
| 869 | 17-Hydroxyprogesterone    | ENZO FDA | 6        | G   | 4      | 0.789     | 1.188           |
| 870 | Levodopa                  | ENZO FDA | 6        | H   | 4      | -0.73     | 0.143           |
| 871 | Crotamiton                | ENZO FDA | 6        | A   | 5      | -0.617    | -1.048          |
| 872 | Diclofenac                | ENZO FDA | 6        | B   | 5      | 0.153     | -0.153          |
| 873 | Enoxacin                  | ENZO FDA | 6        | C   | 5      | 0.185     | 0.143           |
| 874 | Famciclovir               | ENZO FDA | 6        | D   | 5      | -0.086    | 0.614           |
| 875 | Florfenicol               | ENZO FDA | 6        | E   | 5      | -0.047    | 0.331           |
| 876 | Gatifloxacin              | ENZO FDA | 6        | F   | 5      | -0.373    | 1.2             |
| 877 | Idoxuridine               | ENZO FDA | 6        | G   | 5      | -0.345    | 0.934           |
| 878 | Levofloxacin              | ENZO FDA | 6        | H   | 5      | -0.423    | -0.048          |
| 879 | Cyclophosphamide          | ENZO FDA | 6        | A   | 6      | -0.308    | -1.151          |
| 880 | 2',3'-Dideoxycytidine     | ENZO FDA | 6        | B   | 6      | -0.287    | -0.624          |
| 881 | Enrofloxacin              | ENZO FDA | 6        | C   | 6      | 0.912     | -0.17           |
| 882 | Fenbendazole              | ENZO FDA | 6        | D   | 6      | 1.182     | -0.208          |
| 883 | Floxuridine               | ENZO FDA | 6        | E   | 6      | 0.582     | 0.471           |
| 884 | Gentamycin                | ENZO FDA | 6        | F   | 6      | -0.475    | 1.485           |
| 885 | Ifosfamide                | ENZO FDA | 6        | G   | 6      | 0.264     | 1.365           |
| 886 | Leftunomide               | ENZO FDA | 6        | H   | 6      | -0.72     | 0.708           |
| 887 | Cyproterone Acetate       | ENZO FDA | 6        | A   | 7      | 0.479     | -1.358          |
| 888 | Diethylstilbestrol        | ENZO FDA | 6        | B   | 7      | -0.127    | -0.081          |
| 889 | Ethinisterone             | ENZO FDA | 6        | C   | 7      | -0.431    | -0.021          |
| 890 | Fenbufen                  | ENZO FDA | 6        | D   | 7      | 0.102     | 0.823           |
| 891 | Fluocinolone acetonide    | ENZO FDA | 6        | E   | 7      | 0.587     | 1.162           |
| 892 | Gemfibrozil               | ENZO FDA | 6        | F   | 7      | 0.391     | 0.782           |
| 893 | Imiquimod                 | ENZO FDA | 6        | G   | 7      | -0.547    | 0.038           |
| 894 | Lisinopril                | ENZO FDA | 6        | H   | 7      | -1.121    | 0.256           |
| 895 | Cyclocytidine             | ENZO FDA | 6        | A   | 8      | 0.222     | -2.186          |
| 896 | Diffunisal                | ENZO FDA | 6        | B   | 8      | -2.3      | -1.51           |
| 897 | Esomeprazole              | ENZO FDA | 6        | C   | 8      | 0.606     | -0.453          |
| 898 | Fenoldopam                | ENZO FDA | 6        | D   | 8      | 0.499     | 0.159           |
| 899 | Flubendazole              | ENZO FDA | 6        | E   | 8      | 0.195     | -0.966          |
| 900 | Gliclazide                | ENZO FDA | 6        | F   | 8      | -1.149    | 0.183           |
| 901 | Indapamide                | ENZO FDA | 6        | G   | 8      | -0.851    | -0.09           |
| 902 | Lomefloxacin              | ENZO FDA | 6        | H   | 8      | -1.092    | -0.304          |
| 903 | Cytarabine                | ENZO FDA | 6        | A   | 9      | 0.104     | -3.258          |
| 904 | Disulfiram                | ENZO FDA | 6        | B   | 9      | -0.043    | -1.191          |
| 905 | Estradiol                 | ENZO FDA | 6        | C   | 9      | 0.164     | -0.755          |
| 906 | Fenoprofen                | ENZO FDA | 6        | D   | 9      | 0.788     | -0.275          |
| 907 | Flutamide                 | ENZO FDA | 6        | E   | 9      | -0.288    | -0.01           |
| 908 | Glimepiride               | ENZO FDA | 6        | F   | 9      | 1.117     | 0.263           |



SUPPLEMENTARY DATA

|      | Name                           | Library  | Plate No | Row | Column | ROS score | viability score |
|------|--------------------------------|----------|----------|-----|--------|-----------|-----------------|
| 909  | Itopride                       | ENZO FDA | 6        | G   | 9      | 0.017     | 0.248           |
| 910  | Loratadine                     | ENZO FDA | 6        | H   | 9      | -1.101    | 0.113           |
| 911  | Dacarbazine                    | ENZO FDA | 6        | A   | 10     | -0.468    | -1.843          |
| 912  | Doxazosin                      | ENZO FDA | 6        | B   | 10     | 0.1       | -0.217          |
| 913  | Estrinol                       | ENZO FDA | 6        | C   | 10     | 0.415     | -0.745          |
| 914  | Fenofibrate                    | ENZO FDA | 6        | D   | 10     | -0.271    | 0.758           |
| 915  | Fluconazole                    | ENZO FDA | 6        | E   | 10     | -0.216    | 0.183           |
| 916  | Guafenesin                     | ENZO FDA | 6        | F   | 10     | -0.101    | -0.009          |
| 917  | Itraconazole                   | ENZO FDA | 6        | G   | 10     | 1.363     | -0.91           |
| 918  | Lorglumide                     | ENZO FDA | 6        | H   | 10     | -0.929    | -0.42           |
| 919  | Danazol                        | ENZO FDA | 6        | A   | 11     | 0.162     | -1.865          |
| 920  | Doxifluridine                  | ENZO FDA | 6        | B   | 11     | -0.085    | -2.291          |
| 921  | Estrone                        | ENZO FDA | 6        | C   | 11     | 0.389     | -1.298          |
| 922  | Finasteride                    | ENZO FDA | 6        | D   | 11     | 0.2       | -1.159          |
| 923  | Formestane                     | ENZO FDA | 6        | E   | 11     | 0.786     | -0.693          |
| 924  | Hexestrol                      | ENZO FDA | 6        | F   | 11     | 0.307     | -0.621          |
| 925  | Ketoprofen                     | ENZO FDA | 6        | G   | 11     | 0.272     | -1.08           |
| 926  | Losartan potassium             | ENZO FDA | 6        | H   | 11     | -0.956    | -1.315          |
| 927  | Mebendazole                    | ENZO FDA | 7        | A   | 2      | -0.507    | -1.99           |
| 928  | Minocycline                    | ENZO FDA | 7        | B   | 2      | 0.009     | -0.206          |
| 929  | Norfloxacin                    | ENZO FDA | 7        | C   | 2      | -0.884    | -0.079          |
| 930  | Pantoprazole                   | ENZO FDA | 7        | D   | 2      | -0.435    | 0.99            |
| 931  | Pranoprofen                    | ENZO FDA | 7        | E   | 2      | -0.581    | 0.204           |
| 932  | Quinacrine                     | ENZO FDA | 7        | F   | 2      | -0.748    | -0.025          |
| 933  | Roxatidine acetate             | ENZO FDA | 7        | G   | 2      | -0.533    | 0.617           |
| 934  | Stanozolol                     | ENZO FDA | 7        | H   | 2      | -1.276    | 0.154           |
| 935  | Medroxyprogesterone 17-Acetate | ENZO FDA | 7        | A   | 3      | -0.172    | 1.043           |
| 936  | Mitoxantrone                   | ENZO FDA | 7        | B   | 3      | 0.11      | -2.077          |
| 937  | Nystatin                       | ENZO FDA | 7        | C   | 3      | 0.211     | 0.776           |
| 938  | Paroxetine                     | ENZO FDA | 7        | D   | 3      | 1.361     | 1.046           |
| 939  | Prednisolone                   | ENZO FDA | 7        | E   | 3      | 0.296     | 0.162           |
| 940  | Quinapril                      | ENZO FDA | 7        | F   | 3      | 0.297     | 1               |
| 941  | Roxithromycin                  | ENZO FDA | 7        | G   | 3      | 0.303     | 1.047           |
| 942  | Streptomycin                   | ENZO FDA | 7        | H   | 3      | -1.776    | -0.18           |
| 943  | Mefenamic acid                 | ENZO FDA | 7        | A   | 4      | -0.756    | -1.028          |
| 944  | Taxol                          | ENZO FDA | 7        | B   | 4      | 0.738     | -2.83           |
| 945  | Ofloxacin                      | ENZO FDA | 7        | C   | 4      | 0.106     | 0.549           |
| 946  | Pazufloxacin                   | ENZO FDA | 7        | D   | 4      | 0.368     | 0.42            |
| 947  | Progesterone                   | ENZO FDA | 7        | E   | 4      | -0.354    | -0.026          |
| 948  | Racecadotril                   | ENZO FDA | 7        | F   | 4      | 1.011     | 0.344           |
| 949  | Rufloxacin                     | ENZO FDA | 7        | G   | 4      | -0.052    | 1.106           |
| 950  | Sulfadoxine                    | ENZO FDA | 7        | H   | 4      | -0.341    | 0.411           |
| 951  | Malprialan                     | ENZO FDA | 7        | A   | 5      | -0.518    | -0.374          |
| 952  | Myclobutanil                   | ENZO FDA | 7        | B   | 5      | 0.161     | 0.07            |
| 953  | Oltipraz                       | ENZO FDA | 7        | C   | 5      | 0.009     | 0.483           |
| 954  | Pefloxacin                     | ENZO FDA | 7        | D   | 5      | 0.431     | 0.574           |
| 955  | Procarbazine                   | ENZO FDA | 7        | E   | 5      | 0.518     | -0.04           |
| 956  | Ranolazine                     | ENZO FDA | 7        | F   | 5      | 0.525     | 0.155           |
| 957  | Sarafloxacin                   | ENZO FDA | 7        | G   | 5      | -1.071    | 0.688           |
| 958  | Sulfadiazine                   | ENZO FDA | 7        | H   | 5      | -1.22     | -0.26           |
| 959  | Methyldopa                     | ENZO FDA | 7        | A   | 6      | -0.482    | -0.323          |
| 960  | Nadifloxacin                   | ENZO FDA | 7        | B   | 6      | 0.491     | -0.373          |
| 961  | Omeprazole                     | ENZO FDA | 7        | C   | 6      | -0.096    | 0.814           |
| 962  | Peniclovir                     | ENZO FDA | 7        | D   | 6      | 0.113     | 0.713           |
| 963  | Prothionamide                  | ENZO FDA | 7        | E   | 6      | 0.353     | 0.6             |
| 964  | Ramipril                       | ENZO FDA | 7        | F   | 6      | 0.912     | 0.835           |
| 965  | Scopolamine N-butyl            | ENZO FDA | 7        | G   | 6      | 0.091     | 0.96            |
| 966  | Sulfadimethoxine               | ENZO FDA | 7        | H   | 6      | -0.087    | 0.427           |
| 967  | Methylprednisolone             | ENZO FDA | 7        | A   | 7      | -0.242    | -0.74           |
| 968  | Nabumetone                     | ENZO FDA | 7        | B   | 7      | 0.428     | 0.054           |
| 969  | Oxcarbazepine                  | ENZO FDA | 7        | C   | 7      | 0.199     | 0.786           |
| 970  | Pentoxifylline                 | ENZO FDA | 7        | D   | 7      | 0.165     | 1.163           |
| 971  | Prednisone                     | ENZO FDA | 7        | E   | 7      | 0.177     | 0.517           |
| 972  | Rebamipide                     | ENZO FDA | 7        | F   | 7      | -0.108    | 0.951           |
| 973  | Scopolamine                    | ENZO FDA | 7        | G   | 7      | 0.034     | 0.984           |
| 974  | Sulfasalazine                  | ENZO FDA | 7        | H   | 7      | -0.861    | -0.103          |
| 975  | Metoprolol                     | ENZO FDA | 7        | A   | 8      | -0.749    | -0.577          |
| 976  | Naphazoline                    | ENZO FDA | 7        | B   | 8      | 0.764     | -0.508          |
| 977  | Oxiconazole                    | ENZO FDA | 7        | C   | 8      | -0.967    | 0.408           |
| 978  | Penicillin V                   | ENZO FDA | 7        | D   | 8      | 0.189     | 1.226           |
| 979  | Pregnenolone                   | ENZO FDA | 7        | E   | 8      | -0.467    | 0.695           |
| 980  | Ribavirin                      | ENZO FDA | 7        | F   | 8      | 0.426     | -0.04           |
| 981  | Secnidazole                    | ENZO FDA | 7        | G   | 8      | -0.784    | 0.289           |
| 982  | Tamsulosin                     | ENZO FDA | 7        | H   | 8      | -1.655    | -0.836          |
| 983  | Methimazole                    | ENZO FDA | 7        | A   | 9      | -0.921    | -0.35           |
| 984  | Nefazodone                     | ENZO FDA | 7        | B   | 9      | -0.027    | -0.92           |
| 985  | Oxacillin                      | ENZO FDA | 7        | C   | 9      | 0.26      | 0.463           |
| 986  | Phenylbutazone                 | ENZO FDA | 7        | D   | 9      | 0.523     | 0.289           |
| 987  | Primaquine                     | ENZO FDA | 7        | E   | 9      | -0.493    | 0.898           |
| 988  | Neftinavir mesylate            | ENZO FDA | 7        | F   | 9      | -0.067    | 1.17            |
| 989  | Sibutramine                    | ENZO FDA | 7        | G   | 9      | -0.074    | 0.685           |
| 990  | Telmisartan                    | ENZO FDA | 7        | H   | 9      | -1.376    | 1.209           |
| 991  | Metronidazole                  | ENZO FDA | 7        | A   | 10     | 0.38      | -1.804          |
| 992  | Niflumic acid                  | ENZO FDA | 7        | B   | 10     | -0.549    | -1.356          |
| 993  | Oxifenizone                    | ENZO FDA | 7        | C   | 10     | 1.007     | 0.01            |
| 994  | Piperacillin                   | ENZO FDA | 7        | D   | 10     | 0.233     | 0.164           |
| 995  | Praziquantel                   | ENZO FDA | 7        | E   | 10     | -0.594    | 1.809           |
| 996  | Rimantadine                    | ENZO FDA | 7        | F   | 10     | 0.507     | 0.363           |
| 997  | Sparfloxacin                   | ENZO FDA | 7        | G   | 10     | -0.133    | 0.632           |
| 998  | Tenoxicam                      | ENZO FDA | 7        | H   | 10     | -0.486    | -0.767          |
| 999  | Miconazole                     | ENZO FDA | 7        | A   | 11     | -1.078    | -2.233          |
| 1000 | Norethindrone                  | ENZO FDA | 7        | B   | 11     | -0.208    | -2.12           |
| 1001 | Oxibendazole                   | ENZO FDA | 7        | C   | 11     | 0.573     | -2.688          |
| 1002 | Pravastatin Lactone            | ENZO FDA | 7        | D   | 11     | 1.351     | -2.347          |
| 1003 | Pyrantel Pamoate               | ENZO FDA | 7        | E   | 11     | 0.28      | -0.11           |
| 1004 | Propranolol                    | ENZO FDA | 7        | F   | 11     | 0.387     | -1.123          |
| 1005 | Spironolactone                 | ENZO FDA | 7        | G   | 11     | -0.177    | -0.683          |

SUPPLEMENTARY DATA

|      | Name                           | Library   | Plate No | Row | Column | ROS score | viability score |
|------|--------------------------------|-----------|----------|-----|--------|-----------|-----------------|
| 1006 | Terazosin                      | ENZO FDA  | 7        | H   | 11     | -0.035    | -1.439          |
| 1007 | Tetracycline                   | ENZO FDA  | 8        | A   | 2      | -1.27     | -0.607          |
| 1008 | Tofenamide acid                | ENZO FDA  | 8        | B   | 2      | -0.045    | -0.476          |
| 1009 | Venlafaxine                    | ENZO FDA  | 8        | C   | 2      | -0.216    | -0.511          |
| 1010 | Harmina                        | ENZO FDA  | 8        | D   | 2      | 0.111     | -0.327          |
| 1011 | Thioridazine                   | ENZO FDA  | 8        | E   | 2      | 0.046     | -0.341          |
| 1012 | Zaprinast                      | ENZO FDA  | 8        | F   | 2      | -0.123    | -0.035          |
| 1013 | Megestrol Acetate              | ENZO FDA  | 8        | G   | 2      | -0.424    | 0.429           |
| 1014 | Methsargide                    | ENZO FDA  | 8        | H   | 2      | -1.106    | 0.147           |
| 1015 | Tenatoprazole                  | ENZO FDA  | 8        | A   | 3      | -0.405    | -0.318          |
| 1016 | Tolmetin                       | ENZO FDA  | 8        | B   | 3      | -0.17     | -0.114          |
| 1017 | Vidarabine                     | ENZO FDA  | 8        | C   | 3      | 0.528     | -0.39           |
| 1018 | Cinanserlin                    | ENZO FDA  | 8        | D   | 3      | 0.718     | -0.182          |
| 1019 | Clofamide                      | ENZO FDA  | 8        | E   | 3      | 0.527     | 0.34            |
| 1020 | Zandaverine                    | ENZO FDA  | 8        | F   | 3      | 0.505     | 0.072           |
| 1021 | Melengestrol Acetate           | ENZO FDA  | 8        | G   | 3      | -0.188    | 0.787           |
| 1022 | Esmolol                        | ENZO FDA  | 8        | H   | 3      | -1.439    | 0.473           |
| 1023 | Temozolomide                   | ENZO FDA  | 8        | A   | 4      | -1.027    | -1.025          |
| 1024 | Toltrazuril                    | ENZO FDA  | 8        | B   | 4      | 0.858     | -0.223          |
| 1025 | Iproniazid                     | ENZO FDA  | 8        | C   | 4      | 0.098     | -0.374          |
| 1026 | Dibenzepine                    | ENZO FDA  | 8        | D   | 4      | -0.18     | -0.127          |
| 1027 | Etazolate                      | ENZO FDA  | 8        | E   | 4      | 0.81      | 0.124           |
| 1028 | Alprostadil                    | ENZO FDA  | 8        | F   | 4      | -0.007    | -0.116          |
| 1029 | Tamoxifen                      | ENZO FDA  | 8        | G   | 4      | -0.419    | 2.535           |
| 1030 | Pantothenic acid               | ENZO FDA  | 8        | H   | 4      | -0.974    | 0.451           |
| 1031 | Tibolone                       | ENZO FDA  | 8        | A   | 5      | -0.717    | 0.187           |
| 1032 | Tramadol                       | ENZO FDA  | 8        | B   | 5      | -0.383    | 0.256           |
| 1033 | Benzamil                       | ENZO FDA  | 8        | C   | 5      | 0.816     | 0.17            |
| 1034 | Dihydroergocristine            | ENZO FDA  | 8        | D   | 5      | 0.751     | -0.07           |
| 1035 | Isobutylmethylxanthine         | ENZO FDA  | 8        | E   | 5      | 0.304     | 0.305           |
| 1036 | Misoprostol                    | ENZO FDA  | 8        | F   | 5      | 0.515     | 0.899           |
| 1037 | Amprenavir                     | ENZO FDA  | 8        | G   | 5      | -0.817    | 0.864           |
| 1038 | Phloridzin                     | ENZO FDA  | 8        | H   | 5      | -1.33     | 0.6             |
| 1039 | Ticozanole                     | ENZO FDA  | 8        | A   | 6      | -1.062    | -0.287          |
| 1040 | Triamcinolone                  | ENZO FDA  | 8        | B   | 6      | 0.193     | -0.36           |
| 1041 | Bupivacaine                    | ENZO FDA  | 8        | C   | 6      | 0.473     | -0.549          |
| 1042 | Fluperlapine                   | ENZO FDA  | 8        | D   | 6      | -0.009    | 0.335           |
| 1043 | Irsogladine                    | ENZO FDA  | 8        | E   | 6      | 0.187     | 0.338           |
| 1044 | Argatroban                     | ENZO FDA  | 8        | F   | 6      | -0.054    | 0.473           |
| 1045 | Apreritant                     | ENZO FDA  | 8        | G   | 6      | -0.014    | 0.364           |
| 1046 | Phenylpropanolamine            | ENZO FDA  | 8        | H   | 6      | -1.01     | 0.458           |
| 1047 | Tinidazole                     | ENZO FDA  | 8        | A   | 7      | -0.382    | -0.84           |
| 1048 | Trimethoprim                   | ENZO FDA  | 8        | B   | 7      | 0.752     | -0.412          |
| 1049 | Astemizole                     | ENZO FDA  | 8        | C   | 7      | 2.387     | -5.779          |
| 1050 | Fluoxetine                     | ENZO FDA  | 8        | D   | 7      | 0.892     | -0.267          |
| 1051 | Mirinone                       | ENZO FDA  | 8        | E   | 7      | -0.177    | -0.407          |
| 1052 | Cilastatin                     | ENZO FDA  | 8        | F   | 7      | 0.571     | 0.071           |
| 1053 | Boeentan                       | ENZO FDA  | 8        | G   | 7      | -0.038    | 0.572           |
| 1054 | Succinylcholine                | ENZO FDA  | 8        | H   | 7      | -0.343    | 0.559           |
| 1055 | Tobramycin (free base)         | ENZO FDA  | 8        | A   | 8      | -1.031    | -1.056          |
| 1056 | Tropisetron                    | ENZO FDA  | 8        | B   | 8      | 0.291     | -0.925          |
| 1057 | Ketotifen                      | ENZO FDA  | 8        | C   | 8      | 0.067     | -0.829          |
| 1058 | Ondansetron                    | ENZO FDA  | 8        | D   | 8      | 0.44      | -0.552          |
| 1059 | Rollipram                      | ENZO FDA  | 8        | E   | 8      | 1.025     | -0.267          |
| 1060 | Artesunate                     | ENZO FDA  | 8        | F   | 8      | 0.697     | -0.95           |
| 1061 | Efavirenz                      | ENZO FDA  | 8        | G   | 8      | 0.174     | -0.027          |
| 1062 | Trifluoperidol                 | ENZO FDA  | 8        | H   | 8      | -0.81     | 0.04            |
| 1063 | Tosufloxacin                   | ENZO FDA  | 8        | A   | 9      | -0.326    | -1.347          |
| 1064 | Tyloin                         | ENZO FDA  | 8        | B   | 9      | -0.008    | -0.257          |
| 1065 | Levocabastine                  | ENZO FDA  | 8        | C   | 9      | 0.192     | -0.422          |
| 1066 | Katanearin                     | ENZO FDA  | 8        | D   | 9      | 0.577     | 1.001           |
| 1067 | Siguazodan                     | ENZO FDA  | 8        | E   | 9      | 0.692     | 0.629           |
| 1068 | Picotamide                     | ENZO FDA  | 8        | F   | 9      | 0.005     | 1.1             |
| 1069 | Taurocholic acid               | ENZO FDA  | 8        | G   | 9      | 0.361     | 1.054           |
| 1070 | L-thyroxine                    | ENZO FDA  | 8        | H   | 9      | -1.068    | 0.621           |
| 1071 | Yopotecan                      | ENZO FDA  | 8        | A   | 10     | -0.484    | -0.943          |
| 1072 | Valaciclovir                   | ENZO FDA  | 8        | B   | 10     | -0.551    | -0.319          |
| 1073 | Naloxone                       | ENZO FDA  | 8        | C   | 10     | 0.592     | -0.619          |
| 1074 | Tiotropium Bromide             | ENZO FDA  | 8        | D   | 10     | 0.898     | -0.161          |
| 1075 | Trequinain HCl                 | ENZO FDA  | 8        | E   | 10     | -0.648    | 0.827           |
| 1076 | Conduritol B epoxide           | ENZO FDA  | 8        | F   | 10     | -0.275    | 1.285           |
| 1077 | Miglustat                      | ENZO FDA  | 8        | G   | 10     | -0.314    | 0.541           |
| 1078 | Cyproheptadine                 | ENZO FDA  | 8        | H   | 10     | -1.046    | -0.357          |
| 1079 | Toramifene                     | ENZO FDA  | 8        | A   | 11     | -0.521    | 3.498           |
| 1080 | Vecuronium                     | ENZO FDA  | 8        | B   | 11     | 1.074     | -0.424          |
| 1081 | Naloxonazine                   | ENZO FDA  | 8        | C   | 11     | 0.582     | -0.737          |
| 1082 | Mesoridazine                   | ENZO FDA  | 8        | D   | 11     | -0.191    | -0.213          |
| 1083 | Vinpocetine                    | ENZO FDA  | 8        | E   | 11     | -0.058    | 0.652           |
| 1084 | Mifepristone                   | ENZO FDA  | 8        | F   | 11     | 0.22      | 0.803           |
| 1085 | Fulvestrant                    | ENZO FDA  | 8        | G   | 11     | -1.037    | 1.18            |
| 1086 | Benzylamine                    | ENZO FDA  | 8        | H   | 11     | -1.968    | 0.4             |
| 1087 | Azaguanine-8                   | Prestwick | 1        | A   | 2      | 1.487     | 0.486           |
| 1088 | Mefloquine                     | Prestwick | 1        | B   | 2      | 0.017     | 2.147           |
| 1089 | Sulfaphenazole                 | Prestwick | 1        | C   | 2      | 0.407     | 1.893           |
| 1090 | Chloramphenicol                | Prestwick | 1        | D   | 2      | 0.295     | -0.091          |
| 1091 | Procaine hydrochloride         | Prestwick | 1        | E   | 2      | 0.362     | 0.762           |
| 1092 | Trichlorfon                    | Prestwick | 1        | F   | 2      | -0.624    | 1.2             |
| 1093 | Morantel tartrate              | Prestwick | 1        | G   | 2      | -1.43     | 0.911           |
| 1094 | Todralazine hydrochloride      | Prestwick | 1        | H   | 2      | -1.412    | 1.339           |
| 1095 | Allantoin                      | Prestwick | 1        | A   | 3      | -2.536    | 0.295           |
| 1096 | Benzonate                      | Prestwick | 1        | B   | 3      | -1.006    | 0.899           |
| 1097 | Panthenol (D)                  | Prestwick | 1        | C   | 3      | 2.328     | 1.079           |
| 1098 | Epirizole                      | Prestwick | 1        | D   | 3      | -0.944    | 0.711           |
| 1099 | Moxlayfite hydrochloride       | Prestwick | 1        | E   | 3      | 0.985     | 1.099           |
| 1100 | Carbamazepine                  | Prestwick | 1        | F   | 3      | -0.055    | 1.119           |
| 1101 | Homatropine hydrobromide (R,S) | Prestwick | 1        | G   | 3      | 0.465     | 1.827           |
| 1102 | Imipramine hydrochloride       | Prestwick | 1        | H   | 3      | -0.778    | 0.826           |
| 1103 | Acetazolamide                  | Prestwick | 1        | A   | 4      | 0.337     | 0.275           |
| 1104 | Hydroflumethazide              | Prestwick | 1        | B   | 4      | 1.629     | 0.991           |

SUPPLEMENTARY DATA

|      | Name                                       | Library   | Plate No | Row | Column | ROS score | viability score |
|------|--------------------------------------------|-----------|----------|-----|--------|-----------|-----------------|
| 1105 | Sulfadiazine                               | Prestwick | 1        | C   | 4      | 0.344     | 0.133           |
| 1106 | Diprophylline                              | Prestwick | 1        | D   | 4      | 0.754     | 0.385           |
| 1107 | Betazole hydrochloride                     | Prestwick | 1        | E   | 4      | -0.134    | 0.161           |
| 1108 | Triflupromazine hydrochloride              | Prestwick | 1        | F   | 4      | 0.796     | 0.752           |
| 1109 | Nifedipine                                 | Prestwick | 1        | G   | 4      | -1.119    | 0.588           |
| 1110 | Sulindac                                   | Prestwick | 1        | H   | 4      | -0.302    | 0.113           |
| 1111 | Metformin hydrochloride                    | Prestwick | 1        | A   | 5      | -0.404    | -0.423          |
| 1112 | Sulfacetamide sodic hydrate                | Prestwick | 1        | B   | 5      | -0.799    | 1.375           |
| 1113 | Norethynodrel                              | Prestwick | 1        | C   | 5      | 0.988     | 0.803           |
| 1114 | Triamterene                                | Prestwick | 1        | D   | 5      | 0.403     | 0.468           |
| 1115 | Isoxicam                                   | Prestwick | 1        | E   | 5      | 0.7       | -0.173          |
| 1116 | Meferamic acid                             | Prestwick | 1        | F   | 5      | 0.658     | 0.601           |
| 1117 | Chlorpromazine hydrochloride               | Prestwick | 1        | G   | 5      | -0.605    | -0.046          |
| 1118 | Amiltrypiline hydrochloride                | Prestwick | 1        | H   | 5      | -1.312    | -0.29           |
| 1119 | Atracurium besylate                        | Prestwick | 1        | A   | 6      | -2.012    | 0.435           |
| 1120 | Heptaminol hydrochloride                   | Prestwick | 1        | B   | 6      | -0.059    | 1.238           |
| 1121 | Thiamphenicol                              | Prestwick | 1        | C   | 6      | 0.786     | -0.081          |
| 1122 | Dapsone                                    | Prestwick | 1        | D   | 6      | 0.254     | 0.264           |
| 1123 | Naproxen                                   | Prestwick | 1        | E   | 6      | -0.127    | -0.206          |
| 1124 | Acetohexamide                              | Prestwick | 1        | F   | 6      | ????      | 0.205           |
| 1125 | Diphenhydramine hydrochloride              | Prestwick | 1        | G   | 6      | 0.28      | -0.141          |
| 1126 | Adiphenine hydrochloride                   | Prestwick | 1        | H   | 6      | -1.317    | -1.114          |
| 1127 | Isoflupredone acetate                      | Prestwick | 1        | A   | 7      | 0.75      | -0.641          |
| 1128 | Sulfathiazole                              | Prestwick | 1        | B   | 7      | 0.257     | -0.141          |
| 1129 | Cimetidine                                 | Prestwick | 1        | C   | 7      | -0.235    | 0.302           |
| 1130 | Troleandomycin                             | Prestwick | 1        | D   | 7      | -0.153    | 0.439           |
| 1131 | Naphazoline hydrochloride                  | Prestwick | 1        | E   | 7      | 1.589     | -0.171          |
| 1132 | Sulpiride                                  | Prestwick | 1        | F   | 7      | 0.144     | 0.442           |
| 1133 | Minaprine dlhydrochloride                  | Prestwick | 1        | G   | 7      | 0.222     | -0.688          |
| 1134 | Dibucaine                                  | Prestwick | 1        | H   | 7      | -0.338    | -0.96           |
| 1135 | Amiloride hydrochloride dihydrate          | Prestwick | 1        | A   | 8      | -0.557    | -0.619          |
| 1136 | Levodopa                                   | Prestwick | 1        | B   | 8      | 0.548     | -0.49           |
| 1137 | Doxyamine succinate                        | Prestwick | 1        | C   | 8      | 0.185     | -0.554          |
| 1138 | Pyrimethamine                              | Prestwick | 1        | D   | 8      | -0.524    | -0.395          |
| 1139 | Ticlopidine hydrochloride                  | Prestwick | 1        | E   | 8      | -0.585    | 0.63            |
| 1140 | Banoxinate hydrochloride                   | Prestwick | 1        | F   | 8      | -0.956    | -0.538          |
| 1141 | Miconazole                                 | Prestwick | 1        | G   | 8      | -0.619    | -0.111          |
| 1142 | Prednisone                                 | Prestwick | 1        | H   | 8      | -0.353    | -0.696          |
| 1143 | Amprolium hydrochloride                    | Prestwick | 1        | A   | 9      | -1.763    | -1.299          |
| 1144 | Iloxuridine                                | Prestwick | 1        | B   | 9      | 0.904     | -0.526          |
| 1145 | Ethambutol dihydrochloride                 | Prestwick | 1        | C   | 9      | 0.419     | 0.291           |
| 1146 | Hexamethonium dibromide dihydrate          | Prestwick | 1        | D   | 9      | 0.467     | 0.03            |
| 1147 | Dicyclimone hydrochloride                  | Prestwick | 1        | E   | 9      | 0.531     | 0.388           |
| 1148 | Oxethazaline                               | Prestwick | 1        | F   | 9      | -0.506    | 0.109           |
| 1149 | Isoxsuprine hydrochloride                  | Prestwick | 1        | G   | 9      | 0.778     | 0.014           |
| 1150 | Thloridazine hydrochloride                 | Prestwick | 1        | H   | 9      | -2.639    | -0.312          |
| 1151 | Hydrochlorothiazide                        | Prestwick | 1        | A   | 10     | -1.481    | -1.103          |
| 1152 | Captopril                                  | Prestwick | 1        | B   | 10     | -1.402    | -0.369          |
| 1153 | Antipyrine                                 | Prestwick | 1        | C   | 10     | -0.319    | -0.309          |
| 1154 | Diffunisal                                 | Prestwick | 1        | D   | 10     | 0.129     | -0.092          |
| 1155 | Amyleine hydrochloride                     | Prestwick | 1        | E   | 10     | 0.183     | -0.198          |
| 1156 | Pheniramine maleate                        | Prestwick | 1        | F   | 10     | 0.586     | -0.72           |
| 1157 | Acetabutoil hydrochloride                  | Prestwick | 1        | G   | 10     | 1.24      | -0.472          |
| 1158 | Diphenamyl methylsulfate                   | Prestwick | 1        | H   | 10     | -1.742    | -0.795          |
| 1159 | Sulfaguanidine                             | Prestwick | 1        | A   | 11     | -0.397    | -1.869          |
| 1160 | Minoxidil                                  | Prestwick | 1        | B   | 11     | -1.305    | -1.741          |
| 1161 | Antipyrine, 4-hydroxy                      | Prestwick | 1        | C   | 11     | 0.614     | -0.981          |
| 1162 | Niclosamide                                | Prestwick | 1        | D   | 11     | 2.099     | -5.55           |
| 1163 | Lidocaine hydrochloride                    | Prestwick | 1        | E   | 11     | -0.432    | -0.667          |
| 1164 | Tolazoline hydrochloride                   | Prestwick | 1        | F   | 11     | -0.71     | -0.773          |
| 1165 | Tolnattate                                 | Prestwick | 1        | G   | 11     | -0.454    | -0.296          |
| 1166 | Trimethobenzamide hydrochloride            | Prestwick | 1        | H   | 11     | -0.46     | -0.821          |
| 1167 | Metronidazole                              | Prestwick | 2        | A   | 2      | -0.801    | 0.293           |
| 1168 | Khellin                                    | Prestwick | 2        | B   | 2      | 0.01      | 0.861           |
| 1169 | R(-)-Apomorphine hydrochloride hemihydrate | Prestwick | 2        | C   | 2      | -0.194    | 0.515           |
| 1170 | Naloxone hydrochloride                     | Prestwick | 2        | D   | 2      | -1.327    | 0.445           |
| 1171 | Bromocryptine mesylate                     | Prestwick | 2        | E   | 2      | 1.044     | 0.754           |
| 1172 | Glipizide                                  | Prestwick | 2        | F   | 2      | -0.79     | 0.554           |
| 1173 | Verapamil hydrochloride                    | Prestwick | 2        | G   | 2      | 0.01      | 0.446           |
| 1174 | Erythromycin                               | Prestwick | 2        | H   | 2      | -1.6      | 0.582           |
| 1175 | Fulvestrant                                | Prestwick | 2        | A   | 3      | 0.154     | 0.752           |
| 1176 | Zimeldine dihydrochloride monohydrate      | Prestwick | 2        | B   | 3      | 0.193     | 0.86            |
| 1177 | Amoxapine                                  | Prestwick | 2        | C   | 3      | 0.745     | 0.371           |
| 1178 | Metolazone                                 | Prestwick | 2        | D   | 3      | 0.778     | 0.786           |
| 1179 | Amispramone hydrochloride                  | Prestwick | 2        | E   | 3      | -0.776    | 0.63            |
| 1180 | Loxapine succinate                         | Prestwick | 2        | F   | 3      | 0.12      | 0.535           |
| 1181 | Dipyridamole                               | Prestwick | 2        | G   | 3      | 0.078     | 0.376           |
| 1182 | Chloroxine                                 | Prestwick | 2        | H   | 3      | -1.775    | -0.805          |
| 1183 | Edrophonium chloride                       | Prestwick | 2        | A   | 4      | -0.403    | 0.486           |
| 1184 | Azacyclonol                                | Prestwick | 2        | B   | 4      | 0.55      | 0.16            |
| 1185 | Cyproheptadine hydrochloride               | Prestwick | 2        | C   | 4      | 0.813     | 0.051           |
| 1186 | Ciprofloxacin hydrochloride                | Prestwick | 2        | D   | 4      | -0.139    | 0.137           |
| 1187 | Dehydrocholic acid                         | Prestwick | 2        | E   | 4      | -0.156    | 1.881           |
| 1188 | Hydroxyzine dihydrochloride                | Prestwick | 2        | F   | 4      | -0.245    | 0.729           |
| 1189 | Chlorhexidine                              | Prestwick | 2        | G   | 4      | 1.567     | -3.368          |
| 1190 | Didanosine                                 | Prestwick | 2        | H   | 4      | -1.387    | 0.535           |
| 1191 | Moroxidine hydrochloride                   | Prestwick | 2        | A   | 5      | -0.13     | -0.28           |
| 1192 | Azathioprine                               | Prestwick | 2        | B   | 5      | 0.537     | 0.436           |
| 1193 | Famotidine                                 | Prestwick | 2        | C   | 5      | -0.587    | -0.085          |
| 1194 | Ampicillin trihydrate                      | Prestwick | 2        | D   | 5      | 1.003     | 0.542           |
| 1195 | Tioconazole                                | Prestwick | 2        | E   | 5      | 0.261     | 0.724           |
| 1196 | Diltiazem hydrochloride                    | Prestwick | 2        | F   | 5      | 1.21      | 0.457           |
| 1197 | Loperamide hydrochloride                   | Prestwick | 2        | G   | 5      | 1.057     | 0.391           |
| 1198 | Josamycin                                  | Prestwick | 2        | H   | 5      | -0.768    | -0.847          |
| 1199 | Baclofen (R,S)                             | Prestwick | 2        | A   | 6      | -0.961    | -0.858          |
| 1200 | Lynestrenol                                | Prestwick | 2        | B   | 6      | 0.399     | -0.298          |
| 1201 | Diazol                                     | Prestwick | 2        | C   | 6      | 0.961     | -0.442          |
| 1202 | Haloperidol                                | Prestwick | 2        | D   | 6      | 0.353     | -0.032          |
| 1203 | Perphenazine                               | Prestwick | 2        | E   | 6      | 0.953     | 0.482           |
| 1204 | Methotrexate                               | Prestwick | 2        | F   | 6      | 1.136     | -0.308          |
| 1205 | Chlortetracycline hydrochloride            | Prestwick | 2        | G   | 6      | -0.065    | 0.505           |
| 1206 | Paclitaxel                                 | Prestwick | 2        | H   | 6      | -0.7      | -2.093          |
| 1207 | Acyclovir                                  | Prestwick | 2        | A   | 7      | -1.906    | -0.045          |
| 1208 | Guanabenz acetate                          | Prestwick | 2        | B   | 7      | -0.426    | -0.491          |
| 1209 | Nicorandil                                 | Prestwick | 2        | C   | 7      | 0.463     | -1.045          |



SUPPLEMENTARY DATA

|      | Name                                      | Library   | Plate No | Row | Column | ROS score | viability score |
|------|-------------------------------------------|-----------|----------|-----|--------|-----------|-----------------|
| 1210 | Naltrexone hydrochloride dihydrate        | PreStwick | 2        | D   | 7      | 0.654     | 0.654           |
| 1211 | Mefloquine hydrochloride                  | PreStwick | 2        | E   | 7      | -2.289    | -0.043          |
| 1212 | Azamirole                                 | PreStwick | 2        | F   | 7      | -2.389    | -4.7            |
| 1213 | Ramoxifen citrate                         | PreStwick | 2        | G   | 7      | -2.208    | 2.716           |
| 1214 | Ivermectin                                | PreStwick | 2        | H   | 7      | -2.892    | 0.205           |
| 1215 | Diazoxide                                 | PreStwick | 2        | A   | 8      | -0.92     | -0.853          |
| 1216 | Disulfiram                                | PreStwick | 2        | B   | 8      | -2.383    | -1.245          |
| 1217 | Pioglitazone                              | PreStwick | 2        | C   | 8      | 0.624     | -0.357          |
| 1218 | Chlorpheniramine maleate                  | PreStwick | 2        | D   | 8      | 0.792     | -0.643          |
| 1219 | Isoconazole                               | PreStwick | 2        | E   | 8      | 0.418     | 0.054           |
| 1220 | Clindamycin hydrochloride                 | PreStwick | 2        | F   | 8      | 1.171     | -0.983          |
| 1221 | Nitroglycerin                             | PreStwick | 2        | G   | 8      | 0.303     | -0.888          |
| 1222 | Salfamine triethiodide                    | PreStwick | 2        | H   | 8      | -2.845    | 0.207           |
| 1223 | Amilorone                                 | PreStwick | 2        | A   | 9      | -0.89     | -0.195          |
| 1224 | Acetylsalicylic acid                      | PreStwick | 2        | B   | 9      | -2.413    | -0.127          |
| 1225 | Norfenefrine maleate                      | PreStwick | 2        | C   | 9      | 0.878     | 0.288           |
| 1226 | Nalbuphine hydrochloride                  | PreStwick | 2        | D   | 9      | 0.42      | 0.283           |
| 1227 | Spirolactone                              | PreStwick | 2        | E   | 9      | -0.051    | 0.255           |
| 1228 | Terfenadine                               | PreStwick | 2        | F   | 9      | 0.224     | -0.29           |
| 1229 | Canrenolic acid potassium salt            | PreStwick | 2        | G   | 9      | -2.048    | 0.375           |
| 1230 | Neomycin sulfate                          | PreStwick | 2        | H   | 9      | -2.672    | 1.151           |
| 1231 | Equisilfen                                | PreStwick | 2        | A   | 10     | -2.958    | -0.4            |
| 1232 | Mianserin hydrochloride                   | PreStwick | 2        | B   | 10     | -0.06     | 0.044           |
| 1233 | Diclofenac maleate                        | PreStwick | 2        | C   | 10     | 0.244     | -0.367          |
| 1234 | Pilocarpine monohydrate                   | PreStwick | 2        | D   | 10     | 0.308     | -1.114          |
| 1235 | Pirenzepine dihydrochloride               | PreStwick | 2        | E   | 10     | 0.159     | -1.149          |
| 1236 | Cefotaxime sodium salt                    | PreStwick | 2        | F   | 10     | -2.033    | -0.227          |
| 1237 | Thiopropazine dimethylate                 | PreStwick | 2        | G   | 10     | -1.177    | 0.228           |
| 1238 | Dihydrostreptomycin sulfate               | PreStwick | 2        | H   | 10     | -1.333    | -0.094          |
| 1239 | Pindolol                                  | PreStwick | 2        | A   | 11     | -0.399    | -0.504          |
| 1240 | Nocodazole                                | PreStwick | 2        | B   | 11     | -0.13     | -1.819          |
| 1241 | Oxandrolone                               | PreStwick | 2        | C   | 11     | 0.266     | -0.021          |
| 1242 | Triamcinolone                             | PreStwick | 2        | D   | 11     | 1.049     | -0.111          |
| 1243 | Dexamethasone acetate                     | PreStwick | 2        | E   | 11     | 0.564     | 0.719           |
| 1244 | Tetracycline hydrochloride                | PreStwick | 2        | F   | 11     | -2.141    | 0.362           |
| 1245 | Dihydroergotamine tartrate                | PreStwick | 2        | G   | 11     | -2.919    | 1.281           |
| 1246 | Gentamicin sulfate                        | PreStwick | 2        | H   | 11     | -1.387    | 0.316           |
| 1247 | Isoniazid                                 | PreStwick | 2        | A   | 12     | -1.852    | -0.233          |
| 1248 | Tranexamic acid                           | PreStwick | 3        | B   | 2      | -0.664    | 0.622           |
| 1249 | Amipyron                                  | PreStwick | 3        | C   | 2      | -0.03     | 0.188           |
| 1250 | Mildronine hydrochloride                  | PreStwick | 3        | D   | 2      | 0.914     | 0.475           |
| 1251 | Ranitidine hydrochloride                  | PreStwick | 3        | E   | 2      | 0.35      | 0.434           |
| 1252 | Piroxicam                                 | PreStwick | 3        | F   | 2      | 1.196     | 0.144           |
| 1253 | Norfloxacin                               | PreStwick | 3        | G   | 2      | -0.344    | 0.392           |
| 1254 | Etidolac                                  | PreStwick | 3        | H   | 2      | -0.878    | 0.307           |
| 1255 | Pantylentetrazole                         | PreStwick | 3        | A   | 3      | -0.516    | 0.678           |
| 1256 | Etofylline                                | PreStwick | 3        | B   | 3      | -0.21     | 1.092           |
| 1257 | Levamisole hydrochloride                  | PreStwick | 3        | C   | 3      | 0.348     | -0.008          |
| 1258 | Thalidomide                               | PreStwick | 3        | D   | 3      | -0.575    | -0.217          |
| 1259 | Tratrol, 3,3',5-triiodothyroacetic acid   | PreStwick | 3        | E   | 3      | 0.341     | 0.787           |
| 1260 | Pyranol tartrate                          | PreStwick | 3        | F   | 3      | 0.729     | 0.513           |
| 1261 | Antimycin A                               | PreStwick | 3        | G   | 3      | 1.784     | -5.059          |
| 1262 | Scopolamin-N-oxide hydrobromide           | PreStwick | 3        | H   | 3      | -0.708    | 0.021           |
| 1263 | Chloroxazone                              | PreStwick | 3        | A   | 4      | -0.752    | 0.489           |
| 1264 | Tranlycypromine hydrochloride             | PreStwick | 3        | B   | 4      | -0.451    | 0.197           |
| 1265 | Pargyline hydrochloride                   | PreStwick | 3        | C   | 4      | 0.529     | 0.366           |
| 1266 | Oxolinic acid                             | PreStwick | 3        | D   | 4      | 0.251     | -0.662          |
| 1267 | Flufenamic acid                           | PreStwick | 3        | E   | 4      | 0.517     | 0.187           |
| 1268 | Fenepiride hydrochloride                  | PreStwick | 3        | F   | 4      | 0.376     | 0.127           |
| 1269 | Xylometazoline hydrochloride              | PreStwick | 3        | G   | 4      | 0.622     | 0.08            |
| 1270 | Hyoscynamine (L)                          | PreStwick | 3        | H   | 4      | -0.536    | 0.341           |
| 1271 | Ornidazole                                | PreStwick | 3        | A   | 5      | -1.476    | 0.563           |
| 1272 | Alverine citrate salt                     | PreStwick | 3        | B   | 5      | -0.591    | 0.618           |
| 1273 | Methocarbamol                             | PreStwick | 3        | C   | 5      | 0.917     | 0.046           |
| 1274 | Nimesulide                                | PreStwick | 3        | D   | 5      | 0.572     | 0.966           |
| 1275 | Flumequine                                | PreStwick | 3        | E   | 5      | 0.892     | 0.781           |
| 1276 | Gemfibrozil                               | PreStwick | 3        | F   | 5      | 0.017     | 0.728           |
| 1277 | Oxymetazoline hydrochloride               | PreStwick | 3        | G   | 5      | 0.18      | 0.888           |
| 1278 | Chlorpheniramine carbamate                | PreStwick | 3        | H   | 5      | -0.76     | 1.119           |
| 1279 | Ethosuximide                              | PreStwick | 3        | A   | 6      | 0.06      | 0.63            |
| 1280 | Acetofenac                                | PreStwick | 3        | B   | 6      | 0.458     | 0.113           |
| 1281 | Aztreonam                                 | PreStwick | 3        | C   | 6      | 0.46      | 0.318           |
| 1282 | Hydrastinine hydrochloride                | PreStwick | 3        | D   | 6      | 0.82      | -0.166          |
| 1283 | Tofenamic acid                            | PreStwick | 3        | E   | 6      | 0.566     | -0.325          |
| 1284 | Mefexamide hydrochloride                  | PreStwick | 3        | F   | 6      | 0.268     | 0.899           |
| 1285 | Nifenazone                                | PreStwick | 3        | G   | 6      | 0.203     | 0.331           |
| 1286 | Metampicillin sodium salt                 | PreStwick | 3        | H   | 6      | -0.546    | -0.141          |
| 1287 | Mafenide hydrochloride                    | PreStwick | 3        | A   | 7      | -0.245    | -1.357          |
| 1288 | Iproniadide phosphate                     | PreStwick | 3        | B   | 7      | -0.623    | 0.77            |
| 1289 | Cloxacillin sodium salt                   | PreStwick | 3        | C   | 7      | 0.27      | 1.031           |
| 1290 | Pentoxifylline                            | PreStwick | 3        | D   | 7      | 0.343     | -0.111          |
| 1291 | Meclofenamic acid sodium salt monohydrate | PreStwick | 3        | E   | 7      | -0.187    | -0.048          |
| 1292 | Niapride hydrochloride                    | PreStwick | 3        | F   | 7      | -0.338    | -0.381          |
| 1293 | Grissofulvin                              | PreStwick | 3        | G   | 7      | -0.178    | -0.263          |
| 1294 | Dilazep dihydrochloride                   | PreStwick | 3        | H   | 7      | -1.002    | 0.445           |
| 1295 | Riluzole hydrochloride                    | PreStwick | 3        | A   | 8      | -0.695    | -0.02           |
| 1296 | Sulfamethoxazole                          | PreStwick | 3        | B   | 8      | 0.958     | 0.138           |
| 1297 | Catharanthine                             | PreStwick | 3        | C   | 8      | 0.734     | 0.082           |
| 1298 | Metaraminol bitartrate                    | PreStwick | 3        | D   | 8      | 0.616     | -0.44           |
| 1299 | Tibolone                                  | PreStwick | 3        | E   | 8      | 0.261     | -0.024          |
| 1300 | Mebendazole                               | PreStwick | 3        | F   | 8      | 0.319     | -2.481          |
| 1301 | Clemizole hydrochloride                   | PreStwick | 3        | G   | 8      | -0.921    | -0.054          |
| 1302 | Ofloxacin                                 | PreStwick | 3        | H   | 8      | -1.437    | -0.384          |
| 1303 | Nitrofurantoin                            | PreStwick | 3        | A   | 9      | -0.326    | 0.036           |
| 1304 | Mephensin                                 | PreStwick | 3        | B   | 9      | -0.046    | -0.074          |
| 1305 | Pentolinium bitartrate                    | PreStwick | 3        | C   | 9      | 0.426     | 0.591           |
| 1306 | Salbutamol                                | PreStwick | 3        | D   | 9      | 0.695     | -0.167          |
| 1307 | Trimethoprim                              | PreStwick | 3        | E   | 9      | -0.491    | 0.385           |
| 1308 | Fenbuten                                  | PreStwick | 3        | F   | 9      | 0.204     | -0.167          |
| 1309 | Tropicamide                               | PreStwick | 3        | G   | 9      | -0.047    | -0.106          |
| 1310 | Lomexoxacin hydrochloride                 | PreStwick | 3        | H   | 9      | -0.096    | -0.611          |
| 1311 | Hydralazine hydrochloride                 | PreStwick | 3        | A   | 10     | -0.798    | 0.166           |
| 1312 | Phenformin hydrochloride                  | PreStwick | 3        | B   | 10     | -0.325    | 0.598           |
| 1313 | Aminopurine, 6-benzyl                     | PreStwick | 3        | C   | 10     | -0.236    | 0.63            |
| 1314 | Prilocaine hydrochloride                  | PreStwick | 3        | D   | 10     | -0.298    | 0.952           |



SUPPLEMENTARY DATA

|      | Name                                 | Library   | Plate No | Row | Column | ROS score | viability score |
|------|--------------------------------------|-----------|----------|-----|--------|-----------|-----------------|
| 1315 | Metoclopramide monohydrochloride     | PreStwick | 3        | E   | 10     | -0.47     | 0.288           |
| 1316 | Ketoprofen                           | PreStwick | 3        | F   | 10     | -0.984    | 0.032           |
| 1317 | Nefopam hydrochloride                | PreStwick | 3        | G   | 10     | 0.13      | 0.215           |
| 1318 | Orphenadrine hydrochloride           | PreStwick | 3        | H   | 10     | -0.922    | 1.749           |
| 1319 | Phenazine sulfate                    | PreStwick | 3        | A   | 11     | -1.334    | -0.313          |
| 1320 | Flutamide                            | PreStwick | 3        | B   | 11     | 0.881     | -1.053          |
| 1321 | Tolbutamide                          | PreStwick | 3        | C   | 11     | 0.133     | -1.059          |
| 1322 | Campothecin (±)                      | PreStwick | 3        | D   | 11     | 0.731     | -3.003          |
| 1323 | Fanbendazole                         | PreStwick | 3        | E   | 11     | 0.319     | -2.958          |
| 1324 | Indapamide                           | PreStwick | 3        | F   | 11     | 0.018     | -1.453          |
| 1325 | Phenolamine hydrochloride            | PreStwick | 3        | G   | 11     | -0.113    | -2.78           |
| 1326 | Progumide                            | PreStwick | 3        | H   | 11     | -0.94     | -0.959          |
| 1327 | Maxiteline hydrochloride             | PreStwick | 4        | A   | 2      | -2.29     | 0.245           |
| 1328 | Chlorothiazide                       | PreStwick | 4        | B   | 2      | -0.884    | 1.054           |
| 1329 | Ethileterone                         | PreStwick | 4        | C   | 2      | 0.355     | 0.567           |
| 1330 | Vincamine                            | PreStwick | 4        | D   | 2      | 0.776     | 1.208           |
| 1331 | Fludrocortisone acetate              | PreStwick | 4        | E   | 2      | 0.66      | 1.073           |
| 1332 | Dantrolene sodium salt               | PreStwick | 4        | F   | 2      | -0.056    | 2.062           |
| 1333 | Lidolopril                           | PreStwick | 4        | G   | 2      | -1.743    | 1.11            |
| 1334 | ifenprodil tartrate                  | PreStwick | 4        | H   | 2      | -1.533    | 1.903           |
| 1335 | Flavoxate hydrochloride              | PreStwick | 4        | A   | 3      | -1.239    | 0.001           |
| 1336 | Diphenidol hydrochloride             | PreStwick | 4        | B   | 3      | -0.346    | 1.082           |
| 1337 | Triprolidine hydrochloride           | PreStwick | 4        | C   | 3      | -0.457    | 0.874           |
| 1338 | Indomethacin                         | PreStwick | 4        | D   | 3      | 0.751     | 1.134           |
| 1339 | Fenoterol hydrobromide               | PreStwick | 4        | E   | 3      | 0.552     | 1.307           |
| 1340 | Trazodone hydrochloride              | PreStwick | 4        | F   | 3      | -0.708    | 1.367           |
| 1341 | Lincomycin hydrochloride             | PreStwick | 4        | G   | 3      | -0.051    | 1.297           |
| 1342 | Flunarizine dihydrochloride          | PreStwick | 4        | H   | 3      | -0.541    | 0.504           |
| 1343 | Bufexamac                            | PreStwick | 4        | A   | 4      | 0.195     | -0.483          |
| 1344 | Norethindrone                        | PreStwick | 4        | B   | 4      | -0.446    | -0.304          |
| 1345 | Doxapin hydrochloride                | PreStwick | 4        | C   | 4      | 0.355     | 0.008           |
| 1346 | Cordazone                            | PreStwick | 4        | D   | 4      | 0.222     | -0.077          |
| 1347 | Homochlorcyclizine dihydrochloride   | PreStwick | 4        | E   | 4      | 0.533     | 0.447           |
| 1348 | Glafeline hydrochloride              | PreStwick | 4        | F   | 4      | 0.656     | 0.496           |
| 1349 | Telenzapine dihydrochloride          | PreStwick | 4        | G   | 4      | 0.265     | 0.412           |
| 1350 | Trifluoperazine dihydrochloride      | PreStwick | 4        | H   | 4      | -2.587    | -0.656          |
| 1351 | Glutethimide, para-amino             | PreStwick | 4        | A   | 5      | -0.929    | 0.535           |
| 1352 | Nortriptyline hydrochloride          | PreStwick | 4        | B   | 5      | 0.804     | -0.131          |
| 1353 | Dyclonine hydrochloride              | PreStwick | 4        | C   | 5      | 0.127     | 0.052           |
| 1354 | Prednisolone                         | PreStwick | 4        | D   | 5      | -0.079    | 0.515           |
| 1355 | Diethylocarbazine citrate            | PreStwick | 4        | E   | 5      | 0.072     | -0.225          |
| 1356 | Pimethixene maleate                  | PreStwick | 4        | F   | 5      | 0.126     | -0.162          |
| 1357 | Econazole nitrate                    | PreStwick | 4        | G   | 5      | -0.667    | 0.385           |
| 1358 | Enalapril maleate                    | PreStwick | 4        | H   | 5      | -1.488    | 0.82            |
| 1359 | Dropropizine (R,S)                   | PreStwick | 4        | A   | 6      | 0.882     | 0.636           |
| 1360 | Niflumic acid                        | PreStwick | 4        | B   | 6      | -0.113    | -0.166          |
| 1361 | Dimenhydrinate                       | PreStwick | 4        | C   | 6      | 1.333     | -0.126          |
| 1362 | Fenofibrate                          | PreStwick | 4        | D   | 6      | 0.434     | -0.263          |
| 1363 | Chenodiol                            | PreStwick | 4        | E   | 6      | 0.552     | 0.113           |
| 1364 | Pergolide mesylate                   | PreStwick | 4        | F   | 6      | 1.224     | -0.468          |
| 1365 | Bupivacaine hydrochloride            | PreStwick | 4        | G   | 6      | -0.177    | 0.639           |
| 1366 | Minocycline hydrochloride            | PreStwick | 4        | H   | 6      | -1.66     | -1.488          |
| 1367 | Pinacidil                            | PreStwick | 4        | A   | 7      | -1.554    | -1.112          |
| 1368 | Isotretinoin                         | PreStwick | 4        | B   | 7      | -0.163    | -1.009          |
| 1369 | Disopyramide                         | PreStwick | 4        | C   | 7      | 0.132     | 0.007           |
| 1370 | Bumetanide                           | PreStwick | 4        | D   | 7      | 0.868     | -0.041          |
| 1371 | Perhexiline maleate                  | PreStwick | 4        | E   | 7      | 1.097     | 0.212           |
| 1372 | Acemetacin                           | PreStwick | 4        | F   | 7      | 0.401     | 1.095           |
| 1373 | Clemastine fumarate                  | PreStwick | 4        | G   | 7      | -0.226    | 0.461           |
| 1374 | Gilbenclamide                        | PreStwick | 4        | H   | 7      | -1.295    | 0.234           |
| 1375 | Albendazole                          | PreStwick | 4        | A   | 8      | -1.502    | -0.978          |
| 1376 | Retinol acid                         | PreStwick | 4        | B   | 8      | 1.472     | -1.176          |
| 1377 | Clofibrate                           | PreStwick | 4        | C   | 8      | 0.481     | -0.82           |
| 1378 | Labetalol hydrochloride              | PreStwick | 4        | D   | 8      | 0.058     | 0.126           |
| 1379 | Oxybutynin chloride                  | PreStwick | 4        | E   | 8      | -0.374    | -1.04           |
| 1380 | Banzhydamine hydrochloride           | PreStwick | 4        | F   | 8      | 0.894     | -0.945          |
| 1381 | Oxytetracycline dihydrate            | PreStwick | 4        | G   | 8      | -0.572    | -0.726          |
| 1382 | Guanethidine sulfate                 | PreStwick | 4        | H   | 8      | -1.766    | -1.067          |
| 1383 | Clonidine hydrochloride              | PreStwick | 4        | A   | 9      | -0.215    | -0.664          |
| 1384 | Antazoline hydrochloride             | PreStwick | 4        | B   | 9      | -0.697    | -0.543          |
| 1385 | Vinpocetine                          | PreStwick | 4        | C   | 9      | 0.255     | -0.155          |
| 1386 | Cinnarizine                          | PreStwick | 4        | D   | 9      | -0.013    | -0.461          |
| 1387 | Splperone                            | PreStwick | 4        | E   | 9      | 0.534     | -1.019          |
| 1388 | Pipexide hydrochloride               | PreStwick | 4        | F   | 9      | 0.383     | -0.335          |
| 1389 | Pimozide                             | PreStwick | 4        | G   | 9      | 0.43      | 0.166           |
| 1390 | Quinacrine dihydrochloride dihydrate | PreStwick | 4        | H   | 9      | -1.301    | -0.323          |
| 1391 | Bupropion hydrochloride              | PreStwick | 4        | A   | 10     | -0.636    | -1.244          |
| 1392 | Ethacrynic acid                      | PreStwick | 4        | B   | 10     | 0.16      | -0.328          |
| 1393 | Clomipramine hydrochloride           | PreStwick | 4        | C   | 10     | 0.505     | 0.138           |
| 1394 | Methylprednisolone, 6-alpha          | PreStwick | 4        | D   | 10     | 1.547     | 0.417           |
| 1395 | Pyrimilamine maleate                 | PreStwick | 4        | E   | 10     | 0.4       | 0.294           |
| 1396 | Mifepristone                         | PreStwick | 4        | F   | 10     | 0.625     | 1.303           |
| 1397 | Amodiaquin dihydrochloride dihydrate | PreStwick | 4        | G   | 10     | 0.754     | 0.533           |
| 1398 | Clofyllum tosylate                   | PreStwick | 4        | H   | 10     | 1.843     | -5.642          |
| 1399 | Alprenolol hydrochloride             | PreStwick | 4        | A   | 11     | -0.756    | -1.037          |
| 1400 | Praziquantel                         | PreStwick | 4        | B   | 11     | 0.408     | -0.216          |
| 1401 | Fandiline hydrochloride              | PreStwick | 4        | C   | 11     | -1.089    | -0.462          |
| 1402 | Quinidine hydrochloride monohydrate  | PreStwick | 4        | D   | 11     | 0.265     | -0.536          |
| 1403 | Sulfipyrazone                        | PreStwick | 4        | E   | 11     | 1.022     | 0.034           |
| 1404 | Diperodon hydrochloride              | PreStwick | 4        | F   | 11     | 0.31      | -0.536          |
| 1405 | Mebexertine hydrochloride            | PreStwick | 4        | G   | 11     | -0.427    | 0.204           |
| 1406 | Fluphenazine dihydrochloride         | PreStwick | 4        | H   | 11     | -1.85     | -0.366          |
| 1407 | Streptomycin sulfate                 | PreStwick | 5        | A   | 2      | -1.046    | 0.865           |
| 1408 | Tremorin dihydrochloride             | PreStwick | 5        | B   | 2      | -0.203    | 1.215           |
| 1409 | Furosemide                           | PreStwick | 5        | C   | 2      | -0.886    | 1.441           |
| 1410 | Chlorthalidone                       | PreStwick | 5        | D   | 2      | 0.889     | 1.455           |
| 1411 | Bambuterol hydrochloride             | PreStwick | 5        | E   | 2      | 0.233     | 1.498           |
| 1412 | Ketotifen fumarate                   | PreStwick | 5        | F   | 2      | -0.783    | 1.667           |
| 1413 | Lidoflazine                          | PreStwick | 5        | G   | 2      | -0.309    | 1.773           |
| 1414 | Terbutaline hemisulfate              | PreStwick | 5        | H   | 2      | -1.471    | 1.299           |
| 1415 | Alfuzosin hydrochloride              | PreStwick | 5        | A   | 3      | -1.099    | -0.241          |
| 1416 | Practolol                            | PreStwick | 5        | B   | 3      | -0.844    | 0.166           |
| 1417 | Mathapyllene hydrochloride           | PreStwick | 5        | C   | 3      | 0.505     | -0.755          |
| 1418 | Dobutamine hydrochloride             | PreStwick | 5        | D   | 3      | 0.093     | 0.843           |
| 1419 | Betamethasone                        | PreStwick | 5        | E   | 3      | 1.01      | -2.834          |

SUPPLEMENTARY DATA

|      | Name                                      | Library   | Plate No | Row | Column | ROS score | viability score |
|------|-------------------------------------------|-----------|----------|-----|--------|-----------|-----------------|
| 1420 | Debrisoquin sulfate                       | Prestwick | 5        | F   | 3      | 0.377     | 1.078           |
| 1421 | Betaxolol hydrochloride                   | Prestwick | 5        | G   | 3      | 0.249     | 1.085           |
| 1422 | Ketanserin tartrate hydrate               | Prestwick | 5        | H   | 3      | -0.159    | 0.555           |
| 1423 | Chlorpropamide                            | Prestwick | 5        | A   | 4      | -1.197    | 0.038           |
| 1424 | Zidovudine, AZT                           | Prestwick | 5        | B   | 4      | 0.094     | -0.104          |
| 1425 | Desipramine hydrochloride                 | Prestwick | 5        | C   | 4      | 0.008     | 0.767           |
| 1426 | Moclobemide                               | Prestwick | 5        | D   | 4      | 0.05      | 1.163           |
| 1427 | Colchicine                                | Prestwick | 5        | E   | 4      | 0.779     | -0.566          |
| 1428 | Amethopterin (R,S)                        | Prestwick | 5        | F   | 4      | 0.065     | -0.077          |
| 1429 | Nitroglycerin hydrochloride               | Prestwick | 5        | G   | 4      | -0.267    | 0.708           |
| 1430 | Hemicholinium bromide                     | Prestwick | 5        | H   | 4      | -1.265    | 0.08            |
| 1431 | Phenylpropanolamine hydrochloride         | Prestwick | 5        | A   | 5      | -1.587    | -0.204          |
| 1432 | Sulfisoxazole                             | Prestwick | 5        | B   | 5      | -0.911    | 0.554           |
| 1433 | Clomiprine hydrochloride                  | Prestwick | 5        | C   | 5      | 0.208     | 0.027           |
| 1434 | Clozapine                                 | Prestwick | 5        | D   | 5      | 0.663     | 0.217           |
| 1435 | Mefenquine                                | Prestwick | 5        | E   | 5      | -0.229    | 0.282           |
| 1436 | Methylergometrine maleate                 | Prestwick | 5        | F   | 5      | -0.052    | 0.231           |
| 1437 | Probucol                                  | Prestwick | 5        | G   | 5      | -0.11     | 0.58            |
| 1438 | Kanamycin A sulfate                       | Prestwick | 5        | H   | 5      | -0.705    | 0.558           |
| 1439 | Ascorbic acid                             | Prestwick | 5        | A   | 6      | -0.797    | -0.463          |
| 1440 | Zaprinast                                 | Prestwick | 5        | B   | 6      | -0.017    | 0.192           |
| 1441 | Clenbuterol hydrochloride                 | Prestwick | 5        | C   | 6      | -0.135    | 0.39            |
| 1442 | Hydanthone                                | Prestwick | 5        | D   | 6      | 0.127     | 0.486           |
| 1443 | Erizolamide                               | Prestwick | 5        | E   | 6      | -0.087    | 0.67            |
| 1444 | Methiohepl maleate                        | Prestwick | 5        | F   | 6      | -0.247    | 0.361           |
| 1445 | Mitoxantrone dihydrochloride              | Prestwick | 5        | G   | 6      | -0.335    | -1.821          |
| 1446 | Zimklacin hydrate                         | Prestwick | 5        | H   | 6      | -1.978    | 0.45            |
| 1447 | Methyldopa (L-)                           | Prestwick | 5        | A   | 7      | -1.18     | -0.218          |
| 1448 | Chlormezanone                             | Prestwick | 5        | B   | 7      | 0.057     | -0.214          |
| 1449 | Maprotiline hydrochloride                 | Prestwick | 5        | C   | 7      | 0.876     | 0.502           |
| 1450 | Adenosine 5'-monophosphate monohydrate    | Prestwick | 5        | D   | 7      | 0.01      | 0.644           |
| 1451 | Amboxol hydrochloride                     | Prestwick | 5        | E   | 7      | 0.18      | 0.715           |
| 1452 | Clofazimine                               | Prestwick | 5        | F   | 7      | 0.416     | 0.512           |
| 1453 | GSB 12505 dihydrochloride                 | Prestwick | 5        | G   | 7      | 0.28      | 0.585           |
| 1454 | Etoposide                                 | Prestwick | 5        | H   | 7      | -0.813    | -0.332          |
| 1455 | Calciperazone dihydrate                   | Prestwick | 5        | A   | 8      | -0.987    | -0.625          |
| 1456 | Procalnamide hydrochloride                | Prestwick | 5        | B   | 8      | -0.042    | 0.341           |
| 1457 | Thioguanosine                             | Prestwick | 5        | C   | 8      | 1.675     | -0.419          |
| 1458 | Amoxicillin                               | Prestwick | 5        | D   | 8      | 0.333     | -0.367          |
| 1459 | Bemfluorex hydrochloride                  | Prestwick | 5        | E   | 8      | -0.697    | -0.244          |
| 1460 | Naltronyl oxalate                         | Prestwick | 5        | F   | 8      | 0.036     | 0.186           |
| 1461 | Carbatapentane citrate                    | Prestwick | 5        | G   | 8      | 0.065     | 0.174           |
| 1462 | Clomiphene citrate (Z,E)                  | Prestwick | 5        | H   | 8      | -1.396    | 0.686           |
| 1463 | Zoxazolamine                              | Prestwick | 5        | A   | 9      | -0.92     | -0.441          |
| 1464 | N6-methyladenosine                        | Prestwick | 5        | B   | 9      | 0.75      | -0.403          |
| 1465 | Chlorprothixene hydrochloride             | Prestwick | 5        | C   | 9      | 0.313     | -0.559          |
| 1466 | Cephalexin monohydrate                    | Prestwick | 5        | D   | 9      | 0.518     | 0.078           |
| 1467 | Bupropion hydrochloride                   | Prestwick | 5        | E   | 9      | 0.802     | -0.228          |
| 1468 | Bisulfate                                 | Prestwick | 5        | F   | 9      | 0.976     | 0.171           |
| 1469 | Bequalinium dichloride                    | Prestwick | 5        | G   | 9      | 2.537     | -8.226          |
| 1470 | Oxantel pamoate                           | Prestwick | 5        | H   | 9      | -1.309    | -0.055          |
| 1471 | Tacrine hydrochloride hydrate             | Prestwick | 5        | A   | 10     | -0.801    | -0.801          |
| 1472 | Guanfacine hydrochloride                  | Prestwick | 5        | B   | 10     | 0.255     | -1.2            |
| 1473 | Ritodrine hydrochloride                   | Prestwick | 5        | C   | 10     | 0.161     | -0.302          |
| 1474 | Dextromethorphan hydrobromide monohydrate | Prestwick | 5        | D   | 10     | 0.735     | -1.586          |
| 1475 | Maloxicam                                 | Prestwick | 5        | E   | 10     | -0.451    | -0.344          |
| 1476 | Nefazodone HCl                            | Prestwick | 5        | F   | 10     | 0.663     | -0.308          |
| 1477 | Ketoconazole                              | Prestwick | 5        | G   | 10     | 0.73      | -0.68           |
| 1478 | Prochlorperazine dimaleate                | Prestwick | 5        | H   | 10     | -1.336    | 0.242           |
| 1479 | Bisoprolol fumarate                       | Prestwick | 5        | A   | 11     | -1.072    | -0.149          |
| 1480 | Domperidone                               | Prestwick | 5        | B   | 11     | 0.742     | 0.198           |
| 1481 | Clozapine                                 | Prestwick | 5        | C   | 11     | 0.735     | -0.558          |
| 1482 | Droperidol                                | Prestwick | 5        | D   | 11     | 0.514     | -0.824          |
| 1483 | Benzbromarone                             | Prestwick | 5        | E   | 11     | 0.34      | -0.875          |
| 1484 | Cleopride maleate                         | Prestwick | 5        | F   | 11     | 0.087     | -1.082          |
| 1485 | Fusidic acid sodium salt                  | Prestwick | 5        | G   | 11     | 0.069     | -0.962          |
| 1486 | Heperidin                                 | Prestwick | 5        | H   | 11     | -1.765    | -0.692          |
| 1487 | Testosterone propionate                   | Prestwick | 6        | A   | 2      | -2.562    | 0.378           |
| 1488 | Androsterone                              | Prestwick | 6        | B   | 2      | -0.705    | 0.787           |
| 1489 | Suloctidil                                | Prestwick | 6        | C   | 2      | 1.277     | 1.218           |
| 1490 | Pefloxacin                                | Prestwick | 6        | D   | 2      | 0.161     | 1.169           |
| 1491 | Estradiol-17 beta                         | Prestwick | 6        | E   | 2      | 0.201     | 1.134           |
| 1492 | Allzapride HCl                            | Prestwick | 6        | F   | 2      | -0.38     | 1.779           |
| 1493 | Tropisetron HCl                           | Prestwick | 6        | G   | 2      | -0.539    | 1.216           |
| 1494 | Vatalanb                                  | Prestwick | 6        | H   | 2      | -1.18     | 1.516           |
| 1495 | Arecolline hydrobromide                   | Prestwick | 6        | A   | 3      | 0.678     | -0.515          |
| 1496 | Amifostine                                | Prestwick | 6        | B   | 3      | -1.15     | 1.125           |
| 1497 | Zotepine                                  | Prestwick | 6        | C   | 3      | 0.427     | 0.505           |
| 1498 | Corticosterone                            | Prestwick | 6        | D   | 3      | 0.469     | 1.365           |
| 1499 | Clobutinol hydrochloride                  | Prestwick | 6        | E   | 3      | 0.812     | 0.082           |
| 1500 | Stanozolol                                | Prestwick | 6        | F   | 3      | 0.048     | 0.895           |
| 1501 | Cefixime                                  | Prestwick | 6        | G   | 3      | 0.308     | 0.333           |
| 1502 | Itopride                                  | Prestwick | 6        | H   | 3      | -0.033    | 1.061           |
| 1503 | Thyroxine (L)                             | Prestwick | 6        | A   | 4      | -0.817    | -0.531          |
| 1504 | Carbarone                                 | Prestwick | 6        | B   | 4      | -0.69     | -0.53           |
| 1505 | Carisoprodol                              | Prestwick | 6        | C   | 4      | 1.22      | 0.151           |
| 1506 | Cyanocobalamin                            | Prestwick | 6        | D   | 4      | -0.185    | 0.405           |
| 1507 | Gabazine                                  | Prestwick | 6        | E   | 4      | 1.451     | -0.587          |
| 1508 | Calcipotriene                             | Prestwick | 6        | F   | 4      | 0.624     | 0.088           |
| 1509 | Metrizamide                               | Prestwick | 6        | G   | 4      | 0.41      | 0.177           |
| 1510 | Cefotetan                                 | Prestwick | 6        | H   | 4      | -1.724    | 0.244           |
| 1511 | Idebenone                                 | Prestwick | 6        | A   | 5      | -1.754    | 1.153           |
| 1512 | Amlodipine                                | Prestwick | 6        | B   | 5      | 0.825     | 0.297           |
| 1513 | Cephalosporanic acid, 7-amino             | Prestwick | 6        | C   | 5      | 0.283     | -0.196          |
| 1514 | Cefadroxil                                | Prestwick | 6        | D   | 5      | 1.146     | -0.089          |
| 1515 | Oxcarbazepine                             | Prestwick | 6        | E   | 5      | -0.188    | 0.388           |
| 1516 | Linezolid                                 | Prestwick | 6        | F   | 5      | -0.138    | 0.566           |
| 1517 | Quetiapine                                | Prestwick | 6        | G   | 5      | 0.922     | 0.26            |
| 1518 | Fentazac                                  | Prestwick | 6        | H   | 5      | -0.309    | 1.669           |
| 1519 | Peptatrin A                               | Prestwick | 6        | A   | 6      | -1.406    | 1.201           |
| 1520 | Modafinil                                 | Prestwick | 6        | B   | 6      | 0.069     | 0.378           |
| 1521 | Chicago sky blue 6B                       | Prestwick | 6        | C   | 6      | 0.418     | 0.118           |
| 1522 | Cyclosporin A                             | Prestwick | 6        | D   | 6      | 0.096     | -0.878          |
| 1523 | Cyclobenzaprine hydrochloride             | Prestwick | 6        | E   | 6      | 0.589     | -0.145          |
| 1524 | Mebhydroline 1,5-naphthalenedisulfonate   | Prestwick | 6        | F   | 6      | 0.638     | 0.53            |

SUPPLEMENTARY DATA

|      | Name                                                                   | Library   | Plate No | Row | Column | ROS score | viability score |
|------|------------------------------------------------------------------------|-----------|----------|-----|--------|-----------|-----------------|
| 1525 | Tosufloxacin hydrochloride                                             | Prestwick | 6        | G   | 6      | -0.287    | -0.794          |
| 1526 | Brompheniramine maleate                                                | Prestwick | 6        | H   | 6      | -1.944    | -0.342          |
| 1527 | SR-55635A                                                              | Prestwick | 6        | A   | 7      | -0.482    | -0.275          |
| 1528 | Bacampicillin hydrochloride                                            | Prestwick | 6        | B   | 7      | -0.591    | -0.242          |
| 1529 | Bulfomediil hydrochloride                                              | Prestwick | 6        | C   | 7      | -0.881    | -0.497          |
| 1530 | Digitoxigenin                                                          | Prestwick | 6        | D   | 7      | -0.17     | 0.098           |
| 1531 | Carteolol hydrochloride                                                | Prestwick | 6        | E   | 7      | -0.702    | 0.05            |
| 1532 | Mediocycline sulfosalicylate                                           | Prestwick | 6        | F   | 7      | -0.146    | 0.126           |
| 1533 | Efavirenz                                                              | Prestwick | 6        | G   | 7      | -0.422    | 0.193           |
| 1534 | Primaquine diphosphate                                                 | Prestwick | 6        | H   | 7      | -1.34     | 0.624           |
| 1535 | Adamantamine fumarate                                                  | Prestwick | 6        | A   | 8      | 0.148     | -1.004          |
| 1536 | Lamivudine                                                             | Prestwick | 6        | B   | 8      | -0.792    | -0.14           |
| 1537 | Dibenzapine hydrochloride                                              | Prestwick | 6        | C   | 8      | 0.676     | -0.986          |
| 1538 | Digoxin                                                                | Prestwick | 6        | D   | 8      | 0.902     | -1.108          |
| 1539 | Hydrocortisone base                                                    | Prestwick | 6        | E   | 8      | 0.402     | -1.134          |
| 1540 | Medcozine dihydrochloride                                              | Prestwick | 6        | F   | 8      | 0.759     | -1.041          |
| 1541 | Rifapentine                                                            | Prestwick | 6        | G   | 8      | -0.187    | -0.353          |
| 1542 | Progesterone                                                           | Prestwick | 6        | H   | 8      | -1.878    | -0.131          |
| 1543 | Butoconazole nitrate                                                   | Prestwick | 6        | A   | 9      | 0.081     | 0.291           |
| 1544 | Biotin                                                                 | Prestwick | 6        | B   | 9      | 0.562     | 0.503           |
| 1545 | Roxatidine Acetate HCl                                                 | Prestwick | 6        | C   | 9      | 0.62      | -0.364          |
| 1546 | Doxorubicin hydrochloride                                              | Prestwick | 6        | D   | 9      | 3.674     | -6.27           |
| 1547 | Hydroxytetrine maleate (R,S)                                           | Prestwick | 6        | E   | 9      | 0.867     | -0.448          |
| 1548 | Malatonin                                                              | Prestwick | 6        | F   | 9      | 0.592     | -0.615          |
| 1549 | Neostigmine bromide                                                    | Prestwick | 6        | G   | 9      | 0.03      | -0.645          |
| 1550 | Felodipine                                                             | Prestwick | 6        | H   | 9      | -0.908    | -0.369          |
| 1551 | Amlodarone hydrochloride                                               | Prestwick | 6        | A   | 10     | -0.489    | -1.296          |
| 1552 | Bisacodyl                                                              | Prestwick | 6        | B   | 10     | 0.304     | -0.692          |
| 1553 | Cholecalciferol                                                        | Prestwick | 6        | C   | 10     | 0.942     | 0.084           |
| 1554 | Carbimazole                                                            | Prestwick | 6        | D   | 10     | 0.845     | 0.171           |
| 1555 | Pilocarpine nitrate                                                    | Prestwick | 6        | E   | 10     | 0.949     | -0.22           |
| 1556 | Butalbital                                                             | Prestwick | 6        | F   | 10     | 0.662     | -0.744          |
| 1557 | Nifedazole                                                             | Prestwick | 6        | G   | 10     | -0.813    | -0.25           |
| 1558 | Raclopride                                                             | Prestwick | 6        | H   | 10     | -0.181    | -0.525          |
| 1559 | Amphotericin B                                                         | Prestwick | 6        | A   | 11     | -1.667    | -0.513          |
| 1560 | Erlotinib                                                              | Prestwick | 6        | B   | 11     | 0.049     | 0.512           |
| 1561 | Cisapride                                                              | Prestwick | 6        | C   | 11     | 1.402     | -0.052          |
| 1562 | Eplandroterone                                                         | Prestwick | 6        | D   | 11     | -0.689    | -0.088          |
| 1563 | Dicloxacillin sodium salt                                              | Prestwick | 6        | E   | 11     | 0.306     | 0.224           |
| 1564 | Dinoprost trometamol                                                   | Prestwick | 6        | F   | 11     | -0.593    | 0.229           |
| 1565 | Ceforanide                                                             | Prestwick | 6        | G   | 11     | -1.955    | 0.239           |
| 1566 | Cloasantal                                                             | Prestwick | 6        | H   | 11     | -2.959    | -0.858          |
| 1567 | Serotonin hydrochloride                                                | Prestwick | 7        | A   | 2      | -1.665    | -0.201          |
| 1568 | Metixene hydrochloride                                                 | Prestwick | 7        | B   | 2      | -1.465    | 0.363           |
| 1569 | Vigabatrin                                                             | Prestwick | 7        | C   | 2      | 0.097     | 0.731           |
| 1570 | Fluoxetine hydrochloride                                               | Prestwick | 7        | D   | 2      | 0.794     | 0.285           |
| 1571 | Lofexidine                                                             | Prestwick | 7        | E   | 2      | -0.322    | 0.428           |
| 1572 | Pifenperone                                                            | Prestwick | 7        | F   | 2      | 0.834     | 0.661           |
| 1573 | Ciclopirox ethanolamine                                                | Prestwick | 7        | G   | 2      | 2.336     | -3.607          |
| 1574 | Hexetilidina                                                           | Prestwick | 7        | H   | 2      | -1.572    | 0.721           |
| 1575 | Cefotiam hydrochloride                                                 | Prestwick | 7        | A   | 3      | -1.502    | 0.077           |
| 1576 | Nitrofurantol                                                          | Prestwick | 7        | B   | 3      | -1.923    | 0.378           |
| 1577 | Bliperiden hydrochloride                                               | Prestwick | 7        | C   | 3      | -0.911    | 0.706           |
| 1578 | Iohexol                                                                | Prestwick | 7        | D   | 3      | 0.882     | 0.448           |
| 1579 | Thiothrepton                                                           | Prestwick | 7        | E   | 3      | 1.967     | -3.656          |
| 1580 | Isoquinoline, 6,7-dimethoxy-1-methyl-1,2,3,4-tetrahydro, hydrochloride | Prestwick | 7        | F   | 3      | 0.151     | 0.7             |
| 1581 | Probenecid                                                             | Prestwick | 7        | G   | 3      | 0.879     | 0.833           |
| 1582 | Selagiline hydrochloride                                               | Prestwick | 7        | H   | 3      | -1.063    | 0.179           |
| 1583 | Rofecoxib                                                              | Prestwick | 7        | A   | 4      | -1.275    | 0.049           |
| 1584 | Omeprazole                                                             | Prestwick | 7        | B   | 4      | -0.769    | 0.598           |
| 1585 | Cetrizine dihydrochloride                                              | Prestwick | 7        | C   | 4      | 0.108     | 0.13            |
| 1586 | Norcyclobenzaprine                                                     | Prestwick | 7        | D   | 4      | 0.849     | 0.439           |
| 1587 | Mirgitol                                                               | Prestwick | 7        | E   | 4      | -0.759    | 0.785           |
| 1588 | Phenacetin                                                             | Prestwick | 7        | F   | 4      | 0.891     | 0.82            |
| 1589 | Bethahistine mesylate                                                  | Prestwick | 7        | G   | 4      | -0.018    | 0.632           |
| 1590 | Pentamidine isethionate                                                | Prestwick | 7        | H   | 4      | -1.324    | -1.107          |
| 1591 | Benperidol                                                             | Prestwick | 7        | A   | 5      | -1.896    | -0.259          |
| 1592 | Propylthiouracil                                                       | Prestwick | 7        | B   | 5      | -0.092    | 0.53            |
| 1593 | Eflfenin                                                               | Prestwick | 7        | C   | 5      | 0.333     | 0.304           |
| 1594 | Pyrazinamide                                                           | Prestwick | 7        | D   | 5      | 0.037     | 0.568           |
| 1595 | Flabendazole                                                           | Prestwick | 7        | E   | 5      | ?????     | 0.836           |
| 1596 | Atovaquone                                                             | Prestwick | 7        | F   | 5      | -0.372    | 0.82            |
| 1597 | Tobramycin                                                             | Prestwick | 7        | G   | 5      | -0.501    | 0.49            |
| 1598 | Tolazamide                                                             | Prestwick | 7        | H   | 5      | -0.687    | 0.706           |
| 1599 | Cefaclor                                                               | Prestwick | 7        | A   | 6      | -0.668    | -0.147          |
| 1600 | Terconazole                                                            | Prestwick | 7        | B   | 6      | -0.232    | -0.089          |
| 1601 | Mataprotarenol sulfate, orciprenaline sulfate                          | Prestwick | 7        | C   | 6      | -0.608    | 0.403           |
| 1602 | Trimethadione                                                          | Prestwick | 7        | D   | 6      | 0.086     | 0.378           |
| 1603 | Rifampicin                                                             | Prestwick | 7        | E   | 6      | 0.078     | 0.139           |
| 1604 | Mathoxamine hydrochloride                                              | Prestwick | 7        | F   | 6      | -0.518    | 0.44            |
| 1605 | Tetramisole hydrochloride                                              | Prestwick | 7        | G   | 6      | -0.883    | 0.577           |
| 1606 | Nifuroxazide                                                           | Prestwick | 7        | H   | 6      | -1.865    | 0.413           |
| 1607 | Collistin sulfate                                                      | Prestwick | 7        | A   | 7      | -0.382    | -0.357          |
| 1608 | Flaprofenic acid                                                       | Prestwick | 7        | B   | 7      | 0.447     | 0.094           |
| 1609 | Sisomicin sulfate                                                      | Prestwick | 7        | C   | 7      | 1.209     | -0.514          |
| 1610 | Lovastatin                                                             | Prestwick | 7        | D   | 7      | 2.938     | -3.495          |
| 1611 | Ethionamide                                                            | Prestwick | 7        | E   | 7      | 0.324     | 1.261           |
| 1612 | (S)-(-)-Afenolol                                                       | Prestwick | 7        | F   | 7      | 0.571     | 0.188           |
| 1613 | Pregnenolone                                                           | Prestwick | 7        | G   | 7      | -0.33     | 0.459           |
| 1614 | Mirtazapine                                                            | Prestwick | 7        | H   | 7      | -0.537    | 0.502           |
| 1615 | Daunorubicin hydrochloride                                             | Prestwick | 7        | A   | 8      | 1.621     | -3.827          |
| 1616 | Vancomycin hydrochloride                                               | Prestwick | 7        | B   | 8      | -0.514    | 0.006           |
| 1617 | Sibutramine HCl                                                        | Prestwick | 7        | C   | 8      | 1.298     | 0.141           |
| 1618 | Nystatine                                                              | Prestwick | 7        | D   | 8      | 0.574     | -0.001          |
| 1619 | Tenoxicam                                                              | Prestwick | 7        | E   | 8      | 1.304     | -0.559          |
| 1620 | Piracetam                                                              | Prestwick | 7        | F   | 8      | 0.323     | -0.338          |
| 1621 | Molsidomine                                                            | Prestwick | 7        | G   | 8      | 0.254     | -0.73           |
| 1622 | Diflithromycin                                                         | Prestwick | 7        | H   | 8      | -0.742    | -0.13           |
| 1623 | Dosulepin hydrochloride                                                | Prestwick | 7        | A   | 9      | -0.657    | -0.519          |
| 1624 | Artemisinin                                                            | Prestwick | 7        | B   | 9      | -0.469    | -0.153          |
| 1625 | Rasveratrol                                                            | Prestwick | 7        | C   | 9      | -0.014    | -0.023          |
| 1626 | Budaeonide                                                             | Prestwick | 7        | D   | 9      | 1.789     | 0.384           |
| 1627 | Triflusal                                                              | Prestwick | 7        | E   | 9      | 0.245     | 0.508           |
| 1628 | Phenindione                                                            | Prestwick | 7        | F   | 9      | 0.75      | 0.389           |
| 1629 | Chloroquine diphosphate                                                | Prestwick | 7        | G   | 9      | 0.377     | 0.589           |



SUPPLEMENTARY DATA

|      | Name                                   | Library  | Plate No | Row | Column | ROS score | viability score |
|------|----------------------------------------|----------|----------|-----|--------|-----------|-----------------|
| 1630 | Gliclazide                             | Prestwck | 7        | H   | 9      | -1.537    | -0.163          |
| 1631 | Cefazidime pentahydrate                | Prestwck | 7        | A   | 10     | 0.124     | -0.951          |
| 1632 | Propafenone hydrochloride              | Prestwck | 7        | B   | 10     | 0.03      | -1.501          |
| 1633 | Bromperidol                            | Prestwck | 7        | C   | 10     | 0.561     | -0.232          |
| 1634 | milpemet                               | Prestwck | 7        | D   | 10     | 0.37      | 0.375           |
| 1635 | Mesoridazine baseylate                 | Prestwck | 7        | E   | 10     | 0.34      | 0.32            |
| 1636 | Thiocholcholside                       | Prestwck | 7        | F   | 10     | 1.152     | 0.532           |
| 1637 | Trimetazidine dihydrochloride          | Prestwck | 7        | G   | 10     | 0.615     | 0.683           |
| 1638 | DO 89795                               | Prestwck | 7        | H   | 10     | -1.036    | 0.054           |
| 1639 | lobenguanne sulfate                    | Prestwck | 7        | A   | 11     | 0.194     | -1.976          |
| 1640 | Ethinilvan                             | Prestwck | 7        | B   | 11     | 0.317     | -0.314          |
| 1641 | Cyclizine hydrochloride                | Prestwck | 7        | C   | 11     | 0.353     | -0.284          |
| 1642 | Sulfasalazine                          | Prestwck | 7        | D   | 11     | -0.089    | 0.244           |
| 1643 | Trolox                                 | Prestwck | 7        | E   | 11     | -0.12     | 0.209           |
| 1644 | Clorsulon                              | Prestwck | 7        | F   | 11     | -0.419    | 0.233           |
| 1645 | Parthenolide                           | Prestwck | 7        | G   | 11     | -2.259    | 1.153           |
| 1646 | Pranlyamine lactate                    | Prestwck | 7        | H   | 11     | -2.146    | 0.784           |
| 1647 | Ziprasidone Hydrochloride              | Prestwck | 8        | A   | 2      | -2.016    | -0.162          |
| 1648 | Tetracaine hydrochloride               | Prestwck | 8        | B   | 2      | -0.345    | 0.865           |
| 1649 | Raboxatine mesylate                    | Prestwck | 8        | C   | 2      | -0.321    | 1.173           |
| 1650 | Emedastine                             | Prestwck | 8        | D   | 2      | -0.968    | 1.06            |
| 1651 | Tranilast                              | Prestwck | 8        | E   | 2      | 0.162     | 1.192           |
| 1652 | Harmalol hydrochloride dihydrate       | Prestwck | 8        | F   | 2      | -0.533    | 1.72            |
| 1653 | Methoxy- $\beta$ -harmalan             | Prestwck | 8        | G   | 2      | -0.433    | 1.079           |
| 1654 | Alendronate sodium                     | Prestwck | 8        | H   | 2      | -1.382    | 0.874           |
| 1655 | Mevastatin                             | Prestwck | 8        | A   | 3      | 2.669     | -5.53           |
| 1656 | Mometasone furoate                     | Prestwck | 8        | B   | 3      | 0.845     | -0.642          |
| 1657 | Lobekandine hydrochloride              | Prestwck | 8        | C   | 3      | 0.329     | 0.448           |
| 1658 | Etofenamate                            | Prestwck | 8        | D   | 3      | 0.419     | 0.861           |
| 1659 | Trizanidine HCl                        | Prestwck | 8        | E   | 3      | 0.237     | 0.535           |
| 1660 | Harmol hydrochloride monohydrate       | Prestwck | 8        | F   | 3      | 0.279     | 0.638           |
| 1661 | Amisulpride                            | Prestwck | 8        | G   | 3      | -0.299    | 0.666           |
| 1662 | Dipivefrin hydrochloride               | Prestwck | 8        | H   | 3      | -0.748    | 0.537           |
| 1663 | Pyridostigmine iodid                   | Prestwck | 8        | A   | 4      | -0.961    | -0.727          |
| 1664 | Troglitazone                           | Prestwck | 8        | B   | 4      | 0.288     | 0.255           |
| 1665 | Papaverine hydrochloride               | Prestwck | 8        | C   | 4      | 0.973     | -0.396          |
| 1666 | Zaleplon                               | Prestwck | 8        | D   | 4      | 0.184     | 0.177           |
| 1667 | Zahrlukaet                             | Prestwck | 8        | E   | 4      | -0.161    | 0.85            |
| 1668 | Harmine hydrochloride                  | Prestwck | 8        | F   | 4      | 0.274     | -0.277          |
| 1669 | Pyridoxine hydrochloride               | Prestwck | 8        | G   | 4      | -0.245    | 0.568           |
| 1670 | Thiorphan                              | Prestwck | 8        | H   | 4      | -0.536    | 0.508           |
| 1671 | Pentobarbital                          | Prestwck | 8        | A   | 5      | -1.793    | -0.471          |
| 1672 | Diacarbazine                           | Prestwck | 8        | B   | 5      | -0.21     | -0.301          |
| 1673 | Yohimbine hydrochloride                | Prestwck | 8        | C   | 5      | 0.731     | 0.389           |
| 1674 | Diclofenac sodium                      | Prestwck | 8        | D   | 5      | 0.144     | 0.641           |
| 1675 | Butenafine                             | Prestwck | 8        | E   | 5      | 0.032     | 0.186           |
| 1676 | Carbidopa                              | Prestwck | 8        | F   | 5      | -0.991    | 0.588           |
| 1677 | Mercaptopurine                         | Prestwck | 8        | G   | 5      | 0.063     | 0.644           |
| 1678 | Tomoxetine hydrochloride               | Prestwck | 8        | H   | 5      | -0.52     | 0.094           |
| 1679 | Atropine sulfate monohydrate           | Prestwck | 8        | A   | 6      | -1.067    | -0.23           |
| 1680 | Tenatoprazole                          | Prestwck | 8        | B   | 6      | 0.11      | -0.112          |
| 1681 | Lobeline alpha (-) hydrochloride       | Prestwck | 8        | C   | 6      | 0.392     | -0.25           |
| 1682 | Examestane                             | Prestwck | 8        | D   | 6      | -0.052    | 0.046           |
| 1683 | Carbadox                               | Prestwck | 8        | E   | 6      | 1.137     | 0.032           |
| 1684 | Chrysan-1,4-quinone                    | Prestwck | 8        | F   | 6      | 1.24      | 0.792           |
| 1685 | Cytarabine                             | Prestwck | 8        | G   | 6      | 0.234     | -0.622          |
| 1686 | Lapatinib ditosylate                   | Prestwck | 8        | H   | 6      | -1.297    | 0.337           |
| 1687 | Eserine sulfate, physostigmine sulfate | Prestwck | 8        | A   | 7      | -0.522    | 0.076           |
| 1688 | Acetopromazine maleate salt            | Prestwck | 8        | B   | 7      | -0.202    | -0.253          |
| 1689 | Alfacalcidol                           | Prestwck | 8        | C   | 7      | 0.449     | 0.902           |
| 1690 | Convolamine hydrochloride              | Prestwck | 8        | D   | 7      | 0.422     | 0.365           |
| 1691 | Rimantadine                            | Prestwck | 8        | E   | 7      | -0.039    | 0.159           |
| 1692 | Bemecarilum bromide                    | Prestwck | 8        | F   | 7      | 0.063     | 0.34            |
| 1693 | Racecadotril                           | Prestwck | 8        | G   | 7      | 0         | -0.109          |
| 1694 | Peniclovitr                            | Prestwck | 8        | H   | 7      | -1.084    | -0.297          |
| 1695 | Itraconazole                           | Prestwck | 8        | A   | 8      | 1.752     | -3.968          |
| 1696 | Escitalopram                           | Prestwck | 8        | B   | 8      | 0.238     | -0.71           |
| 1697 | Cilostazol                             | Prestwck | 8        | C   | 8      | 0.297     | -0.485          |
| 1698 | Terazosolomide                         | Prestwck | 8        | D   | 8      | -0.009    | -0.034          |
| 1699 | Ebumamonine (-)                        | Prestwck | 8        | E   | 8      | 0.309     | -0.067          |
| 1700 | Quipazine dimaleate salt               | Prestwck | 8        | F   | 8      | -0.326    | 0.502           |
| 1701 | Folic acid                             | Prestwck | 8        | G   | 8      | 0.522     | 0.522           |
| 1702 | Levetiracetam                          | Prestwck | 8        | H   | 8      | -0.002    | -0.148          |
| 1703 | Acarbose                               | Prestwck | 8        | A   | 9      | -0.473    | -0.61           |
| 1704 | Ropinriole HCl                         | Prestwck | 8        | B   | 9      | 0.484     | -0.218          |
| 1705 | Galanthamine hydrobromide              | Prestwck | 8        | C   | 9      | 0.204     | -0.077          |
| 1706 | Xylazine                               | Prestwck | 8        | D   | 9      | -0.031    | 0.183           |
| 1707 | Oxibendazol                            | Prestwck | 8        | E   | 9      | 0.117     | -1.379          |
| 1708 | Acipimox                               | Prestwck | 8        | F   | 9      | -0.234    | 0.663           |
| 1709 | Benazapril HCl                         | Prestwck | 8        | G   | 9      | -0.757    | 0.534           |
| 1710 | Dextfenfluramine hydrochloride         | Prestwck | 8        | H   | 9      | -1.392    | 0.147           |
| 1711 | Entacapone                             | Prestwck | 8        | A   | 10     | -0.538    | -0.116          |
| 1712 | Lacidipine                             | Prestwck | 8        | B   | 10     | 0.175     | 0.403           |
| 1713 | Azalastine HCl                         | Prestwck | 8        | C   | 10     | 0.753     | -0.667          |
| 1714 | Cellprolol HCl                         | Prestwck | 8        | D   | 10     | 1.016     | 0.692           |
| 1715 | Ipsapirone                             | Prestwck | 8        | E   | 10     | -0.711    | 0.726           |
| 1716 | Dimflorazone Diacetate                 | Prestwck | 8        | F   | 10     | 0.278     | -0.165          |
| 1717 | Anlracetam                             | Prestwck | 8        | G   | 10     | -0.511    | 0.285           |
| 1718 | Etoricoxib                             | Prestwck | 8        | H   | 10     | -0.78     | -0.567          |
| 1719 | Nicotinamide                           | Prestwck | 8        | A   | 11     | -0.7      | -0.345          |
| 1720 | Argatroban                             | Prestwck | 8        | B   | 11     | 0.103     | -1.431          |
| 1721 | Etretinate                             | Prestwck | 8        | C   | 11     | 0.809     | -0.121          |
| 1722 | Zopiclone                              | Prestwck | 8        | D   | 11     | 0.057     | -0.052          |
| 1723 | Harmaline hydrochloride dihydrate      | Prestwck | 8        | E   | 11     | 0.12      | -0.416          |
| 1724 | Harmans hydrochloride                  | Prestwck | 8        | F   | 11     | 0.999     | 0.01            |
| 1725 | Dimethisoquin hydrochloride            | Prestwck | 8        | G   | 11     | -0.445    | -0.004          |
| 1726 | Sertindole                             | Prestwck | 8        | H   | 11     | -0.288    | -2.264          |
| 1727 | Sulmazole                              | Prestwck | 9        | A   | 2      | -1.075    | -0.756          |
| 1728 | Gilmepiride                            | Prestwck | 9        | B   | 2      | -0.119    | -0.576          |
| 1729 | Pranlukast                             | Prestwck | 9        | C   | 2      | -0.139    | -1.796          |
| 1730 | Dydrogasterone                         | Prestwck | 9        | D   | 2      | -0.051    | -1.225          |
| 1731 | Pranoprofen                            | Prestwck | 9        | E   | 2      | 0.867     | -1.704          |
| 1732 | Tylofin                                | Prestwck | 9        | F   | 2      | -0.288    | -1.002          |
| 1733 | Trihexyphenidyl-D,L Hydrochloride      | Prestwck | 9        | G   | 2      | 0.621     | -0.437          |
| 1734 | Sulfabenzamide                         | Prestwck | 9        | H   | 2      | -1.012    | -0.378          |

SUPPLEMENTARY DATA

|      | Name                                    | Library   | Plate No | Row | Column | ROS score | viability score |
|------|-----------------------------------------|-----------|----------|-----|--------|-----------|-----------------|
| 1735 | Gatifloxacin                            | Prestwick | 9        | A   | 3      | -0.368    | 0.659           |
| 1736 | Picrotoxinin                            | Prestwick | 9        | B   | 3      | -0.521    | 0.854           |
| 1737 | Pantollamine                            | Prestwick | 9        | C   | 3      | 0.082     | 0.484           |
| 1738 | Sumatriptan succinate                   | Prestwick | 9        | D   | 3      | -0.75     | 0.932           |
| 1739 | Secnidazole                             | Prestwick | 9        | E   | 3      | -0.515    | 1.489           |
| 1740 | Citalopram Hydrobromide                 | Prestwick | 9        | F   | 3      | -0.77     | 1.526           |
| 1741 | Succinylsulfathiazole                   | Prestwick | 9        | G   | 3      | -0.273    | 1.715           |
| 1742 | Benzocaine                              | Prestwick | 9        | H   | 3      | -0.361    | 1.614           |
| 1743 | Flunitrolide                            | Prestwick | 9        | A   | 4      | 0.071     | -1.502          |
| 1744 | Mepanzolate bromide                     | Prestwick | 9        | B   | 4      | -0.773    | -0.815          |
| 1745 | Zileuton                                | Prestwick | 9        | C   | 4      | 0.858     | -0.834          |
| 1746 | Opipramol dihydrochloride               | Prestwick | 9        | D   | 4      | 0.571     | -0.14           |
| 1747 | Pemoline tartrate                       | Prestwick | 9        | E   | 4      | -0.275    | 0.767           |
| 1748 | Promazine hydrochloride                 | Prestwick | 9        | F   | 4      | -0.855    | 0.545           |
| 1749 | Famprofazone                            | Prestwick | 9        | G   | 4      | -0.097    | 1.198           |
| 1750 | Dipyron                                 | Prestwick | 9        | H   | 4      | -0.161    | 1.107           |
| 1751 | N-Acetyl-DL-homocysteine Thiolactone    | Prestwick | 9        | A   | 5      | -0.278    | -0.052          |
| 1752 | Benfotiamine                            | Prestwick | 9        | B   | 5      | -0.377    | 0.073           |
| 1753 | Loratadine                              | Prestwick | 9        | C   | 5      | 0.211     | 0.58            |
| 1754 | Malidic acid sodium salt                | Prestwick | 9        | D   | 5      | 0.299     | 0.533           |
| 1755 | Clodronate                              | Prestwick | 9        | E   | 5      | -0.384    | 1.548           |
| 1756 | Sulfamerazine                           | Prestwick | 9        | F   | 5      | -0.143    | 1.149           |
| 1757 | Bromoptide                              | Prestwick | 9        | G   | 5      | -0.538    | 1.934           |
| 1758 | Isoorbide dinitrate                     | Prestwick | 9        | H   | 5      | -1.25     | 1.845           |
| 1759 | Flurandrenolide                         | Prestwick | 9        | A   | 6      | 0.1       | -0.833          |
| 1760 | Halcinonide                             | Prestwick | 9        | B   | 6      | 0.535     | -0.505          |
| 1761 | Clindamycin Phosphate                   | Prestwick | 9        | C   | 6      | -0.033    | -0.599          |
| 1762 | Oxacillin Na                            | Prestwick | 9        | D   | 6      | -0.34     | 0.15            |
| 1763 | Nitrazine dihydrochloride               | Prestwick | 9        | E   | 6      | -0.243    | 0.038           |
| 1764 | Vanilaxine                              | Prestwick | 9        | F   | 6      | -0.183    | 0.789           |
| 1765 | Methyl benzethonium chloride            | Prestwick | 9        | G   | 6      | 1.421     | -2.565          |
| 1766 | Sulfachloropyridazine                   | Prestwick | 9        | H   | 6      | -1.577    | 1.289           |
| 1767 | Oxiconazole Nitrate                     | Prestwick | 9        | A   | 7      | -0.261    | -0.531          |
| 1768 | Lanatoside C                            | Prestwick | 9        | B   | 7      | 0.145     | -0.001          |
| 1769 | Nisoldipine                             | Prestwick | 9        | C   | 7      | 0.455     | -0.226          |
| 1770 | Beta-Eacoin                             | Prestwick | 9        | D   | 7      | 0.119     | -0.555          |
| 1771 | Thimerosal                              | Prestwick | 9        | E   | 7      | 2.747     | -3.13           |
| 1772 | Ethotoin                                | Prestwick | 9        | F   | 7      | -0.545    | 0.085           |
| 1773 | Chlorcyclizine hydrochloride            | Prestwick | 9        | G   | 7      | -0.74     | 0.707           |
| 1774 | Pramoxine hydrochloride                 | Prestwick | 9        | H   | 7      | -1.537    | 0.444           |
| 1775 | Kabamipide                              | Prestwick | 9        | A   | 8      | -0.404    | -0.449          |
| 1776 | Benzamil hydrochloride                  | Prestwick | 9        | B   | 8      | -0.583    | -0.239          |
| 1777 | Policosidine                            | Prestwick | 9        | C   | 8      | -0.171    | -0.55           |
| 1778 | Tiludronate disodium                    | Prestwick | 9        | D   | 8      | 0.052     | -0.563          |
| 1779 | Tramadol hydrochloride                  | Prestwick | 9        | E   | 8      | -0.153    | 0.021           |
| 1780 | 3-alpha-Hydroxy-5-beta-androstan-17-one | Prestwick | 9        | F   | 8      | 0.47      | 0.755           |
| 1781 | Diphenylpyraline hydrochloride          | Prestwick | 9        | G   | 8      | -0.045    | 0.713           |
| 1782 | Finasteride                             | Prestwick | 9        | H   | 8      | -1.93     | 0.412           |
| 1783 | Nilvadipine                             | Prestwick | 9        | A   | 9      | 0.1       | 0.173           |
| 1784 | Suxibuzone                              | Prestwick | 9        | B   | 9      | 0.782     | 0.174           |
| 1785 | Acitretin                               | Prestwick | 9        | C   | 9      | 1.073     | 0.089           |
| 1786 | Tazobactam                              | Prestwick | 9        | D   | 9      | 0.85      | -1.476          |
| 1787 | Estropipate                             | Prestwick | 9        | E   | 9      | -0.447    | -0.583          |
| 1788 | Tetrahydrozoline hydrochloride          | Prestwick | 9        | F   | 9      | 0.517     | 0.292           |
| 1789 | Benzethonium chloride                   | Prestwick | 9        | G   | 9      | 2.193     | -2.345          |
| 1790 | Fluorometholone                         | Prestwick | 9        | H   | 9      | 0.004     | 0.22            |
| 1791 | Etanidazole                             | Prestwick | 9        | A   | 10     | -0.572    | -0.146          |
| 1792 | 6-Furfurylaminopurine                   | Prestwick | 9        | B   | 10     | 0.013     | -0.109          |
| 1793 | Zonisamide                              | Prestwick | 9        | C   | 10     | -0.046    | -0.232          |
| 1794 | Ibandronate                             | Prestwick | 9        | D   | 10     | -0.557    | -0.521          |
| 1795 | Butylscopolammonium (n-) bromide        | Prestwick | 9        | E   | 10     | 0.061     | 0.521           |
| 1796 | Hexaestrol                              | Prestwick | 9        | F   | 10     | -0.249    | 0.868           |
| 1797 | Trioxsalen                              | Prestwick | 9        | G   | 10     | -0.558    | 0.897           |
| 1798 | Caphalothin sodium salt                 | Prestwick | 9        | H   | 10     | -1.703    | 0.742           |
| 1799 | Buttiroin disulfate salt                | Prestwick | 9        | A   | 11     | -0.055    | -1.087          |
| 1800 | Avermectin B1a                          | Prestwick | 9        | B   | 11     | 1.369     | -0.877          |
| 1801 | Irsogladine Maleate                     | Prestwick | 9        | C   | 11     | 0.476     | -0.228          |
| 1802 | Warfarin                                | Prestwick | 9        | D   | 11     | 0.007     | -0.358          |
| 1803 | Irinotecan Hydrochloride                | Prestwick | 9        | E   | 11     | -0.119    | -0.154          |
| 1804 | Cefmetazole sodium salt                 | Prestwick | 9        | F   | 11     | -0.881    | 0.155           |
| 1805 | Doxofylline                             | Prestwick | 9        | G   | 11     | -1.407    | 0.439           |
| 1806 | Cefuroxime sodium salt                  | Prestwick | 9        | H   | 11     | -1.404    | -0.16           |
| 1807 | Aithiazide                              | Prestwick | 10       | A   | 2      | -0.732    | 0.458           |
| 1808 | Sulfaguinoxaline sodium salt            | Prestwick | 10       | B   | 2      | -0.359    | 0.787           |
| 1809 | Nadide                                  | Prestwick | 10       | C   | 2      | 0.171     | 0.438           |
| 1810 | Terazosin hydrochloride                 | Prestwick | 10       | D   | 2      | 0.198     | 0.469           |
| 1811 | Butamben                                | Prestwick | 10       | E   | 2      | -0.167    | 0.125           |
| 1812 | Alclometasone dipropionate              | Prestwick | 10       | F   | 2      | -0.209    | -0.043          |
| 1813 | Clobetasol propionate                   | Prestwick | 10       | G   | 2      | 0.47      | 0.485           |
| 1814 | (R)-Naproxen sodium salt                | Prestwick | 10       | H   | 2      | 0.432     | -0.144          |
| 1815 | Isopyrin hydrochloride                  | Prestwick | 10       | A   | 3      | -1.233    | 0.499           |
| 1816 | Streptozotocin                          | Prestwick | 10       | B   | 3      | -0.24     | 0.615           |
| 1817 | Sulfamethizole                          | Prestwick | 10       | C   | 3      | -0.83     | 0.765           |
| 1818 | Phenazopyridine hydrochloride           | Prestwick | 10       | D   | 3      | 0.424     | 0.417           |
| 1819 | Sulfapyridine                           | Prestwick | 10       | E   | 3      | 0.01      | 0.198           |
| 1820 | Leftunomide                             | Prestwick | 10       | F   | 3      | -0.322    | 0.362           |
| 1821 | Podophylotoxin                          | Prestwick | 10       | G   | 3      | 1.054     | -1.098          |
| 1822 | Propidium iodide                        | Prestwick | 10       | H   | 3      | 0.107     | -0.21           |
| 1823 | Phenethicillin potassium salt           | Prestwick | 10       | A   | 4      | -0.305    | 0.169           |
| 1824 | Matoprolol (-)-(-)-tartrate salt        | Prestwick | 10       | B   | 4      | 0.024     | -0.257          |
| 1825 | Medrysone                               | Prestwick | 10       | C   | 4      | 0.09      | 0.454           |
| 1826 | Dameclocycline hydrochloride            | Prestwick | 10       | D   | 4      | 0.514     | -0.019          |
| 1827 | Meclofenoxate hydrochloride             | Prestwick | 10       | E   | 4      | 0.26      | -0.183          |
| 1828 | Norgestrel (-)-D                        | Prestwick | 10       | F   | 4      | -0.323    | -0.297          |
| 1829 | Clofibric acid                          | Prestwick | 10       | G   | 4      | -0.034    | -0.757          |
| 1830 | Cloperastine hydrochloride              | Prestwick | 10       | H   | 4      | -0.491    | -0.893          |
| 1831 | Sulfamethoxy-pyridazine                 | Prestwick | 10       | A   | 5      | -0.531    | 0.216           |
| 1832 | Flumethasone                            | Prestwick | 10       | B   | 5      | 0.349     | 0.387           |
| 1833 | Flunixin meglumine                      | Prestwick | 10       | C   | 5      | -0.282    | 0.535           |
| 1834 | Fenoprofen calcium salt dihydrate       | Prestwick | 10       | D   | 5      | 0.225     | 0.105           |
| 1835 | Furaltadone hydrochloride               | Prestwick | 10       | E   | 5      | 0.08      | 0.492           |
| 1836 | Fluocinolone                            | Prestwick | 10       | F   | 5      | 0.545     | 0.199           |
| 1837 | Bandrolumethiazide                      | Prestwick | 10       | G   | 5      | 0.719     | 0.113           |
| 1838 | Eucatropine hydrochloride               | Prestwick | 10       | H   | 5      | -0.459    | 0.435           |
| 1839 | Deferoxamine mesylate                   | Prestwick | 10       | A   | 6      | -0.031    | 0.815           |

SUPPLEMENTARY DATA

|      | Name                                 | Library   | Plate No | Row | Column | ROS score | viability score |
|------|--------------------------------------|-----------|----------|-----|--------|-----------|-----------------|
| 1840 | Flecainide acetate                   | Prestwick | 10       | B   | 6      | 0.21      | 0.897           |
| 1841 | Spiramycin                           | Prestwick | 10       | C   | 6      | -0.349    | 0.315           |
| 1842 | Piperacillin sodium salt             | Prestwick | 10       | D   | 6      | 0.128     | -0.087          |
| 1843 | Ethoxyquin                           | Prestwick | 10       | E   | 6      | 0.773     | -0.081          |
| 1844 | Sulfamethazine sodium salt           | Prestwick | 10       | F   | 6      | -0.226    | -0.089          |
| 1845 | Dicumarol                            | Prestwick | 10       | G   | 6      | -0.472    | 1.088           |
| 1846 | Isocarboxazid                        | Prestwick | 10       | H   | 6      | -0.501    | 1.741           |
| 1847 | Mephentermine hemisulfate            | Prestwick | 10       | A   | 7      | -1.032    | -0.309          |
| 1848 | Cefazolin sodium salt                | Prestwick | 10       | B   | 7      | -0.531    | 0.125           |
| 1849 | Glycopyrrolate                       | Prestwick | 10       | C   | 7      | -0.317    | 0.103           |
| 1850 | Diethylstilbestrol                   | Prestwick | 10       | D   | 7      | 0.023     | -0.249          |
| 1851 | Tindazole                            | Prestwick | 10       | E   | 7      | -0.448    | -0.107          |
| 1852 | Guafenesin                           | Prestwick | 10       | F   | 7      | -0.282    | 0.099           |
| 1853 | Methimazole                          | Prestwick | 10       | G   | 7      | -0.479    | -0.389          |
| 1854 | Lithocholic acid                     | Prestwick | 10       | H   | 7      | -0.211    | -1.003          |
| 1855 | Liranafate                           | Prestwick | 10       | A   | 8      | -0.958    | 0.173           |
| 1856 | Atractyloside potassium salt         | Prestwick | 10       | B   | 8      | -0.22     | 0.17            |
| 1857 | Cefanandole sodium salt              | Prestwick | 10       | C   | 8      | 0.284     | 0.283           |
| 1858 | Chlorotrianisene                     | Prestwick | 10       | D   | 8      | -0.041    | -0.077          |
| 1859 | Guanadrel sulfate                    | Prestwick | 10       | E   | 8      | -0.599    | 0.116           |
| 1860 | Alexidine dihydrochloride            | Prestwick | 10       | F   | 8      | 2.243     | -5.013          |
| 1861 | Merbromin                            | Prestwick | 10       | G   | 8      | -3.974    | 0.448           |
| 1862 | Methotrimprazine maleat salt         | Prestwick | 10       | H   | 8      | -1.007    | 0.883           |
| 1863 | Sulfadimethoxine                     | Prestwick | 10       | A   | 9      | -0.859    | 0.824           |
| 1864 | Folinic acid calcium salt            | Prestwick | 10       | B   | 9      | -0.789    | 0.472           |
| 1865 | Monensin sodium salt                 | Prestwick | 10       | C   | 9      | 2.112     | -4.792          |
| 1866 | Ribostamycin sulfate salt            | Prestwick | 10       | D   | 9      | -0.121    | 0.194           |
| 1867 | Vidarabine                           | Prestwick | 10       | E   | 9      | -0.34     | 0.457           |
| 1868 | Proadifen hydrochloride              | Prestwick | 10       | F   | 9      | -0.957    | 0.683           |
| 1869 | Hexylcaine hydrochloride             | Prestwick | 10       | G   | 9      | -0.074    | 0.235           |
| 1870 | Dienestrol                           | Prestwick | 10       | H   | 9      | -0.778    | 0.487           |
| 1871 | Sulfanilamide                        | Prestwick | 10       | A   | 10     | -0.634    | -0.388          |
| 1872 | Levonordefrin                        | Prestwick | 10       | B   | 10     | 0.139     | -0.192          |
| 1873 | Isoetharine mesylate salt            | Prestwick | 10       | C   | 10     | 0.288     | 0.075           |
| 1874 | Methacholine chloride                | Prestwick | 10       | D   | 10     | 0.184     | -0.104          |
| 1875 | Sulfamer                             | Prestwick | 10       | E   | 10     | -0.598    | -0.108          |
| 1876 | Zomepirac sodium salt                | Prestwick | 10       | F   | 10     | -0.459    | 0.117           |
| 1877 | Drofenine hydrochloride              | Prestwick | 10       | G   | 10     | -0.072    | 0.117           |
| 1878 | Pridinol methanesulfonate salt       | Prestwick | 10       | H   | 10     | -1.152    | 1.115           |
| 1879 | Balsalazide Sodium                   | Prestwick | 10       | A   | 11     | -0.838    | -0.119          |
| 1880 | Ebselen                              | Prestwick | 10       | B   | 11     | 0.267     | 0.009           |
| 1881 | Mevalonic-D, L acid lactone          | Prestwick | 10       | C   | 11     | -0.121    | 0.443           |
| 1882 | Piperzolate bromide                  | Prestwick | 10       | D   | 11     | 0.422     | -0.656          |
| 1883 | Isopropanamide iodide                | Prestwick | 10       | E   | 11     | -0.456    | -0.123          |
| 1884 | Cinoxacin                            | Prestwick | 10       | F   | 11     | -0.408    | -0.253          |
| 1885 | Cycloheximide                        | Prestwick | 10       | G   | 11     | 1.739     | -3.351          |
| 1886 | Amrnone                              | Prestwick | 10       | H   | 11     | -0.055    | 0.042           |
| 1887 | Carbinoxamine maleate salt           | Prestwick | 11       | A   | 2      | -1.288    | 0.327           |
| 1888 | Auranofin                            | Prestwick | 11       | B   | 2      | 1.258     | -2.75           |
| 1889 | Azlocillin sodium salt               | Prestwick | 11       | C   | 2      | -0.667    | 0.557           |
| 1890 | Butacaine                            | Prestwick | 11       | D   | 2      | -0.585    | 0.223           |
| 1891 | Olanzapine                           | Prestwick | 11       | E   | 2      | 0.243     | 0.576           |
| 1892 | Paroxetine Hydrochloride             | Prestwick | 11       | F   | 2      | 1.138     | -0.039          |
| 1893 | Gabapentin                           | Prestwick | 11       | G   | 2      | -0.073    | 0.576           |
| 1894 | Iopamidol                            | Prestwick | 11       | H   | 2      | -0.807    | 0.661           |
| 1895 | Methazolamide                        | Prestwick | 11       | A   | 3      | -0.638    | 0.044           |
| 1896 | Cromolyn disodium salt               | Prestwick | 11       | B   | 3      | -0.663    | 0.067           |
| 1897 | Clidinium bromide                    | Prestwick | 11       | C   | 3      | 0.304     | 0.095           |
| 1898 | Cefoxitin sodium salt                | Prestwick | 11       | D   | 3      | -0.429    | 0.774           |
| 1899 | Trimeprazine Tartrate                | Prestwick | 11       | E   | 3      | 0.39      | -0.048          |
| 1900 | Nylidrin                             | Prestwick | 11       | F   | 3      | -0.015    | 0.044           |
| 1901 | Raloxifene hydrochloride             | Prestwick | 11       | G   | 3      | -0.134    | 0.36            |
| 1902 | Iopromide                            | Prestwick | 11       | H   | 3      | -1.285    | 1.181           |
| 1903 | Pyrimethidione                       | Prestwick | 11       | A   | 4      | -0.847    | -0.598          |
| 1904 | Bucladesine sodium salt              | Prestwick | 11       | B   | 4      | -0.426    | -0.376          |
| 1905 | Sulfamonomethoxine                   | Prestwick | 11       | C   | 4      | -0.152    | -0.142          |
| 1906 | Ifosfamide                           | Prestwick | 11       | D   | 4      | 0.259     | -0.044          |
| 1907 | Nafcillin sodium salt monohydrate    | Prestwick | 11       | E   | 4      | -0.203    | -0.295          |
| 1908 | Liothyronine                         | Prestwick | 11       | F   | 4      | 0.507     | -0.2            |
| 1909 | Etidronic acid, disodium salt        | Prestwick | 11       | G   | 4      | -0.29     | 0.291           |
| 1910 | Theophylline monohydrate             | Prestwick | 11       | H   | 4      | -1.3      | 0.384           |
| 1911 | Spectinomycin dihydrochloride        | Prestwick | 11       | A   | 5      | -0.797    | -0.372          |
| 1912 | Cefsulodin sodium salt               | Prestwick | 11       | B   | 5      | 0.304     | 0.041           |
| 1913 | Benzthiazide                         | Prestwick | 11       | C   | 5      | 0.037     | 0.464           |
| 1914 | Novobiocin sodium salt               | Prestwick | 11       | D   | 5      | 0.008     | 0.003           |
| 1915 | Procyclidine hydrochloride           | Prestwick | 11       | E   | 5      | 1.093     | 0.029           |
| 1916 | Roxithromycin                        | Prestwick | 11       | F   | 5      | 0.497     | 0.178           |
| 1917 | Methylhydantoin-5-(D)                | Prestwick | 11       | G   | 5      | 0.395     | -0.062          |
| 1918 | Theobromine                          | Prestwick | 11       | H   | 5      | -0.941    | 0.132           |
| 1919 | Piromidic acid                       | Prestwick | 11       | A   | 6      | -0.165    | 0.486           |
| 1920 | Fosfosal                             | Prestwick | 11       | B   | 6      | 0.629     | 0.389           |
| 1921 | Trichlormethiazide                   | Prestwick | 11       | C   | 6      | -0.476    | 1.218           |
| 1922 | Tetrahydroxy-1,4-quinone monohydrate | Prestwick | 11       | D   | 6      | -0.714    | 0.983           |
| 1923 | Amprilose hydrochloride              | Prestwick | 11       | E   | 6      | 0.469     | 0.379           |
| 1924 | Beclomethasone dipropionate          | Prestwick | 11       | F   | 6      | -0.447    | 1.021           |
| 1925 | Simvastatin                          | Prestwick | 11       | G   | 6      | 2.081     | -4.681          |
| 1926 | Reserpine                            | Prestwick | 11       | H   | 6      | -0.532    | 0.466           |
| 1927 | Trimeprazine maleate salt            | Prestwick | 11       | A   | 7      | -1.804    | 0.854           |
| 1928 | Suprofen                             | Prestwick | 11       | B   | 7      | -0.211    | 1.032           |
| 1929 | Oxalamine citrate salt               | Prestwick | 11       | C   | 7      | -0.147    | 1.263           |
| 1930 | Indoprofen                           | Prestwick | 11       | D   | 7      | -0.574    | 1.114           |
| 1931 | Ethinylestradiol 3-methyl ether      | Prestwick | 11       | E   | 7      | -0.113    | 0.96            |
| 1932 | Tolmetin sodium salt dihydrate       | Prestwick | 11       | F   | 7      | -0.196    | 0.589           |
| 1933 | Azacytidine-5                        | Prestwick | 11       | G   | 7      | -0.058    | -0.187          |
| 1934 | Bicalutamide                         | Prestwick | 11       | H   | 7      | -1.109    | 0.945           |
| 1935 | Chloropyramine hydrochloride         | Prestwick | 11       | A   | 8      | -0.699    | -0.23           |
| 1936 | Catechin-(+,-) hydrate               | Prestwick | 11       | B   | 8      | 0.579     | -0.301          |
| 1937 | Propantheline bromide                | Prestwick | 11       | C   | 8      | -0.231    | -0.185          |
| 1938 | Carbenoxolone disodium salt          | Prestwick | 11       | D   | 8      | 0.173     | 0.419           |
| 1939 | (-)-Levobunolol hydrochloride        | Prestwick | 11       | E   | 8      | 0.608     | 0.12            |
| 1940 | (+)-Levobunolol hydrochloride        | Prestwick | 11       | F   | 8      | -0.245    | 0.123           |
| 1941 | Paromomycin sulfate                  | Prestwick | 11       | G   | 8      | -0.24     | 0.02            |
| 1942 | Scopolamine hydrochloride            | Prestwick | 11       | H   | 8      | -0.387    | 0.797           |
| 1943 | Furazolidone                         | Prestwick | 11       | A   | 9      | -0.571    | -0.556          |
| 1944 | Nadolol                              | Prestwick | 11       | B   | 9      | -0.386    | -0.389          |



SUPPLEMENTARY DATA

|      | Name                                  | Library   | Plate No | Row | Column | ROS score | viability score |
|------|---------------------------------------|-----------|----------|-----|--------|-----------|-----------------|
| 1945 | Viloxazine hydrochloride              | PreStwick | 11       | C   | 8      | 0.217     | 0.541           |
| 1946 | Iocetamic acid                        | PreStwick | 11       | D   | 9      | -0.038    | 0.003           |
| 1947 | Iodixanol                             | PreStwick | 11       | E   | 9      | -0.05     | -0.188          |
| 1948 | Doxazosin mesylate                    | PreStwick | 11       | F   | 9      | 0.497     | -0.31           |
| 1949 | Acetaminophen                         | PreStwick | 11       | G   | 9      | 0.029     | 0.194           |
| 1950 | Ioversol                              | PreStwick | 11       | H   | 9      | -0.6      | 0.371           |
| 1951 | Dichlorphenamide                      | PreStwick | 11       | A   | 10     | -0.327    | -0.358          |
| 1952 | Moxalactam disodium salt              | PreStwick | 11       | B   | 10     | -0.056    | -0.482          |
| 1953 | Dimethadione                          | PreStwick | 11       | C   | 10     | 0.03      | -0.28           |
| 1954 | Ganciclovir                           | PreStwick | 11       | D   | 10     | 0.178     | -0.182          |
| 1955 | Rofitetracycline                      | PreStwick | 11       | E   | 10     | -0.282    | -0.381          |
| 1956 | Fluvastatin sodium salt               | PreStwick | 11       | F   | 10     | 2.157     | -1.98           |
| 1957 | Phthalylsulfathiazole                 | PreStwick | 11       | G   | 10     | -0.495    | 0.083           |
| 1958 | Rabeprazole                           | PreStwick | 11       | H   | 10     | -1.082    | -0.317          |
| 1959 | Sulconazole nitrate                   | PreStwick | 11       | A   | 11     | 0.189     | -0.342          |
| 1960 | Aminophylline                         | PreStwick | 11       | B   | 11     | 0.577     | -0.538          |
| 1961 | Ethaverine hydrochloride              | PreStwick | 11       | C   | 11     | 0.624     | -2.105          |
| 1962 | Ethopropazine hydrochloride           | PreStwick | 11       | D   | 11     | -0.083    | -0.188          |
| 1963 | Equilin                               | PreStwick | 11       | E   | 11     | 0.183     | -0.378          |
| 1964 | Methylhydantoin-5-(L)                 | PreStwick | 11       | F   | 11     | -0.081    | 0.441           |
| 1965 | Luteolin                              | PreStwick | 11       | G   | 11     | -0.848    | 0.811           |
| 1966 | Carbachol                             | PreStwick | 11       | H   | 11     | -0.488    | -0.28           |
| 1967 | Niacin                                | PreStwick | 12       | A   | 2      | -1.395    | 0.023           |
| 1968 | Cortisol acetate                      | PreStwick | 12       | B   | 2      | -0.398    | 0.588           |
| 1969 | Hymecromone                           | PreStwick | 12       | C   | 2      | -0.29     | 0.354           |
| 1970 | (+)-Isoproterenol (+)-bitartrate salt | PreStwick | 12       | D   | 2      | -0.152    | 0.38            |
| 1971 | Nizatidine                            | PreStwick | 12       | E   | 2      | 0.032     | 0.685           |
| 1972 | Propofol                              | PreStwick | 12       | F   | 2      | 0.012     | 0.4             |
| 1973 | Pentetic acid                         | PreStwick | 12       | G   | 2      | -0.256    | 0.427           |
| 1974 | Crotamiton                            | PreStwick | 12       | H   | 2      | -0.998    | -1.349          |
| 1975 | Bemegride                             | PreStwick | 12       | A   | 3      | -0.33     | 0.43            |
| 1976 | Flubendazol                           | PreStwick | 12       | B   | 3      | 0.363     | -2.31           |
| 1977 | Caffeic acid                          | PreStwick | 12       | C   | 3      | 0.115     | 0.595           |
| 1978 | Monobenzene                           | PreStwick | 12       | D   | 3      | 0.413     | -0.179          |
| 1979 | Thiopamide maleate                    | PreStwick | 12       | E   | 3      | 0.225     | 0.485           |
| 1980 | S(-)Eticlopride hydrochloride         | PreStwick | 12       | F   | 3      | 0.282     | -0.09           |
| 1981 | Bretium tosylate                      | PreStwick | 12       | G   | 3      | -0.459    | 0.241           |
| 1982 | Toremifene                            | PreStwick | 12       | H   | 3      | -1.747    | 5.774           |
| 1983 | Digoxigenin                           | PreStwick | 12       | A   | 4      | -1.214    | -0.274          |
| 1984 | Felbinac                              | PreStwick | 12       | B   | 4      | 0.054     | -0.314          |
| 1985 | Diloxanide furoate                    | PreStwick | 12       | C   | 4      | 0.987     | -0.78           |
| 1986 | 2-Aminobenzenesulfonamide             | PreStwick | 12       | D   | 4      | 0.419     | 0.537           |
| 1987 | Xamoterol hemifumarate                | PreStwick | 12       | E   | 4      | 0.516     | -0.042          |
| 1988 | Primidone                             | PreStwick | 12       | F   | 4      | 0.082     | -0.403          |
| 1989 | Pralidoxime chloride                  | PreStwick | 12       | G   | 4      | 0.099     | 0.399           |
| 1990 | (R)-(+)-Atenolol                      | PreStwick | 12       | H   | 4      | -0.705    | -0.005          |
| 1991 | Meglumine                             | PreStwick | 12       | A   | 5      | -0.607    | 0.059           |
| 1992 | Butylparaben                          | PreStwick | 12       | B   | 5      | 0.805     | -0.301          |
| 1993 | Metyrapone                            | PreStwick | 12       | C   | 5      | 0.491     | -0.719          |
| 1994 | Estrone                               | PreStwick | 12       | D   | 5      | 0.814     | 0.012           |
| 1995 | Rolipram                              | PreStwick | 12       | E   | 5      | -0.172    | 0.199           |
| 1996 | Flucytosine                           | PreStwick | 12       | F   | 5      | 0.255     | 0.199           |
| 1997 | Phenoxybenzamine hydrochloride        | PreStwick | 12       | G   | 5      | 0.141     | 0.339           |
| 1998 | Tyloxapol                             | PreStwick | 12       | H   | 5      | -0.542    | 0.055           |
| 1999 | Cantharidin                           | PreStwick | 12       | A   | 6      | -0.14     | -3.298          |
| 2000 | Aminohippuric acid                    | PreStwick | 12       | B   | 6      | 0.292     | -0.653          |
| 2001 | Urapidil hydrochloride                | PreStwick | 12       | C   | 6      | 0.086     | -0.4            |
| 2002 | Lorglumide sodium salt                | PreStwick | 12       | D   | 6      | -0.21     | -0.038          |
| 2003 | Thorzonium bromide                    | PreStwick | 12       | E   | 6      | 1.05      | -1.951          |
| 2004 | (-)-MK 801 hydrogen maleate           | PreStwick | 12       | F   | 6      | 0.429     | -0.248          |
| 2005 | Salmeterol                            | PreStwick | 12       | G   | 6      | -0.061    | 0.387           |
| 2006 | Florfenicol                           | PreStwick | 12       | H   | 6      | -0.494    | -1.777          |
| 2007 | Clioquinol                            | PreStwick | 12       | A   | 7      | -0.237    | -0.898          |
| 2008 | N-Acetyl-L-leucine                    | PreStwick | 12       | B   | 7      | 0.835     | -0.558          |
| 2009 | Fluspirilen                           | PreStwick | 12       | C   | 7      | 0.806     | -1.709          |
| 2010 | Nitrendipine                          | PreStwick | 12       | D   | 7      | -0.012    | -0.535          |
| 2011 | Idazoxan hydrochloride                | PreStwick | 12       | E   | 7      | -0.551    | 0.073           |
| 2012 | Bephenium hydroxynaphthoate           | PreStwick | 12       | F   | 7      | -0.422    | -0.393          |
| 2013 | Altretamine                           | PreStwick | 12       | G   | 7      | -0.388    | -0.125          |
| 2014 | Megestrol acetate                     | PreStwick | 12       | H   | 7      | 0.071     | -0.934          |
| 2015 | Oxybenzone                            | PreStwick | 12       | A   | 8      | -0.887    | -0.721          |
| 2016 | Pipemidic acid                        | PreStwick | 12       | B   | 8      | 0.007     | -0.508          |
| 2017 | S(+)-Ibuprofen                        | PreStwick | 12       | C   | 8      | 0.304     | -0.427          |
| 2018 | Flurbiprofen                          | PreStwick | 12       | D   | 8      | 0.258     | 0.189           |
| 2019 | Quinapril HCl                         | PreStwick | 12       | E   | 8      | 0.527     | 0.853           |
| 2020 | Dehydroisoandrosterone 3-acetate      | PreStwick | 12       | F   | 8      | -0.216    | 0.238           |
| 2021 | Prazosin hydrochloride                | PreStwick | 12       | G   | 8      | -0.207    | 0.787           |
| 2022 | Deoxycorticosterone                   | PreStwick | 12       | H   | 8      | -1.187    | -0.575          |
| 2023 | Promethazine hydrochloride            | PreStwick | 12       | A   | 9      | -0.85     | 0.583           |
| 2024 | Dioxybenzone                          | PreStwick | 12       | B   | 9      | -0.317    | -0.31           |
| 2025 | Ethinodiol diacetate                  | PreStwick | 12       | C   | 9      | -0.119    | -0.064          |
| 2026 | Nimodipine                            | PreStwick | 12       | D   | 9      | -0.198    | 0.895           |
| 2027 | Nilutamide                            | PreStwick | 12       | E   | 9      | 0.046     | 0.85            |
| 2028 | Benserazide hydrochloride             | PreStwick | 12       | F   | 9      | 0.178     | 0.555           |
| 2029 | Timolol maleate salt                  | PreStwick | 12       | G   | 9      | -0.663    | 1.348           |
| 2030 | Urosiol                               | PreStwick | 12       | H   | 9      | -0.571    | 0.269           |
| 2031 | Diaerein                              | PreStwick | 12       | A   | 10     | -0.894    | -0.082          |
| 2032 | Adrenosterone                         | PreStwick | 12       | B   | 10     | -0.83     | -0.34           |
| 2033 | Nabumetone                            | PreStwick | 12       | C   | 10     | -0.136    | -0.033          |
| 2034 | Bacitracin                            | PreStwick | 12       | D   | 10     | 0.218     | 0.157           |
| 2035 | Ketorolac tromethamine                | PreStwick | 12       | E   | 10     | -0.305    | -0.082          |
| 2036 | Iodipamide                            | PreStwick | 12       | F   | 10     | -0.079    | 0.311           |
| 2037 | (+,-)-Octopamine hydrochloride        | PreStwick | 12       | G   | 10     | -0.475    | 0.243           |
| 2038 | Proparacaine hydrochloride            | PreStwick | 12       | H   | 10     | -1.006    | 0.003           |
| 2039 | Esmolol hydrochloride                 | PreStwick | 12       | A   | 11     | -0.507    | -0.334          |
| 2040 | Methylatropine nitrate                | PreStwick | 12       | B   | 11     | 0.248     | 0.038           |
| 2041 | Nisoxetine hydrochloride              | PreStwick | 12       | C   | 11     | 0.529     | 0.477           |
| 2042 | L(-)-vesamicol hydrochloride          | PreStwick | 12       | D   | 11     | 0.274     | 0.882           |
| 2043 | Protriptyline hydrochloride           | PreStwick | 12       | E   | 11     | 0.129     | 0.588           |
| 2044 | Allopurinol                           | PreStwick | 12       | F   | 11     | -0.281    | 1.222           |
| 2045 | Stavudine                             | PreStwick | 12       | G   | 11     | -0.321    | 0.571           |
| 2046 | Aminocaproic acid                     | PreStwick | 12       | H   | 11     | -1.157    | 0.514           |
| 2047 | Denatonium benzoate                   | PreStwick | 13       | A   | 2      | -0.679    | 0.182           |
| 2048 | Remoxipride Hydrochloride             | PreStwick | 13       | B   | 2      | -0.673    | 0.98            |
| 2049 | Nitrocaramiphen hydrochloride         | PreStwick | 13       | C   | 2      | -0.301    | 0.854           |

SUPPLEMENTARY DATA

|      | Name                          | Library   | Plate No | Row | Column | ROS score | viability score |
|------|-------------------------------|-----------|----------|-----|--------|-----------|-----------------|
| 2050 | Gliquidone                    | PreStwick | 13       | D   | 2      | 0.039     | 1.903           |
| 2051 | Alfadolone acetate            | PreStwick | 13       | E   | 2      | -0.352    | 1.165           |
| 2052 | Flucloxacillin sodium         | PreStwick | 13       | F   | 2      | -0.428    | 1.119           |
| 2053 | Isradipine                    | PreStwick | 13       | G   | 2      | -0.181    | 0.621           |
| 2054 | Halofantrine hydrochloride    | PreStwick | 13       | H   | 2      | 0.128     | -1.434          |
| 2055 | Canrenone                     | PreStwick | 13       | A   | 3      | -0.464    | -0.201          |
| 2056 | THIP hydrochloride            | PreStwick | 13       | B   | 3      | -0.408    | -0.019          |
| 2057 | Nandrolone                    | PreStwick | 13       | C   | 3      | 0.119     | 0.411           |
| 2058 | Pizotifen malate              | PreStwick | 13       | D   | 3      | 0.817     | 1.139           |
| 2059 | Alfaxalone                    | PreStwick | 13       | E   | 3      | -0.008    | 0.838           |
| 2060 | Trapidil                      | PreStwick | 13       | F   | 3      | 0.254     | 0.397           |
| 2061 | Tiletamine hydrochloride      | PreStwick | 13       | G   | 3      | -0.064    | 0.854           |
| 2062 | Articaine hydrochloride       | PreStwick | 13       | H   | 3      | -0.278    | 1.029           |
| 2063 | Enilconazole                  | PreStwick | 13       | A   | 4      | -0.475    | 0.088           |
| 2064 | Pirindole mesylate            | PreStwick | 13       | B   | 4      | -0.215    | 0.209           |
| 2065 | Dimaprit dihydrochloride      | PreStwick | 13       | C   | 4      | 0.318     | 0.767           |
| 2066 | Ribavirin                     | PreStwick | 13       | D   | 4      | -0.148    | 0.481           |
| 2067 | Azapropazone                  | PreStwick | 13       | E   | 4      | 0.503     | 0.517           |
| 2068 | Deptropine citrate            | PreStwick | 13       | F   | 4      | -0.131    | 0.143           |
| 2069 | Isometheptene mucate          | PreStwick | 13       | G   | 4      | 0.087     | 0.691           |
| 2070 | Nomesgestrol acetate          | PreStwick | 13       | H   | 4      | -0.322    | 0.511           |
| 2071 | Methacurline hydrochloride    | PreStwick | 13       | A   | 5      | -0.384    | 0.374           |
| 2072 | Pronethalol hydrochloride     | PreStwick | 13       | B   | 5      | -0.138    | 0.493           |
| 2073 | Oxendazol                     | PreStwick | 13       | C   | 5      | -0.045    | 0.534           |
| 2074 | Cyclopentiazide               | PreStwick | 13       | D   | 5      | 0.815     | 0.409           |
| 2075 | Meptazinol hydrochloride      | PreStwick | 13       | E   | 5      | 0.024     | 0.419           |
| 2076 | Setralime                     | PreStwick | 13       | F   | 5      | -0.059    | 0.527           |
| 2077 | Nifurtimox                    | PreStwick | 13       | G   | 5      | 0.02      | 1.211           |
| 2078 | Pancuronium bromide           | PreStwick | 13       | H   | 5      | -0.578    | 0.66            |
| 2079 | Flouxuridine                  | PreStwick | 13       | A   | 6      | 0.838     | -1.545          |
| 2080 | Naftopidil dihydrochloride    | PreStwick | 13       | B   | 6      | 0.255     | 0.054           |
| 2081 | Guaiacol                      | PreStwick | 13       | C   | 6      | -0.102    | 0.219           |
| 2082 | Fluvoxamine maleate           | PreStwick | 13       | D   | 6      | -0.359    | 0.188           |
| 2083 | Apramycin                     | PreStwick | 13       | E   | 6      | 0.181     | 0.074           |
| 2084 | Ethamsylate                   | PreStwick | 13       | F   | 6      | 0.243     | -0.047          |
| 2085 | Letrozole                     | PreStwick | 13       | G   | 6      | -0.064    | 0.081           |
| 2086 | Molindone hydrochloride       | PreStwick | 13       | H   | 6      | -1.207    | -0.405          |
| 2087 | Sotalol hydrochloride         | PreStwick | 13       | A   | 7      | 0.114     | -0.123          |
| 2088 | Tracazolate hydrochloride     | PreStwick | 13       | B   | 7      | 0.67      | -0.047          |
| 2089 | Proscillaridin A              | PreStwick | 13       | C   | 7      | 0.291     | -0.359          |
| 2090 | Prothionamide                 | PreStwick | 13       | D   | 7      | 0.314     | -0.288          |
| 2091 | Epitostanol                   | PreStwick | 13       | E   | 7      | 0.423     | -0.538          |
| 2092 | Moxonidine                    | PreStwick | 13       | F   | 7      | 0.717     | -0.308          |
| 2093 | Arbutin                       | PreStwick | 13       | G   | 7      | 0.282     | 0.088           |
| 2094 | Alcuronium chloride           | PreStwick | 13       | H   | 7      | -0.248    | -0.101          |
| 2095 | Gestrinone                    | PreStwick | 13       | A   | 8      | -0.238    | -0.355          |
| 2096 | Zardaverine                   | PreStwick | 13       | B   | 8      | -0.239    | 0.844           |
| 2097 | Prampexole                    | PreStwick | 13       | C   | 8      | 0.413     | -0.558          |
| 2098 | Fluticasone propionate        | PreStwick | 13       | D   | 8      | 0.81      | 0.088           |
| 2099 | Fursultiamine Hydrochloride   | PreStwick | 13       | E   | 8      | -0.005    | -0.04           |
| 2100 | Edifenine hydrochloride       | PreStwick | 13       | F   | 8      | 0.125     | -0.258          |
| 2101 | Tocainide hydrochloride       | PreStwick | 13       | G   | 8      | -0.42     | 0.287           |
| 2102 | Zalcitabine                   | PreStwick | 13       | H   | 8      | -0.626    | -0.174          |
| 2103 | Decamethonium bromide         | PreStwick | 13       | A   | 9      | -0.485    | -0.291          |
| 2104 | Memantine Hydrochloride       | PreStwick | 13       | B   | 9      | -0.315    | -0.638          |
| 2105 | Norgestimate                  | PreStwick | 13       | C   | 9      | 0.186     | -1.168          |
| 2106 | Zuclopenthixol hydrochloride  | PreStwick | 13       | D   | 9      | 0.374     | -0.027          |
| 2107 | Gabexate mesilate             | PreStwick | 13       | E   | 9      | -0.477    | 0.281           |
| 2108 | Alprostadil                   | PreStwick | 13       | F   | 9      | 0.45      | 0.274           |
| 2109 | Benzathine benzylpenicillin   | PreStwick | 13       | G   | 9      | -0.145    | 0.541           |
| 2110 | Methyldopate hydrochloride    | PreStwick | 13       | H   | 9      | -0.675    | -0.172          |
| 2111 | 3-Acetamidoooumarin           | PreStwick | 13       | A   | 10     | -0.281    | -0.778          |
| 2112 | Ozagrel hydrochloride         | PreStwick | 13       | B   | 10     | -0.337    | -0.679          |
| 2113 | Chlormadinone acetate         | PreStwick | 13       | C   | 10     | 0.513     | -0.198          |
| 2114 | Proguanil hydrochloride       | PreStwick | 13       | D   | 10     | 1.907     | -5.428          |
| 2115 | Pivampicillin                 | PreStwick | 13       | E   | 10     | -0.566    | 0.173           |
| 2116 | Tribenoside                   | PreStwick | 13       | F   | 10     | -0.314    | 0.005           |
| 2117 | Risperidone                   | PreStwick | 13       | G   | 10     | -0.438    | 0.683           |
| 2118 | Levocabastine hydrochloride   | PreStwick | 13       | H   | 10     | -0.358    | 0.343           |
| 2119 | Roxarsone                     | PreStwick | 13       | A   | 11     | 0.513     | -0.916          |
| 2120 | Pinbedil hydrochloride        | PreStwick | 13       | B   | 11     | 0.247     | -0.672          |
| 2121 | Phenylbutazone                | PreStwick | 13       | C   | 11     | -0.168    | -0.898          |
| 2122 | Lymecycline                   | PreStwick | 13       | D   | 11     | -0.444    | -0.039          |
| 2123 | Talampicillin hydrochloride   | PreStwick | 13       | E   | 11     | -0.08     | -0.123          |
| 2124 | Rumexolone                    | PreStwick | 13       | F   | 11     | -0.095    | 0.293           |
| 2125 | Torseamide                    | PreStwick | 13       | G   | 11     | -0.701    | 0.055           |
| 2126 | Pyrvinium pamoate             | PreStwick | 13       | H   | 11     | -7.289    | -4.402          |
| 2127 | Etomidate                     | PreStwick | 14       | A   | 2      | -0.851    | -0.39           |
| 2128 | Moricizine hydrochloride      | PreStwick | 14       | B   | 2      | 0.077     | 0.429           |
| 2129 | Phensuximide                  | PreStwick | 14       | C   | 2      | 0.571     | 0.58            |
| 2130 | Imidurea                      | PreStwick | 14       | D   | 2      | -0.888    | 0.472           |
| 2131 | (S)-propranolol hydrochloride | PreStwick | 14       | E   | 2      | -0.176    | 0.272           |
| 2132 | Spaglumic acid                | PreStwick | 14       | F   | 2      | 0.092     | 0.399           |
| 2133 | Penindopril                   | PreStwick | 14       | G   | 2      | -0.532    | 0.197           |
| 2134 | Mecamylamine hydrochloride    | PreStwick | 14       | H   | 2      | -0.507    | 0.032           |
| 2135 | Indihexethyl chloride         | PreStwick | 14       | A   | 3      | 0.358     | -0.514          |
| 2136 | Iopanoic acid                 | PreStwick | 14       | B   | 3      | 0.33      | -0.227          |
| 2137 | Ioxaglic acid                 | PreStwick | 14       | C   | 3      | 0.437     | 0.038           |
| 2138 | Lansoprazole                  | PreStwick | 14       | D   | 3      | 0.317     | 0.058           |
| 2139 | (-)-Eseroline fumarate salt   | PreStwick | 14       | E   | 3      | 0.214     | -0.073          |
| 2140 | Ranolazine                    | PreStwick | 14       | F   | 3      | 0.571     | -0.15           |
| 2141 | Fexofenadine HCl              | PreStwick | 14       | G   | 3      | -0.203    | -0.223          |
| 2142 | Procabazine hydrochloride     | PreStwick | 14       | H   | 3      | -0.482    | -0.288          |
| 2143 | Penbutolol sulfate            | PreStwick | 14       | A   | 4      | -1.234    | -0.533          |
| 2144 | Pivmecillinam hydrochloride   | PreStwick | 14       | B   | 4      | -0.09     | -0.088          |
| 2145 | Nafufine hydrochloride        | PreStwick | 14       | C   | 4      | 0.254     | 0.348           |
| 2146 | Bethanechol chloride          | PreStwick | 14       | D   | 4      | 0.054     | 0.311           |
| 2147 | Isosorbide mononitrate        | PreStwick | 14       | E   | 4      | 0.583     | -0.193          |
| 2148 | Misoprostol                   | PreStwick | 14       | F   | 4      | 0.172     | -0.47           |
| 2149 | 4-aminosalicylic acid         | PreStwick | 14       | G   | 4      | -0.204    | -0.127          |
| 2150 | Viomycin sulfate              | PreStwick | 14       | H   | 4      | -0.702    | 0.24            |
| 2151 | Prednicarbate                 | PreStwick | 14       | A   | 5      | 0.246     | -1.1            |
| 2152 | Levopropoxyphene napsylate    | PreStwick | 14       | B   | 5      | 0.023     | -0.555          |
| 2153 | Mepylcaine hydrochloride      | PreStwick | 14       | C   | 5      | 0.159     | -0.794          |
| 2154 | Cyproterone acetate           | PreStwick | 14       | D   | 5      | 0.83      | -0.187          |



SUPPLEMENTARY DATA

|      | Name                            | Library   | Plate No | Row | Column | ROS score | viability score |
|------|---------------------------------|-----------|----------|-----|--------|-----------|-----------------|
| 2155 | Leucomisine                     | Prestwick | 14       | E   | 5      | 0.209     | -0.045          |
| 2156 | Sulfadoxine                     | Prestwick | 14       | F   | 5      | 0.213     | -0.458          |
| 2157 | Clonixin Lysinate               | Prestwick | 14       | G   | 5      | -0.124    | -0.823          |
| 2158 | Saguinavir mesylate             | Prestwick | 14       | H   | 5      | 0.311     | -0.052          |
| 2159 | Sertaconazole nitrate           | Prestwick | 14       | A   | 6      | -0.197    | -0.888          |
| 2160 | Piperidolate hydrochloride      | Prestwick | 14       | B   | 6      | -0.093    | -0.146          |
| 2161 | Milrinone                       | Prestwick | 14       | C   | 6      | 0.576     | 0.097           |
| 2162 | (R)-Propranolol hydrochloride   | Prestwick | 14       | D   | 6      | 0.114     | 0.776           |
| 2163 | Topiramate                      | Prestwick | 14       | E   | 6      | -0.049    | 0.078           |
| 2164 | Cyclopentolate hydrochloride    | Prestwick | 14       | F   | 6      | 0.894     | -0.058          |
| 2165 | Verteporfin                     | Prestwick | 14       | G   | 6      | -3.118    | 7.908           |
| 2166 | Ronidazole                      | Prestwick | 14       | H   | 6      | -1.016    | 0.174           |
| 2167 | Repaglinide                     | Prestwick | 14       | A   | 7      | -0.2      | -1.050          |
| 2168 | Trifluridine                    | Prestwick | 14       | B   | 7      | 0.582     | -0.703          |
| 2169 | Methanetheline bromide          | Prestwick | 14       | C   | 7      | -0.115    | 0.275           |
| 2170 | Ciprofibrate                    | Prestwick | 14       | D   | 7      | 0.029     | -0.273          |
| 2171 | D-cycloserine                   | Prestwick | 14       | E   | 7      | 0.178     | -0.043          |
| 2172 | Estriol                         | Prestwick | 14       | F   | 7      | -0.224    | -0.031          |
| 2173 | Meropenem                       | Prestwick | 14       | G   | 7      | 0.11      | 0.13            |
| 2174 | Dorzolamide hydrochloride       | Prestwick | 14       | H   | 7      | -1.287    | 0.32            |
| 2175 | Piretanide                      | Prestwick | 14       | A   | 8      | -0.286    | 0.102           |
| 2176 | Oxprenolol hydrochloride        | Prestwick | 14       | B   | 8      | -0.012    | 0.216           |
| 2177 | Ticarcillin sodium              | Prestwick | 14       | C   | 8      | 0.284     | 0.83            |
| 2178 | Formestane                      | Prestwick | 14       | D   | 8      | 0.192     | 0.508           |
| 2179 | 2-Chloropyrazine                | Prestwick | 14       | E   | 8      | 0.583     | 0.845           |
| 2180 | (-)-Isoproterenol hydrochloride | Prestwick | 14       | F   | 8      | 0.24      | 0.656           |
| 2181 | Ramipril                        | Prestwick | 14       | G   | 8      | -0.116    | 0.19            |
| 2182 | Azaperone                       | Prestwick | 14       | H   | 8      | -1.085    | 0.121           |
| 2183 | Piperacetazine                  | Prestwick | 14       | A   | 9      | -0.555    | -0.485          |
| 2184 | Ondansetron Hydrochloride       | Prestwick | 14       | B   | 9      | -0.422    | -0.287          |
| 2185 | Thiethylperazine malate         | Prestwick | 14       | C   | 9      | 0.03      | 0.304           |
| 2186 | Benzylpenicillin sodium         | Prestwick | 14       | D   | 9      | 0.283     | 0.378           |
| 2187 | (+)-Synephrine                  | Prestwick | 14       | E   | 9      | -0.327    | -0.025          |
| 2188 | Sarafloxacin                    | Prestwick | 14       | F   | 9      | 0.072     | -0.193          |
| 2189 | Mephentoin                      | Prestwick | 14       | G   | 9      | -0.186    | -0.177          |
| 2190 | Cefepime hydrochloride          | Prestwick | 14       | H   | 9      | -0.831    | 0.009           |
| 2191 | Oxyphenbutazone                 | Prestwick | 14       | A   | 10     | -0.491    | -1.114          |
| 2192 | Propoxycaïne hydrochloride      | Prestwick | 14       | B   | 10     | -0.145    | -0.347          |
| 2193 | Mesalamine                      | Prestwick | 14       | C   | 10     | -0.483    | -0.35           |
| 2194 | Chlorambucal                    | Prestwick | 14       | D   | 10     | -0.076    | 0.05            |
| 2195 | (S)-(-)-Cycloserine             | Prestwick | 14       | E   | 10     | 0.741     | 0.277           |
| 2196 | Nialamide                       | Prestwick | 14       | F   | 10     | -0.277    | -0.343          |
| 2197 | Rifabutin                       | Prestwick | 14       | G   | 10     | -0.206    | 0.15            |
| 2198 | Clocoortolone pivalate          | Prestwick | 14       | H   | 10     | -0.102    | 0.151           |
| 2199 | Quinethazone                    | Prestwick | 14       | A   | 11     | -0.312    | -1.04           |
| 2200 | Oxaprozin                       | Prestwick | 14       | B   | 11     | -0.228    | -0.317          |
| 2201 | Vortioxat                       | Prestwick | 14       | C   | 11     | -0.113    | -1.483          |
| 2202 | Methiazole                      | Prestwick | 14       | D   | 11     | -0.488    | -0.188          |
| 2203 | Homosalate                      | Prestwick | 14       | E   | 11     | -0.189    | -0.001          |
| 2204 | Toltrazumil                     | Prestwick | 14       | F   | 11     | -0.048    | 0               |
| 2205 | Farbendazole                    | Prestwick | 14       | G   | 11     | 0.855     | -0.801          |
| 2206 | Nadifloxacin                    | Prestwick | 14       | H   | 11     | 0.858     | -0.408          |
| 2207 | Buspirone hydrochloride         | Prestwick | 15       | A   | 2      | -0.138    | 0.505           |
| 2208 | Acetylcysteine                  | Prestwick | 15       | B   | 2      | -0.85     | 1.181           |
| 2209 | Famciclovir                     | Prestwick | 15       | C   | 2      | -0.454    | 1.496           |
| 2210 | S-fluorouracil                  | Prestwick | 15       | D   | 2      | 0.263     | 0.81            |
| 2211 | Clofibrate                      | Prestwick | 15       | E   | 2      | 0.598     | 1.405           |
| 2212 | Topotecan                       | Prestwick | 15       | F   | 2      | -0.348    | -0.312          |
| 2213 | Gatifloxacin                    | Prestwick | 15       | G   | 2      | -0.286    | 0.824           |
| 2214 | Imatinib                        | Prestwick | 15       | H   | 2      | -1.015    | 0.879           |
| 2215 | Anastrozole                     | Prestwick | 15       | A   | 3      | -0.188    | 0.086           |
| 2216 | Melengestrol acetate            | Prestwick | 15       | B   | 3      | -0.156    | 0.913           |
| 2217 | Dopamine hydrochloride          | Prestwick | 15       | C   | 3      | -0.241    | 0.61            |
| 2218 | Mesna                           | Prestwick | 15       | D   | 3      | -0.009    | 0.06            |
| 2219 | Cyclophosphamide                | Prestwick | 15       | E   | 3      | 0.028     | 0.886           |
| 2220 | Atorvastatin                    | Prestwick | 15       | F   | 3      | 1.895     | -4.322          |
| 2221 | Bosentan                        | Prestwick | 15       | G   | 3      | -0.837    | 0.884           |
| 2222 | Moxifloxacin                    | Prestwick | 15       | H   | 3      | -1.538    | 0.303           |
| 2223 | Doxycycline hydrochloride       | Prestwick | 15       | A   | 4      | -0.539    | -0.808          |
| 2224 | Bromhexine hydrochloride        | Prestwick | 15       | B   | 4      | 0.36      | -0.069          |
| 2225 | Cefdinir                        | Prestwick | 15       | C   | 4      | -0.039    | 0.088           |
| 2226 | Mifotane                        | Prestwick | 15       | D   | 4      | 0.208     | 0.573           |
| 2227 | Aripiprazole                    | Prestwick | 15       | E   | 4      | 0.749     | 0.414           |
| 2228 | Azithromycin                    | Prestwick | 15       | F   | 4      | -0.772    | 0.284           |
| 2229 | Gemcitabine                     | Prestwick | 15       | G   | 4      | 0.109     | -0.259          |
| 2230 | Formoterol fumarate             | Prestwick | 15       | H   | 4      | -0.797    | 0.189           |
| 2231 | Sulbactam                       | Prestwick | 15       | A   | 5      | -0.091    | 0.031           |
| 2232 | Anethole-trithione              | Prestwick | 15       | B   | 5      | -0.691    | 0.145           |
| 2233 | Carprofen                       | Prestwick | 15       | C   | 5      | -0.103    | 0.584           |
| 2234 | Ambrisentan                     | Prestwick | 15       | D   | 5      | 0.192     | 0.45            |
| 2235 | Ethinylestradiol                | Prestwick | 15       | E   | 5      | -1.142    | 0.736           |
| 2236 | Ibudilast                       | Prestwick | 15       | F   | 5      | 0.304     | 0.856           |
| 2237 | Olimesartan                     | Prestwick | 15       | G   | 5      | -0.258    | 0.562           |
| 2238 | Rufloxacin                      | Prestwick | 15       | H   | 5      | -1.613    | 0.062           |
| 2239 | Fleroxacin                      | Prestwick | 15       | A   | 6      | 0.065     | -0.582          |
| 2240 | Amcinonide                      | Prestwick | 15       | B   | 6      | 0.434     | 0.383           |
| 2241 | Celecoxib                       | Prestwick | 15       | C   | 6      | 0.557     | 0.027           |
| 2242 | Triclosan                       | Prestwick | 15       | D   | 6      | 0.022     | 0.283           |
| 2243 | Fluocinonone acetoneide         | Prestwick | 15       | E   | 6      | 0.721     | 1.302           |
| 2244 | Losartan                        | Prestwick | 15       | F   | 6      | -0.505    | 0.255           |
| 2245 | Racepinephrine HCl              | Prestwick | 15       | G   | 6      | 0.471     | 0.384           |
| 2246 | Pravastatin                     | Prestwick | 15       | H   | 6      | 0.132     | -0.081          |
| 2247 | Potassium clavulanate           | Prestwick | 15       | A   | 7      | -0.486    | -0.713          |
| 2248 | Caffeine                        | Prestwick | 15       | B   | 7      | 0.405     | 0.415           |
| 2249 | Candesartan                     | Prestwick | 15       | C   | 7      | -0.044    | -0.283          |
| 2250 | Enoxacin                        | Prestwick | 15       | D   | 7      | 0.34      | -0.536          |
| 2251 | Sparfloxacin                    | Prestwick | 15       | E   | 7      | 0.01      | -0.062          |
| 2252 | Benzotropine mesylate           | Prestwick | 15       | F   | 7      | -0.052    | -0.243          |
| 2253 | Montelukast                     | Prestwick | 15       | G   | 7      | -0.266    | 0.949           |
| 2254 | Rosiglitazone                   | Prestwick | 15       | H   | 7      | 0.158     | -0.575          |
| 2255 | Valproic acid                   | Prestwick | 15       | A   | 8      | -0.664    | -0.537          |
| 2256 | Carvedilol                      | Prestwick | 15       | B   | 8      | -0.42     | -0.323          |
| 2257 | Fludarabine                     | Prestwick | 15       | C   | 8      | 0.241     | -0.454          |
| 2258 | Olopatadine hydrochloride       | Prestwick | 15       | D   | 8      | 0.586     | -0.358          |
| 2259 | Desloratadine                   | Prestwick | 15       | E   | 8      | -0.229    | 0.439           |

SUPPLEMENTARY DATA

|      | Name                          | Library   | Plate No | Row | Column | ROS score | viability score |
|------|-------------------------------|-----------|----------|-----|--------|-----------|-----------------|
| 2260 | Vecuronium bromide            | Prestwick | 15       | F   | 8      | 0.121     | 0.338           |
| 2261 | Docetaxel                     | Prestwick | 15       | G   | 8      | 0.381     | -1.176          |
| 2262 | Rivastigmine                  | Prestwick | 15       | H   | 8      | -1.725    | 0.531           |
| 2263 | Mepivacaine hydrochloride     | Prestwick | 15       | A   | 9      | -0.916    | -0.618          |
| 2264 | Methenamine                   | Prestwick | 15       | B   | 9      | 0.504     | -0.238          |
| 2265 | Cladribine                    | Prestwick | 15       | C   | 9      | 0.723     | -0.71           |
| 2266 | Granisetron                   | Prestwick | 15       | D   | 9      | 0.347     | -0.086          |
| 2267 | Clarithromycin                | Prestwick | 15       | E   | 9      | 0.898     | 0.089           |
| 2268 | Telmisartan                   | Prestwick | 15       | F   | 9      | -0.794    | 0.356           |
| 2269 | Cilnidipine                   | Prestwick | 15       | G   | 9      | -0.509    | 0.58            |
| 2270 | Sildenafil                    | Prestwick | 15       | H   | 9      | -1.213    | 0.369           |
| 2271 | Rifaximin                     | Prestwick | 15       | A   | 10     | 0.735     | -3.198          |
| 2272 | Phentermine hydrochloride     | Prestwick | 15       | B   | 10     | 0.883     | -1.152          |
| 2273 | Vardenafil                    | Prestwick | 15       | C   | 10     | 0.059     | 0.015           |
| 2274 | Anthrakinone                  | Prestwick | 15       | D   | 10     | 0.676     | -0.51           |
| 2275 | Trpelenamine hydrochloride    | Prestwick | 15       | E   | 10     | 0.4       | -0.262          |
| 2276 | Nalmefene hydrochloride       | Prestwick | 15       | F   | 10     | 0.021     | -0.348          |
| 2277 | Imiquimod                     | Prestwick | 15       | G   | 10     | -0.895    | 0.548           |
| 2278 | Acetylsalicylic acid          | Prestwick | 15       | H   | 10     | -1.483    | -0.008          |
| 2279 | Estradiol Valerate            | Prestwick | 15       | A   | 11     | -1.857    | -0.139          |
| 2280 | Diclazuril                    | Prestwick | 15       | B   | 11     | 0.096     | -1.128          |
| 2281 | Fluconazole                   | Prestwick | 15       | C   | 11     | -0.237    | -0.339          |
| 2282 | Lamotrigine                   | Prestwick | 15       | D   | 11     | 0.045     | 0.005           |
| 2283 | Tulobuterol                   | Prestwick | 15       | E   | 11     | -0.1      | 0.155           |
| 2284 | Bifonazole                    | Prestwick | 15       | F   | 11     | -0.194    | 0.828           |
| 2285 | Fosinopril                    | Prestwick | 15       | G   | 11     | -0.301    | 1.148           |
| 2286 | Hexachlorophene               | Prestwick | 15       | H   | 11     | 2.164     | -4.599          |
| 2287 | METAPROTERENOL                | US Drug   | 1        | B   | 2      | -0.788    | 1.12            |
| 2288 | METRONIDAZOLE                 | US Drug   | 1        | C   | 2      | -0.634    | 0.928           |
| 2289 | NIACIN                        | US Drug   | 1        | D   | 2      | -0.365    | 1.17            |
| 2290 | NOSCAPINE HYDROCHLORIDE       | US Drug   | 1        | E   | 2      | -0.178    | 0.637           |
| 2291 | PAPAVERINE HYDROCHLORIDE      | US Drug   | 1        | F   | 2      | -0.139    | -1.256          |
| 2292 | PHENYTOIN SODIUM              | US Drug   | 1        | G   | 2      | -1.156    | 1.324           |
| 2293 | METHACHOLINE CHLORIDE         | US Drug   | 1        | B   | 3      | -0.874    | 1.208           |
| 2294 | MINOCYCLINE HYDROCHLORIDE     | US Drug   | 1        | C   | 3      | 0.049     | 0.017           |
| 2295 | NIFEDIPINE                    | US Drug   | 1        | D   | 3      | 1.035     | 0.099           |
| 2296 | NOVOBIOCIN SODIUM             | US Drug   | 1        | E   | 3      | 0.225     | 0.869           |
| 2297 | PARACHLOROPHENOL              | US Drug   | 1        | F   | 3      | -0.438    | 0.998           |
| 2298 | FENOFIBRATE                   | US Drug   | 1        | G   | 3      | -0.782    | 2.076           |
| 2299 | METHIMAZOLE                   | US Drug   | 1        | B   | 4      | -0.881    | 1.307           |
| 2300 | MINOXIDIL                     | US Drug   | 1        | C   | 4      | -0.121    | -0.19           |
| 2301 | NITROFURANTOIN                | US Drug   | 1        | D   | 4      | -0.47     | -0.593          |
| 2302 | NYLIDRIN HYDROCHLORIDE        | US Drug   | 1        | E   | 4      | -0.218    | -0.392          |
| 2303 | PARGYLINE HYDROCHLORIDE       | US Drug   | 1        | F   | 4      | -0.222    | -0.324          |
| 2304 | FENOPROFEN                    | US Drug   | 1        | G   | 4      | -0.808    | 0.351           |
| 2305 | METHOCARBAMOL                 | US Drug   | 1        | B   | 5      | 0.131     | 2.158           |
| 2306 | MOXALACTAM DISODIUM           | US Drug   | 1        | C   | 5      | 0.133     | 0.501           |
| 2307 | OXYBUTYNYN CHLORIDE           | US Drug   | 1        | D   | 5      | -0.017    | -0.226          |
| 2308 | NYSTATIN                      | US Drug   | 1        | E   | 5      | 0.011     | 0.254           |
| 2309 | PENICILLAMINE                 | US Drug   | 1        | F   | 5      | -0.108    | 0.405           |
| 2310 | FLUFENAMIC ACID               | US Drug   | 1        | G   | 5      | -0.049    | 0.579           |
| 2311 | METHOTREXATE(+/-)             | US Drug   | 1        | B   | 6      | -0.42     | 0.049           |
| 2312 | NADIDE                        | US Drug   | 1        | C   | 6      | -0.098    | -0.351          |
| 2313 | NOREPINEPHRINE                | US Drug   | 1        | D   | 6      | 0.133     | -0.341          |
| 2314 | ORPHENADRINE CITRATE          | US Drug   | 1        | E   | 6      | -0.317    | -0.569          |
| 2315 | PHENACEMIDE                   | US Drug   | 1        | F   | 6      | -0.515    | 0.298           |
| 2316 | FENBENDAZOLE                  | US Drug   | 1        | G   | 6      | 0.87      | -3.287          |
| 2317 | METHOXAMINE HYDROCHLORIDE     | US Drug   | 1        | B   | 7      | -0.857    | 1.314           |
| 2318 | NAFILLIN SODIUM               | US Drug   | 1        | C   | 7      | -0.313    | 1.198           |
| 2319 | NORETHINDRONE                 | US Drug   | 1        | D   | 7      | 0.011     | -0.222          |
| 2320 | OXACILLIN SODIUM              | US Drug   | 1        | E   | 7      | -0.296    | -0.043          |
| 2321 | PHENAZOPYRIDINE HYDROCHLORIDE | US Drug   | 1        | F   | 7      | -0.278    | 0.844           |
| 2322 | FENSPIRIDE HYDROCHLORIDE      | US Drug   | 1        | G   | 7      | -0.587    | -0.395          |
| 2323 | METHYLDOPA                    | US Drug   | 1        | B   | 8      | -1.127    | 0.123           |
| 2324 | NALOXONE HYDROCHLORIDE        | US Drug   | 1        | C   | 8      | -0.556    | 0.438           |
| 2325 | NORETHYNODREL                 | US Drug   | 1        | D   | 8      | -0.309    | 0.371           |
| 2326 | OXYBENZONE                    | US Drug   | 1        | E   | 8      | -0.282    | 0.387           |
| 2327 | PHENELZINE SULFATE            | US Drug   | 1        | F   | 8      | -0.785    | -0.204          |
| 2328 | MEFENAMIC ACID                | US Drug   | 1        | G   | 8      | -0.859    | 0.89            |
| 2329 | METHYLPREDNISOLONE            | US Drug   | 1        | B   | 9      | 0.337     | 0.563           |
| 2330 | NAPHAZOLINE HYDROCHLORIDE     | US Drug   | 1        | C   | 9      | -0.013    | -0.577          |
| 2331 | NORFLOXACIN                   | US Drug   | 1        | D   | 9      | -0.051    | -1.228          |
| 2332 | OXYMETAZOLINE HYDROCHLORIDE   | US Drug   | 1        | E   | 9      | 0.195     | -0.882          |
| 2333 | PHENINDIONE                   | US Drug   | 1        | F   | 9      | -0.241    | -0.477          |
| 2334 | METHACYCLINE HYDROCHLORIDE    | US Drug   | 1        | G   | 9      | -0.423    | -0.01           |
| 2335 | METOCLOPRAMIDE HYDROCHLORIDE  | US Drug   | 1        | B   | 10     | 0.236     | -1.583          |
| 2336 | NAPROXEN(+)                   | US Drug   | 1        | C   | 10     | 1.86      | -1.034          |
| 2337 | NORGESTREL                    | US Drug   | 1        | D   | 10     | 0.464     | -0.482          |
| 2338 | OXYPHENBUTAZONE               | US Drug   | 1        | E   | 10     | 0.445     | -0.225          |
| 2339 | PHENIRAMINE MALEATE           | US Drug   | 1        | F   | 10     | 0.474     | -0.412          |
| 2340 | MEFEXAMIDE                    | US Drug   | 1        | G   | 10     | 0.046     | 0.016           |
| 2341 | METOPROLOL TARTRATE           | US Drug   | 1        | B   | 11     | -0.808    | -1.342          |
| 2342 | NEOSTIGMINE BROMIDE           | US Drug   | 1        | C   | 11     | 1.15      | -0.013          |
| 2343 | NORTRIPTYLINE                 | US Drug   | 1        | D   | 11     | 0.823     | -2.313          |
| 2344 | OXYTETRACYCLINE               | US Drug   | 1        | E   | 11     | -0.215    | -1.364          |
| 2345 | PHENYLBUTAZONE                | US Drug   | 1        | F   | 11     | 0.279     | -1.592          |
| 2346 | PROBUCOL                      | US Drug   | 1        | G   | 11     | 0.209     | -0.727          |
| 2347 | SULPIRIDE                     | US Drug   | 2        | B   | 2      | -0.517    | 0.198           |
| 2348 | ESTRADIOL ACETATE             | US Drug   | 2        | C   | 2      | -0.057    | -0.698          |
| 2349 | LISINAPRIL                    | US Drug   | 2        | D   | 2      | -0.387    | 0.96            |
| 2350 | SURAMIN                       | US Drug   | 2        | E   | 2      | -0.187    | -0.174          |
| 2351 | PHENYLETHYL ALCOHOL           | US Drug   | 2        | F   | 2      | 0.143     | -0.699          |
| 2352 | EDROPHONIUM CHLORIDE          | US Drug   | 2        | G   | 2      | -0.392    | 0.347           |
| 2353 | RANITIDINE                    | US Drug   | 2        | B   | 3      | -0.514    | 2.368           |
| 2354 | ECONAZOLE NITRATE             | US Drug   | 2        | C   | 3      | -0.107    | -0.481          |
| 2355 | BUMETANIDE                    | US Drug   | 2        | D   | 3      | -0.216    | 0.184           |
| 2356 | CEFUROXIME SODIUM             | US Drug   | 2        | E   | 3      | -0.536    | 0.364           |
| 2357 | MECLOCYCLINE SULFOSALICYLATE  | US Drug   | 2        | F   | 3      | -0.023    | -0.23           |
| 2358 | THIOPENTAL SODIUM             | US Drug   | 2        | G   | 3      | -0.431    | 0.821           |
| 2359 | SULOCTIDIL                    | US Drug   | 2        | B   | 4      | -0.918    | -0.801          |
| 2360 | FLUNISOLIDE                   | US Drug   | 2        | C   | 4      | 1.002     | 0.868           |
| 2361 | CARBENOXOLONE SODIUM          | US Drug   | 2        | D   | 4      | -0.216    | 1.09            |
| 2362 | VIGABATRIN                    | US Drug   | 2        | E   | 4      | 0.131     | 1.774           |
| 2363 | RIBOFLAVIN                    | US Drug   | 2        | F   | 4      | -0.279    | 0.6             |
| 2364 | CLOMIPRAMINE HYDROCHLORIDE    | US Drug   | 2        | G   | 4      | -0.696    | 0.31            |

SUPPLEMENTARY DATA

|      | Name                              | Library | Plate No | Row | Column | ROS score | viability score |
|------|-----------------------------------|---------|----------|-----|--------|-----------|-----------------|
| 2365 | RONIDAZOLE                        | US Drug | 2        | B   | 5      | -1.11     | 0.212           |
| 2366 | FLUMETHASONE                      | US Drug | 2        | C   | 5      | 0.934     | -2.473          |
| 2367 | FOLIC ACID                        | US Drug | 2        | D   | 5      | -0.484    | 0.335           |
| 2368 | LOMEFLOXACIN HYDROCHLORIDE        | US Drug | 2        | E   | 5      | -0.148    | 1.182           |
| 2369 | ACEBUTOLOL HYDROCHLORIDE          | US Drug | 2        | F   | 5      | -0.24     | -0.403          |
| 2370 | PHENFORMIN HYDROCHLORIDE          | US Drug | 2        | G   | 5      | -0.55     | 0.164           |
| 2371 | SULFAMETER                        | US Drug | 2        | B   | 6      | -0.623    | 0.523           |
| 2372 | XYLAZINE                          | US Drug | 2        | C   | 6      | 0.155     | 0.427           |
| 2373 | PHTHALYL SULFATHIAZOLE            | US Drug | 2        | D   | 6      | -0.515    | 1.26            |
| 2374 | CEFAMANDOLE SODIUM                | US Drug | 2        | E   | 6      | -0.18     | 0.843           |
| 2375 | ASPARTAME                         | US Drug | 2        | F   | 6      | 0.053     | -0.085          |
| 2376 | PENFLURIDOL                       | US Drug | 2        | G   | 6      | -0.483    | -0.23           |
| 2377 | SULFAMETHOXYPYRIDAZINE            | US Drug | 2        | B   | 7      | -0.815    | 1.002           |
| 2378 | TOLAZAMIDE                        | US Drug | 2        | C   | 7      | 0.013     | -0.293          |
| 2379 | SUCCINYL SULFATHIAZOLE            | US Drug | 2        | D   | 7      | -0.671    | 0.21            |
| 2380 | CEFMETAZOLE SODIUM                | US Drug | 2        | E   | 7      | -0.127    | 0.719           |
| 2381 | VARDENAFIL HYDROCHLORIDE          | US Drug | 2        | F   | 7      | -0.343    | -0.302          |
| 2382 | TILORONE                          | US Drug | 2        | G   | 7      | 0.084     | 0.559           |
| 2383 | SUPROFEN                          | US Drug | 2        | B   | 8      | -0.488    | -1.327          |
| 2384 | GALANTHAMINE HYDROBROMIDE         | US Drug | 2        | C   | 8      | -0.459    | -0.203          |
| 2385 | TRANEXAMIC ACID                   | US Drug | 2        | D   | 8      | -0.271    | -0.647          |
| 2386 | CEFOPERAZONE SODIUM               | US Drug | 2        | E   | 8      | 0.146     | -1.529          |
| 2387 | FLUORESCEN                        | US Drug | 2        | F   | 8      | 0.081     | 0.362           |
| 2388 | VINCISTINE SULFATE                | US Drug | 2        | G   | 8      | 0.925     | -2.894          |
| 2389 | SACCHARIN                         | US Drug | 2        | B   | 9      | -0.496    | 0.408           |
| 2390 | FENRETINIDE                       | US Drug | 2        | C   | 9      | -0.189    | -0.46           |
| 2391 | CEPHALEXIN                        | US Drug | 2        | D   | 9      | -0.712    | 1.723           |
| 2392 | OFLOXACIN                         | US Drug | 2        | E   | 9      | -0.181    | 0.068           |
| 2393 | NIACINAMIDE                       | US Drug | 2        | F   | 9      | 0.058     | -0.148          |
| 2394 | OMEPRAZOLE                        | US Drug | 2        | G   | 9      | 0.038     | -0.19           |
| 2395 | ACETANILIDE                       | US Drug | 2        | B   | 10     | -0.533    | -0.789          |
| 2396 | ENALAPRIL MALEATE                 | US Drug | 2        | C   | 10     | -0.196    | -1.848          |
| 2397 | OXOLINIC ACID                     | US Drug | 2        | D   | 10     | -0.232    | -1.065          |
| 2398 | BEZAFIBRATE                       | US Drug | 2        | E   | 10     | 0.481     | -2.482          |
| 2399 | PROPRANOLOL HYDROCHLORIDE (+/-)   | US Drug | 2        | F   | 10     | 0.728     | 0.041           |
| 2400 | ZOLMITRIPTAN                      | US Drug | 2        | G   | 10     | -0.095    | -0.051          |
| 2401 | FLURANDRENOLIDE                   | US Drug | 2        | B   | 11     | 1.112     | 0.499           |
| 2402 | KETOPROFEN                        | US Drug | 2        | C   | 11     | 0.049     | 0.3             |
| 2403 | CEFOXITIN SODIUM                  | US Drug | 2        | D   | 11     | 0.272     | 1.017           |
| 2404 | CETIRIZINE HYDROCHLORIDE          | US Drug | 2        | E   | 11     | 0.15      | -0.186          |
| 2405 | METHSCOPOLAMINE BROMIDE           | US Drug | 2        | F   | 11     | 0.714     | -1.411          |
| 2406 | DEBRISOQUIN SULFATE               | US Drug | 2        | G   | 11     | 0.222     | 0.502           |
| 2407 | PIRACETAM                         | US Drug | 3        | B   | 2      | -0.981    | 0.508           |
| 2408 | SENNOSIDE A                       | US Drug | 3        | C   | 2      | -0.705    | 0.137           |
| 2409 | METAXALONE                        | US Drug | 3        | D   | 2      | -0.679    | 0.328           |
| 2410 | PROPOFOL                          | US Drug | 3        | E   | 2      | -0.713    | 0.279           |
| 2411 | RANOLAZINE                        | US Drug | 3        | F   | 2      | -0.551    | -0.529          |
| 2412 | LEVALBUTEROL HYDROCHLORIDE        | US Drug | 3        | G   | 2      | -0.963    | -0.181          |
| 2413 | GLUCONOLACTONE                    | US Drug | 3        | B   | 3      | -0.555    | 0.487           |
| 2414 | TENIPOSIDE                        | US Drug | 3        | C   | 3      | 0.543     | -0.866          |
| 2415 | CHLOROGUANIDE HYDROCHLORIDE       | US Drug | 3        | D   | 3      | 2.245     | -4.149          |
| 2416 | GRISEOFULVIN                      | US Drug | 3        | E   | 3      | -0.175    | -0.041          |
| 2417 | DANTHRON                          | US Drug | 3        | F   | 3      | -0.448    | 0.26            |
| 2418 | METFORMIN HYDROCHLORIDE           | US Drug | 3        | G   | 3      | -0.973    | 0.48            |
| 2419 | AZLOCILLIN SODIUM                 | US Drug | 3        | B   | 4      | -0.424    | 0.211           |
| 2420 | TANNIC ACID                       | US Drug | 3        | C   | 4      | -0.92     | -0.685          |
| 2421 | CLARITHROMYCIN                    | US Drug | 3        | D   | 4      | -0.551    | -0.024          |
| 2422 | BENAZEPRIL HYDROCHLORIDE          | US Drug | 3        | E   | 4      | 0.01      | -0.029          |
| 2423 | ACEDAPSONE                        | US Drug | 3        | F   | 4      | -0.421    | -0.082          |
| 2424 | PREGABALIN                        | US Drug | 3        | G   | 4      | -0.696    | 0.288           |
| 2425 | CHOLINE CHLORIDE                  | US Drug | 3        | B   | 5      | -0.615    | 0.548           |
| 2426 | CARPROFEN                         | US Drug | 3        | C   | 5      | -0.182    | 0.427           |
| 2427 | HYDROQUINONE                      | US Drug | 3        | D   | 5      | -0.931    | 0.331           |
| 2428 | VALSARTAN                         | US Drug | 3        | E   | 5      | -0.322    | 0.982           |
| 2429 | ATOMOXETINE HYDROCHLORIDE         | US Drug | 3        | F   | 5      | 0.411     | 0.784           |
| 2430 | TOPOTECAN HYDROCHLORIDE           | US Drug | 3        | G   | 5      | 0.806     | -1.28           |
| 2431 | ATORVASTATIN CALCIUM              | US Drug | 3        | B   | 6      | 2.039     | -3.105          |
| 2432 | HYDROXYCHLOROQUINE SULFATE        | US Drug | 3        | C   | 6      | -0.215    | 0.314           |
| 2433 | NATEGLINIDE                       | US Drug | 3        | D   | 6      | -0.132    | 0.42            |
| 2434 | SAL SALATE                        | US Drug | 3        | E   | 6      | -0.176    | 0.194           |
| 2435 | DESOXYCORTICOSTERONE ACETATE      | US Drug | 3        | F   | 6      | -0.079    | 0.748           |
| 2436 | PHENOXYBENZAMINE HYDROCHLORIDE    | US Drug | 3        | G   | 6      | -0.518    | 0.256           |
| 2437 | OXYPHENCYCLIMINE HYDROCHLORIDE    | US Drug | 3        | B   | 7      | -0.42     | 0.731           |
| 2438 | DIRITHROMYCIN                     | US Drug | 3        | C   | 7      | -0.295    | 0.625           |
| 2439 | CANDESARTAN CILEXIL               | US Drug | 3        | D   | 7      | -0.781    | 0.821           |
| 2440 | HYDROCORTISONE                    | US Drug | 3        | E   | 7      | 0.006     | 0.567           |
| 2441 | TRAMADOL HYDROCHLORIDE            | US Drug | 3        | F   | 7      | -0.288    | 0.366           |
| 2442 | PINACIDIL                         | US Drug | 3        | G   | 7      | -0.882    | 0.06            |
| 2443 | PROPAFENONE HYDROCHLORIDE         | US Drug | 3        | B   | 8      | -0.13     | 0.383           |
| 2444 | MEPIVACAINE HYDROCHLORIDE         | US Drug | 3        | C   | 8      | 0.079     | 0.427           |
| 2445 | ROSIGLITAZONE                     | US Drug | 3        | D   | 8      | -0.052    | -0.016          |
| 2446 | RIFAXIMIN                         | US Drug | 3        | E   | 8      | -0.047    | -0.182          |
| 2447 | TERBINAFINE HYDROCHLORIDE         | US Drug | 3        | F   | 8      | -0.06     | 0.145           |
| 2448 | VERAPAMIL HYDROCHLORIDE           | US Drug | 3        | G   | 8      | -0.179    | 0.325           |
| 2449 | FLUCONAZOLE                       | US Drug | 3        | B   | 9      | -0.422    | 0.405           |
| 2450 | NILUTAMIDE                        | US Drug | 3        | C   | 9      | -0.01     | -0.34           |
| 2451 | LOSARTAN                          | US Drug | 3        | D   | 9      | -0.25     | 0.369           |
| 2452 | CANRENONE                         | US Drug | 3        | E   | 9      | 0.315     | 0.052           |
| 2453 | TOPIRAMATE                        | US Drug | 3        | F   | 9      | -0.107    | 0.459           |
| 2454 | PANTOPRAZOLE                      | US Drug | 3        | G   | 9      | -0.51     | 0.497           |
| 2455 | LOVASTATIN                        | US Drug | 3        | B   | 10     | 2.89      | -4.389          |
| 2456 | AMINOLEVULINIC ACID HYDROCHLORIDE | US Drug | 3        | C   | 10     | 0.259     | 0.524           |
| 2457 | HOMOSALATE                        | US Drug | 3        | D   | 10     | 0.389     | 0.486           |
| 2458 | MODAFINIL                         | US Drug | 3        | E   | 10     | -0.124    | 0.329           |
| 2459 | GEMIFLOXACIN MESYLATE             | US Drug | 3        | F   | 10     | -0.359    | 0.191           |
| 2460 | LOPERAMIDE HYDROCHLORIDE          | US Drug | 3        | G   | 10     | -0.57     | 0.218           |
| 2461 | ATROPINE OXIDE                    | US Drug | 3        | B   | 11     | 0.238     | 1.005           |
| 2462 | PARAMETHADONE                     | US Drug | 3        | C   | 11     | 0.272     | -0.04           |
| 2463 | SALICYLANILIDE                    | US Drug | 3        | D   | 11     | 0.818     | -0.485          |
| 2464 | CLIOQUINOL                        | US Drug | 3        | E   | 11     | -0.103    | -0.294          |
| 2465 | PRAVASTATIN SODIUM                | US Drug | 3        | F   | 11     | -0.313    | 0.534           |
| 2466 | PODOFILOX                         | US Drug | 3        | G   | 11     | 0.906     | -0.56           |
| 2467 | IVERMECTIN                        | US Drug | 4        | B   | 2      | 0.454     | 0.474           |
| 2468 | ADENOSINE                         | US Drug | 4        | C   | 2      | -0.224    | 1.21            |
| 2469 | AMODIAQUINE DIHYDROCHLORIDE       | US Drug | 4        | D   | 2      | 0.213     | 0.137           |



SUPPLEMENTARY DATA

|      | Name                           | Library | Plate No | Row | Column | ROS score | viability score |
|------|--------------------------------|---------|----------|-----|--------|-----------|-----------------|
| 2470 | ATROPINE SULFATE               | US Drug | 4        | E   | 2      | -0.229    | 0.044           |
| 2471 | beta-CAROTENE                  | US Drug | 4        | F   | 2      | -0.528    | 0.508           |
| 2472 | CARBACHOL                      | US Drug | 4        | G   | 2      | -0.8      | 0.429           |
| 2473 | SODIUM NITROPRUSSIDE           | US Drug | 4        | B   | 3      | 0.104     | 0.244           |
| 2474 | ALLOPURINOL                    | US Drug | 4        | C   | 3      | 0.129     | -0.09           |
| 2475 | AMOXICILLIN                    | US Drug | 4        | D   | 3      | -1.475    | 6.673           |
| 2476 | AUROTHIOGLUCOSE                | US Drug | 4        | E   | 3      | -1.008    | 0.147           |
| 2477 | BETAMETHASONE                  | US Drug | 4        | F   | 3      | 0.501     | -0.133          |
| 2478 | CARBAMAZEPINE                  | US Drug | 4        | G   | 3      | -1.554    | -0.141          |
| 2479 | SODIUM OXYBATE                 | US Drug | 4        | B   | 4      | -0.112    | 0.077           |
| 2480 | ALVERINE CITRATE               | US Drug | 4        | C   | 4      | 0.246     | -0.048          |
| 2481 | AMPHOTERICIN B                 | US Drug | 4        | D   | 4      | 0.224     | -0.013          |
| 2482 | AZATHIOPRINE                   | US Drug | 4        | E   | 4      | 0.057     | 0.04            |
| 2483 | BETHANECHOL CHLORIDE           | US Drug | 4        | F   | 4      | -0.224    | -0.138          |
| 2484 | CARBENICILLIN DISODIUM         | US Drug | 4        | G   | 4      | -0.768    | -0.123          |
| 2485 | ETHYL PARABEN                  | US Drug | 4        | B   | 5      | 0.325     | 0.292           |
| 2486 | AMANTADINE HYDROCHLORIDE       | US Drug | 4        | C   | 5      | 0.281     | 0.052           |
| 2487 | AMPICILLIN SODIUM              | US Drug | 4        | D   | 5      | 0.605     | 0.244           |
| 2488 | BACITRACIN                     | US Drug | 4        | E   | 5      | 0.12      | 0.335           |
| 2489 | BISACODYL                      | US Drug | 4        | F   | 5      | -0.194    | 0.009           |
| 2490 | CARBINOXAMINE MALEATE          | US Drug | 4        | G   | 5      | -1.021    | 0.098           |
| 2491 | COUMARIN                       | US Drug | 4        | B   | 6      | -0.082    | 0.188           |
| 2492 | AMIKACIN SULFATE               | US Drug | 4        | C   | 6      | 0.423     | -0.131          |
| 2493 | AMPROLIUM                      | US Drug | 4        | D   | 6      | 0.328     | 0.054           |
| 2494 | BACLOFEN                       | US Drug | 4        | E   | 6      | -0.157    | 0.182           |
| 2495 | BITHIONATE SODIUM              | US Drug | 4        | F   | 6      | 0.003     | -0.122          |
| 2496 | CARISOPRODOL                   | US Drug | 4        | G   | 6      | -0.987    | -0.174          |
| 2497 | ACETAMINOPHEN                  | US Drug | 4        | B   | 7      | 0.089     | 0.032           |
| 2498 | AMILORIDE HYDROCHLORIDE        | US Drug | 4        | C   | 7      | 0.443     | 0.1             |
| 2499 | ANTAZOLINE PHOSPHATE           | US Drug | 4        | D   | 7      | 0.528     | -0.022          |
| 2500 | BECLOMETHASONE DIPROPIONATE    | US Drug | 4        | E   | 7      | 0.802     | -0.262          |
| 2501 | BROMOCRIPTINE MESYLATE         | US Drug | 4        | F   | 7      | 0.488     | -0.341          |
| 2502 | CEFADROXIL                     | US Drug | 4        | G   | 7      | -0.909    | -0.458          |
| 2503 | ACETAZOLAMIDE                  | US Drug | 4        | B   | 8      | 0.182     | -0.175          |
| 2504 | AMINOCAPROIC ACID              | US Drug | 4        | C   | 8      | 0.529     | -0.365          |
| 2505 | ANTHRALIN                      | US Drug | 4        | D   | 8      | -0.011    | -0.183          |
| 2506 | BENSERAZIDE HYDROCHLORIDE      | US Drug | 4        | E   | 8      | -0.185    | -0.17           |
| 2507 | BUSULFAN                       | US Drug | 4        | F   | 8      | -0.109    | -0.072          |
| 2508 | CEFOTAXIME SODIUM              | US Drug | 4        | G   | 8      | -1.496    | -0.196          |
| 2509 | ACETOHYDROXAMIC ACID           | US Drug | 4        | B   | 9      | -0.014    | -0.434          |
| 2510 | AMINOGLUTETHIMIDE              | US Drug | 4        | C   | 9      | 0.532     | -0.367          |
| 2511 | ANTIPYRINE                     | US Drug | 4        | D   | 9      | 0.532     | -0.21           |
| 2512 | BENZETHONIUM CHLORIDE          | US Drug | 4        | E   | 9      | 2.143     | -2.9            |
| 2513 | CAFFEINE                       | US Drug | 4        | F   | 9      | -0.262    | -0.088          |
| 2514 | CEPHALOTHIN SODIUM             | US Drug | 4        | G   | 9      | -1.55     | -0.493          |
| 2515 | ACETYLCHOLINE                  | US Drug | 4        | B   | 10     | -0.147    | -0.547          |
| 2516 | AMINOSALICYLATE SODIUM         | US Drug | 4        | C   | 10     | 0.003     | -0.324          |
| 2517 | APOMORPHINE HYDROCHLORIDE      | US Drug | 4        | D   | 10     | 0.316     | -0.609          |
| 2518 | BENZOCAINE                     | US Drug | 4        | E   | 10     | 0.079     | -0.108          |
| 2519 | CAMPHOR (1R)                   | US Drug | 4        | F   | 10     | -0.52     | 0.231           |
| 2520 | CEPHAPIRIN SODIUM              | US Drug | 4        | G   | 10     | -1.101    | -0.079          |
| 2521 | ACETYLCYSTEINE                 | US Drug | 4        | B   | 11     | 0.04      | -0.631          |
| 2522 | AMITRIPTYLINE HYDROCHLORIDE    | US Drug | 4        | C   | 11     | 0.222     | -0.683          |
| 2523 | ASPIRIN                        | US Drug | 4        | D   | 11     | 0.281     | -0.59           |
| 2524 | BENZTHIAZIDE                   | US Drug | 4        | E   | 11     | 0.09      | -0.284          |
| 2525 | CAPREOMYCIN SULFATE            | US Drug | 4        | F   | 11     | -0.168    | -0.133          |
| 2526 | CEPHRADINE                     | US Drug | 4        | G   | 11     | -0.769    | -0.081          |
| 2527 | CLEMASTINE                     | US Drug | 5        | B   | 2      | -0.445    | 0.042           |
| 2528 | CORTISONE ACETATE              | US Drug | 5        | C   | 2      | -0.54     | 1.074           |
| 2529 | DACARBAZINE                    | US Drug | 5        | D   | 2      | -0.484    | 0.085           |
| 2530 | DEXAMETHASONE SODIUM PHOSPHATE | US Drug | 5        | E   | 2      | 0.575     | 0.932           |
| 2531 | DIETHYLSTILBESTROL             | US Drug | 5        | F   | 2      | -0.319    | 1.045           |
| 2532 | DIPHENYLPYRALINE HYDROCHLORIDE | US Drug | 5        | G   | 2      | -0.891    | 1.22            |
| 2533 | CLIDINIUM BROMIDE              | US Drug | 5        | B   | 3      | -0.363    | 0.084           |
| 2534 | COTININE                       | US Drug | 5        | C   | 3      | -0.141    | 1.182           |
| 2535 | DANAZOL                        | US Drug | 5        | D   | 3      | 0.295     | 0.833           |
| 2536 | DEXTROMETHORPHAN HYDROBROMIDE  | US Drug | 5        | E   | 3      | 0.021     | 0.509           |
| 2537 | DIFLUNISAL                     | US Drug | 5        | F   | 3      | -0.262    | 0.431           |
| 2538 | DIPYRIDAMOLE                   | US Drug | 5        | G   | 3      | -0.001    | 0.793           |
| 2539 | CLINDAMYCIN HYDROCHLORIDE      | US Drug | 5        | B   | 4      | -0.368    | 0.016           |
| 2540 | CRESOL                         | US Drug | 5        | C   | 4      | -0.242    | 0.484           |
| 2541 | DAPSONE                        | US Drug | 5        | D   | 4      | -0.215    | 0.475           |
| 2542 | DIBENZOTHIOPHENE               | US Drug | 5        | E   | 4      | 0.079     | 0.65            |
| 2543 | DIGITOXIN                      | US Drug | 5        | F   | 4      | -0.019    | 0.406           |
| 2544 | PYRITHIONE ZINC                | US Drug | 5        | G   | 4      | 2.818     | -4.303          |
| 2545 | CLOMIPHENE CITRATE             | US Drug | 5        | B   | 5      | -0.012    | 0.917           |
| 2546 | CROMOLYN SODIUM                | US Drug | 5        | C   | 5      | -0.042    | 0.297           |
| 2547 | DAUNORUBICIN                   | US Drug | 5        | D   | 5      | 2.568     | -4.728          |
| 2548 | DIBUCAINE HYDROCHLORIDE        | US Drug | 5        | E   | 5      | -0.541    | -0.168          |
| 2549 | DIGOXIN                        | US Drug | 5        | F   | 5      | -0.272    | -0.291          |
| 2550 | DISOPYRAMIDE PHOSPHATE         | US Drug | 5        | G   | 5      | -0.27     | 0.745           |
| 2551 | CLONIDINE HYDROCHLORIDE        | US Drug | 5        | B   | 6      | -0.014    | 0.145           |
| 2552 | CYCLIZINE                      | US Drug | 5        | C   | 6      | -0.387    | -0.302          |
| 2553 | SODIUM DEHYDROCHOLATE          | US Drug | 5        | D   | 6      | -0.202    | 0.15            |
| 2554 | DICLOFENAC SODIUM              | US Drug | 5        | E   | 6      | -0.429    | -0.034          |
| 2555 | DIHYDROERGOTAMINE MESYLATE     | US Drug | 5        | F   | 6      | -0.252    | -0.238          |
| 2556 | DISULFIRAM                     | US Drug | 5        | G   | 6      | -0.256    | 0.484           |
| 2557 | CLOTIRIMAZOLE                  | US Drug | 5        | B   | 7      | -0.529    | -0.638          |
| 2558 | CYCLOPENTOLATE HYDROCHLORIDE   | US Drug | 5        | C   | 7      | -0.263    | -0.695          |
| 2559 | DEMECLOCYCLINE HYDROCHLORIDE   | US Drug | 5        | D   | 7      | -0.136    | -0.678          |
| 2560 | DICLOXACILLIN SODIUM           | US Drug | 5        | E   | 7      | -0.207    | 0.131           |
| 2561 | DIHYDROSTREPTOMYCIN SULFATE    | US Drug | 5        | F   | 7      | -0.347    | -0.19           |
| 2562 | DOPAMINE HYDROCHLORIDE         | US Drug | 5        | G   | 7      | -0.528    | -0.054          |
| 2563 | CLOXACILLIN SODIUM             | US Drug | 5        | B   | 8      | -1.055    | -0.376          |
| 2564 | CYCLOPHOSPHAMIDE HYDRATE       | US Drug | 5        | C   | 8      | -0.891    | -0.184          |
| 2565 | DESIPRAMINE HYDROCHLORIDE      | US Drug | 5        | D   | 8      | -0.337    | -0.25           |
| 2566 | DICUMAROL                      | US Drug | 5        | E   | 8      | -0.433    | 0.007           |
| 2567 | DIMENHYDRINATE                 | US Drug | 5        | F   | 8      | -0.698    | 0.133           |
| 2568 | DOXEPIN HYDROCHLORIDE          | US Drug | 5        | G   | 8      | -0.896    | -0.181          |
| 2569 | CLOXYQUIN                      | US Drug | 5        | B   | 9      | -0.591    | -0.355          |
| 2570 | CYCLOSERINE                    | US Drug | 5        | C   | 9      | -0.249    | -0.222          |
| 2571 | DEXAMETHASONE                  | US Drug | 5        | D   | 9      | 0.905     | -0.354          |
| 2572 | DICYCLIMINE HYDROCHLORIDE      | US Drug | 5        | E   | 9      | 0.027     | 0.204           |
| 2573 | DIMETHADIONE                   | US Drug | 5        | F   | 9      | -0.426    | 0.365           |
| 2574 | DOXYCYCLINE HYDROCHLORIDE      | US Drug | 5        | G   | 9      | -0.583    | 0.183           |

SUPPLEMENTARY DATA

|      | Name                                   | Library | Plate No | Row | Column | ROS score | viability score |
|------|----------------------------------------|---------|----------|-----|--------|-----------|-----------------|
| 2575 | COLCHICINE                             | US Drug | 5        | B   | 10     | 1.179     | -0.991          |
| 2576 | CYPROTERONE ACETATE                    | US Drug | 5        | C   | 10     | 0.314     | -0.435          |
| 2577 | DEXAMETHASONE ACETATE                  | US Drug | 5        | D   | 10     | 1.063     | -0.425          |
| 2578 | DIENESTROL                             | US Drug | 5        | E   | 10     | -0.159    | 0.235           |
| 2579 | DIOXYBENZONE                           | US Drug | 5        | F   | 10     | -0.202    | 0.174           |
| 2580 | DOXYLAMINE SUCCINATE                   | US Drug | 5        | G   | 10     | -0.272    | -0.21           |
| 2581 | COLISTIMETHATE SODIUM                  | US Drug | 5        | B   | 11     | 0.089     | -0.007          |
| 2582 | CYTARABINE                             | US Drug | 5        | C   | 11     | 1.072     | -0.859          |
| 2583 | DEFEROXAMINE MESYLATE                  | US Drug | 5        | D   | 11     | 0.182     | -0.099          |
| 2584 | DIETHYLCARBAMAZINE CITRATE             | US Drug | 5        | E   | 11     | -0.011    | 0.044           |
| 2585 | DIPHENHYDRAMINE HYDROCHLORIDE          | US Drug | 5        | F   | 11     | -0.215    | -0.132          |
| 2586 | DYCLONINE HYDROCHLORIDE                | US Drug | 5        | G   | 11     | -0.9      | 0.182           |
| 2587 | FLUDROCORTISONE ACETATE                | US Drug | 6        | B   | 2      | 0.163     | -0.073          |
| 2588 | GALLAMINE TRIETHIODIDE                 | US Drug | 6        | C   | 2      | -0.776    | 0.591           |
| 2589 | HALOPERIDOL                            | US Drug | 6        | D   | 2      | -0.497    | 0.485           |
| 2590 | HYDROCORTISONE HEMISUCCINATE           | US Drug | 6        | E   | 2      | -0.114    | 0.403           |
| 2591 | INDOMETHACIN                           | US Drug | 6        | F   | 2      | -0.788    | 0.704           |
| 2592 | KANAMYCIN A SULFATE                    | US Drug | 6        | G   | 2      | -0.937    | 0.802           |
| 2593 | FLUMETHAZONE PIVALATE                  | US Drug | 6        | B   | 3      | 0.602     | 0.147           |
| 2594 | GEMFIBROZIL                            | US Drug | 6        | C   | 3      | -0.377    | 0.216           |
| 2595 | HETACILLIN POTASSIUM                   | US Drug | 6        | D   | 3      | -0.312    | 0.504           |
| 2596 | HYDROCORTISONE PHOSPHATE TRIETHYLAMINE | US Drug | 6        | E   | 3      | 0.183     | 0.644           |
| 2597 | INDOPROFEN                             | US Drug | 6        | F   | 3      | -0.661    | 0.775           |
| 2598 | KETOCONAZOLE                           | US Drug | 6        | G   | 3      | 0.31      | -0.874          |
| 2599 | FLUOCINOLONE ACETONIDE                 | US Drug | 6        | B   | 4      | 0.823     | 0.358           |
| 2600 | GENTAMICIN SULFATE                     | US Drug | 6        | C   | 4      | -0.054    | 0.124           |
| 2601 | HEXACHLOROPHENE                        | US Drug | 6        | D   | 4      | 2.503     | -4.255          |
| 2602 | HYDROFLUMETHIAZIDE                     | US Drug | 6        | E   | 4      | 0.105     | 0.674           |
| 2603 | INOSITOL                               | US Drug | 6        | F   | 4      | -0.362    | 0.146           |
| 2604 | LACTULOSE                              | US Drug | 6        | G   | 4      | -0.592    | 0.433           |
| 2605 | FLUOCINONIDE                           | US Drug | 6        | B   | 5      | 0.783     | 0.466           |
| 2606 | GENTIAN VIOLET                         | US Drug | 6        | C   | 5      | 2.671     | -3.732          |
| 2607 | HEXYLRESORCINOL                        | US Drug | 6        | D   | 5      | -0.098    | 0.776           |
| 2608 | HYDROXYPROGESTERONE CAPROATE           | US Drug | 6        | E   | 5      | 0.347     | 0.912           |
| 2609 | IODOQUINOL                             | US Drug | 6        | F   | 5      | -0.321    | 0.664           |
| 2610 | LEUCOVORIN CALCIUM                     | US Drug | 6        | G   | 5      | -0.232    | 0.738           |
| 2611 | FLUOROMETHOLONE                        | US Drug | 6        | B   | 6      | 0.643     | -0.348          |
| 2612 | GLUCOSAMINE HYDROCHLORIDE              | US Drug | 6        | C   | 6      | -0.201    | 0.041           |
| 2613 | HISTAMINE DIHYDROCHLORIDE              | US Drug | 6        | D   | 6      | -0.181    | -0.128          |
| 2614 | HYDROXYUREA                            | US Drug | 6        | E   | 6      | -0.896    | -0.1            |
| 2615 | IPRATROPIUM BROMIDE                    | US Drug | 6        | F   | 6      | 0.175     | -0.674          |
| 2616 | LEVONORDEFRIN                          | US Drug | 6        | G   | 6      | -0.066    | -0.206          |
| 2617 | FLUOROURACIL                           | US Drug | 6        | B   | 7      | 0.663     | 0.333           |
| 2618 | GRAMICIDIN                             | US Drug | 6        | C   | 7      | 2.272     | -4.086          |
| 2619 | HOMATROPINE BROMIDE                    | US Drug | 6        | D   | 7      | -0.371    | 0.824           |
| 2620 | HYDROXYZINE PAMOATE                    | US Drug | 6        | E   | 7      | -0.049    | 0.272           |
| 2621 | ISONIAZID                              | US Drug | 6        | F   | 7      | -0.298    | 0.403           |
| 2622 | LINCOMYCIN HYDROCHLORIDE               | US Drug | 6        | G   | 7      | -0.512    | 0.095           |
| 2623 | FLURBIPROFEN                           | US Drug | 6        | B   | 8      | 0.258     | 0.237           |
| 2624 | GUAIFENESIN                            | US Drug | 6        | C   | 8      | -0.649    | 0.009           |
| 2625 | HOMATROPINE METHYLBROMIDE              | US Drug | 6        | D   | 8      | -0.55     | 0.32            |
| 2626 | HYOSCYAMINE                            | US Drug | 6        | E   | 8      | -0.715    | 0.363           |
| 2627 | ISOPROPAMIDE IODIDE                    | US Drug | 6        | F   | 8      | -0.586    | 0.066           |
| 2628 | MEDROXYPROGESTERONE ACETATE            | US Drug | 6        | G   | 8      | -0.184    | 0.243           |
| 2629 | FURAZOLIDONE                           | US Drug | 6        | B   | 9      | -1.389    | -0.062          |
| 2630 | GUANABENZ ACETATE                      | US Drug | 6        | C   | 9      | -0.101    | 0.108           |
| 2631 | HYDRALAZINE HYDROCHLORIDE              | US Drug | 6        | D   | 9      | -0.716    | 0.191           |
| 2632 | IBUPROFEN                              | US Drug | 6        | E   | 9      | -0.182    | -0.154          |
| 2633 | ISOPROTERENOL HYDROCHLORIDE            | US Drug | 6        | F   | 9      | -0.631    | -0.021          |
| 2634 | MEPENZOLATE BROMIDE                    | US Drug | 6        | G   | 9      | -0.979    | 0.069           |
| 2635 | FUROSEMIDE                             | US Drug | 6        | B   | 10     | -0.329    | -0.223          |
| 2636 | GUANETHIDINE SULFATE                   | US Drug | 6        | C   | 10     | -0.174    | 0.113           |
| 2637 | HYDROCHLOROTHIAZIDE                    | US Drug | 6        | D   | 10     | 0.056     | -0.007          |
| 2638 | IMIPRAMINE HYDROCHLORIDE               | US Drug | 6        | E   | 10     | -0.33     | -0.137          |
| 2639 | ISOSORBIDE DINITRATE                   | US Drug | 6        | F   | 10     | -0.065    | -0.417          |
| 2640 | MERCAPTOPYRINE                         | US Drug | 6        | G   | 10     | -0.33     | 0.384           |
| 2641 | FUSIDIC ACID                           | US Drug | 6        | B   | 11     | 0.562     | 0.284           |
| 2642 | HALAZONE                               | US Drug | 6        | C   | 11     | -0.312    | -0.067          |
| 2643 | HYDROCORTISONE ACETATE                 | US Drug | 6        | D   | 11     | 0.311     | 0.141           |
| 2644 | INDAPAMIDE                             | US Drug | 6        | E   | 11     | -0.193    | 0.034           |
| 2645 | ISOSUPRINE HYDROCHLORIDE               | US Drug | 6        | F   | 11     | -0.323    | 0.032           |
| 2646 | METHENAMINE                            | US Drug | 6        | G   | 11     | -0.287    | 0.441           |
| 2647 | PIPERAZINE                             | US Drug | 7        | B   | 2      | -0.703    | 0.72            |
| 2648 | PROBENECID                             | US Drug | 7        | C   | 2      | -0.007    | 1.002           |
| 2649 | PYRANTEL PAMOATE                       | US Drug | 7        | D   | 2      | -0.248    | 0.985           |
| 2650 | RESORCINOL                             | US Drug | 7        | E   | 2      | -0.402    | 0.364           |
| 2651 | STREPTOZOSIN                           | US Drug | 7        | F   | 2      | -0.266    | 0.573           |
| 2652 | SULFATHIAZOLE                          | US Drug | 7        | G   | 2      | -0.408    | 0.688           |
| 2653 | PIROXICAM                              | US Drug | 7        | B   | 3      | -0.369    | 0.047           |
| 2654 | PROCAINAMIDE HYDROCHLORIDE             | US Drug | 7        | C   | 3      | -0.088    | 0.24            |
| 2655 | PYRAZINAMIDE                           | US Drug | 7        | D   | 3      | -0.154    | 0.368           |
| 2656 | RIFAMPIN                               | US Drug | 7        | E   | 3      | -0.054    | 0.047           |
| 2657 | SULFABENZAMIDE                         | US Drug | 7        | F   | 3      | -0.163    | 0.12            |
| 2658 | SULFINPYRAZONE                         | US Drug | 7        | G   | 3      | -0.308    | 0.129           |
| 2659 | POLYMYXIN B SULFATE                    | US Drug | 7        | B   | 4      | -0.39     | -0.108          |
| 2660 | PROCAINE HYDROCHLORIDE                 | US Drug | 7        | C   | 4      | 0.067     | -0.347          |
| 2661 | PYRILAMINE MALEATE                     | US Drug | 7        | D   | 4      | 0.26      | -0.228          |
| 2662 | ROXARSONE                              | US Drug | 7        | E   | 4      | 0.085     | 0.16            |
| 2663 | SULFACETAMIDE                          | US Drug | 7        | F   | 4      | 0.165     | -0.312          |
| 2664 | SULFISOXAZOLE                          | US Drug | 7        | G   | 4      | -0.308    | 0.494           |
| 2665 | PRAZQUANTEL                            | US Drug | 7        | B   | 5      | 0.002     | 0.372           |
| 2666 | PROCHLORPERAZINE EDISYLATE             | US Drug | 7        | C   | 5      | -0.427    | -0.835          |
| 2667 | PYRIMETHAMINE                          | US Drug | 7        | D   | 5      | 0.445     | -0.711          |
| 2668 | SALICYL ALCOHOL                        | US Drug | 7        | E   | 5      | -0.402    | -0.425          |
| 2669 | SULFADIAZINE                           | US Drug | 7        | F   | 5      | -0.128    | -0.309          |
| 2670 | SULINDAC                               | US Drug | 7        | G   | 5      | -0.163    | 0.473           |
| 2671 | PRazosin HYDROCHLORIDE                 | US Drug | 7        | B   | 6      | -0.316    | 0.394           |
| 2672 | PROCYCLIDINE HYDROCHLORIDE             | US Drug | 7        | C   | 6      | 0.33      | -0.602          |
| 2673 | PYRVINIUM PAMOATE                      | US Drug | 7        | D   | 6      | ?????     | -5.436          |
| 2674 | SALICYLAMIDE                           | US Drug | 7        | E   | 6      | -0.112    | -0.581          |
| 2675 | SULFAMERAZINE                          | US Drug | 7        | F   | 6      | -0.463    | -0.416          |
| 2676 | TAMOXIFEN CITRATE                      | US Drug | 7        | G   | 6      | -0.386    | 4.122           |
| 2677 | PREDNISOLONE                           | US Drug | 7        | B   | 7      | 0.689     | 0.102           |
| 2678 | PROMAZINE HYDROCHLORIDE                | US Drug | 7        | C   | 7      | -0.513    | -0.945          |
| 2679 | QUINACRINE HYDROCHLORIDE               | US Drug | 7        | D   | 7      | 0.365     | -0.548          |

SUPPLEMENTARY DATA

|      | Name                           | Library | Plate No | Row | Column | ROS score | viability score |
|------|--------------------------------|---------|----------|-----|--------|-----------|-----------------|
| 2680 | SODIUM SALICYLATE              | US Drug | 7        | E   | 7      | -0.184    | -0.024          |
| 2681 | SULFAMETHAZINE                 | US Drug | 7        | F   | 7      | -0.256    | -0.248          |
| 2682 | TERBUTALINE HEMISULFATE        | US Drug | 7        | G   | 7      | -0.699    | -0.217          |
| 2683 | PREDNISOLONE ACETATE           | US Drug | 7        | B   | 8      | 0.717     | -0.271          |
| 2684 | PROPANTHELINE BROMIDE          | US Drug | 7        | C   | 8      | 0.026     | -0.228          |
| 2685 | QUINIDINE GLUCONATE            | US Drug | 7        | D   | 8      | -0.344    | 1.104           |
| 2686 | SISOMICIN SULFATE              | US Drug | 7        | E   | 8      | -0.241    | -0.078          |
| 2687 | SULFAMETHIZOLE                 | US Drug | 7        | F   | 8      | -0.36     | -0.095          |
| 2688 | TETRACAJNE HYDROCHLORIDE       | US Drug | 7        | G   | 8      | -0.782    | 0.642           |
| 2689 | PREDNISON                      | US Drug | 7        | B   | 9      | -0.501    | 0.185           |
| 2690 | DEXPROPRANOLOL HYDROCHLORIDE   | US Drug | 7        | C   | 9      | 0.067     | -0.148          |
| 2691 | QUININE SULFATE                | US Drug | 7        | D   | 9      | -0.124    | -0.183          |
| 2692 | SPECTINOMYCIN HYDROCHLORIDE    | US Drug | 7        | E   | 9      | -0.088    | -0.554          |
| 2693 | SULFAMETHOXAZOLE               | US Drug | 7        | F   | 9      | -0.381    | -0.373          |
| 2694 | TETRACYCLINE HYDROCHLORIDE     | US Drug | 7        | G   | 9      | -0.767    | -0.058          |
| 2695 | PRIMAQUINE DIPHOSPHATE         | US Drug | 7        | B   | 10     | -0.142    | 0.189           |
| 2696 | PROPYLTHIOURACIL               | US Drug | 7        | C   | 10     | -0.114    | 0.021           |
| 2697 | RACEPHEDRINE HYDROCHLORIDE     | US Drug | 7        | D   | 10     | -0.382    | 0.42            |
| 2698 | SPIRONOLACTONE                 | US Drug | 7        | E   | 10     | -0.095    | 0.178           |
| 2699 | SULFAPYRIDINE                  | US Drug | 7        | F   | 10     | 0.2       | 0.025           |
| 2700 | TETRAHYDROZOLINE HYDROCHLORIDE | US Drug | 7        | G   | 10     | -0.284    | 0.442           |
| 2701 | PRIMIDONE                      | US Drug | 7        | B   | 11     | 0.03      | -0.391          |
| 2702 | PSEUDOPHEDRINE HYDROCHLORIDE   | US Drug | 7        | C   | 11     | 0.245     | -0.518          |
| 2703 | RESERPINE                      | US Drug | 7        | D   | 11     | 0.678     | -0.399          |
| 2704 | STREPTOMYCIN SULFATE           | US Drug | 7        | E   | 11     | 0.592     | 0.11            |
| 2705 | SULFASALAZINE                  | US Drug | 7        | F   | 11     | 0.143     | -0.032          |
| 2706 | THIABENDAZOLE                  | US Drug | 7        | G   | 11     | -0.235    | 0.88            |
| 2707 | TRIPLENNAMINE CITRATE          | US Drug | 8        | B   | 2      | -0.789    | 0.247           |
| 2708 | VIDARABINE                     | US Drug | 8        | C   | 2      | -0.44     | 0.86            |
| 2709 | THEOBROMINE                    | US Drug | 8        | D   | 2      | -0.331    | 1.002           |
| 2710 | OUABAIN                        | US Drug | 8        | E   | 2      | -0.275    | 0.472           |
| 2711 | CEFACLOR                       | US Drug | 8        | F   | 2      | -0.27     | 0.31            |
| 2712 | CANRENOIC ACID, POTASSIUM SALT | US Drug | 8        | G   | 2      | -0.207    | 0.503           |
| 2713 | TRIPROLDINE HYDROCHLORIDE      | US Drug | 8        | B   | 3      | -0.148    | -0.525          |
| 2714 | WARFARIN                       | US Drug | 8        | C   | 3      | -0.024    | -0.503          |
| 2715 | STRYCHNINE                     | US Drug | 8        | D   | 3      | 0.178     | -0.343          |
| 2716 | ALBUTEROL (+/-)                | US Drug | 8        | E   | 3      | 0.397     | -0.43           |
| 2717 | IODIPAMIDE                     | US Drug | 8        | F   | 3      | 0.34      | -0.833          |
| 2718 | CHENODIOL                      | US Drug | 8        | G   | 3      | 0.417     | -0.508          |
| 2719 | TROPICAMIDE                    | US Drug | 8        | B   | 4      | -0.228    | 0.27            |
| 2720 | XYLOMETAZOLINE HYDROCHLORIDE   | US Drug | 8        | C   | 4      | -0.093    | -0.58           |
| 2721 | ACONTIINE                      | US Drug | 8        | D   | 4      | -0.303    | 0.232           |
| 2722 | ARECOLINE HYDROBROMIDE         | US Drug | 8        | E   | 4      | 0.188     | 0.427           |
| 2723 | LIOTHYRONINE                   | US Drug | 8        | F   | 4      | 0.211     | 0.413           |
| 2724 | CHOLECALCIFEROL                | US Drug | 8        | G   | 4      | -0.078    | 0.96            |
| 2725 | TRYPTOPHAN                     | US Drug | 8        | B   | 5      | -0.922    | 0.414           |
| 2726 | ACETARSOL                      | US Drug | 8        | C   | 5      | -0.73     | 0.597           |
| 2727 | YOHIMBINE HYDROCHLORIDE        | US Drug | 8        | D   | 5      | -0.332    | 0.643           |
| 2728 | CAPTOPRIL                      | US Drug | 8        | E   | 5      | 0.043     | 1.124           |
| 2729 | ALLANTOIN                      | US Drug | 8        | F   | 5      | -0.144    | 0.473           |
| 2730 | CINCHONINE                     | US Drug | 8        | G   | 5      | -0.484    | 0.831           |
| 2731 | TUAMINOHEPTANE SULFATE         | US Drug | 8        | B   | 6      | -0.71     | -0.108          |
| 2732 | MERBROMIN                      | US Drug | 8        | C   | 6      | -1.499    | 0.148           |
| 2733 | ADENOSINE PHOSPHATE            | US Drug | 8        | D   | 6      | -0.01     | 0.439           |
| 2734 | CIMETIDINE                     | US Drug | 8        | E   | 6      | -0.525    | 0.435           |
| 2735 | ALTHIAZIDE                     | US Drug | 8        | F   | 6      | -0.418    | 0.573           |
| 2736 | CINCHONINE                     | US Drug | 8        | G   | 6      | -0.617    | 0.087           |
| 2737 | TYROTHRIN                      | US Drug | 8        | B   | 7      | 1.204     | -3.587          |
| 2738 | PHENACETIN                     | US Drug | 8        | C   | 7      | -0.277    | 0.598           |
| 2739 | KETOTIFEN FUMARATE             | US Drug | 8        | D   | 7      | -0.505    | 0.719           |
| 2740 | CLOZAPINE                      | US Drug | 8        | E   | 7      | -0.467    | 0.577           |
| 2741 | ADENINE                        | US Drug | 8        | F   | 7      | -0.874    | 0.484           |
| 2742 | COENZYME B12                   | US Drug | 8        | G   | 7      | -0.432    | 0.51            |
| 2743 | UREA                           | US Drug | 8        | B   | 8      | -0.185    | -0.283          |
| 2744 | PHENYLMERCURIC ACETATE         | US Drug | 8        | C   | 8      | 2.667     | -5.778          |
| 2745 | BETAHISTINE HYDROCHLORIDE      | US Drug | 8        | D   | 8      | 0.01      | -0.088          |
| 2746 | HYDRASTINE (1R, 9S)            | US Drug | 8        | E   | 8      | -0.052    | -0.03           |
| 2747 | AMINACRINE                     | US Drug | 8        | F   | 8      | 0.348     | -0.337          |
| 2748 | CHOLESTEROL                    | US Drug | 8        | G   | 8      | 0.063     | -0.05           |
| 2749 | URSODIOL                       | US Drug | 8        | B   | 9      | -0.83     | -0.158          |
| 2750 | SULFANILAMIDE                  | US Drug | 8        | C   | 9      | -0.272    | -0.149          |
| 2751 | MOLSIDOMINE                    | US Drug | 8        | D   | 9      | -0.053    | -0.117          |
| 2752 | LIDOCAINE HYDROCHLORIDE        | US Drug | 8        | E   | 9      | -0.384    | 0.417           |
| 2753 | BEKANAMYCIN SULFATE            | US Drug | 8        | F   | 9      | -0.134    | 0.435           |
| 2754 | PIPERINE                       | US Drug | 8        | G   | 9      | -0.314    | 0.025           |
| 2755 | VALPROATE SODIUM               | US Drug | 8        | B   | 10     | -0.266    | -0.151          |
| 2756 | AZELAIC ACID                   | US Drug | 8        | C   | 10     | -0.05     | -0.187          |
| 2757 | MYCOPHENOLIC ACID              | US Drug | 8        | D   | 10     | 0.184     | -0.755          |
| 2758 | PHENTOLAMINE HYDROCHLORIDE     | US Drug | 8        | E   | 10     | -0.379    | 0.21            |
| 2759 | BUDESONIDE                     | US Drug | 8        | F   | 10     | 1.069     | 0.227           |
| 2760 | ETOPOSIDE                      | US Drug | 8        | G   | 10     | 0.33      | -0.217          |
| 2761 | VANCOMYCIN HYDROCHLORIDE       | US Drug | 8        | B   | 11     | -0.456    | -0.109          |
| 2762 | PHENETHICILLIN POTASSIUM       | US Drug | 8        | C   | 11     | -0.399    | -0.077          |
| 2763 | OLEANDROMYCIN PHOSPHATE        | US Drug | 8        | D   | 11     | 0.053     | -0.016          |
| 2764 | BUTAMBEIN                      | US Drug | 8        | E   | 11     | 0.189     | -0.289          |
| 2765 | BRUCINE                        | US Drug | 8        | F   | 11     | -0.29     | 0.043           |
| 2766 | DEHYDROCHOLIC ACID             | US Drug | 8        | G   | 11     | -0.184    | 0.279           |
| 2767 | MESNA                          | US Drug | 9        | B   | 2      | -0.833    | 1.121           |
| 2768 | CARBOPLATIN                    | US Drug | 9        | C   | 2      | -0.563    | 0.514           |
| 2769 | CYCLOSPORINE                   | US Drug | 9        | D   | 2      | -0.871    | 0.473           |
| 2770 | BIOTIN                         | US Drug | 9        | E   | 2      | 0.032     | 0.91            |
| 2771 | AMIPRILOSE                     | US Drug | 9        | F   | 2      | -0.379    | 0.227           |
| 2772 | TRAZODONE HYDROCHLORIDE        | US Drug | 9        | G   | 2      | -0.692    | 0.701           |
| 2773 | TRETINON                       | US Drug | 9        | B   | 3      | 1.341     | 0.222           |
| 2774 | CISPLATIN                      | US Drug | 9        | C   | 3      | 0.018     | 0.177           |
| 2775 | ASCORBIC ACID                  | US Drug | 9        | D   | 3      | -0.753    | -0.185          |
| 2776 | AKLOMIDE                       | US Drug | 9        | E   | 3      | -0.486    | 0.439           |
| 2777 | TIAPRIDE HYDROCHLORIDE         | US Drug | 9        | F   | 3      | -0.3      | 0.623           |
| 2778 | MENTHOL(-)                     | US Drug | 9        | G   | 3      | -0.865    | 0.999           |
| 2779 | BRETYLIUM TOSYLATE             | US Drug | 9        | B   | 4      | -0.225    | 0.799           |
| 2780 | ZIDOVUDINE (AZT)               | US Drug | 9        | C   | 4      | 0.01      | 0.584           |
| 2781 | MENADIONE                      | US Drug | 9        | D   | 4      | -0.327    | 0.954           |
| 2782 | NICOTINYL ALCOHOL TARTRATE     | US Drug | 9        | E   | 4      | -0.346    | 0.882           |
| 2783 | BACAMPICILLIN HYDROCHLORIDE    | US Drug | 9        | F   | 4      | -0.067    | 0.28            |
| 2784 | THONZYLAMINE HYDROCHLORIDE     | US Drug | 9        | G   | 4      | -0.224    | 0.774           |



SUPPLEMENTARY DATA

|      | Name                                  | Library | Plate No | Row | Column | ROS score | viability score |
|------|---------------------------------------|---------|----------|-----|--------|-----------|-----------------|
| 2785 | FOSCARNET SODIUM                      | US Drug | 9        | B   | 5      | -0.138    | -0.072          |
| 2786 | AZACITIDINE                           | US Drug | 9        | C   | 5      | 0.354     | -2.095          |
| 2787 | SALICIN                               | US Drug | 9        | D   | 5      | -0.824    | 0.371           |
| 2788 | FLOXURIDINE                           | US Drug | 9        | E   | 5      | 0.309     | -0.079          |
| 2789 | BENDROFLUMETHIAZIDE                   | US Drug | 9        | F   | 5      | -0.133    | 0.27            |
| 2790 | THIAMPHENICOL                         | US Drug | 9        | G   | 5      | -0.342    | 0.074           |
| 2791 | CEFSULODIN SODIUM                     | US Drug | 9        | B   | 6      | -0.287    | 0.549           |
| 2792 | CYCLOHEXIMIDE                         | US Drug | 9        | C   | 6      | 1.212     | -1.977          |
| 2793 | MONENSIN SODIUM (monensin A is shown) | US Drug | 9        | D   | 6      | 2.84      | -4.112          |
| 2794 | ALTRETAMINE                           | US Drug | 9        | E   | 6      | -0.714    | 1.035           |
| 2795 | BEPRIDIL HYDROCHLORIDE                | US Drug | 9        | F   | 6      | -0.709    | 1.214           |
| 2796 | TENOXCAM                              | US Drug | 9        | G   | 6      | -0.845    | 1.133           |
| 2797 | FOSFOMYCIN CALCIUM                    | US Drug | 9        | B   | 7      | -0.732    | 0.199           |
| 2798 | TINIDAZOLE                            | US Drug | 9        | C   | 7      | -0.204    | 0.217           |
| 2799 | ABAMECTIN                             | US Drug | 9        | D   | 7      | 2.498     | -3.948          |
| 2800 | AMINOHIPURIC ACID                     | US Drug | 9        | E   | 7      | -0.228    | 0.762           |
| 2801 | BROMHEXINE HYDROCHLORIDE              | US Drug | 9        | F   | 7      | -0.536    | 0.372           |
| 2802 | CHLOROXINE                            | US Drug | 9        | G   | 7      | -0.898    | -0.063          |
| 2803 | CEFAMANDOLE NAFATE                    | US Drug | 9        | B   | 8      | -0.44     | 0.027           |
| 2804 | CARBIDOPA                             | US Drug | 9        | C   | 8      | -0.39     | -0.311          |
| 2805 | BENZOIC ACID                          | US Drug | 9        | D   | 8      | -0.535    | 0.624           |
| 2806 | MEFLOQUINE                            | US Drug | 9        | E   | 8      | -0.507    | -0.228          |
| 2807 | CARMUSTINE                            | US Drug | 9        | F   | 8      | -0.445    | 0.452           |
| 2808 | CHLORPROTHIXENE HYDROCHLORIDE         | US Drug | 9        | G   | 8      | 0.015     | -0.514          |
| 2809 | LIOthyRONINE (L-isomer) SODIUM        | US Drug | 9        | B   | 9      | -0.183    | 0.443           |
| 2810 | ETHOSUXIMIDE                          | US Drug | 9        | C   | 9      | -0.096    | -0.065          |
| 2811 | BENZYL BENZOATE                       | US Drug | 9        | D   | 9      | -0.314    | -0.09           |
| 2812 | ADIPHENINE HYDROCHLORIDE              | US Drug | 9        | E   | 9      | -0.465    | 0.046           |
| 2813 | CEF TRIAXONE SODIUM TRIHYDRATE        | US Drug | 9        | F   | 9      | -0.839    | 0.809           |
| 2814 | CINNARAZINE                           | US Drug | 9        | G   | 9      | -0.255    | 0.202           |
| 2815 | ALRESTATIN                            | US Drug | 9        | B   | 10     | -0.485    | -0.239          |
| 2816 | PIPERIDOLATE HYDROCHLORIDE            | US Drug | 9        | C   | 10     | 0.106     | -0.438          |
| 2817 | BENZOYL PEROXIDE                      | US Drug | 9        | D   | 10     | -0.187    | -0.597          |
| 2818 | QUINAPRIL HYDROCHLORIDE               | US Drug | 9        | E   | 10     | -0.02     | -0.539          |
| 2819 | TRIMPRAMINE MALEATE                   | US Drug | 9        | F   | 10     | -0.114    | -0.287          |
| 2820 | DANTROLENE SODIUM                     | US Drug | 9        | G   | 10     | -0.18     | 0.052           |
| 2821 | PROADIFEN HYDROCHLORIDE               | US Drug | 9        | B   | 11     | 0.13      | -1.635          |
| 2822 | ANISINDIONE                           | US Drug | 9        | C   | 11     | 0.057     | -0.51           |
| 2823 | BETAINE HYDROCHLORIDE                 | US Drug | 9        | D   | 11     | 0.134     | -0.239          |
| 2824 | AMIFOSTINE                            | US Drug | 9        | E   | 11     | -0.345    | -0.212          |
| 2825 | TRIFLUPROMAZINE HYDROCHLORIDE         | US Drug | 9        | F   | 11     | 0.118     | -0.233          |
| 2826 | BETAMETHASONE 17,21-DIPROPIONATE      | US Drug | 9        | G   | 11     | 0.445     | -0.192          |
| 2827 | AMSACRINE                             | US Drug | 10       | B   | 2      | -0.635    | 0.062           |
| 2828 | ROXITHROMYCIN                         | US Drug | 10       | C   | 2      | -0.805    | 1.093           |
| 2829 | OXIBENDAZOLE                          | US Drug | 10       | D   | 2      | -0.151    | -1.198          |
| 2830 | NIMODIPINE                            | US Drug | 10       | E   | 2      | 0.226     | 1.134           |
| 2831 | TERFENADINE                           | US Drug | 10       | F   | 2      | -0.137    | 0.583           |
| 2832 | PACLITAXEL                            | US Drug | 10       | G   | 2      | -0.654    | -1.208          |
| 2833 | MIDODRINE HYDROCHLORIDE               | US Drug | 10       | B   | 3      | -1.451    | 0.599           |
| 2834 | MITOXANTHRONE HYDROCHLORIDE           | US Drug | 10       | C   | 3      | -0.652    | -0.862          |
| 2835 | PIPOBROMAN                            | US Drug | 10       | D   | 3      | -0.037    | 0.855           |
| 2836 | ACYCLOVIR                             | US Drug | 10       | E   | 3      | -0.118    | 1.114           |
| 2837 | CLOPIDOGREL SULFATE                   | US Drug | 10       | F   | 3      | -0.79     | 0.78            |
| 2838 | BUTACAINE                             | US Drug | 10       | G   | 3      | -0.332    | 0.578           |
| 2839 | NADOLOL                               | US Drug | 10       | B   | 4      | -0.962    | 0.893           |
| 2840 | OXETHAZAINE                           | US Drug | 10       | C   | 4      | 0.362     | 0.071           |
| 2841 | ETANIDAZOLE                           | US Drug | 10       | D   | 4      | -0.232    | 0.143           |
| 2842 | RETINYL PALMITATE                     | US Drug | 10       | E   | 4      | 0.408     | 0.114           |
| 2843 | LORATADINE                            | US Drug | 10       | F   | 4      | 0.846     | 0.297           |
| 2844 | CLOBETASOL PROPIONATE                 | US Drug | 10       | G   | 4      | 0.756     | -0.521          |
| 2845 | NALTREXONE HYDROCHLORIDE              | US Drug | 10       | B   | 5      | -0.756    | 0.174           |
| 2846 | DIPYRONE                              | US Drug | 10       | C   | 5      | 0.715     | 0.808           |
| 2847 | NAFRONYL OXALATE                      | US Drug | 10       | D   | 5      | -0.338    | 0.128           |
| 2848 | THALIDOMIDE                           | US Drug | 10       | E   | 5      | -0.36     | 0.337           |
| 2849 | SELAMECTIN                            | US Drug | 10       | F   | 5      | 0.816     | 0.198           |
| 2850 | IOPANIC ACID                          | US Drug | 10       | G   | 5      | 0.702     | 0.501           |
| 2851 | CYCLOTHIAZIDE                         | US Drug | 10       | B   | 6      | 0.753     | 0.309           |
| 2852 | SULFANILATE ZINC                      | US Drug | 10       | C   | 6      | -0.097    | 0.212           |
| 2853 | QUIPAZINE MALEATE                     | US Drug | 10       | D   | 6      | -0.043    | 0.395           |
| 2854 | NITRENDIPINE                          | US Drug | 10       | E   | 6      | 0.486     | 0.054           |
| 2855 | NAPROXOL                              | US Drug | 10       | F   | 6      | 0.493     | 0.55            |
| 2856 | KETOROLAC TROMETHAMINE                | US Drug | 10       | G   | 6      | -0.313    | 0.378           |
| 2857 | NICLOSAMIDE                           | US Drug | 10       | B   | 7      | 2.186     | -5.017          |
| 2858 | URETHANE                              | US Drug | 10       | C   | 7      | 0.838     | 0.051           |
| 2859 | RTANSERIN                             | US Drug | 10       | D   | 7      | -0.983    | -0.114          |
| 2860 | BENZALKONIUM CHLORIDE                 | US Drug | 10       | E   | 7      | 1.982     | -4.038          |
| 2861 | COLFORSIN                             | US Drug | 10       | F   | 7      | -0.118    | 0.564           |
| 2862 | LANSOPRAZOLE                          | US Drug | 10       | G   | 7      | -1.013    | 0.277           |
| 2863 | NOMIFENSINE MALEATE                   | US Drug | 10       | B   | 8      | -1.866    | 0.044           |
| 2864 | THRAM                                 | US Drug | 10       | C   | 8      | -0.061    | 0.111           |
| 2865 | SEMUSTINE                             | US Drug | 10       | D   | 8      | -0.226    | -0.302          |
| 2866 | CIPROFLOXACIN                         | US Drug | 10       | E   | 8      | 0.289     | -0.192          |
| 2867 | ISOSORBIDE MONONITRATE                | US Drug | 10       | F   | 8      | 0.576     | 0.493           |
| 2868 | MEXILETINE HYDROCHLORIDE              | US Drug | 10       | G   | 8      | -0.783    | 0.599           |
| 2869 | PERGOLIDE MESYLATE                    | US Drug | 10       | B   | 9      | 0.005     | 0.082           |
| 2870 | THIOTEPA                              | US Drug | 10       | C   | 9      | 0.944     | -0.071          |
| 2871 | SPIRAMYCIN                            | US Drug | 10       | D   | 9      | -0.259    | -0.081          |
| 2872 | CELECOXIB                             | US Drug | 10       | E   | 9      | 0.195     | 0.544           |
| 2873 | AMCINONIDE                            | US Drug | 10       | F   | 9      | 0.899     | 0.128           |
| 2874 | MORANTEL CITRATE                      | US Drug | 10       | G   | 9      | -1.046    | 0.348           |
| 2875 | PRILOCAINE HYDROCHLORIDE              | US Drug | 10       | B   | 10     | 0.586     | 0.344           |
| 2876 | TETROQUINONE                          | US Drug | 10       | C   | 10     | 0.418     | 0.258           |
| 2877 | CLOFIBRATE                            | US Drug | 10       | D   | 10     | -0.111    | 0.184           |
| 2878 | AZITHROMYCIN                          | US Drug | 10       | E   | 10     | 0.755     | 0.482           |
| 2879 | BUPIVACAINE HYDROCHLORIDE             | US Drug | 10       | F   | 10     | 0.291     | 0.125           |
| 2880 | PERPHENAZINE                          | US Drug | 10       | G   | 10     | 0.006     | -0.146          |
| 2881 | HYDROCORTISONE BUTYRATE               | US Drug | 10       | B   | 11     | -1.04     | -1.347          |
| 2882 | SULFANITRAN                           | US Drug | 10       | C   | 11     | 0.495     | -0.236          |
| 2883 | RESORCINOL MONOACETATE                | US Drug | 10       | D   | 11     | 0.32      | -0.93           |
| 2884 | ANETHOLE                              | US Drug | 10       | E   | 11     | -0.859    | 0.073           |
| 2885 | ALBENDAZOLE                           | US Drug | 10       | F   | 11     | 0.246     | -0.104          |
| 2886 | RIBAVIRIN                             | US Drug | 10       | G   | 11     | -0.948    | -0.491          |
| 2887 | ROFECOXIB                             | US Drug | 11       | B   | 2      | -0.586    | 0.343           |
| 2888 | ORLISTAT                              | US Drug | 11       | C   | 2      | 0.15      | 0.495           |
| 2889 | ESTROPIPATE                           | US Drug | 11       | D   | 2      | -0.237    | 0.409           |

SUPPLEMENTARY DATA

|      | Name                                | Library | Plate No | Row | Column | ROS score | viability score |
|------|-------------------------------------|---------|----------|-----|--------|-----------|-----------------|
| 2890 | EZETIMIBE                           | US Drug | 11       | E   | 2      | -0.089    | -0.181          |
| 2891 | CILOSTAZOL                          | US Drug | 11       | F   | 2      | -0.187    | 0.822           |
| 2892 | CHLOROPHYLLIDE Cu COMPLEX Na SALT   | US Drug | 11       | G   | 2      | -0.518    | 0.741           |
| 2893 | SIMVASTATIN                         | US Drug | 11       | B   | 3      | 1.615     | -4.601          |
| 2894 | MOXIFLOXACIN HYDROCHLORIDE          | US Drug | 11       | C   | 3      | -0.348    | 0.109           |
| 2895 | CLAVULANATE LITHIUM                 | US Drug | 11       | D   | 3      | -0.09     | 0.243           |
| 2896 | OLMESARTAN MEDOXOMIL                | US Drug | 11       | E   | 3      | 0.505     | 0.354           |
| 2897 | CTICOLINE                           | US Drug | 11       | F   | 3      | 0.141     | 0.252           |
| 2898 | BIFONAZOLE                          | US Drug | 11       | G   | 3      | -0.657    | 0.587           |
| 2899 | OXCARBAZEPINE                       | US Drug | 11       | B   | 4      | 0.127     | 0.415           |
| 2900 | PIOGLITAZONE HYDROCHLORIDE          | US Drug | 11       | C   | 4      | 0.682     | 0.519           |
| 2901 | ALCLOMETAZONE DIPROPIONATE          | US Drug | 11       | D   | 4      | 0.144     | 0.373           |
| 2902 | CEFTIBUTEN                          | US Drug | 11       | E   | 4      | 0.019     | 0.272           |
| 2903 | APRAMYGIN                           | US Drug | 11       | F   | 4      | -0.79     | 0.083           |
| 2904 | TYLOSIN TARTRATE                    | US Drug | 11       | G   | 4      | -1.148    | 0.559           |
| 2905 | MELOXICAM SODIUM                    | US Drug | 11       | B   | 5      | -0.551    | 0.448           |
| 2906 | DONEPEZIL HYDROCHLORIDE             | US Drug | 11       | C   | 5      | -0.142    | 0.082           |
| 2907 | ALENDRONATE SODIUM                  | US Drug | 11       | D   | 5      | 0.424     | 0.188           |
| 2908 | CEFDINIR                            | US Drug | 11       | E   | 5      | 0.377     | 0.375           |
| 2909 | SERTRALINE HYDROCHLORIDE            | US Drug | 11       | F   | 5      | -0.487    | 0.048           |
| 2910 | SARAFLOXACIN HYDROCHLORIDE          | US Drug | 11       | G   | 5      | -0.084    | 0.518           |
| 2911 | CARVEDILOL                          | US Drug | 11       | B   | 6      | -0.709    | 0.275           |
| 2912 | FLUVASTATIN                         | US Drug | 11       | C   | 6      | 3.292     | -4.88           |
| 2913 | ACARBOSE                            | US Drug | 11       | D   | 6      | -0.389    | 0.645           |
| 2914 | SIBUTRAMINE HYDROCHLORIDE           | US Drug | 11       | E   | 6      | -0.424    | 0.505           |
| 2915 | ALFLUZOSIN                          | US Drug | 11       | F   | 6      | -0.042    | 0.858           |
| 2916 | CLOPIDOL                            | US Drug | 11       | G   | 6      | -0.832    | 0.782           |
| 2917 | IRBESARTAN                          | US Drug | 11       | B   | 7      | 0.331     | 0.789           |
| 2918 | PIZOTYLIN MALATE                    | US Drug | 11       | C   | 7      | -1.133    | 0.378           |
| 2919 | ROPINIROLE                          | US Drug | 11       | D   | 7      | -0.204    | 0.497           |
| 2920 | PERINDOPRIL ERBUMINE                | US Drug | 11       | E   | 7      | 0.445     | -0.045          |
| 2921 | TELITHROMYCIN                       | US Drug | 11       | F   | 7      | -0.3      | 0.578           |
| 2922 | CHLORMADINONE ACETATE               | US Drug | 11       | G   | 7      | -0.281    | 0.384           |
| 2923 | LEVOFLOXACIN                        | US Drug | 11       | B   | 8      | -0.238    | -0.059          |
| 2924 | EXEMESTANE                          | US Drug | 11       | C   | 8      | -0.771    | 0.111           |
| 2925 | QUETIAPINE                          | US Drug | 11       | D   | 8      | 0.25      | 0.483           |
| 2926 | ROSUVASTATIN CALCIUM                | US Drug | 11       | E   | 8      | 0.177     | -2.811          |
| 2927 | OXAPROZIN                           | US Drug | 11       | F   | 8      | 0.248     | 0.232           |
| 2928 | OXICONAZOLE NITRATE                 | US Drug | 11       | G   | 8      | -0.62     | 0.418           |
| 2929 | LITHIUM CITRATE                     | US Drug | 11       | B   | 9      | 0.304     | 0.135           |
| 2930 | TILMICO SIN                         | US Drug | 11       | C   | 9      | -0.254    | -0.392          |
| 2931 | RIZATRIPTAN BENZOATE                | US Drug | 11       | D   | 9      | -0.159    | -0.289          |
| 2932 | RAMIPRIL                            | US Drug | 11       | E   | 9      | 0.447     | 0.054           |
| 2933 | OXFENDAZOLE                         | US Drug | 11       | F   | 9      | 0.682     | -0.013          |
| 2934 | AZAPERONE                           | US Drug | 11       | G   | 9      | -0.813    | 0.039           |
| 2935 | GATIFLOXACIN                        | US Drug | 11       | B   | 10     | -0.303    | 0.158           |
| 2936 | FLUMOXIN MEGLUMINE                  | US Drug | 11       | C   | 10     | 0.822     | -0.121          |
| 2937 | FAMCICLOVIR                         | US Drug | 11       | D   | 10     | 0.814     | -0.568          |
| 2938 | ESCITALOPRAM OXALATE                | US Drug | 11       | E   | 10     | 0.047     | -0.218          |
| 2939 | AMITRAZ                             | US Drug | 11       | F   | 10     | -0.213    | 0.149           |
| 2940 | TRANILAST                           | US Drug | 11       | G   | 10     | -1.478    | 0.52            |
| 2941 | MIGLITOL                            | US Drug | 11       | B   | 11     | -1.245    | -0.002          |
| 2942 | CLORSULON                           | US Drug | 11       | C   | 11     | 0.014     | -0.241          |
| 2943 | AMLODIPINE BESYLATE                 | US Drug | 11       | D   | 11     | 0.781     | -0.138          |
| 2944 | DERACOXIB                           | US Drug | 11       | E   | 11     | -0.308    | -0.604          |
| 2945 | PEFLOXACINE MESYLATE                | US Drug | 11       | F   | 11     | 0.224     | -0.4            |
| 2946 | AZELASTINE HYDROCHLORIDE            | US Drug | 11       | G   | 11     | -0.42     | -0.581          |
| 2947 | D-LACTIOL MONOHYDRATE               | US Drug | 12       | B   | 2      | -0.385    | -0.208          |
| 2948 | SULFISOXAZOLE ACETYL                | US Drug | 12       | C   | 2      | -0.483    | -0.302          |
| 2949 | NETILMICIN SULFATE                  | US Drug | 12       | D   | 2      | -1.572    | 0.579           |
| 2950 | NORGESTIMATE                        | US Drug | 12       | E   | 2      | -0.318    | -0.607          |
| 2951 | AMINOPENTAMIDE                      | US Drug | 12       | F   | 2      | -0.874    | 0.176           |
| 2952 | ROLIPRAM                            | US Drug | 12       | G   | 2      | -0.532    | 0.238           |
| 2953 | LEVOCARNITINE                       | US Drug | 12       | B   | 3      | -0.241    | -0.189          |
| 2954 | TAURINE                             | US Drug | 12       | C   | 3      | 0.408     | -0.247          |
| 2955 | DOXORUBICIN                         | US Drug | 12       | D   | 3      | 2.988     | -5.61           |
| 2956 | TERAZOSIN HYDROCHLORIDE             | US Drug | 12       | E   | 3      | 0.859     | -0.095          |
| 2957 | ARSANILIC ACID                      | US Drug | 12       | F   | 3      | 0.23      | 0.214           |
| 2958 | ROLITETRACYCLINE                    | US Drug | 12       | G   | 3      | -0.227    | 0.411           |
| 2959 | LOBENDAZOLE                         | US Drug | 12       | B   | 4      | 0.071     | 0.272           |
| 2960 | THIAMINE                            | US Drug | 12       | C   | 4      | 0.018     | -0.043          |
| 2961 | METHYSERGIDE MALEATE                | US Drug | 12       | D   | 4      | 0.647     | 0.299           |
| 2962 | TIOCONAZOLE                         | US Drug | 12       | E   | 4      | 0.103     | 0.275           |
| 2963 | PANTHENOL                           | US Drug | 12       | F   | 4      | 0.684     | 0.352           |
| 2964 | PIPAMPERONE                         | US Drug | 12       | G   | 4      | -0.384    | 0.757           |
| 2965 | METHYLENE BLUE                      | US Drug | 12       | B   | 5      | 0.624     | -2.375          |
| 2966 | TRICLOSAN                           | US Drug | 12       | C   | 5      | 0.107     | 0.308           |
| 2967 | SOLIFENACIN SUCCINATE               | US Drug | 12       | D   | 5      | 0.339     | -0.152          |
| 2968 | ERGOTAMINE TARTRATE                 | US Drug | 12       | E   | 5      | 0.789     | 0.963           |
| 2969 | PENTERMINE                          | US Drug | 12       | F   | 5      | -0.093    | -0.397          |
| 2970 | PANCURONIUM BROMIDE                 | US Drug | 12       | G   | 5      | -0.634    | 0.251           |
| 2971 | METHYLATROPINE NITRATE              | US Drug | 12       | B   | 6      | 0.295     | 0.349           |
| 2972 | TRIMETHADIONE                       | US Drug | 12       | C   | 6      | -0.309    | 0.299           |
| 2973 | ACEPROMAZINE MALEATE                | US Drug | 12       | D   | 6      | 0.032     | 0.484           |
| 2974 | ANAGRELIDE HYDROCHLORIDE            | US Drug | 12       | E   | 6      | -0.38     | -0.014          |
| 2975 | TRIENTINE HYDROCHLORIDE             | US Drug | 12       | F   | 6      | 0.383     | 0.511           |
| 2976 | FUMAZENIL                           | US Drug | 12       | G   | 6      | 0.005     | 0.536           |
| 2977 | NITHIAMIDE                          | US Drug | 12       | B   | 7      | -0.388    | 0.187           |
| 2978 | ZINC UNDECYLENATE                   | US Drug | 12       | C   | 7      | -0.424    | 0.18            |
| 2979 | BIPERIDEN                           | US Drug | 12       | D   | 7      | -0.662    | 1.143           |
| 2980 | ETOMIDATE                           | US Drug | 12       | E   | 7      | -0.625    | -0.008          |
| 2981 | TICLOPIDINE HYDROCHLORIDE           | US Drug | 12       | F   | 7      | -0.565    | 0.104           |
| 2982 | ALTRENOGEST                         | US Drug | 12       | G   | 7      | 0.205     | -0.487          |
| 2983 | PRALIDOXIME CHLORIDE                | US Drug | 12       | B   | 8      | 0.298     | -0.082          |
| 2984 | UNDECYLENIC ACID                    | US Drug | 12       | C   | 8      | -0.799    | -0.018          |
| 2985 | DEXCHLORPHENIRAMINE MALEATE         | US Drug | 12       | D   | 8      | -0.025    | 0               |
| 2986 | LAMOTRIGINE                         | US Drug | 12       | E   | 8      | 0.188     | -0.445          |
| 2987 | TICARCILLIN DISODIUM                | US Drug | 12       | F   | 8      | -0.273    | -0.025          |
| 2988 | BISOPROLOL FUMARATE                 | US Drug | 12       | G   | 8      | -0.528    | 0.027           |
| 2989 | PREDNISOLONE HEMISUCCINATE          | US Drug | 12       | B   | 9      | 0.318     | -0.098          |
| 2990 | CLINDAMYCIN PALMITATE HYDROCHLORIDE | US Drug | 12       | C   | 9      | -0.306    | 0.153           |
| 2991 | DILOXANIDE FUROATE                  | US Drug | 12       | D   | 9      | -0.186    | 0.35            |
| 2992 | RALOXIFENE HYDROCHLORIDE            | US Drug | 12       | E   | 9      | 0.415     | -0.411          |
| 2993 | TETRAMIZOLE HYDROCHLORIDE           | US Drug | 12       | F   | 9      | 0.447     | 0.126           |
| 2994 | FLUDARABINE PHOSPHATE               | US Drug | 12       | G   | 9      | -0.683    | 0.276           |

SUPPLEMENTARY DATA

|      | Name                          | Library | Plate No | Row | Column | ROS score | viability score |
|------|-------------------------------|---------|----------|-----|--------|-----------|-----------------|
| 2995 | PYRIDOXINE                    | US Drug | 12       | B   | 10     | -0.18     | -0.004          |
| 2996 | CEFONICID SODIUM              | US Drug | 12       | C   | 10     | -0.033    | -0.38           |
| 2997 | ETIDRONATE DISODIUM           | US Drug | 12       | D   | 10     | 0.253     | 0.141           |
| 2998 | CEFPODOXIME PROXETIL          | US Drug | 12       | E   | 10     | 0.278     | -0.184          |
| 2999 | TOLTRAZURIL                   | US Drug | 12       | F   | 10     | 0.45      | -0.254          |
| 3000 | MUPIROCIIN                    | US Drug | 12       | G   | 10     | -0.181    | 0.381           |
| 3001 | RIMANTADINE HYDROCHLORIDE     | US Drug | 12       | B   | 11     | -1.554    | -0.115          |
| 3002 | IFOSFAMIDE                    | US Drug | 12       | C   | 11     | 0.141     | -0.387          |
| 3003 | NATAMYCIN                     | US Drug | 12       | D   | 11     | -0.064    | 0.089           |
| 3004 | TADALAFIL                     | US Drug | 12       | E   | 11     | 0.808     | -0.74           |
| 3005 | TOREMIPHENE CITRATE           | US Drug | 12       | F   | 11     | -0.647    | 3.75            |
| 3006 | TEICOPLANIN [A(2-1) shown]    | US Drug | 12       | G   | 11     | -0.087    | -0.273          |
| 3007 | GLYCOPYRROLATE                | US Drug | 13       | B   | 2      | -0.868    | 1.107           |
| 3008 | METHYLPHENIDATE HYDROCHLORIDE | US Drug | 13       | C   | 2      | -0.177    | 0.835           |
| 3009 | CLOFAZIMINE                   | US Drug | 13       | D   | 2      | 0.481     | -0.07           |
| 3010 | DENATONIUM BENZOATE           | US Drug | 13       | E   | 2      | -0.232    | 0.489           |
| 3011 | ALPRENOLOL                    | US Drug | 13       | F   | 2      | -0.489    | 0.387           |
| 3012 | PENTYLENETETRAZOL             | US Drug | 13       | G   | 2      | -0.185    | 0.66            |
| 3013 | ITRACONAZOLE                  | US Drug | 13       | B   | 3      | 0.666     | -0.117          |
| 3014 | RABEPRAZOLE SODIUM            | US Drug | 13       | C   | 3      | -0.225    | 0.589           |
| 3015 | BENZYLAMINE HYDROCHLORIDE     | US Drug | 13       | D   | 3      | -0.136    | 0.341           |
| 3016 | MESALAMINE                    | US Drug | 13       | E   | 3      | 0.288     | -0.219          |
| 3017 | AMIODARONE HYDROCHLORIDE      | US Drug | 13       | F   | 3      | 0.41      | -0.858          |
| 3018 | NICOTINE DITARTRATE           | US Drug | 13       | G   | 3      | -0.484    | 0.374           |
| 3019 | OCTISALATE                    | US Drug | 13       | B   | 4      | -1.04     | 0.39            |
| 3020 | RISEDRONATE SODIUM HYDRATE    | US Drug | 13       | C   | 4      | -0.154    | 0.677           |
| 3021 | DOXAZOSIN MESYLATE            | US Drug | 13       | D   | 4      | -0.521    | 0.408           |
| 3022 | ETHAMIVAN                     | US Drug | 13       | E   | 4      | -0.039    | -0.238          |
| 3023 | BUSPIRONE HYDROCHLORIDE       | US Drug | 13       | F   | 4      | -0.222    | -0.242          |
| 3024 | TACRINE HYDROCHLORIDE         | US Drug | 13       | G   | 4      | 0.347     | 0.618           |
| 3025 | RIBOFLAVIN 5-PHOSPHATE SODIUM | US Drug | 13       | B   | 5      | -0.324    | 0.542           |
| 3026 | SUCRALOSE                     | US Drug | 13       | C   | 5      | 0.474     | 0.903           |
| 3027 | ISOETHARINE MESYLATE          | US Drug | 13       | D   | 5      | 0.053     | 0.333           |
| 3028 | AZITREONAM                    | US Drug | 13       | E   | 5      | 0.088     | -0.34           |
| 3029 | LOXAPINE SUCCINATE            | US Drug | 13       | F   | 5      | 0.032     | -0.455          |
| 3030 | DIMERCAPROL                   | US Drug | 13       | G   | 5      | -0.43     | 0.66            |
| 3031 | SELEGILINE HYDROCHLORIDE      | US Drug | 13       | B   | 6      | -0.523    | 0.539           |
| 3032 | COLISTIN SULFATE              | US Drug | 13       | C   | 6      | -0.093    | 0.028           |
| 3033 | FLORFENICOL                   | US Drug | 13       | D   | 6      | -0.286    | 0.18            |
| 3034 | TYLOXAPOL                     | US Drug | 13       | E   | 6      | -0.82     | 0.038           |
| 3035 | DIAZOXIDE                     | US Drug | 13       | F   | 6      | 0.547     | 0.036           |
| 3036 | METOLAZONE                    | US Drug | 13       | G   | 6      | 0.098     | 0.408           |
| 3037 | CEFTAZIDIME                   | US Drug | 13       | B   | 7      | -0.701    | 0.65            |
| 3038 | ARSENIC TRIOXIDE              | US Drug | 13       | C   | 7      | -0.337    | -0.481          |
| 3039 | ETHYNODIOL DIACETATE          | US Drug | 13       | D   | 7      | -0.083    | 0.098           |
| 3040 | THIAMYLAL SODIUM              | US Drug | 13       | E   | 7      | 0.376     | 0.084           |
| 3041 | DILTIAZEM HYDROCHLORIDE       | US Drug | 13       | F   | 7      | 0.242     | 0.141           |
| 3042 | AMOXAPINE                     | US Drug | 13       | G   | 7      | 1.139     | -0.458          |
| 3043 | GABAPENTIN                    | US Drug | 13       | B   | 8      | -1.092    | 0.279           |
| 3044 | CLONAZEPAM                    | US Drug | 13       | C   | 8      | -0.587    | 0.104           |
| 3045 | ORNIDAZOLE                    | US Drug | 13       | D   | 8      | -0.4      | 0.012           |
| 3046 | CHLORDIAZEPOXIDE              | US Drug | 13       | E   | 8      | 0.048     | -0.562          |
| 3047 | GLYBURIDE                     | US Drug | 13       | F   | 8      | -0.045    | 0.132           |
| 3048 | BUTYL PARABEN                 | US Drug | 13       | G   | 8      | -0.358    | 0.026           |
| 3049 | ELETRIPTAN HYDROBROMIDE       | US Drug | 13       | B   | 9      | -0.1      | 0.581           |
| 3050 | BENZBROMARONE                 | US Drug | 13       | C   | 9      | 0.396     | 0.46            |
| 3051 | OXANTEL PAMOATE               | US Drug | 13       | D   | 9      | -0.236    | 0.342           |
| 3052 | ASTEMIZOLE                    | US Drug | 13       | E   | 9      | 3.559     | -8.807          |
| 3053 | MIANSERIN HYDROCHLORIDE       | US Drug | 13       | F   | 9      | -0.361    | -0.737          |
| 3054 | DECAMETHONIUM BROMIDE         | US Drug | 13       | G   | 9      | -0.269    | 0.341           |
| 3055 | ARIPIRAZOLE                   | US Drug | 13       | B   | 10     | -0.194    | 0.059           |
| 3056 | BROMPERIDOL                   | US Drug | 13       | C   | 10     | 0.1       | -0.054          |
| 3057 | PROTRYPTILINE HYDROCHLORIDE   | US Drug | 13       | D   | 10     | -0.025    | -0.656          |
| 3058 | ACECAINIDE HYDROCHLORIDE      | US Drug | 13       | E   | 10     | -0.241    | -0.297          |
| 3059 | VESAMICOL HYDROCHLORIDE       | US Drug | 13       | F   | 10     | -0.147    | -0.152          |
| 3060 | CARBADOX                      | US Drug | 13       | G   | 10     | -0.573    | 0.297           |
| 3061 | ZILEUTON                      | US Drug | 13       | B   | 11     | -0.439    | 0.244           |
| 3062 | CYPROHEPTADINE HYDROCHLORIDE  | US Drug | 13       | C   | 11     | 0.238     | -0.565          |
| 3063 | PHYTONADIONE                  | US Drug | 13       | D   | 11     | -0.583    | 0.061           |
| 3064 | FLUROTHYL                     | US Drug | 13       | E   | 11     | 0.149     | -0.833          |
| 3065 | NIZATIDINE                    | US Drug | 13       | F   | 11     | -0.597    | -0.585          |
| 3066 | ENROFLOXACIN                  | US Drug | 13       | G   | 11     | -0.407    | 0.3             |
| 3067 | MAFENIDE HYDROCHLORIDE        | US Drug | 14       | B   | 2      | -0.851    | -0.005          |
| 3068 | PUROMYCIN HYDROCHLORIDE       | US Drug | 14       | C   | 2      | 0.158     | -0.613          |
| 3069 | NEFOPAM                       | US Drug | 14       | D   | 2      | -0.883    | 1.502           |
| 3070 | SULFADOXINE                   | US Drug | 14       | E   | 2      | -0.18     | 0.367           |
| 3071 | POTASSIUM p-AMINOBENZOATE     | US Drug | 14       | F   | 2      | 0.053     | 0.931           |
| 3072 | LEVODOPA                      | US Drug | 14       | G   | 2      | -0.618    | 0.258           |
| 3073 | MAPROTIline HYDROCHLORIDE     | US Drug | 14       | B   | 3      | 0.175     | -1.088          |
| 3074 | MEBENDAZOLE                   | US Drug | 14       | C   | 3      | 0.406     | -2.862          |
| 3075 | PIRENZEPINE HYDROCHLORIDE     | US Drug | 14       | D   | 3      | 0.039     | 0.949           |
| 3076 | FINASTERIDE                   | US Drug | 14       | E   | 3      | 0.018     | 0.18            |
| 3077 | BETAMETHASONE VALERATE        | US Drug | 14       | F   | 3      | -0.005    | 1.248           |
| 3078 | RUTOSIDE (rutin)              | US Drug | 14       | G   | 3      | -0.344    | 0.608           |
| 3079 | MECAMYLAMINE HYDROCHLORIDE    | US Drug | 14       | B   | 4      | 0.223     | -0.477          |
| 3080 | NALBUPHINE HYDROCHLORIDE      | US Drug | 14       | C   | 4      | -0.247    | 0.43            |
| 3081 | PRAMOXINE HYDROCHLORIDE       | US Drug | 14       | D   | 4      | -0.039    | 0.494           |
| 3082 | PENTETIC ACID                 | US Drug | 14       | E   | 4      | -0.34     | -0.409          |
| 3083 | ERYTHROMYCIN                  | US Drug | 14       | F   | 4      | -1.041    | -0.237          |
| 3084 | ZOMEPIRAC SODIUM              | US Drug | 14       | G   | 4      | -0.303    | 0.211           |
| 3085 | MECHLORETHAMINE               | US Drug | 14       | B   | 5      | 0.249     | -1.359          |
| 3086 | PROGLUMIDE                    | US Drug | 14       | C   | 5      | 0.608     | 0.238           |
| 3087 | MEPHENESIN                    | US Drug | 14       | D   | 5      | 0.55      | 0.907           |
| 3088 | PROSCILLARIDIN                | US Drug | 14       | E   | 5      | -0.025    | 0.135           |
| 3089 | PROMETHAZINE HYDROCHLORIDE    | US Drug | 14       | F   | 5      | -0.306    | -0.358          |
| 3090 | SPARTEINE SULFATE             | US Drug | 14       | G   | 5      | -0.356    | 0.908           |
| 3091 | MECLIZINE HYDROCHLORIDE       | US Drug | 14       | B   | 6      | 0.381     | -0.111          |
| 3092 | MINAPRINE HYDROCHLORIDE       | US Drug | 14       | C   | 6      | 0.265     | 0.228           |
| 3093 | SULFACHLORPYRIDAZINE          | US Drug | 14       | D   | 6      | 1.285     | 1.204           |
| 3094 | HYDROCORTISONE VALERATE       | US Drug | 14       | E   | 6      | 0.435     | 1.35            |
| 3095 | SCOPOLAMINE HYDROBROMIDE      | US Drug | 14       | F   | 6      | -0.138    | 1.203           |
| 3096 | TESTOSTERONE PROPIONATE       | US Drug | 14       | G   | 6      | 0.472     | 1.383           |
| 3097 | MECLOFENAMATE SODIUM          | US Drug | 14       | B   | 7      | -0.628    | -0.13           |
| 3098 | MEMANTINE HYDROCHLORIDE       | US Drug | 14       | C   | 7      | -0.078    | 0.48            |
| 3099 | SULFADIMETHOXINE              | US Drug | 14       | D   | 7      | 0.298     | 0.938           |



SUPPLEMENTARY DATA

|      | Name                                  | Library | Plate No | Row | Column | ROS score | viability score |
|------|---------------------------------------|---------|----------|-----|--------|-----------|-----------------|
| 3100 | REPAGLINIDE                           | US Drug | 14       | E   | 7      | -0.498    | 0.87            |
| 3101 | THEOPHYLLINE                          | US Drug | 14       | F   | 7      | -0.485    | 0.892           |
| 3102 | METHIMAZOLE                           | US Drug | 14       | G   | 7      | -0.508    | 0.897           |
| 3103 | MEDRYSONE                             | US Drug | 14       | A   | 8      | -0.791    | 0.923           |
| 3104 | ATENOLOL                              | US Drug | 14       | B   | 8      | -0.331    | -0.238          |
| 3105 | SULFAGUANIDINE                        | US Drug | 14       | C   | 8      | -0.086    | 0.87            |
| 3106 | CROTAMITON                            | US Drug | 14       | D   | 8      | -0.712    | -1.282          |
| 3107 | TOLNAFATE                             | US Drug | 14       | E   | 8      | 0.372     | 0.668           |
| 3108 | ENILCONAZOLE                          | US Drug | 14       | F   | 8      | -0.886    | 0.311           |
| 3109 | MEGESTROL ACETATE                     | US Drug | 14       | G   | 8      | 0.448     | -0.308          |
| 3110 | CARBETAPENTANE CITRATE                | US Drug | 14       | A   | 9      | -1.032    | 0.32            |
| 3111 | SULFAMONOMETHOXINE                    | US Drug | 14       | B   | 9      | 0.885     | -0.09           |
| 3112 | CEFPROZIL                             | US Drug | 14       | C   | 9      | 0.003     | -0.958          |
| 3113 | TRIMETHOENZAMIDE HYDROCHLORIDE        | US Drug | 14       | D   | 9      | 0.278     | -0.393          |
| 3114 | FIROCOXIB                             | US Drug | 14       | E   | 9      | -0.412    | -0.448          |
| 3115 | MELPHALAN                             | US Drug | 14       | F   | 9      | 0.379     | -0.393          |
| 3116 | PIMOZIDE                              | US Drug | 14       | G   | 10     | 0.483     | 0.063           |
| 3117 | SULCONAZOLE NITRATE                   | US Drug | 14       | A   | 10     | -0.358    | -0.81           |
| 3118 | METHYL DOPATE HYDROCHLORIDE           | US Drug | 14       | B   | 10     | -0.36     | -1.808          |
| 3119 | VINBLASTINE SULFATE                   | US Drug | 14       | C   | 10     | 0.378     | -3.858          |
| 3120 | LINDANE                               | US Drug | 14       | D   | 10     | -0.38     | -1.094          |
| 3121 | MESTRANOL                             | US Drug | 14       | E   | 11     | -1.188    | 0.084           |
| 3122 | NICARDIPINE HYDROCHLORIDE             | US Drug | 14       | F   | 11     | -0.803    | -1.047          |
| 3123 | RITODRINE HYDROCHLORIDE               | US Drug | 14       | G   | 11     | 0.542     | 0.224           |
| 3124 | SULFAQUINOXALINE SODIUM               | US Drug | 14       | A   | 11     | -0.205    | -0.858          |
| 3125 | CLEBOPRIDE MALEATE                    | US Drug | 14       | B   | 11     | -0.042    | -1.292          |
| 3126 | ACRISORCIN                            | US Drug | 14       | C   | 11     | -0.397    | 0.498           |
| 3127 | PHENYL AMINOSALICYLATE                | US Drug | 15       | A   | 2      | -0.112    | 0.704           |
| 3128 | CETYL PYRIDINIUM CHLORIDE             | US Drug | 15       | B   | 2      | 0.031     | -1.648          |
| 3129 | CHLOROTRIANISENE                      | US Drug | 15       | C   | 2      | -0.75     | 0.648           |
| 3130 | DYPHYLLINE                            | US Drug | 15       | D   | 2      | -0.896    | 0.996           |
| 3131 | ESTRADIOL VALERATE                    | US Drug | 15       | E   | 2      | -0.843    | 0.777           |
| 3132 | METHICILLIN SODIUM                    | US Drug | 15       | F   | 2      | -1.47     | 0.995           |
| 3133 | TESTOSTERONE                          | US Drug | 15       | G   | 3      | -0.42     | 0.293           |
| 3134 | CHLORAMBUCIL                          | US Drug | 15       | A   | 3      | 0.333     | 0.168           |
| 3135 | CHLOROXYLENOL                         | US Drug | 15       | B   | 3      | -0.177    | 0.187           |
| 3136 | TRISODIUM ETHYLENEDIAMINE TETRACETATE | US Drug | 15       | C   | 3      | -0.198    | -0.017          |
| 3137 | ESTRIOL                               | US Drug | 15       | D   | 3      | -0.726    | 0.151           |
| 3138 | METHOXSALEN                           | US Drug | 15       | E   | 3      | -0.478    | 0.593           |
| 3139 | SANGUINARINE SULFATE                  | US Drug | 15       | F   | 4      | 0.373     | 0.889           |
| 3140 | CHLORAMPHENICOL PALMITATE             | US Drug | 15       | G   | 4      | 0.125     | 0.474           |
| 3141 | CHLORPHENIRAMINE (S) MALEATE          | US Drug | 15       | A   | 4      | -0.708    | 0.549           |
| 3142 | EMETINE                               | US Drug | 15       | B   | 4      | 1.321     | -2.232          |
| 3143 | ESTRONE                               | US Drug | 15       | C   | 4      | -0.487    | 0.321           |
| 3144 | METHYLERGONOVINE MALEATE              | US Drug | 15       | D   | 4      | -0.255    | 0.867           |
| 3145 | alpha-TOCHOPHEROL                     | US Drug | 15       | E   | 5      | -0.846    | 0.407           |
| 3146 | CHLORAMPHENICOL HEMISUCCINATE         | US Drug | 15       | F   | 5      | 0.01      | 0.703           |
| 3147 | CHLORPROMAZINE                        | US Drug | 15       | G   | 5      | -0.287    | 0.561           |
| 3148 | ADRENALINE BITARTRATE                 | US Drug | 15       | A   | 5      | -0.09     | 0.34            |
| 3149 | ETHACRYNIC ACID                       | US Drug | 15       | B   | 5      | -0.907    | 0.886           |
| 3150 | METHYLTHIOURACIL                      | US Drug | 15       | C   | 5      | -0.112    | 0.79            |
| 3151 | alpha-TOCHOPHERYL ACETATE             | US Drug | 15       | D   | 6      | 0.091     | 0.428           |
| 3152 | CHLORAMPHENICOL                       | US Drug | 15       | E   | 6      | 1.045     | 0.338           |
| 3153 | CHLORPROPAMIDE                        | US Drug | 15       | F   | 6      | -0.168    | 0.238           |
| 3154 | EQUILIN                               | US Drug | 15       | G   | 6      | 0.452     | 0.132           |
| 3155 | ETHAMBUTOL HYDROCHLORIDE              | US Drug | 15       | A   | 6      | 0.034     | 0.128           |
| 3156 | IMCONAZOLE NITRATE                    | US Drug | 15       | B   | 6      | -0.552    | 0.281           |
| 3157 | DACTINOMYCIN                          | US Drug | 15       | C   | 7      | 3.644     | -3.758          |
| 3158 | CHLORCYCLIZINE HYDROCHLORIDE          | US Drug | 15       | D   | 7      | 0.784     | 0.395           |
| 3159 | CHLORTETRACYCLINE HYDROCHLORIDE       | US Drug | 15       | E   | 7      | 0.642     | 0.759           |
| 3160 | ERGOCALCIFEROL                        | US Drug | 15       | F   | 7      | 0.402     | -0.127          |
| 3161 | ETHINYL ESTRADIOL                     | US Drug | 15       | G   | 7      | 0.019     | 0.262           |
| 3162 | NEOMYCIN SULFATE                      | US Drug | 15       | A   | 7      | -1.25     | 0.483           |
| 3163 | MITOMYCIN C                           | US Drug | 15       | B   | 8      | 1.067     | -2.873          |
| 3164 | CHLORHEXIDINE                         | US Drug | 15       | C   | 8      | 1.273     | -2.074          |
| 3165 | CHLORHALIDONE                         | US Drug | 15       | D   | 8      | -0.438    | -0.057          |
| 3166 | ERGONOVINE MALEATE                    | US Drug | 15       | E   | 8      | 0.09      | -0.383          |
| 3167 | ETHIONAMIDE                           | US Drug | 15       | F   | 8      | 0.548     | 0.312           |
| 3168 | NITROFURAZONE                         | US Drug | 15       | G   | 8      | -1.097    | -0.298          |
| 3169 | DICHLORVOS                            | US Drug | 15       | A   | 9      | -0.255    | 0.096           |
| 3170 | CHLOROCRESOL                          | US Drug | 15       | B   | 9      | 0.777     | 0.282           |
| 3171 | CHLORZOXAZONE                         | US Drug | 15       | C   | 9      | -0.214    | -0.117          |
| 3172 | ERYTHROMYCIN ETHYL SUCCINATE          | US Drug | 15       | D   | 9      | 0.86      | -0.728          |
| 3173 | ETHOPROPazine HYDROCHLORIDE           | US Drug | 15       | E   | 9      | -0.324    | 0.166           |
| 3174 | NITROMIDE                             | US Drug | 15       | F   | 9      | -0.882    | 0.134           |
| 3175 | TEMEFOS                               | US Drug | 15       | G   | 10     | 0.723     | -0.135          |
| 3176 | CHLOROQUINE DIPHOSPHATE               | US Drug | 15       | A   | 10     | -0.807    | 0.358           |
| 3177 | CICLOPIROX OLAMINE                    | US Drug | 15       | B   | 10     | 1.596     | -3.59           |
| 3178 | ESTRADIOL CYPIONATE                   | US Drug | 15       | C   | 10     | -0.045    | -0.047          |
| 3179 | EUCATROPINE HYDROCHLORIDE             | US Drug | 15       | D   | 10     | 0.042     | 0.812           |
| 3180 | NORETHINDRONE ACETATE                 | US Drug | 15       | E   | 10     | -0.874    | 0.334           |
| 3181 | MITOTANE                              | US Drug | 15       | F   | 11     | 0.194     | -0.038          |
| 3182 | CHLOROTHIAZIDE                        | US Drug | 15       | G   | 11     | -0.321    | 0.159           |
| 3183 | CINOXACIN                             | US Drug | 15       | A   | 11     | -0.442    | -0.282          |
| 3184 | ESTRADIOL CYPIONATE                   | US Drug | 15       | B   | 11     | -0.348    | -0.047          |
| 3185 | EUGENOL                               | US Drug | 15       | C   | 11     | -0.069    | 0.431           |
| 3186 | OXIDOPAMINE HYDROCHLORIDE             | US Drug | 15       | D   | 11     | -1.771    | 0.153           |
| 3187 | OXYQUINOLINE HEMISULFATE              | US Drug | 16       | A   | 2      | -0.755    | 0.56            |
| 3188 | THIMEROSAL                            | US Drug | 16       | B   | 2      | 2.525     | -4.901          |
| 3189 | TRIAMCINOLONE                         | US Drug | 16       | C   | 2      | -1.015    | 0.545           |
| 3190 | FLUMEQUINE                            | US Drug | 16       | D   | 2      | 0.236     | 0.333           |
| 3191 | ACECLIDINE                            | US Drug | 16       | E   | 2      | -0.187    | 0.436           |
| 3192 | DOBUTAMINE HYDROCHLORIDE              | US Drug | 16       | F   | 2      | -1.218    | 0.277           |
| 3193 | PENICILLIN G POTASSIUM                | US Drug | 16       | G   | 3      | -1.221    | 0.548           |
| 3194 | THIOGUANINE                           | US Drug | 16       | A   | 3      | 0.856     | 0.028           |
| 3195 | TRIAMCINOLONE ACETONIDE               | US Drug | 16       | B   | 3      | 0.43      | 0.418           |
| 3196 | FLUNARIZINE HYDROCHLORIDE             | US Drug | 16       | C   | 3      | 1.134     | 0.587           |
| 3197 | CAPSAICIN                             | US Drug | 16       | D   | 3      | -0.072    | 0.558           |
| 3198 | EDOXUDINE                             | US Drug | 16       | E   | 3      | -0.8      | 0.153           |
| 3199 | PENICILLIN V POTASSIUM                | US Drug | 16       | F   | 4      | -0.461    | -0.047          |
| 3200 | THIORIDAZINE HYDROCHLORIDE            | US Drug | 16       | G   | 4      | -0.356    | -0.358          |
| 3201 | TRIAMCINOLONE DIACETATE               | US Drug | 16       | A   | 4      | 0.158     | 0.717           |
| 3202 | FLUPHENAZINE HYDROCHLORIDE            | US Drug | 16       | B   | 4      | 0.739     | -0.382          |
| 3203 | FAMPRIDINE                            | US Drug | 16       | C   | 4      | 0.21      | 0.584           |
| 3204 | ENOXACIN                              | US Drug | 16       | D   | 4      | 0.231     | 0.54            |

SUPPLEMENTARY DATA

|      | Name                                | Library | Plate No | Row | Column | ROS score | viability score |
|------|-------------------------------------|---------|----------|-----|--------|-----------|-----------------|
| 3205 | PHENOLPHTHALEIN                     | US Drug | 18       | B   | 5      | -0.444    | 0.438           |
| 3206 | THIOETHANE                          | US Drug | 18       | C   | 5      | 0.073     | -0.317          |
| 3207 | TRIAMTERENE                         | US Drug | 18       | D   | 5      | 0.073     | 0.848           |
| 3208 | FLUTAMIDE                           | US Drug | 18       | E   | 5      | 0.625     | 0.277           |
| 3209 | NICERGOLINE                         | US Drug | 18       | F   | 5      | 0.119     | -0.083          |
| 3210 | ETHISTERONE                         | US Drug | 18       | G   | 5      | 0.579     | 0.891           |
| 3211 | PHENYLEPHRINE HYDROCHLORIDE         | US Drug | 18       | B   | 6      | -0.437    | 0.056           |
| 3212 | TIMOLOL MALEATE                     | US Drug | 18       | C   | 6      | 0.062     | 1.235           |
| 3213 | TRICHLORMETHAZIDE                   | US Drug | 18       | D   | 6      | -0.087    | 0.177           |
| 3214 | DROPERIDOL                          | US Drug | 18       | E   | 6      | 0.292     | -0.215          |
| 3215 | SPIPERONE                           | US Drug | 18       | F   | 6      | -0.715    | -1.208          |
| 3216 | PARAOSANILINE PAMOATE               | US Drug | 18       | G   | 6      | 1.41      | -3.571          |
| 3217 | PHENYLPROPANOLAMINE HYDROCHLORIDE   | US Drug | 18       | B   | 7      | 0.077     | 0.808           |
| 3218 | TOBRAMYCIN                          | US Drug | 18       | C   | 7      | -1.044    | 1.123           |
| 3219 | TRIFLUOPERAZINE HYDROCHLORIDE       | US Drug | 18       | D   | 7      | 0.588     | 0.874           |
| 3220 | FAMOTIDINE                          | US Drug | 18       | E   | 7      | -0.5      | 1.802           |
| 3221 | ERYTHROMYCIN ESTOLATE               | US Drug | 18       | F   | 7      | -0.005    | 0.51            |
| 3222 | PERHEXILINE MALEATE                 | US Drug | 18       | G   | 7      | -0.439    | 0.13            |
| 3223 | PHYSGOSIGMINE SALICYLATE            | US Drug | 18       | B   | 8      | 0.041     | 0.484           |
| 3224 | TOLAZOLINE HYDROCHLORIDE            | US Drug | 18       | C   | 8      | 0.614     | -0.032          |
| 3225 | TRIHXYPHENIDYL HYDROCHLORIDE        | US Drug | 18       | D   | 8      | -0.435    | 0.261           |
| 3226 | ETODOLAC                            | US Drug | 18       | E   | 8      | -0.375    | -0.292          |
| 3227 | ESTRADIOL PROPIONATE                | US Drug | 18       | F   | 8      | -0.733    | 0.324           |
| 3228 | PAROMOMYCIN SULFATE                 | US Drug | 18       | G   | 8      | 0.25      | 0.951           |
| 3229 | PILOCARPINE NITRATE                 | US Drug | 18       | B   | 9      | -0.274    | -0.525          |
| 3230 | TOLBUTAMIDE                         | US Drug | 18       | C   | 9      | -0.413    | -0.188          |
| 3231 | TRIMEPRAZINE TARTRATE               | US Drug | 18       | D   | 9      | -0.834    | -0.432          |
| 3232 | FENOTEROL HYDROBROMIDE              | US Drug | 18       | E   | 9      | -0.492    | -0.277          |
| 3233 | ESTRADIOL BENZOATE                  | US Drug | 18       | F   | 9      | -0.45     | 0.371           |
| 3234 | METHAPYRILENE HYDROCHLORIDE         | US Drug | 18       | G   | 9      | 0.095     | 0.311           |
| 3235 | PINDOLOL                            | US Drug | 18       | B   | 10     | -0.434    | -0.511          |
| 3236 | TRANLYCYPROMINE SULFATE             | US Drug | 18       | C   | 10     | -0.067    | -0.249          |
| 3237 | TRIMETHOPRIM                        | US Drug | 18       | D   | 10     | -0.234    | -0.399          |
| 3238 | FENBUPFEN                           | US Drug | 18       | E   | 10     | 0.064     | 0.182           |
| 3239 | RETINOL                             | US Drug | 18       | F   | 10     | 0.918     | -0.088          |
| 3240 | BETA-PROPIOLACTONE                  | US Drug | 18       | G   | 10     | -0.335    | 0.473           |
| 3241 | PIPERACILLIN SODIUM                 | US Drug | 18       | B   | 11     | -1.002    | -0.337          |
| 3242 | TRIA CETIN                          | US Drug | 18       | C   | 11     | -1.282    | -1.148          |
| 3243 | TRIOXSALEN                          | US Drug | 18       | D   | 11     | -0.407    | -1.432          |
| 3244 | MEBEVERINE HYDROCHLORIDE            | US Drug | 18       | E   | 11     | 0.779     | -1.088          |
| 3245 | ISOTRETINON                         | US Drug | 18       | F   | 11     | 0.997     | -0.482          |
| 3246 | HALCINONIDE                         | US Drug | 18       | G   | 11     | 0.142     | -0.036          |
| 3247 | HYCANTHONE                          | US Drug | 17       | B   | 2      | -0.41     | 0.78            |
| 3248 | TACROLIMUS                          | US Drug | 17       | C   | 2      | -0.64     | 1.208           |
| 3249 | BUPROPION                           | US Drug | 17       | D   | 2      | 0.926     | -3.023          |
| 3250 | KETANSERIN TARTRATE                 | US Drug | 17       | E   | 2      | -0.008    | 1.411           |
| 3251 | BISMUTH SUBSALICYLATE               | US Drug | 17       | F   | 2      | -0.587    | 0.588           |
| 3252 | EPIDRUBICIN HYDROCHLORIDE           | US Drug | 17       | G   | 2      | 1.656     | -5.803          |
| 3253 | PYRIDOSTIGMINE BROMIDE              | US Drug | 17       | B   | 3      | -0.71     | 0.518           |
| 3254 | BROMPHENRAMINE MALEATE              | US Drug | 17       | C   | 3      | -0.412    | 0.414           |
| 3255 | CEFUROXIME AXETIL                   | US Drug | 17       | D   | 3      | -0.578    | 0.408           |
| 3256 | FIPRONIL                            | US Drug | 17       | E   | 3      | 0.403     | -1.027          |
| 3257 | BENZOYL PAS                         | US Drug | 17       | F   | 3      | -0.244    | 0.311           |
| 3258 | VECURONIUM BROMIDE                  | US Drug | 17       | G   | 3      | 0.287     | -0.672          |
| 3259 | ISOXICAM                            | US Drug | 17       | B   | 4      | -0.57     | -0.008          |
| 3260 | SIROLIMUS                           | US Drug | 17       | C   | 4      | 1.048     | -0.983          |
| 3261 | FEXOFENADINE HYDROCHLORIDE          | US Drug | 17       | D   | 4      | -0.135    | -0.062          |
| 3262 | DECOQUINATE                         | US Drug | 17       | E   | 4      | 0.009     | 0.188           |
| 3263 | BROMINDIONE                         | US Drug | 17       | F   | 4      | 0.182     | -0.02           |
| 3264 | ALISKIREN HEMIFUMARATE              | US Drug | 17       | G   | 4      | -1.23     | -0.277          |
| 3265 | LABETALOL HYDROCHLORIDE             | US Drug | 17       | B   | 5      | -0.48     | 0.172           |
| 3266 | PAROXETINE HYDROCHLORIDE            | US Drug | 17       | C   | 5      | 1.955     | -0.033          |
| 3267 | TRIFLURIDINE                        | US Drug | 17       | D   | 5      | 0.38      | -0.032          |
| 3268 | CEFDITORIN PIVOXIL                  | US Drug | 17       | E   | 5      | -1.034    | 0.349           |
| 3269 | CAPOBENIC ACID                      | US Drug | 17       | F   | 5      | 0.225     | 0.018           |
| 3270 | ACAMPROSATE CALCIUM                 | US Drug | 17       | G   | 5      | -0.789    | -0.132          |
| 3271 | LEVAMISOLE HYDROCHLORIDE            | US Drug | 17       | B   | 6      | -0.484    | 0.052           |
| 3272 | ETHYLNOREPINEPHRINE HYDROCHLORIDE   | US Drug | 17       | C   | 6      | 0.507     | 0.823           |
| 3273 | PIRENPERONE                         | US Drug | 17       | D   | 6      | 0.573     | 0.578           |
| 3274 | VALACYCLOVIR HYDROCHLORIDE          | US Drug | 17       | E   | 6      | 0.641     | -0.065          |
| 3275 | ACETOHXAMIDE                        | US Drug | 17       | F   | 6      | 0.303     | 0.368           |
| 3276 | PREDNISOLONE SODIUM PHOSPHATE       | US Drug | 17       | G   | 6      | 0.093     | -0.27           |
| 3277 | MEPENTERMINE SULFATE                | US Drug | 17       | B   | 7      | -0.574    | 0.078           |
| 3278 | ALAPROCLATE                         | US Drug | 17       | C   | 7      | 0.273     | 0.311           |
| 3279 | AVOBENZONE                          | US Drug | 17       | D   | 7      | -0.246    | 0.34            |
| 3280 | DULOXETINE HYDROCHLORIDE            | US Drug | 17       | E   | 7      | -0.175    | 0.042           |
| 3281 | ETHOXZOLAMIDE                       | US Drug | 17       | F   | 7      | -0.873    | 0.175           |
| 3282 | PREGNENOLONE SUCCINATE              | US Drug | 17       | G   | 7      | 0.283     | 0.503           |
| 3283 | METARAMINOL BITARTRATE              | US Drug | 17       | B   | 8      | -0.21     | 0.444           |
| 3284 | ACETRIAZOIC ACID                    | US Drug | 17       | C   | 8      | 0.504     | 0.601           |
| 3285 | ATOVAQUONE                          | US Drug | 17       | D   | 8      | 0.378     | 0.398           |
| 3286 | NISOLDIPINE                         | US Drug | 17       | E   | 8      | 0.273     | 0.058           |
| 3287 | FLUCYTOSINE                         | US Drug | 17       | F   | 8      | 0.012     | 0.136           |
| 3288 | DARIFENACIN HYDROBROMIDE            | US Drug | 17       | G   | 8      | -0.372    | 0.019           |
| 3289 | METHAZOLAMIDE                       | US Drug | 17       | B   | 9      | -0.313    | 0.389           |
| 3290 | VENLAFAXINE                         | US Drug | 17       | C   | 9      | 0.121     | 0.183           |
| 3291 | TRIMETOZINE                         | US Drug | 17       | D   | 9      | 0.034     | 0.373           |
| 3292 | MONTELUKAST SODIUM                  | US Drug | 17       | E   | 9      | -0.011    | 0.518           |
| 3293 | FOMEPIZOLE HYDROCHLORIDE            | US Drug | 17       | F   | 9      | -0.273    | 0.412           |
| 3294 | DESOXYMETASONE                      | US Drug | 17       | G   | 9      | 0.724     | 0.325           |
| 3295 | METHYLBENZETHONIUM CHLORIDE         | US Drug | 17       | B   | 10     | -0.323    | -1.915          |
| 3296 | CITALOPRAM                          | US Drug | 17       | C   | 10     | -0.447    | 0.622           |
| 3297 | ZOXAZOLAMINE                        | US Drug | 17       | D   | 10     | 0.197     | 0.539           |
| 3298 | BENURESTAT                          | US Drug | 17       | E   | 10     | -0.471    | 0.497           |
| 3299 | GLIPIZIDE                           | US Drug | 17       | F   | 10     | -0.148    | 0.145           |
| 3300 | BETAMETHASONE ACETATE               | US Drug | 17       | G   | 10     | -0.286    | -0.096          |
| 3301 | METHYLPREDNISOLONE SODIUM SUCCINATE | US Drug | 17       | B   | 11     | -0.628    | 0.357           |
| 3302 | FLUOXETINE                          | US Drug | 17       | C   | 11     | 0.042     | -0.077          |
| 3303 | CYSTEAMINE HYDROCHLORIDE            | US Drug | 17       | D   | 11     | 0.583     | -0.325          |
| 3304 | BENZOQUINONE                        | US Drug | 17       | E   | 11     | -0.459    | -0.223          |
| 3305 | GUANFACINE                          | US Drug | 17       | F   | 11     | 0.331     | -0.272          |
| 3306 | ERYTHROSINE SODIUM                  | US Drug | 17       | G   | 11     | -1.818    | -0.266          |
| 3307 | ISOFLUPREDNONE ACETATE              | US Drug | 18       | B   | 2      | 0.36      | 0.747           |
| 3308 | DEXPANTHENOL                        | US Drug | 18       | C   | 2      | -0.079    | 0.701           |
| 3309 | BETAMETHAZONE SODIUM PHOSPHATE      | US Drug | 18       | B   | 3      | 0.106     | -0.13           |



SUPPLEMENTARY DATA

|      | Name                         | Library       | Plate No | Row | Column | ROS score | viability score |
|------|------------------------------|---------------|----------|-----|--------|-----------|-----------------|
| 3310 | NONOXYNOL-S                  | US Drug       | 18       | C   | 3      | -0.098    | -3.192          |
| 3311 | MELENGESTROL ACETATE         | US Drug       | 18       | B   | 4      | -0.474    | 0.717           |
| 3312 | DOCOSANOL                    | US Drug       | 18       | C   | 4      | -0.884    | 0.717           |
| 3313 | PHTHALYL SULFACETAMIDE       | US Drug       | 18       | B   | 5      | -0.898    | 0.841           |
| 3314 | OCTODRINE                    | US Drug       | 18       | C   | 5      | 0.58      | 0.858           |
| 3315 | TRICHLORFON                  | US Drug       | 18       | B   | 6      | -0.813    | 0.13            |
| 3316 | ANIRACETAM                   | US Drug       | 18       | C   | 6      | 0.41      | 0.987           |
| 3317 | BEPHENIUM HYDROXYNAPHTHOATE  | US Drug       | 18       | B   | 7      | -0.458    | 0.578           |
| 3318 | PENTOXIFYLLINE               | US Drug       | 18       | C   | 7      | -0.817    | 0.515           |
| 3319 | DIFERODON HYDROCHLORIDE      | US Drug       | 18       | B   | 8      | -0.878    | -0.885          |
| 3320 | AZTREONAM                    | US Drug       | 18       | C   | 8      | -0.559    | -0.38           |
| 3321 | DIATRIZOIC ACID              | US Drug       | 18       | B   | 9      | -0.518    | 0.500           |
| 3322 | CEFAZOLIN SODIUM             | US Drug       | 18       | C   | 9      | -0.188    | 0.005           |
| 3323 | PANTOTHENIC ACID(d) Na salt  | US Drug       | 18       | B   | 10     | -0.401    | -0.148          |
| 3324 | TUBOCURARINE CHLORIDE        | US Drug       | 18       | C   | 10     | 0.477     | -0.788          |
| 3325 | DESONIDE                     | US Drug       | 18       | B   | 11     | 0.411     | 0.135           |
| 3326 | TOLMETIN SODIUM              | US Drug       | 18       | C   | 11     | 1.074     | -1.671          |
| 3327 | URAPIDIL HYDROCHLORIDE       | International | 1        | B   | 2      | 0.136     | -0.387          |
| 3328 | PROXYPHYLLINE                | International | 1        | C   | 2      | -0.754    | 0.227           |
| 3329 | NIMUSTINE                    | International | 1        | D   | 2      | -0.88     | -0.095          |
| 3330 | THIODIGLYCOL                 | International | 1        | E   | 2      | -0.488    | 0.842           |
| 3331 | CEPHARANTHINE                | International | 1        | F   | 2      | 0.273     | -0.761          |
| 3332 | ALCIN                        | International | 1        | G   | 2      | -0.425    | 0.008           |
| 3333 | ZOPICLONE                    | International | 1        | B   | 3      | 0.376     | -2.545          |
| 3334 | MOXISLYTE HYDROCHLORIDE      | International | 1        | C   | 3      | -0.382    | -0.383          |
| 3335 | BETAMIPRON                   | International | 1        | D   | 3      | -0.05     | -1.258          |
| 3336 | SULFAPHENAZOLE               | International | 1        | E   | 3      | 0.407     | -0.031          |
| 3337 | LIFOAMIDE                    | International | 1        | F   | 3      | -0.503    | -0.184          |
| 3338 | MECLOFENOXATE HYDROCHLORIDE  | International | 1        | G   | 3      | -0.593    | 0.655           |
| 3339 | HEXAMETHONIUM BROMIDE        | International | 1        | B   | 4      | 0.078     | 1.299           |
| 3340 | CHLORIMEZANONE               | International | 1        | C   | 4      | 0.072     | 0.647           |
| 3341 | REBAMIPIDE                   | International | 1        | D   | 4      | -0.127    | 0.832           |
| 3342 | HEPTAMINOL HYDROCHLORIDE     | International | 1        | E   | 4      | 0.286     | 1.369           |
| 3343 | PANTETHINE                   | International | 1        | F   | 4      | 0.128     | 0.949           |
| 3344 | CEPHALOSPORIN C SODIUM       | International | 1        | G   | 4      | -0.256    | 2.083           |
| 3345 | CYPROTERONE                  | International | 1        | B   | 5      | 0.548     | 0.004           |
| 3346 | CARNITINE (dl) HYDROCHLORIDE | International | 1        | C   | 5      | 0.485     | -0.887          |
| 3347 | CARMOFUR                     | International | 1        | D   | 5      | -0.05     | -0.377          |
| 3348 | AJMALINE                     | International | 1        | E   | 5      | 0.137     | -1.185          |
| 3349 | OXELCAIDIN CITRATE           | International | 1        | F   | 5      | -0.133    | 0.988           |
| 3350 | KHELLIN                      | International | 1        | G   | 5      | 0.195     | 0.888           |
| 3351 | PERICIAZINE                  | International | 1        | B   | 6      | -0.614    | 0.932           |
| 3352 | FLOPROPIONE                  | International | 1        | C   | 6      | -0.184    | 0.23            |
| 3353 | BUCETIN                      | International | 1        | D   | 6      | -0.427    | -0.587          |
| 3354 | gamma-AMINOBUTYRIC ACID      | International | 1        | E   | 6      | -0.495    | -1.445          |
| 3355 | PYRITINOL                    | International | 1        | F   | 6      | -0.994    | -0.092          |
| 3356 | BERGAPTEN                    | International | 1        | G   | 6      | -0.36     | 0.104           |
| 3357 | RIBOSTAMYCIN SULFATE         | International | 1        | B   | 7      | 0.321     | 0.488           |
| 3358 | GLAFENINE                    | International | 1        | C   | 7      | 0.211     | -0.448          |
| 3359 | LORGLUMIDE SODIUM            | International | 1        | D   | 7      | 0.089     | -0.588          |
| 3360 | BERBERINE CHLORIDE           | International | 1        | E   | 7      | -0.876    | 2.271           |
| 3361 | CORTISONE                    | International | 1        | F   | 7      | 0.437     | 0.678           |
| 3362 | OXIGLUTATIONE DISODIUM SALT  | International | 1        | G   | 7      | -0.011    | 1.034           |
| 3363 | TULOBTEROL                   | International | 1        | B   | 8      | 0.205     | -0.732          |
| 3364 | PIROMIDIC ACID               | International | 1        | C   | 8      | -0.388    | -1.4            |
| 3365 | KAINIC ACID                  | International | 1        | D   | 8      | -0.286    | -1.241          |
| 3366 | PROTOPORPHYRIN IX            | International | 1        | E   | 8      | -0.043    | -0.081          |
| 3367 | AMINOHYDROXYBUTYRIC ACID     | International | 1        | F   | 8      | -0.34     | -0.073          |
| 3368 | BROXYQUINOLINE               | International | 1        | G   | 8      | -0.048    | -0.071          |
| 3369 | GLICLAZIDE                   | International | 1        | B   | 9      | -0.047    | 0.174           |
| 3370 | BUCLADESINE                  | International | 1        | C   | 9      | 0.051     | -0.172          |
| 3371 | SECNIDAZOLE                  | International | 1        | D   | 9      | -0.108    | -2.233          |
| 3372 | GLUTATHIONE                  | International | 1        | E   | 9      | -0.522    | -0.715          |
| 3373 | BUFEXAMAC                    | International | 1        | F   | 9      | 0.111     | -1.98           |
| 3374 | OCTOPAMINE HYDROCHLORIDE     | International | 1        | G   | 9      | 0.49      | -0.678          |
| 3375 | TRIMEBUTINE MALEATE          | International | 1        | B   | 10     | 0.158     | 1.62            |
| 3376 | PRIDINOL METHANESULFONATE    | International | 1        | C   | 10     | 0.313     | -1.368          |
| 3377 | TOLPERISONE HYDROCHLORIDE    | International | 1        | D   | 10     | 0.001     | -0.407          |
| 3378 | RETINYL ACETATE              | International | 1        | E   | 10     | -0.644    | -0.214          |
| 3379 | PIPEMIDIC ACID               | International | 1        | F   | 10     | 0.051     | -0.265          |
| 3380 | HYDROQUINIDINE               | International | 1        | G   | 10     | 0.07      | 1.394           |
| 3381 | PROTIONAMIDE                 | International | 1        | B   | 11     | -0.253    | 1.818           |
| 3382 | ANCTABINE HYDROCHLORIDE      | International | 1        | C   | 11     | 0.583     | 0.404           |
| 3383 | INOSINE                      | International | 1        | D   | 11     | -0.238    | 0.048           |
| 3384 | THIOCTIC ACID                | International | 1        | E   | 11     | -0.503    | -0.191          |
| 3385 | CAMYLOFINE DIHYDROCHLORIDE   | International | 1        | F   | 11     | -0.201    | 0.742           |
| 3386 | PROTOVERATRINE A             | International | 1        | G   | 11     | 0.345     | 0.532           |
| 3387 | METHOPRENE (S)               | International | 2        | B   | 2      | -0.881    | 2.022           |
| 3388 | VINCAMINE                    | International | 2        | C   | 2      | -0.716    | 2.536           |
| 3389 | IDEBENONE                    | International | 2        | D   | 2      | -0.508    | 2.294           |
| 3390 | BUFLOMEDIL HYDROCHLORIDE     | International | 2        | E   | 2      | -0.518    | 1.736           |
| 3391 | MEVASTATIN                   | International | 2        | F   | 2      | 0.176     | -0.222          |
| 3392 | OROTIC ACID                  | International | 2        | G   | 2      | -0.537    | 1.797           |
| 3393 | ARTENIMOL                    | International | 2        | B   | 3      | -1.088    | 0.871           |
| 3394 | BENFLUOREX HYDROCHLORIDE     | International | 2        | C   | 3      | -0.385    | -0.137          |
| 3395 | OXYPHENONIUM BROMIDE         | International | 2        | D   | 3      | 0.031     | 0.997           |
| 3396 | OZAGREL HYDROCHLORIDE        | International | 2        | E   | 3      | -0.604    | 0.579           |
| 3397 | PHENOTHIRIN                  | International | 2        | F   | 3      | -0.088    | 0.881           |
| 3398 | EPIESTRIOL                   | International | 2        | G   | 3      | -0.14     | 0.578           |
| 3399 | TELENZEPINE HYDROCHLORIDE    | International | 2        | B   | 4      | -0.24     | -0.254          |
| 3400 | DROPROPIZINE                 | International | 2        | C   | 4      | -0.021    | -0.41           |
| 3401 | CARBIMAZOLE                  | International | 2        | D   | 4      | -0.295    | -0.156          |
| 3402 | OXALAMINE CITRATE            | International | 2        | E   | 4      | -0.228    | 0.339           |
| 3403 | EFAROXAN HYDROCHLORIDE       | International | 2        | F   | 4      | -0.398    | 0.24            |
| 3404 | DEFERIPRONE                  | International | 2        | G   | 4      | -0.434    | -0.5            |
| 3405 | SILIBININ                    | International | 2        | B   | 5      | 0.441     | 1.832           |
| 3406 | DINITOLMIDE                  | International | 2        | C   | 5      | -0.15     | -0.881          |
| 3407 | LUFENURON                    | International | 2        | D   | 5      | -0.379    | 0.251           |
| 3408 | NAF-TOPIDIL DIHYDROCHLORIDE  | International | 2        | E   | 5      | -0.309    | 0.88            |
| 3409 | BARBITAL                     | International | 2        | F   | 5      | -0.352    | 0.819           |
| 3410 | TOSYLCHLORAMIDE SODIUM       | International | 2        | G   | 5      | -0.179    | 0.165           |
| 3411 | DICHLORISONE ACETATE         | International | 2        | B   | 6      | 0.256     | -0.274          |
| 3412 | FORMESTANE                   | International | 2        | C   | 6      | -0.043    | 0.807           |
| 3413 | NIMESULIDE                   | International | 2        | D   | 6      | 0.121     | 0.933           |
| 3414 | PIRIBEDIL HYDROCHLORIDE      | International | 2        | E   | 6      | -0.124    | 0.35            |

SUPPLEMENTARY DATA

|      | Name                                        | Library       | Plate No | Row | Column | ROS score | viability score |
|------|---------------------------------------------|---------------|----------|-----|--------|-----------|-----------------|
| 3415 | CHLOROPYRAMINE HYDROCHLORIDE                | International | 2        | F   | 8      | 0.288     | -0.295          |
| 3416 | CHINIOFON                                   | International | 2        | G   | 8      | -0.531    | 0.583           |
| 3417 | NIFUROXAZIDE                                | International | 2        | B   | 7      | -0.188    | -0.838          |
| 3418 | PIPENZOLATE BROMIDE                         | International | 2        | C   | 7      | -0.09     | -0.498          |
| 3419 | PROMETALOL HYDROCHLORIDE                    | International | 2        | D   | 7      | -0.057    | 0.001           |
| 3420 | METCRANE                                    | International | 2        | E   | 7      | -0.414    | 0.954           |
| 3421 | CLORGLINE HYDROCHLORIDE                     | International | 2        | F   | 7      | -0.02     | -0.508          |
| 3422 | CINCHOPHEN                                  | International | 2        | G   | 7      | -0.424    | -0.652          |
| 3423 | METERGOLINE                                 | International | 2        | B   | 8      | -1.036    | -1.452          |
| 3424 | BAMBUTEROL HYDROCHLORIDE                    | International | 2        | C   | 8      | 0.119     | -1.118          |
| 3425 | TRICLABENDAZOLE                             | International | 2        | D   | 8      | 0.297     | -0.475          |
| 3426 | TRIMETAZIDINE DIHYDROCHLORIDE               | International | 2        | E   | 8      | 0.079     | -0.201          |
| 3427 | CLEMIZOLE HYDROCHLORIDE                     | International | 2        | F   | 8      | 0.054     | -1.348          |
| 3428 | CARZENIDE                                   | International | 2        | G   | 8      | -0.094    | -1.025          |
| 3429 | DICHLOROPHENE                               | International | 2        | B   | 9      | -0.086    | -0.701          |
| 3430 | DIOSMIN                                     | International | 2        | C   | 9      | 0.108     | -0.207          |
| 3431 | HOMIDIUM BROMIDE                            | International | 2        | D   | 9      | 2.13      | -1.644          |
| 3432 | OXEDRINE                                    | International | 2        | E   | 9      | 0.073     | -0.009          |
| 3433 | NIALAMIDE                                   | International | 2        | F   | 9      | -0.138    | -0.514          |
| 3434 | CARSALAM                                    | International | 2        | G   | 9      | -0.205    | -0.309          |
| 3435 | MECYSTEINE HYDROCHLORIDE                    | International | 2        | B   | 10     | -0.598    | -0.398          |
| 3436 | TROXERUTIN                                  | International | 2        | C   | 10     | -0.071    | 0.1             |
| 3437 | FURALADONE                                  | International | 2        | D   | 10     | -0.039    | 0.541           |
| 3438 | IDAZOXAN HYDROCHLORIDE                      | International | 2        | E   | 10     | -0.182    | 0.273           |
| 3439 | CHLORALOSE                                  | International | 2        | F   | 10     | 0.017     | -0.108          |
| 3440 | beta-NAPHTHOL                               | International | 2        | G   | 10     | -0.126    | -1.879          |
| 3441 | PREGNENOLONE                                | International | 2        | B   | 11     | -0.238    | -1.392          |
| 3442 | NIFENAZONE                                  | International | 2        | C   | 11     | -0.189    | -1.039          |
| 3443 | CHAULMOSULFONE                              | International | 2        | D   | 11     | 0.282     | 0.04            |
| 3444 | IFENPRODIL TARTRATE                         | International | 2        | E   | 11     | 0.231     | -0.5            |
| 3445 | ETICLOPRIDE HYDROCHLORIDE                   | International | 2        | F   | 11     | 0.03      | -1.093          |
| 3446 | TIRATRICAL                                  | International | 2        | G   | 11     | -0.284    | -2.182          |
| 3447 | CEFALONIUM                                  | International | 3        | B   | 2      | -0.118    | -0.351          |
| 3448 | CLOPERASTINE HYDROCHLORIDE                  | International | 3        | C   | 2      | -0.293    | -0.972          |
| 3449 | IPRONIAZID SULFATE                          | International | 3        | D   | 2      | 0.14      | -0.274          |
| 3450 | ORBIFLOXACIN                                | International | 3        | E   | 2      | -0.09     | -0.808          |
| 3451 | EFLOXATE                                    | International | 3        | F   | 2      | 0.043     | -1.03           |
| 3452 | QUININE ETHYL CARBONATE                     | International | 3        | G   | 2      | 0.232     | -0.735          |
| 3453 | TIOXOLONE                                   | International | 3        | B   | 3      | -0.272    | -0.703          |
| 3454 | BENFOTIAMINE                                | International | 3        | C   | 3      | 0.48      | -0.878          |
| 3455 | CHLORQUINALDOL                              | International | 3        | D   | 3      | -0.066    | -0.452          |
| 3456 | PEMPIDINE TARTRATE                          | International | 3        | E   | 3      | -0.439    | -0.204          |
| 3457 | ISAXONINE                                   | International | 3        | F   | 3      | 0.48      | -0.343          |
| 3458 | GALLIC ACID                                 | International | 3        | G   | 3      | 0.035     | 0.691           |
| 3459 | SODIUM TETRADECYL SULFATE                   | International | 3        | B   | 4      | 0.186     | -1.044          |
| 3460 | ERYTHROMYCIN STEARATE                       | International | 3        | C   | 4      | 0.096     | -0.758          |
| 3461 | NITLUMIC ACID                               | International | 3        | D   | 4      | -0.147    | -1.255          |
| 3462 | MIZORIBINE                                  | International | 3        | E   | 4      | 0.029     | -1.394          |
| 3463 | METHEPINE MALEATE                           | International | 3        | F   | 4      | 0.445     | -1.479          |
| 3464 | PROGESTERONE                                | International | 3        | G   | 4      | -2.454    | 0.854           |
| 3465 | CLOFBRIC ACID                               | International | 3        | B   | 5      | -0.359    | -1.474          |
| 3466 | CYCLANDELATE                                | International | 3        | C   | 5      | 0.149     | -1.244          |
| 3467 | HYDRASTININE HYDROCHLORIDE                  | International | 3        | D   | 5      | -0.109    | -1.205          |
| 3468 | SALINOMYCIN SODIUM                          | International | 3        | E   | 5      | 2.045     | -3.381          |
| 3469 | DIACETAMATE                                 | International | 3        | F   | 5      | -0.539    | 0.388           |
| 3470 | FTAXILIDE                                   | International | 3        | G   | 5      | -0.407    | 0.894           |
| 3471 | PENTAMIDINE ISETHIONATE                     | International | 3        | B   | 6      | -0.316    | 0.258           |
| 3472 | AMINOTHIAZOLE                               | International | 3        | C   | 6      | 0.045     | -0.137          |
| 3473 | SULMAZOLE                                   | International | 3        | D   | 6      | -0.083    | -0.29           |
| 3474 | DIMPYCLATE                                  | International | 3        | E   | 6      | 0.018     | -0.02           |
| 3475 | CETRIMONIUM BROMIDE                         | International | 3        | F   | 6      | 0.222     | -0.037          |
| 3476 | OLANZAPINE                                  | International | 3        | G   | 6      | -0.588    | 1.028           |
| 3477 | BITOSCANATE                                 | International | 3        | B   | 7      | -0.577    | -0.791          |
| 3478 | PRASTERONE ACETATE                          | International | 3        | C   | 7      | 0.071     | -0.25           |
| 3479 | CYPERMETHRIN                                | International | 3        | D   | 7      | -0.318    | -0.42           |
| 3480 | CHLORPYRIFOS                                | International | 3        | E   | 7      | -0.132    | -0.1            |
| 3481 | ACRIFLAVINIUM HYDROCHLORIDE                 | International | 3        | F   | 7      | -0.081    | -0.906          |
| 3482 | NOCODAZOLE                                  | International | 3        | G   | 7      | -0.225    | 0.303           |
| 3483 | METACETAMOL                                 | International | 3        | B   | 8      | -1.293    | 1.564           |
| 3484 | DOXIFLURIDINE                               | International | 3        | C   | 8      | -0.378    | -0.132          |
| 3485 | PASINIAZID                                  | International | 3        | D   | 8      | -0.045    | -0.447          |
| 3486 | FENTHION                                    | International | 3        | E   | 8      | -0.28     | 0.282           |
| 3487 | AMINOPYRINE                                 | International | 3        | F   | 8      | -0.216    | 0.085           |
| 3488 | OLEANDOMYCIN PHOSPHATE                      | International | 3        | G   | 8      | -0.403    | 0.774           |
| 3489 | AMINOPTERIN                                 | International | 3        | B   | 9      | -0.381    | 1.754           |
| 3490 | PRASTERONE                                  | International | 3        | C   | 9      | 0.016     | 0.206           |
| 3491 | IPRIFLAVONE                                 | International | 3        | D   | 9      | -0.128    | 0.814           |
| 3492 | GUANIDINE HYDROCHLORIDE                     | International | 3        | E   | 9      | -0.094    | 0.44            |
| 3493 | ENOXAPARIN SODIUM (1% wt/vol in 10%aq DMSO) | International | 3        | F   | 9      | -0.231    | 0.783           |
| 3494 | LANATOSIDE C                                | International | 3        | G   | 9      | 0.085     | 1.552           |
| 3495 | ACEXAMIC ACID                               | International | 3        | B   | 10     | -0.439    | -0.332          |
| 3496 | CITIOLONE                                   | International | 3        | C   | 10     | -0.006    | 0.497           |
| 3497 | PIMETHIXENE MALEATE                         | International | 3        | D   | 10     | 0.385     | 0.285           |
| 3498 | DIBUTYL PHTHALATE                           | International | 3        | E   | 10     | -0.44     | 0.497           |
| 3499 | DIPYROCETYL                                 | International | 3        | F   | 10     | 0.064     | 1.249           |
| 3500 | NALIDIXIC ACID                              | International | 3        | G   | 10     | -0.293    | 1.37            |
| 3501 | PROPENTOFYLLINE                             | International | 3        | B   | 11     | 0.352     | 0.185           |
| 3502 | HYDROXYTOLUIC ACID                          | International | 3        | C   | 11     | 0.271     | 1.059           |
| 3503 | BERGENIN                                    | International | 3        | D   | 11     | 0.227     | 1.544           |
| 3504 | DIACERIN                                    | International | 3        | E   | 11     | -0.109    | 1.224           |
| 3505 | MEPIROXOL                                   | International | 3        | F   | 11     | -0.239    | 1.795           |
| 3506 | MILTEFOSINE                                 | International | 3        | G   | 11     | 0.073     | 1.495           |
| 3507 | MOROXYDINE HYDROCHLORIDE                    | International | 4        | B   | 2      | -0.434    | 0.309           |
| 3508 | DROFENINE HYDROCHLORIDE                     | International | 4        | C   | 2      | -0.234    | 0.415           |
| 3509 | CHROMOCARB                                  | International | 4        | D   | 2      | -0.911    | 0.024           |
| 3510 | SECURININE                                  | International | 4        | E   | 2      | -0.821    | 0.588           |
| 3511 | EXALAMIDE                                   | International | 4        | F   | 2      | -0.17     | 1.01            |
| 3512 | ASCORBIC ACID                               | International | 4        | G   | 2      | -0.065    | 0.217           |
| 3513 | FAMPROFAZONE                                | International | 4        | B   | 3      | 0.479     | 1.147           |
| 3514 | ETHAVERINE HYDROCHLORIDE                    | International | 4        | C   | 3      | 0.776     | -1.618          |
| 3515 | PYRITHYLDIONE                               | International | 4        | D   | 3      | -0.478    | 0.451           |
| 3516 | ANISODAMINE HYDROBROMIDE                    | International | 4        | E   | 3      | -0.175    | 0.495           |
| 3517 | HEXESTROL                                   | International | 4        | F   | 3      | -0.168    | 1.314           |
| 3518 | SULFAGUANIDINE                              | International | 4        | G   | 3      | -0.063    | 0.873           |
| 3519 | HYDROXYPROGESTERONE                         | International | 4        | B   | 4      | -0.482    | 0.292           |

SUPPLEMENTARY DATA

|      | Name                                                       | Library       | Plate No | Row | Column | ROS score | viability score |
|------|------------------------------------------------------------|---------------|----------|-----|--------|-----------|-----------------|
| 3520 | FENDILINE HYDROCHLORIDE                                    | International | 4        | C   | 4      | -1.703    | -1.828          |
| 3521 | BROMOPRIDE                                                 | International | 4        | D   | 4      | -0.335    | 0.499           |
| 3522 | AMBROXOL HYDROCHLORIDE                                     | International | 4        | F   | 4      | -0.092    | 0.152           |
| 3523 | CIANIDANO                                                  | International | 4        | F   | 4      | -0.451    | 0.442           |
| 3524 | COLESEVALAM HYDROCHLORIDE (high mol wt copolymer @10mg/ml) | International | 4        | F   | 4      | -0.388    | 0.559           |
| 3525 | ACETMETACIN                                                | International | 4        | B   | 5      | 0.088     | -0.886          |
| 3526 | ACETAMINOSALOL                                             | International | 4        | C   | 5      | 0.28      | -1.853          |
| 3527 | CLOFOCTOL                                                  | International | 4        | D   | 5      | -0.188    | -0.032          |
| 3528 | PIPEXIDE HYDROCHLORIDE                                     | International | 4        | E   | 5      | 0.282     | 0.213           |
| 3529 | ETHACRIDINE LACTATE                                        | International | 4        | F   | 5      | -0.087    | -0.085          |
| 3530 | FIPRONIL                                                   | International | 4        | A   | 6      | -0.034    | 0.017           |
| 3531 | LOBELINE HYDROCHLORIDE                                     | International | 4        | B   | 6      | -0.584    | 0.011           |
| 3532 | EBSLEN                                                     | International | 4        | C   | 6      | -0.15     | -1.639          |
| 3533 | D-PHENYLALANINE                                            | International | 4        | D   | 6      | -0.375    | 0.488           |
| 3534 | FOSFOSAL                                                   | International | 4        | E   | 6      | -0.374    | -0.025          |
| 3535 | 2-THIOURACIL                                               | International | 4        | F   | 6      | -0.431    | 0.076           |
| 3536 | CYCLOBENZAPRINE HYDROCHLORIDE                              | International | 4        | A   | 6      | -0.547    | -0.006          |
| 3537 | ENOXOLONE                                                  | International | 4        | B   | 6      | -0.329    | -0.541          |
| 3538 | ACETYL-L-LEUCINE                                           | International | 4        | C   | 7      | -0.095    | -1.108          |
| 3539 | SPAGLUMIC ACID                                             | International | 4        | D   | 7      | -0.17     | -0.632          |
| 3540 | HEXETIDINE                                                 | International | 4        | E   | 7      | -0.581    | 0.348           |
| 3541 | DIBEKACIN                                                  | International | 4        | F   | 7      | -0.328    | -0.347          |
| 3542 | ORNITHINE                                                  | International | 4        | A   | 7      | -0.381    | 0.418           |
| 3543 | MEBHYDROLIN NAPHTHALENESULFONATE                           | International | 4        | B   | 8      | -0.45     | -0.574          |
| 3544 | METAMPICILLIN SODIUM                                       | International | 4        | C   | 8      | -0.082    | -0.542          |
| 3545 | GABOXADOL HYDROCHLORIDE                                    | International | 4        | D   | 8      | 0.12      | 0.265           |
| 3548 | VINEURNINE                                                 | International | 4        | E   | 8      | -0.08     | -0.093          |
| 3547 | DEQUALINIUM CHLORIDE                                       | International | 4        | F   | 8      | 0.196     | -0.474          |
| 3548 | BENZTROPINE                                                | International | 4        | A   | 8      | 0.344     | 0.695           |
| 3549 | SUXIBUZONE                                                 | International | 4        | B   | 8      | 0.127     | -0.778          |
| 3550 | ELLAGIC ACID                                               | International | 4        | C   | 9      | 0.06      | -2.977          |
| 3551 | RAMIFENAZONE                                               | International | 4        | D   | 9      | 0.031     | -0.105          |
| 3552 | meta-CRESYL ACETATE                                        | International | 4        | E   | 9      | 0.187     | 0.419           |
| 3553 | CLENBUTEROL HYDROCHLORIDE                                  | International | 4        | F   | 9      | 0.084     | 0.687           |
| 3554 | KETAMINE HYDROCHLORIDE                                     | International | 4        | A   | 9      | 0.021     | 0.278           |
| 3555 | TODRALAZINE HYDROCHLORIDE                                  | International | 4        | B   | 10     | -0.187    | 0.047           |
| 3556 | BENZYL ISOTHIOCYANATE                                      | International | 4        | C   | 10     | -0.775    | -1.277          |
| 3557 | CYTISINE                                                   | International | 4        | D   | 10     | 0.508     | 1.178           |
| 3558 | PROPOXUR                                                   | International | 4        | E   | 10     | 0.105     | 1.343           |
| 3559 | CYSTINE                                                    | International | 4        | F   | 10     | -0.08     | 0.345           |
| 3560 | BUTYLATED HYDROXYTOLUENE                                   | International | 4        | A   | 10     | -0.106    | 1.116           |
| 3561 | TOLFENAMIC ACID                                            | International | 4        | B   | 11     | -0.28     | 1.339           |
| 3562 | ARTEMISININ                                                | International | 4        | C   | 11     | 1.777     | -3.481          |
| 3563 | beta-ESICIN                                                | International | 4        | D   | 11     | -0.014    | -0.09           |
| 3564 | ZARDAVERINE                                                | International | 4        | E   | 11     | 0.011     | 0.874           |
| 3566 | ZAPRINAST                                                  | International | 4        | F   | 11     | 0.734     | 1.575           |
| 3568 | LONIDAMINE                                                 | International | 4        | A   | 11     | -0.142    | 1.207           |
| 3567 | TRICHLORMETHINE                                            | Killer        | 1        | 2   | 2      | -0.866    | 0.503           |
| 3568 | BUSULFAN                                                   | Killer        | 1        | 2   | 2      | -0.031    | 0.627           |
| 3569 | DACARBAZINE                                                | Killer        | 1        | 2   | 2      | -0.144    | 0.176           |
| 3570 | METOTREXATE(4:1)                                           | Killer        | 1        | 2   | 2      | -0.483    | 0.028           |
| 3571 | ACRIFLAVINIUM HYDROCHLORIDE                                | Killer        | 1        | 2   | 2      | -1.022    | 0.16            |
| 3572 | CANAVANINE                                                 | Killer        | 1        | 2   | 2      | -1.185    | 0.371           |
| 3573 | SANGUINARINE SULFATE                                       | Killer        | 1        | 3   | 3      | -1.283    | 1.241           |
| 3574 | CHLORAMBUCIL                                               | Killer        | 1        | 3   | 3      | -0.823    | 0.571           |
| 3575 | DAUNORUBICIN                                               | Killer        | 1        | 3   | 3      | -0.875    | -2.76           |
| 3576 | NITROMIDE                                                  | Killer        | 1        | 3   | 3      | -0.802    | 0.269           |
| 3577 | IPRONIAZID SULFATE                                         | Killer        | 1        | 3   | 3      | -0.78     | 0.481           |
| 3578 | CORALYNE CHLORIDE                                          | Killer        | 1        | 3   | 3      | -0.78     | 0.502           |
| 3579 | VERATRINE SULFATE                                          | Killer        | 1        | 4   | 4      | -1.038    | 0.507           |
| 3580 | CHLORAMPHENICOL                                            | Killer        | 1        | 4   | 4      | -0.668    | 0.622           |
| 3581 | DIBENZOTHIOPHENE                                           | Killer        | 1        | 4   | 4      | -0.789    | 0.557           |
| 3582 | QUINACRINE HYDROCHLORIDE                                   | Killer        | 1        | 4   | 4      | 0.785     | -0.76           |
| 3583 | PHENYL MERCURIC ACETATE                                    | Killer        | 1        | 4   | 4      | -0.89     | -2.574          |
| 3584 | HARMANE                                                    | Killer        | 1        | 4   | 4      | 0.82      | 0.495           |
| 3585 | DACTINOMYCIN                                               | Killer        | 1        | 5   | 5      | 2.445     | -2.481          |
| 3586 | CHLORHEXIDINE                                              | Killer        | 1        | 5   | 5      | -0.842    | -0.952          |
| 3587 | EMETINE                                                    | Killer        | 1        | 5   | 5      | 1.889     | -1.39           |
| 3588 | STREPTOZOSIN                                               | Killer        | 1        | 5   | 5      | -0.358    | 0.26            |
| 3589 | AZELAIC ACID                                               | Killer        | 1        | 5   | 5      | -0.778    | 0.805           |
| 3590 | PROTOVERATRINE B                                           | Killer        | 1        | 5   | 5      | -1.043    | 0.884           |
| 3591 | DICHLORVOS                                                 | Killer        | 1        | 6   | 6      | -0.188    | 0.503           |
| 3592 | CHLOROQUINE DIPHOSPHATE                                    | Killer        | 1        | 6   | 6      | 0.038     | 0.659           |
| 3593 | FLUOROURACIL                                               | Killer        | 1        | 6   | 6      | -0.83     | 0.442           |
| 3594 | THIMEROSAL                                                 | Killer        | 1        | 6   | 6      | 3.217     | -2.714          |
| 3595 | STRYCHNINE                                                 | Killer        | 1        | 6   | 6      | -0.59     | 0.731           |
| 3596 | FERULIC ACID                                               | Killer        | 1        | 6   | 6      | -1.017    | 0.632           |
| 3597 | MITOMYCIN C                                                | Killer        | 1        | 7   | 7      | 0.872     | -1.789          |
| 3598 | CHLORTETRACYCLINE HYDROCHLORIDE                            | Killer        | 1        | 7   | 7      | -2.128    | 0.535           |
| 3599 | HEXACHLOROPHENE                                            | Killer        | 1        | 7   | 7      | 1.981     | -1.85           |
| 3600 | THIOGUANINE                                                | Killer        | 1        | 7   | 7      | 0.078     | 0.847           |
| 3601 | MYCOPHENOLIC ACID                                          | Killer        | 1        | 7   | 7      | 0.434     | -0.24           |
| 3602 | PICROTOXININ                                               | Killer        | 1        | 7   | 7      | -0.883    | 0.638           |
| 3603 | 2,4-DINITROPHENOL                                          | Killer        | 1        | 8   | 8      | -0.888    | 0.317           |
| 3604 | CLINDAMYCIN HYDROCHLORIDE                                  | Killer        | 1        | 8   | 8      | -0.402    | 0.689           |
| 3605 | HYDROXYUREA                                                | Killer        | 1        | 8   | 8      | -0.85     | 0.45            |
| 3606 | TOBRAMYCIN                                                 | Killer        | 1        | 8   | 8      | -0.069    | 0.178           |
| 3607 | OUABAIN                                                    | Killer        | 1        | 8   | 8      | -0.828    | 0.543           |
| 3608 | MIMOSINE                                                   | Killer        | 1        | 8   | 8      | -1.408    | 0.344           |
| 3609 | AMINOGLUTETHIMIDE                                          | Killer        | 1        | 8   | 8      | -0.887    | 0.818           |
| 3610 | COLCHICINE                                                 | Killer        | 1        | 9   | 9      | 1.034     | 0.635           |
| 3611 | MECHLORETHAMINE                                            | Killer        | 1        | 9   | 9      | -0.155    | 0.459           |
| 3612 | VINGLASTINE SULFATE                                        | Killer        | 1        | 9   | 9      | 0.689     | 0.391           |
| 3613 | BERBERINE CHLORIDE                                         | Killer        | 1        | 9   | 9      | 2.165     | -1.933          |
| 3614 | TREFINON                                                   | Killer        | 1        | 9   | 9      | 0.122     | 0.515           |
| 3615 | AMPHOTERICIN B                                             | Killer        | 1        | 10  | 10     | -0.837    | 0.327           |
| 3618 | CYCLOPHOSPHAMIDE HYDRATE                                   | Killer        | 1        | 10  | 10     | 0.154     | 0.828           |
| 3617 | MELPHALAN                                                  | Killer        | 1        | 10  | 10     | -0.147    | 0.271           |
| 3618 | WARFARIN                                                   | Killer        | 1        | 10  | 10     | 0.112     | 0.193           |
| 3619 | CANTHARIDIN                                                | Killer        | 1        | 10  | 10     | -2.26     | -2.058          |
| 3620 | CARMOFUR                                                   | Killer        | 1        | 10  | 10     | -1.254    | 0.588           |
| 3621 | SURAMIN                                                    | Killer        | 1        | 10  | 10     | -0.108    | 0.397           |
| 3622 | AZATHIOPRINE                                               | Killer        | 1        | 11  | 11     | 0.29      | -0.336          |
| 3623 | CYTAABINE                                                  | Killer        | 1        | C   | 11     | 0.873     | 0.299           |
| 3624 | MERCAPTOPURINE                                             | Killer        | 1        | D   | 11     | -0.277    | -0.071          |

SUPPLEMENTARY DATA

|      | Name                                                      | Library | Plate No | Row | Column | ROS score | viability score |
|------|-----------------------------------------------------------|---------|----------|-----|--------|-----------|-----------------|
| 3825 | AZASERINE                                                 | Killer  | 1        | E   | 11     | 0.874     | 0.183           |
| 3826 | PHORBOL MYRISTATE ACETATE                                 | Killer  | 1        | F   | 11     | -0.82     | 0.413           |
| 3827 | ETOPOSIDE                                                 | Killer  | 1        | G   | 11     | -0.544    | -0.179          |
| 3828 | AMSACRINE                                                 | Killer  | 2        | B   | 2      | -0.629    | 0.188           |
| 3829 | CIPROFLOXACIN                                             | Killer  | 2        | C   | 2      | -1.469    | 0.062           |
| 3830 | TANNIC ACID                                               | Killer  | 2        | D   | 2      | 0.722     | 0.01            |
| 3831 | PICROPODOPHYLLIN                                          | Killer  | 2        | E   | 2      | -0.744    | 0.789           |
| 3832 | GARLICIN                                                  | Killer  | 2        | F   | 2      | -0.73     | 0.556           |
| 3833 | ELAIDYLPHOSPHOCHOLINE                                     | Killer  | 2        | G   | 2      | 2.709     | -3.199          |
| 3834 | NICLOSAMIDE                                               | Killer  | 2        | B   | 3      | -0.382    | 0.288           |
| 3836 | CITRININ                                                  | Killer  | 2        | C   | 3      | -0.355    | 0.506           |
| 3838 | FORMESTANE                                                | Killer  | 2        | D   | 3      | -1.039    | 0.38            |
| 3837 | 3H-1,2-DITHIOLE-3-THIONE                                  | Killer  | 2        | E   | 3      | -0.141    | 0.229           |
| 3838 | GRISEOFULVIN                                              | Killer  | 2        | F   | 3      | -0.877    | 0.609           |
| 3839 | 7-NITROINDAZOLE                                           | Killer  | 2        | G   | 3      | 0.247     | -0.728          |
| 3840 | MITOXANTHONE HYDROCHLORIDE                                | Killer  | 2        | B   | 4      | 0.987     | -0.589          |
| 3841 | PACLITAXEL                                                | Killer  | 2        | C   | 4      | 0.042     | 0.185           |
| 3842 | ANCIABINE HYDROCHLORIDE                                   | Killer  | 2        | D   | 4      | 0.578     | 0.361           |
| 3843 | BLASTICIDIN S                                             | Killer  | 2        | E   | 4      | -0.323    | 0.617           |
| 3844 | AURAPTENE                                                 | Killer  | 2        | F   | 4      | -0.749    | 0.754           |
| 3845 | L-ALANINOL                                                | Killer  | 2        | G   | 4      | -0.637    | 0.601           |
| 3846 | URETHANE                                                  | Killer  | 2        | B   | 5      | 0.248     | 0.488           |
| 3847 | TACROLIMUS                                                | Killer  | 2        | C   | 5      | -0.404    | 0.605           |
| 3848 | NIMUSTINE                                                 | Killer  | 2        | D   | 5      | -0.704    | 0.632           |
| 3849 | 4-[3-BUTOXY-4-METHOXYBENZYL]IMIDAZOLIDIN-2-ONE            | Killer  | 2        | E   | 5      | -0.885    | 0.284           |
| 3850 | RUBESCENSIN A                                             | Killer  | 2        | F   | 5      | -0.899    | 0.811           |
| 3851 | TANSHINONE IIA                                            | Killer  | 2        | G   | 5      | -0.424    | 0.342           |
| 3852 | THIOTEPA                                                  | Killer  | 2        | B   | 6      | 0.649     | -0.439          |
| 3853 | SIROLIMUS                                                 | Killer  | 2        | C   | 6      | 0.184     | 0.377           |
| 3854 | NORCANTHARIDIN                                            | Killer  | 2        | D   | 6      | -0.507    | 0.451           |
| 3855 | 2,3-DICHLORO-5,8-DIHYDROXYNAPHTHOQUINONE                  | Killer  | 2        | E   | 6      | -0.235    | 0.507           |
| 3856 | NOBILETIN                                                 | Killer  | 2        | F   | 6      | -1.307    | 0.391           |
| 3857 | ARSENIC TRIOXIDE                                          | Killer  | 2        | G   | 6      | -0.853    | 0.335           |
| 3858 | PIPOBROMAN                                                | Killer  | 2        | B   | 7      | 0.131     | -0.855          |
| 3859 | TENIPOSIDE                                                | Killer  | 2        | C   | 7      | -0.648    | 0.44            |
| 3860 | BOVINOCIDIN (3-nitropropionic acid)                       | Killer  | 2        | D   | 7      | -0.514    | 0.374           |
| 3861 | 2,2'-AZO-bis-2-AMINOPROPANE                               | Killer  | 2        | E   | 7      | 0.558     | 0.451           |
| 3862 | VINCISTINE SULFATE                                        | Killer  | 2        | F   | 7      | 0.836     | 0.201           |
| 3863 | CLOFAZIMINE                                               | Killer  | 2        | G   | 7      | -0.63     | 0.077           |
| 3864 | SEMUSTINE                                                 | Killer  | 2        | B   | 8      | -1.118    | -0.473          |
| 3865 | GOSSYPOL                                                  | Killer  | 2        | C   | 8      | 0.372     | -0.484          |
| 3866 | TETRANDRINE                                               | Killer  | 2        | D   | 8      | -0.728    | 0.064           |
| 3867 | 4,4'-DIISOTHIOCYANOSTILBENE-2,2'-SUFONIC ACID SODIUM SALT | Killer  | 2        | E   | 8      | -0.634    | 0.264           |
| 3868 | RIFAXIMIN                                                 | Killer  | 2        | F   | 8      | -1.117    | 2.461           |
| 3869 | TOREMIPHENE CITRATE                                       | Killer  | 2        | G   | 8      | -0.242    | 0.17            |
| 3870 | ACYCLOVIR                                                 | Killer  | 2        | B   | 9      | 0.055     | 0.388           |
| 3871 | PHYSCION                                                  | Killer  | 2        | C   | 9      | 3.028     | -3.424          |
| 3872 | PRISTIMERIN                                               | Killer  | 2        | D   | 9      | -0.202    | 0.135           |
| 3873 | 2-AMINOGLUANIDINE HEMISULFATE                             | Killer  | 2        | E   | 9      | -0.288    | 0.42            |
| 3874 | PERILLYL ALCOHOL                                          | Killer  | 2        | F   | 9      | -0.449    | 0.485           |
| 3875 | FLUDARABINE PHOSPHATE                                     | Killer  | 2        | G   | 9      | 1.632     | -2.307          |
| 3876 | BENZALKONIUM CHLORIDE                                     | Killer  | 2        | B   | 10     | 1.153     | -1.988          |
| 3877 | METHOPRENE (S)                                            | Killer  | 2        | C   | 10     | 0.158     | 0.455           |
| 3878 | CYTOCHALASIN A                                            | Killer  | 2        | D   | 10     | -0.483    | 0.095           |
| 3879 | ATOVAQUONE                                                | Killer  | 2        | E   | 10     | 0.026     | 0.428           |
| 3880 | MUPIROCIN                                                 | Killer  | 2        | G   | 10     | -0.402    | 0.567           |
| 3881 | ETANIDAZOLE                                               | Killer  | 2        | B   | 11     | 0.032     | -0.22           |
| 3882 | ALENDRONATE SODIUM                                        | Killer  | 2        | C   | 11     | -0.186    | -0.311          |
| 3883 | 10-HYDROXYCAMPOTHECIN                                     | Killer  | 2        | D   | 11     | 1.553     | -0.781          |
| 3884 | CLORSULON                                                 | Killer  | 2        | E   | 11     | -0.249    | 0.041           |
| 3885 | 6-AMINONICOTINAMIDE                                       | Killer  | 2        | F   | 11     | -0.311    | 0.215           |
| 3886 | EPIDRUBICIN HYDROCHLORIDE                                 | Killer  | 2        | G   | 11     | 2.344     | -3.302          |
| 3887 | GAMBOGIC ACID                                             | Killer  | 3        | B   | 2      | 2.844     | -2.827          |
| 3888 | LAPACHOL                                                  | Killer  | 3        | C   | 2      | -0.849    | 0.505           |
| 3889 | CYTOCHALASIN D                                            | Killer  | 3        | D   | 2      | 1.782     | -1.967          |
| 3890 | DOXORUBICIN                                               | Killer  | 3        | E   | 2      | 2.573     | -2.757          |
| 3891 | ROTENONE                                                  | Killer  | 3        | B   | 3      | 1.079     | -0.556          |
| 3892 | BRUCINE                                                   | Killer  | 3        | C   | 3      | -0.777    | 0.422           |
| 3893 | AMYGDALIN                                                 | Killer  | 3        | D   | 3      | -0.515    | 0.62            |
| 3894 | IFOSFAMIDE                                                | Killer  | 3        | E   | 3      | -0.471    | 0.324           |
| 3895 | AKLAVINE HYDROCHLORIDE                                    | Killer  | 3        | B   | 4      | -0.39     | -0.042          |
| 3896 | CARBOPLATIN                                               | Killer  | 3        | C   | 4      | -0.456    | 0.237           |
| 3897 | ELLAGIC ACID                                              | Killer  | 3        | D   | 4      | -1.001    | -0.019          |
| 3898 | DILOXANIDE FUROATE                                        | Killer  | 3        | E   | 4      | -0.441    | 0.198           |
| 3899 | CELASTROL                                                 | Killer  | 3        | B   | 5      | 2.794     | -2.79           |
| 3700 | CISPLATIN                                                 | Killer  | 3        | C   | 5      | -0.459    | 0.586           |
| 3701 | BENZYL ISOTHIOCYANATE                                     | Killer  | 3        | D   | 5      | -0.807    | 0.543           |
| 3702 | CHLOROPHYLLIDE Cu COMPLEX Na SALT                         | Killer  | 3        | E   | 5      | -0.487    | 0.801           |
| 3703 | DEGUELIN(-)                                               | Killer  | 3        | B   | 6      | 1.886     | -2.078          |
| 3704 | ANTIMYCIN A (A1 shown)                                    | Killer  | 3        | C   | 6      | 1.933     | -2.043          |
| 3705 | AKLOMIDE                                                  | Killer  | 3        | D   | 6      | -0.591    | 0.335           |
| 3706 | TRIDIMEFON                                                | Killer  | 3        | E   | 6      | -0.583    | 0.493           |
| 3707 | GAMBOGIC ACID AMIDE                                       | Killer  | 3        | B   | 7      | 3.104     | -2.92           |
| 3708 | AZACITIDINE                                               | Killer  | 3        | C   | 7      | -0.051    | -0.519          |
| 3709 | FLOXURIDINE                                               | Killer  | 3        | D   | 7      | -0.341    | 0.281           |
| 3710 | DIBENZOYLMETHANE                                          | Killer  | 3        | E   | 7      | -0.852    | 0.643           |
| 3711 | RUTILANTINONE                                             | Killer  | 3        | B   | 8      | -0.4      | 0.752           |
| 3712 | ACETARSOL                                                 | Killer  | 3        | C   | 8      | -0.226    | 0.4             |
| 3713 | ALTRETAMINE                                               | Killer  | 3        | D   | 8      | -0.388    | 0.446           |
| 3714 | CAPSANTHIN                                                | Killer  | 3        | E   | 8      | -0.363    | 0.808           |
| 3715 | 2,6-DIMETHOXYQUINONE                                      | Killer  | 3        | B   | 9      | -0.586    | 0.24            |
| 3716 | p-FLUOROPHENYLALANINE                                     | Killer  | 3        | C   | 9      | -0.162    | 0.259           |
| 3717 | CARMUSTINE                                                | Killer  | 3        | D   | 9      | 0.032     | 0.347           |
| 3718 | BENZANTHRONE                                              | Killer  | 3        | E   | 9      | 1.027     | -0.741          |
| 3719 | JUGLONE                                                   | Killer  | 3        | B   | 10     | -0.788    | 0.022           |
| 3720 | CYCLOSPORINE                                              | Killer  | 3        | C   | 10     | -1.013    | 0.084           |
| 3721 | BETA-PROPIOLACTONE                                        | Killer  | 3        | D   | 10     | -0.054    | 0.305           |
| 3722 | CAMPOTHECIN                                               | Killer  | 3        | E   | 10     | 0.76      | -0.64           |
| 3723 | AGELASINE (stereochemistry of diterpene unknown)          | Killer  | 3        | B   | 11     | -0.429    | -0.63           |
| 3724 | PERILLIC ACID (-)                                         | Killer  | 3        | C   | 11     | -0.184    | 0.306           |
| 3725 | HYCANTHONE                                                | Killer  | 3        | D   | 11     | 0.401     | 0.222           |
| 3726 | CYTOCHALASIN B                                            | Killer  | 3        | E   | 11     | 1.946     | -0.747          |
| 3727 | DL-alpha-Methyl-p-tyrosine                                | LOPAC   | 1        | A   | 2      | -2.033    | 0.071           |
| 3728 | N-Phenylanthranilic acid                                  | LOPAC   | 1        | B   | 2      | -0.054    | -0.849          |
| 3729 | S(-)-p-Bromotetramisole oxalate                           | LOPAC   | 1        | C   | 2      | -0.618    | -0.532          |



SUPPLEMENTARY DATA

|      | Name                                                          | Library | Plate No | Row | Column | ROS score | viability score |
|------|---------------------------------------------------------------|---------|----------|-----|--------|-----------|-----------------|
| 3730 | 5-Aminovaleric acid hydrochloride                             | LOPAC   | 1        | D   | 2      | 0.143     | -0.762          |
| 3731 | (±)-Nipoic acid                                               | LOPAC   | 1        | E   | 2      | -0.188    | -1.201          |
| 3732 | Azelic acid                                                   | LOPAC   | 1        | F   | 2      | -0.085    | -0.381          |
| 3733 | Tryptamine hydrochloride                                      | LOPAC   | 1        | G   | 2      | -0.598    | -0.118          |
| 3734 | 5-Fluoroindole-2-carboxylic acid                              | LOPAC   | 1        | H   | 2      | -0.626    | 0.81            |
| 3735 | 6-Methoxy-1,2,3,4-tetrahydro-9H-pyrido[3,4b]indole            | LOPAC   | 1        | A   | 3      | -1.759    | 0.253           |
| 3736 | S-(4-Nitrobenzyl)-6-thioguanosine                             | LOPAC   | 1        | B   | 3      | -0.268    | -0.758          |
| 3737 | TMB-8 hydrochloride                                           | LOPAC   | 1        | C   | 3      | 0.268     | 0.168           |
| 3738 | 4-Aminopyridine                                               | LOPAC   | 1        | D   | 3      | 0.125     | -0.273          |
| 3739 | Atropine sulfate                                              | LOPAC   | 1        | E   | 3      | 0.355     | 0.188           |
| 3740 | Atropine methyl nitrate                                       | LOPAC   | 1        | F   | 3      | -0.027    | 0.458           |
| 3741 | Arcaine sulfate                                               | LOPAC   | 1        | G   | 3      | -0.577    | 0.837           |
| 3742 | 1-Aminocyclopropanecarboxylic acid hydrochloride              | LOPAC   | 1        | H   | 3      | -0.409    | 1.283           |
| 3743 | Acetamide                                                     | LOPAC   | 1        | A   | 4      | -0.382    | 0.354           |
| 3744 | Org 24598 lithium salt                                        | LOPAC   | 1        | B   | 4      | -0.074    | -0.298          |
| 3745 | L-Zetidine-2-carboxylic acid                                  | LOPAC   | 1        | C   | 4      | 0.447     | -0.8            |
| 3746 | p-Aminoclonidine hydrochloride                                | LOPAC   | 1        | D   | 4      | -0.025    | -0.682          |
| 3747 | 3-aminobenzamide                                              | LOPAC   | 1        | E   | 4      | 0.13      | -0.447          |
| 3748 | (±)-Norepinephrine (+)bitartrate                              | LOPAC   | 1        | F   | 4      | -0.528    | -0.4            |
| 3749 | 4-Amino-1,8-naphthalimide                                     | LOPAC   | 1        | G   | 4      | -0.313    | 0.709           |
| 3750 | Reserpine                                                     | LOPAC   | 1        | H   | 4      | 0.078     | 1.885           |
| 3751 | Amantadine hydrochloride                                      | LOPAC   | 1        | A   | 5      | -1.562    | 0.595           |
| 3752 | Aminophylline ethylenediamine                                 | LOPAC   | 1        | B   | 5      | 0.035     | 0.108           |
| 3753 | S-(p-Azidophenacyl)glutathione                                | LOPAC   | 1        | C   | 5      | 0.063     | -0.162          |
| 3754 | Aminopterin                                                   | LOPAC   | 1        | D   | 5      | 0.885     | -0.191          |
| 3755 | N-Acetyl-5-hydroxytryptamine                                  | LOPAC   | 1        | E   | 5      | -0.125    | -0.864          |
| 3756 | Aurintricarboxylic acid                                       | LOPAC   | 1        | F   | 5      | -0.032    | 0.044           |
| 3757 | (±)-2-Amino-3-phosphobutyric acid                             | LOPAC   | 1        | G   | 5      | 0.357     | 0.588           |
| 3758 | N-arachidonylglycine                                          | LOPAC   | 1        | H   | 5      | -0.897    | 1.218           |
| 3759 | GABA                                                          | LOPAC   | 1        | A   | 6      | 0.145     | 0.678           |
| 3760 | 3'-Azido-3'-deoxythymidine                                    | LOPAC   | 1        | B   | 6      | 0.023     | 0.122           |
| 3761 | Acetyl-beta-methylcholine chloride                            | LOPAC   | 1        | C   | 6      | 0.618     | -0.601          |
| 3762 | 5-azacytidine                                                 | LOPAC   | 1        | D   | 6      | 1.533     | -3.95           |
| 3763 | 5-(N-Ethyl-N-isopropyl)amiloride                              | LOPAC   | 1        | E   | 6      | 0.981     | -0.819          |
| 3764 | 3-Aminopropionitrile fumarate                                 | LOPAC   | 1        | F   | 6      | 0.064     | -0.969          |
| 3765 | Apigenin                                                      | LOPAC   | 1        | G   | 6      | -0.531    | 2.148           |
| 3766 | (+)-Butaclamol hydrochloride                                  | LOPAC   | 1        | H   | 6      | 1.93      | -4.082          |
| 3767 | Gabaculine hydrochloride                                      | LOPAC   | 1        | A   | 7      | -0.717    | 1.049           |
| 3768 | YM 976                                                        | LOPAC   | 1        | B   | 7      | 0.241     | 0.739           |
| 3769 | AA-861                                                        | LOPAC   | 1        | C   | 7      | 0.233     | -0.527          |
| 3770 | 9-Amino-1,2,3,4-tetrahydroacridine hydrochloride              | LOPAC   | 1        | D   | 7      | 0.176     | -0.043          |
| 3771 | 10058-F4                                                      | LOPAC   | 1        | E   | 7      | 0.709     | -0.057          |
| 3772 | 1-Aminobenzotriazole                                          | LOPAC   | 1        | F   | 7      | -0.5      | 0.308           |
| 3773 | 3-Amino-1-propanesulfonic acid sodium                         | LOPAC   | 1        | G   | 7      | -0.303    | 1.336           |
| 3774 | Apomorphine hydrochloride hemihydrate                         | LOPAC   | 1        | H   | 7      | -1.31     | 1.858           |
| 3775 | O-(Carboxymethyl)hydroxylamine hemihydrochloride              | LOPAC   | 1        | A   | 8      | -1.223    | 0.978           |
| 3776 | 5-(N,N-Dimethyl)amiloride hydrochloride                       | LOPAC   | 1        | B   | 8      | -0.304    | 0.165           |
| 3777 | Azathioprine                                                  | LOPAC   | 1        | C   | 8      | 0.487     | 0.19            |
| 3778 | Acyclovir                                                     | LOPAC   | 1        | D   | 8      | 0.86      | -0.341          |
| 3779 | Amipribose hydrochloride                                      | LOPAC   | 1        | E   | 8      | 0.498     | 0.813           |
| 3780 | Sandoz 58-035                                                 | LOPAC   | 1        | F   | 8      | -0.625    | 0.083           |
| 3781 | (±)-2-Amino-3-phosphonopropionic acid                         | LOPAC   | 1        | G   | 8      | -0.555    | 1.152           |
| 3782 | L-Arginine                                                    | LOPAC   | 1        | H   | 8      | -1.711    | 1.184           |
| 3783 | (±)-2-Amino-7-phosphonoheptanoic acid                         | LOPAC   | 1        | A   | 9      | -0.511    | -0.778          |
| 3784 | (±)-2-Amino-5-phosphonopentanoic acid                         | LOPAC   | 1        | B   | 9      | 0.684     | -0.604          |
| 3785 | L-732,138                                                     | LOPAC   | 1        | C   | 9      | 0.749     | -0.657          |
| 3786 | Acetylsalicylic acid                                          | LOPAC   | 1        | D   | 9      | 1.091     | -0.648          |
| 3787 | Aconitine                                                     | LOPAC   | 1        | E   | 9      | 1.144     | -0.4            |
| 3788 | Acetylthiocholine chloride                                    | LOPAC   | 1        | F   | 9      | 0.081     | 0.194           |
| 3789 | 4-Androsten-4-ol-3,17-dione                                   | LOPAC   | 1        | G   | 9      | -0.538    | 0.781           |
| 3790 | 2-(2-Aminoethyl)isothioureia dihydrobromide                   | LOPAC   | 1        | H   | 9      | -1.781    | 0.999           |
| 3791 | N-Acetylprocainamide hydrochloride                            | LOPAC   | 1        | A   | 10     | -0.861    | -0.658          |
| 3792 | Sodium Taurocholate hydrate                                   | LOPAC   | 1        | B   | 10     | 0.37      | -0.305          |
| 3793 | Amifostine                                                    | LOPAC   | 1        | C   | 10     | 0.186     | 1.314           |
| 3794 | Acetazolamide                                                 | LOPAC   | 1        | D   | 10     | 0.91      | 0.079           |
| 3795 | Arecoline hydrobromide                                        | LOPAC   | 1        | E   | 10     | 0.708     | -0.382          |
| 3796 | A-315456                                                      | LOPAC   | 1        | F   | 10     | 0.329     | 0.204           |
| 3797 | GR 46611                                                      | LOPAC   | 1        | G   | 10     | -0.844    | 1.249           |
| 3798 | 2-Hydroxysaclofen                                             | LOPAC   | 1        | H   | 10     | -1.609    | 0.441           |
| 3799 | Actinonin                                                     | LOPAC   | 1        | A   | 11     | -0.329    | -0.7            |
| 3800 | Methotrexate hydrate                                          | LOPAC   | 1        | B   | 11     | 0.878     | -0.611          |
| 3801 | Atropine methyl bromide                                       | LOPAC   | 1        | C   | 11     | -0.093    | -0.629          |
| 3802 | Amperozide hydrochloride                                      | LOPAC   | 1        | D   | 11     | 0.142     | -1.075          |
| 3803 | Aminoguanidine hemisulfate                                    | LOPAC   | 1        | E   | 11     | 0.265     | -0.712          |
| 3804 | Agmatine sulfate                                              | LOPAC   | 1        | F   | 11     | -0.205    | 0.31            |
| 3805 | 4-Aminobenzamidine dihydrochloride                            | LOPAC   | 1        | G   | 11     | -0.987    | 0.501           |
| 3806 | 3-Aminopropylphosphonic acid                                  | LOPAC   | 1        | H   | 11     | -1.617    | 1.082           |
| 3807 | N-Acetyl-L-Cysteine                                           | LOPAC   | 2        | A   | 2      | -0.526    | -1.269          |
| 3808 | L-2-aminoadipic acid                                          | LOPAC   | 2        | B   | 2      | 0.099     | -1.878          |
| 3809 | N-Acetyltryptamine                                            | LOPAC   | 2        | C   | 2      | 0.919     | -0.304          |
| 3810 | Amiloride hydrochloride                                       | LOPAC   | 2        | D   | 2      | 0.482     | 0.021           |
| 3811 | (±)-Atenolol                                                  | LOPAC   | 2        | E   | 2      | 0.353     | 0.883           |
| 3812 | Chlormethiazole hydrochloride                                 | LOPAC   | 2        | F   | 2      | -0.047    | 0.318           |
| 3813 | L-allylglycine                                                | LOPAC   | 2        | G   | 2      | -0.226    | 0.553           |
| 3814 | ABT-418 hydrochloride                                         | LOPAC   | 2        | H   | 2      | -0.182    | -0.55           |
| 3815 | 6-Aminohexanoic acid                                          | LOPAC   | 2        | A   | 3      | -0.76     | -0.458          |
| 3816 | ATPO                                                          | LOPAC   | 2        | B   | 3      | 0.228     | -1.073          |
| 3817 | Allopurinol                                                   | LOPAC   | 2        | C   | 3      | 0.336     | -0.33           |
| 3818 | Amitriptyline hydrochloride                                   | LOPAC   | 2        | D   | 3      | 0.423     | -0.179          |
| 3819 | Amiodarone hydrochloride                                      | LOPAC   | 2        | E   | 3      | 0.152     | -0.684          |
| 3820 | 4-(2-Aminoethyl)benzenesulfonyl fluoride hydrochloride        | LOPAC   | 2        | F   | 3      | -0.963    | -0.065          |
| 3821 | Ancitabine hydrochloride                                      | LOPAC   | 2        | G   | 3      | -0.458    | -0.675          |
| 3822 | Alprenolol hydrochloride                                      | LOPAC   | 2        | H   | 3      | -1.428    | -0.745          |
| 3823 | Altretamine                                                   | LOPAC   | 2        | A   | 4      | -0.642    | -0.98           |
| 3824 | 2-[Methylthio]adenosine 5'-diphosphate trisodium salt hydrate | LOPAC   | 2        | B   | 4      | 0.114     | -1.574          |
| 3825 | Aminoguanidine hydrochloride                                  | LOPAC   | 2        | C   | 4      | 0.42      | -1.358          |
| 3826 | BW 284c51                                                     | LOPAC   | 2        | D   | 4      | -0.041    | -0.763          |
| 3827 | Adenosine                                                     | LOPAC   | 2        | E   | 4      | 0.063     | -1.369          |
| 3828 | L-Aspartic acid                                               | LOPAC   | 2        | F   | 4      | -0.589    | -0.547          |
| 3829 | Astaxanthin                                                   | LOPAC   | 2        | G   | 4      | -0.106    | -0.449          |
| 3830 | N-(4-Amino-2-chlorophenyl)phthalimide                         | LOPAC   | 2        | H   | 4      | -0.704    | -1.477          |
| 3831 | Adenosine 3',5'-cyclic monophosphate                          | LOPAC   | 2        | A   | 5      | -0.926    | 0.503           |
| 3832 | L(-)-Norepinephrine bitartrate                                | LOPAC   | 2        | B   | 5      | -0.308    | 0.712           |
| 3833 | 5-(N,N-hexamethylene)amiloride                                | LOPAC   | 2        | C   | 5      | 0.279     | 0.875           |
| 3834 | Fulvestrant                                                   | LOPAC   | 2        | D   | 5      | 0.144     | 1.448           |



SUPPLEMENTARY DATA

|      | Name                                               | Library | Plate No | Row | Column | ROS score | viability score |
|------|----------------------------------------------------|---------|----------|-----|--------|-----------|-----------------|
| 3835 | (±)-p-Aminoglutethimide                            | LOPAC   | 2        | E   | 5      | -0.272    | -0.018          |
| 3836 | (±)-HA-966                                         | LOPAC   | 2        | F   | 5      | -0.301    | 0.384           |
| 3837 | Lercanidipine hydrochloride hemihydrate            | LOPAC   | 2        | G   | 5      | -0.388    | 1.548           |
| 3838 | Amsacrine hydrochloride                            | LOPAC   | 2        | H   | 5      | -0.92     | 0.885           |
| 3839 | (±)-AMT hydrochloride                              | LOPAC   | 2        | A   | 6      | -1.11     | 1.307           |
| 3840 | Paroxetine hydrochloride hemihydrate (MW = 374.83) | LOPAC   | 2        | B   | 6      | 1.182     | -0.37           |
| 3841 | Antozoline hydrochloride                           | LOPAC   | 2        | C   | 6      | -0.127    | -0.248          |
| 3842 | Aniracetam                                         | LOPAC   | 2        | D   | 6      | -0.034    | 0.182           |
| 3843 | HEMADO                                             | LOPAC   | 2        | E   | 6      | -0.339    | -0.428          |
| 3844 | 8-(p-Sulfophenyl)theophylline                      | LOPAC   | 2        | F   | 6      | -0.572    | 0.12            |
| 3845 | 1,3-Dipropyl-8-p-sulphonylxanthine                 | LOPAC   | 2        | G   | 6      | -0.151    | 0.045           |
| 3846 | 2-Methylthioadenosine triphosphate tetrasodium     | LOPAC   | 2        | H   | 6      | -0.587    | 0.844           |
| 3847 | 5'-Amino-5'-deoxyadenosine p-toluenesulfonate salt | LOPAC   | 2        | A   | 7      | -1.302    | 0.563           |
| 3848 | PNU-37883A                                         | LOPAC   | 2        | B   | 7      | -0.389    | -0.294          |
| 3849 | Tracazolate                                        | LOPAC   | 2        | C   | 7      | 0.379     | 0.154           |
| 3850 | Amoxapine                                          | LOPAC   | 2        | D   | 7      | 0.885     | -1.271          |
| 3851 | Aminobenztrpine                                    | LOPAC   | 2        | E   | 7      | -0.102    | -1.604          |
| 3852 | Arecidine propargyl ester hydrobromide             | LOPAC   | 2        | F   | 7      | -0.534    | -1.812          |
| 3853 | Indinubin-3'-oxime                                 | LOPAC   | 2        | G   | 7      | -0.187    | -0.833          |
| 3854 | S(-)-Atenolol                                      | LOPAC   | 2        | H   | 7      | 0.159     | 0.504           |
| 3855 | 1-Allyl-3,7-dimethyl-8-p-sulphonylxanthine         | LOPAC   | 2        | A   | 8      | -0.682    | 1.875           |
| 3856 | trans-(±)-ACPD                                     | LOPAC   | 2        | B   | 8      | -0.714    | 0.993           |
| 3857 | Diacylglycerol kinase inhibitor I                  | LOPAC   | 2        | C   | 8      | 0.145     | 1.284           |
| 3858 | 1-Amino-1-cyclohexanecarboxylic acid hydrochloride | LOPAC   | 2        | D   | 8      | 0.099     | 0.511           |
| 3859 | Alaproclate hydrochloride                          | LOPAC   | 2        | E   | 8      | 0.12      | -0.409          |
| 3860 | Psora-4                                            | LOPAC   | 2        | F   | 8      | -0.318    | 0.724           |
| 3861 | SB 200646 hydrochloride                            | LOPAC   | 2        | G   | 8      | -0.627    | 0.958           |
| 3862 | AS-252424                                          | LOPAC   | 2        | H   | 8      | -1.36     | 1.778           |
| 3863 | Acetohexamide                                      | LOPAC   | 2        | A   | 9      | -1.302    | 2.578           |
| 3864 | SKF 89145 hydrobromide                             | LOPAC   | 2        | B   | 9      | -0.217    | -0.580          |
| 3865 | cis-4-Aminocrotonic acid                           | LOPAC   | 2        | C   | 9      | 0.683     | -2.074          |
| 3866 | N6-2,4-Aminophenyl)ethyladenosine                  | LOPAC   | 2        | D   | 9      | -0.087    | -1.383          |
| 3867 | Opipramol dihydrochloride                          | LOPAC   | 2        | E   | 9      | 0.247     | -1.174          |
| 3868 | gamma-Acetylimic GABA                              | LOPAC   | 2        | F   | 9      | -0.095    | -0.075          |
| 3869 | AB-MECA                                            | LOPAC   | 2        | G   | 9      | 0.171     | 0.215           |
| 3870 | Alloxazine                                         | LOPAC   | 2        | H   | 9      | -1.485    | 2.703           |
| 3871 | cis-Azetidine-2,4-dicarboxylic acid                | LOPAC   | 2        | A   | 10     | -0.983    | 0.109           |
| 3872 | trans-Azetidine-2,4-dicarboxylic acid              | LOPAC   | 2        | B   | 10     | -0.538    | 0.081           |
| 3873 | CBLO                                               | LOPAC   | 2        | C   | 10     | 0.36      | 0.064           |
| 3874 | AIDA                                               | LOPAC   | 2        | D   | 10     | 0.142     | -0.7            |
| 3875 | A-77636 hydrochloride                              | LOPAC   | 2        | E   | 10     | -0.604    | -0.134          |
| 3876 | ATPA                                               | LOPAC   | 2        | F   | 10     | 0.143     | -0.318          |
| 3877 | ARL 67156 trisodium salt                           | LOPAC   | 2        | G   | 10     | -0.077    | 0.854           |
| 3878 | Beclomethasone                                     | LOPAC   | 2        | H   | 10     | 0.271     | 1.118           |
| 3879 | 2,3-Butanedione monoxime                           | LOPAC   | 2        | A   | 11     | -0.635    | 0.179           |
| 3880 | SB 222200                                          | LOPAC   | 2        | B   | 11     | 0.095     | -0.718          |
| 3881 | 1-benzoyl-3-methoxy-2-methylindole-3-acetic acid   | LOPAC   | 2        | C   | 11     | 0.311     | 1.048           |
| 3882 | p-Benzoquinone                                     | LOPAC   | 2        | D   | 11     | 0.222     | -0.737          |
| 3883 | 8-Bromo-cGMP sodium                                | LOPAC   | 2        | E   | 11     | 0.18      | 0.449           |
| 3884 | TBBz                                               | LOPAC   | 2        | F   | 11     | -0.352    | 1.349           |
| 3885 | Bromoenoil lactone                                 | LOPAC   | 2        | G   | 11     | -0.753    | 0.391           |
| 3886 | Benzamide                                          | LOPAC   | 2        | H   | 11     | -0.301    | 0.62            |
| 3887 | 3-Bromo-7-nitroindazole                            | LOPAC   | 3        | A   | 2      | -0.198    | 1.012           |
| 3888 | (+)-Bromocriptine methanesulfonate                 | LOPAC   | 3        | B   | 2      | 0.675     | 0.338           |
| 3889 | O6-benzylguanine                                   | LOPAC   | 3        | C   | 2      | 0.203     | 0.377           |
| 3890 | N-Bromoacetamide                                   | LOPAC   | 3        | D   | 2      | 0.243     | 0.369           |
| 3891 | (±)-Brompheniramine maleate                        | LOPAC   | 3        | E   | 2      | 0.112     | 0.273           |
| 3892 | Benzamil hydrochloride                             | LOPAC   | 3        | F   | 2      | 0.143     | 0.273           |
| 3893 | L-Buthionine-sulfoximine                           | LOPAC   | 3        | G   | 2      | 0.284     | 1.148           |
| 3894 | DL-Buthionine-[S,R]-sulfoximine                    | LOPAC   | 3        | H   | 2      | -0.097    | -1.043          |
| 3895 | Bumetanide                                         | LOPAC   | 3        | A   | 3      | -0.418    | -0.003          |
| 3896 | Betaine hydrochloride                              | LOPAC   | 3        | B   | 3      | 0.157     | 0.399           |
| 3897 | Betaine aldehyde chloride                          | LOPAC   | 3        | C   | 3      | 0.123     | 1.358           |
| 3898 | Benzazoline oxalate                                | LOPAC   | 3        | D   | 3      | -0.207    | 1.121           |
| 3899 | BWB70C                                             | LOPAC   | 3        | E   | 3      | 0.177     | 1.039           |
| 3900 | 5-Bromo-2'-deoxyuridine                            | LOPAC   | 3        | F   | 3      | 0.115     | 0.631           |
| 3901 | Bepriidil hydrochloride                            | LOPAC   | 3        | G   | 3      | -0.594    | 1.24            |
| 3902 | (+)-Brompheniramine maleate                        | LOPAC   | 3        | H   | 3      | -0.277    | -0.317          |
| 3903 | (±)-Baclofen                                       | LOPAC   | 3        | A   | 4      | -0.602    | 0.128           |
| 3904 | SB 202190                                          | LOPAC   | 3        | B   | 4      | 0.652     | 0.816           |
| 3905 | Bay 11-7085                                        | LOPAC   | 3        | C   | 4      | 0.274     | 0.56            |
| 3906 | Betaxolol hydrochloride                            | LOPAC   | 3        | D   | 4      | 0.22      | 0.849           |
| 3907 | Benzamide hydrochloride                            | LOPAC   | 3        | E   | 4      | 0.052     | 0.591           |
| 3908 | Betamethasone                                      | LOPAC   | 3        | F   | 4      | 1.203     | -0.118          |
| 3909 | Buspirone hydrochloride                            | LOPAC   | 3        | G   | 4      | -0.147    | 0.631           |
| 3910 | Benserazide hydrochloride                          | LOPAC   | 3        | H   | 4      | -0.839    | -0.21           |
| 3911 | Brefeldin A from Penicillium brefeldianum          | LOPAC   | 3        | A   | 5      | 2.18      | -5.945          |
| 3912 | Budesonide                                         | LOPAC   | 3        | B   | 5      | 1.848     | 0.457           |
| 3913 | 8-Bromo-cAMP sodium                                | LOPAC   | 3        | C   | 5      | 0.144     | 0.286           |
| 3914 | Benzotropine mesylate                              | LOPAC   | 3        | D   | 5      | -0.004    | 0.524           |
| 3915 | Ro 20-1724                                         | LOPAC   | 3        | E   | 5      | 0.101     | 1.218           |
| 3916 | Bestatin hydrochloride                             | LOPAC   | 3        | F   | 5      | 0.154     | 0.459           |
| 3917 | Alfuzosin hydrochloride                            | LOPAC   | 3        | G   | 5      | -0.053    | 0.694           |
| 3918 | BRL 50481                                          | LOPAC   | 3        | H   | 5      | -0.708    | -1.452          |
| 3919 | BP 897                                             | LOPAC   | 3        | A   | 6      | -1.196    | -0.261          |
| 3920 | (E)-5-(2-Bromovinyl)-2'-deoxyuridine               | LOPAC   | 3        | B   | 6      | -0.519    | -0.433          |
| 3921 | BRL 15572                                          | LOPAC   | 3        | C   | 6      | -0.359    | -0.407          |
| 3922 | Chloroethylclonidine dihydrochloride               | LOPAC   | 3        | D   | 6      | -0.187    | 0.134           |
| 3923 | 6-Fluoronorepinephrine hydrochloride               | LOPAC   | 3        | E   | 6      | -0.017    | 0.457           |
| 3924 | Bromoacetyl alprenolol menthane                    | LOPAC   | 3        | F   | 6      | -0.698    | 0.148           |
| 3925 | Benoxathian hydrochloride                          | LOPAC   | 3        | G   | 6      | -0.49     | 0.71            |
| 3926 | Phenoxybenzamine hydrochloride                     | LOPAC   | 3        | H   | 6      | -0.734    | -0.861          |
| 3927 | Bupropion hydrochloride                            | LOPAC   | 3        | A   | 7      | -0.815    | -1.249          |
| 3928 | (-)-Bicuculline methbromide, 1(S), 9(R)            | LOPAC   | 3        | B   | 7      | -0.485    | 0.09            |
| 3929 | (±)-Bay K 8644                                     | LOPAC   | 3        | C   | 7      | -0.31     | -0.398          |
| 3930 | Bromoacetylcholine bromide                         | LOPAC   | 3        | D   | 7      | -0.514    | 0.3             |
| 3931 | BMV 7378 dihydrochloride                           | LOPAC   | 3        | E   | 7      | 0.017     | 1.153           |
| 3932 | R(+)-6-Bromo-APB hydrobromide                      | LOPAC   | 3        | F   | 7      | -0.494    | 1.134           |
| 3933 | BTCP hydrochloride                                 | LOPAC   | 3        | G   | 7      | 0.5       | 1.164           |
| 3934 | DAPH                                               | LOPAC   | 3        | H   | 7      | -0.883    | 1.346           |
| 3935 | BU224 hydrochloride                                | LOPAC   | 3        | A   | 8      | -1.097    | -0.552          |
| 3936 | B-HT 933 dihydrochloride                           | LOPAC   | 3        | B   | 8      | -0.181    | -0.345          |
| 3937 | (±)-Butaclamol hydrochloride                       | LOPAC   | 3        | C   | 8      | 1.045     | -1.551          |
| 3938 | BRL 37344 sodium                                   | LOPAC   | 3        | D   | 8      | -0.076    | 1.274           |
| 3939 | BRL 54443 maleate                                  | LOPAC   | 3        | E   | 8      | 0.004     | 0.853           |

SUPPLEMENTARY DATA

|      | Name                                                             | Library | Plate No | Row | Column | ROS score | viability score |
|------|------------------------------------------------------------------|---------|----------|-----|--------|-----------|-----------------|
| 3940 | Biperiden hydrochloride                                          | LOPAC   | 3        | F   | 8      | 0.354     | -0.307          |
| 3941 | Chlorambucil                                                     | LOPAC   | 3        | G   | 8      | -0.239    | 0.253           |
| 3942 | Supercinnamaldehyde                                              | LOPAC   | 3        | H   | 8      | -1.166    | -0.353          |
| 3943 | Ciprofibrate                                                     | LOPAC   | 3        | A   | 9      | -1.735    | -0.638          |
| 3944 | 6-Chlorometatonin                                                | LOPAC   | 3        | B   | 9      | 0.554     | -0.315          |
| 3945 | Camustine                                                        | LOPAC   | 3        | C   | 9      | 0.417     | -1.073          |
| 3946 | PK 11195                                                         | LOPAC   | 3        | D   | 9      | -0.299    | -0.995          |
| 3947 | Caffeic Acid                                                     | LOPAC   | 3        | E   | 9      | 0.590     | -1.594          |
| 3948 | Cilostazol                                                       | LOPAC   | 3        | F   | 9      | 0.214     | -0.326          |
| 3949 | Caffeine                                                         | LOPAC   | 3        | G   | 9      | -0.288    | -0.498          |
| 3950 | Cyclophosphamide monohydrate                                     | LOPAC   | 3        | H   | 9      | -0.627    | -0.163          |
| 3951 | CGP-7930                                                         | LOPAC   | 3        | A   | 10     | -0.809    | -0.4            |
| 3952 | CGP-13501                                                        | LOPAC   | 3        | B   | 10     | -0.483    | 0.281           |
| 3953 | CP55940                                                          | LOPAC   | 3        | C   | 10     | -0.345    | -0.395          |
| 3954 | L-Cycloserine                                                    | LOPAC   | 3        | D   | 10     | -0.335    | -0.028          |
| 3955 | ML-9                                                             | LOPAC   | 3        | E   | 10     | -0.081    | 0.23            |
| 3956 | (+)-Catechin Hydrate                                             | LOPAC   | 3        | F   | 10     | -0.027    | -0.217          |
| 3957 | Chlorpropamide                                                   | LOPAC   | 3        | G   | 10     | -0.406    | -0.355          |
| 3958 | 1-(4-Chlorobenzyl)-5-methoxy-2-methylindole-3-acetic acid        | LOPAC   | 3        | H   | 10     | -0.327    | -0.188          |
| 3959 | Chlorprothixene hydrochloride                                    | LOPAC   | 3        | A   | 11     | -1.741    | -0.991          |
| 3960 | Choline bromide                                                  | LOPAC   | 3        | B   | 11     | -0.383    | 0.159           |
| 3961 | BTO-1                                                            | LOPAC   | 3        | C   | 11     | -0.44     | -0.952          |
| 3962 | CB 1954                                                          | LOPAC   | 3        | D   | 11     | 0.044     | -1.081          |
| 3963 | S-(+)-PD 123177 trifluoroacetate salt hydrate                    | LOPAC   | 3        | E   | 11     | -0.348    | -1.212          |
| 3964 | Corticosterone                                                   | LOPAC   | 3        | F   | 11     | 0.743     | 0.444           |
| 3965 | Carboplatin                                                      | LOPAC   | 3        | G   | 11     | -0.652    | 0.375           |
| 3966 | Cortisone                                                        | LOPAC   | 3        | H   | 11     | -1.734    | -0.181          |
| 3967 | Chelerythrine chloride                                           | LOPAC   | 4        | A   | 2      | -1.29     | 2.004           |
| 3968 | 1-(2-Chlorophenyl)-1-(4-chlorophenyl)-2,2-dichloroethane         | LOPAC   | 4        | B   | 2      | -0.568    | 0.431           |
| 3969 | (±)-Chlorpheniramine maleate                                     | LOPAC   | 4        | C   | 2      | -0.448    | 0.543           |
| 3970 | Cortisone 21-acetate                                             | LOPAC   | 4        | D   | 2      | -0.097    | 1.032           |
| 3971 | Cephalosporin C zinc salt                                        | LOPAC   | 4        | E   | 2      | 0.089     | 0.756           |
| 3972 | CGP-74514A hydrochloride                                         | LOPAC   | 4        | F   | 2      | 0.083     | 0.431           |
| 3973 | Cyproterone acetate                                              | LOPAC   | 4        | G   | 2      | -0.273    | 0.826           |
| 3974 | DL-p-Chlorophenylalanine methyl ester hydrochloride              | LOPAC   | 4        | H   | 2      | -1.058    | 0.837           |
| 3975 | Cyclosporin A                                                    | LOPAC   | 4        | A   | 3      | 2.79      | -4.54           |
| 3976 | D-Cycloserine                                                    | LOPAC   | 4        | B   | 3      | -0.539    | 0.284           |
| 3977 | 8-(4-Chlorophenylthio)-cAMP sodium                               | LOPAC   | 4        | C   | 3      | 0.218     | 0.424           |
| 3978 | Calmidazolium chloride                                           | LOPAC   | 4        | D   | 3      | -0.073    | 1.104           |
| 3979 | GR 113808                                                        | LOPAC   | 4        | E   | 3      | 0.144     | 0.442           |
| 3980 | Carbamazepine                                                    | LOPAC   | 4        | F   | 3      | -0.117    | 0.539           |
| 3981 | Captopril                                                        | LOPAC   | 4        | G   | 3      | -0.152    | 0.391           |
| 3982 | CNS-1102                                                         | LOPAC   | 4        | H   | 3      | -1.227    | 0.893           |
| 3983 | Carbachol                                                        | LOPAC   | 4        | A   | 4      | -0.727    | -0.204          |
| 3984 | Chlorzoxazone                                                    | LOPAC   | 4        | B   | 4      | 0.022     | -0.093          |
| 3985 | L-Cysteinesulfonic Acid                                          | LOPAC   | 4        | C   | 4      | 0.278     | -0.036          |
| 3986 | 9-cyclopentyladenine                                             | LOPAC   | 4        | D   | 4      | 0.012     | 0.251           |
| 3987 | Cephalothin sodium                                               | LOPAC   | 4        | E   | 4      | -0.186    | 0.251           |
| 3988 | Cimetidine                                                       | LOPAC   | 4        | F   | 4      | 0.084     | 0.052           |
| 3989 | Cyclobenzaprine hydrochloride                                    | LOPAC   | 4        | G   | 4      | -0.15     | 0.009           |
| 3990 | Carbetapentane citrate                                           | LOPAC   | 4        | H   | 4      | -0.921    | 0.203           |
| 3991 | Cephalexin hydrate                                               | LOPAC   | 4        | A   | 5      | -0.737    | 0.428           |
| 3992 | Chlorothiazide                                                   | LOPAC   | 4        | B   | 5      | 0.228     | 0.047           |
| 3993 | (±)-Chlorpheniramine maleate                                     | LOPAC   | 4        | C   | 5      | 0.062     | 0.14            |
| 3994 | Cefazolin sodium                                                 | LOPAC   | 4        | D   | 5      | 0.137     | 0.104           |
| 3995 | Clemizole hydrochloride                                          | LOPAC   | 4        | E   | 5      | 0.091     | 0.54            |
| 3996 | 2-Chloroadenosine                                                | LOPAC   | 4        | F   | 5      | 0.039     | 0.431           |
| 3997 | Bethanechol chloride                                             | LOPAC   | 4        | G   | 5      | -0.553    | -0.15           |
| 3998 | Cinnarizine                                                      | LOPAC   | 4        | H   | 5      | -0.253    | 0.527           |
| 3999 | Roscovitine                                                      | LOPAC   | 4        | A   | 6      | -0.739    | 0.539           |
| 4000 | SB 204741                                                        | LOPAC   | 4        | B   | 6      | -0.22     | 0.386           |
| 4001 | Ceftriaxone sodium                                               | LOPAC   | 4        | C   | 6      | -0.591    | 0.574           |
| 4002 | 4-Chloromercuribenzoic acid                                      | LOPAC   | 4        | D   | 6      | -0.488    | 0.33            |
| 4003 | (-)-Cobinamide                                                   | LOPAC   | 4        | E   | 6      | -0.309    | 0               |
| 4004 | CL 316.243                                                       | LOPAC   | 4        | F   | 6      | -0.557    | 0.303           |
| 4005 | 7-Chloro-4-hydroxy-2-phenyl-1,8-naphthyridine                    | LOPAC   | 4        | G   | 6      | -0.776    | -0.216          |
| 4006 | Clotrimazole                                                     | LOPAC   | 4        | H   | 6      | -0.895    | -0.04           |
| 4007 | Cyproheptadine hydrochloride                                     | LOPAC   | 4        | A   | 7      | -0.245    | 0.596           |
| 4008 | GR 79236X                                                        | LOPAC   | 4        | B   | 7      | 0.177     | -0.605          |
| 4009 | Cefmetazole sodium                                               | LOPAC   | 4        | C   | 7      | 0.08      | -0.292          |
| 4010 | Clozapine                                                        | LOPAC   | 4        | D   | 7      | 0.048     | 0.143           |
| 4011 | (±)-p-Chlorophenylalanine                                        | LOPAC   | 4        | E   | 7      | 0.031     | -0.252          |
| 4012 | Chloroquine diphosphate                                          | LOPAC   | 4        | F   | 7      | -0.111    | 0.234           |
| 4013 | Clofibrate                                                       | LOPAC   | 4        | G   | 7      | -0.181    | -0.203          |
| 4014 | Cytosine-1-beta-D-arabinofuranoside hydrochloride                | LOPAC   | 4        | H   | 7      | -0.415    | -0.029          |
| 4015 | 3-Morpholinolinosydnonimine hydrochloride                        | LOPAC   | 4        | A   | 8      | -1.188    | 0.596           |
| 4016 | Cefaclor                                                         | LOPAC   | 4        | B   | 8      | -0.446    | -0.034          |
| 4017 | DL-Cycloserine                                                   | LOPAC   | 4        | C   | 8      | -0.067    | 0.188           |
| 4018 | McN-A-343                                                        | LOPAC   | 4        | D   | 8      | 0.382     | -0.172          |
| 4019 | N-(2-(4-(4-Chlorophenyl)piperazin-1-yl)ethyl)-3-methoxybenzamide | LOPAC   | 4        | E   | 8      | 0.416     | -0.139          |
| 4020 | Cystamine dihydrochloride                                        | LOPAC   | 4        | F   | 8      | 0.488     | -0.123          |
| 4021 | Clomipramine hydrochloride                                       | LOPAC   | 4        | G   | 8      | -0.136    | 0.244           |
| 4022 | Calcimycin                                                       | LOPAC   | 4        | H   | 8      | 2.801     | -4.253          |
| 4023 | Cantharidin                                                      | LOPAC   | 4        | A   | 9      | 1.48      | -3.3            |
| 4024 | Citalopram hydrobromide                                          | LOPAC   | 4        | B   | 9      | -0.804    | 0.409           |
| 4025 | Clonidine hydrochloride                                          | LOPAC   | 4        | C   | 9      | -0.116    | 0.283           |
| 4026 | Cefotaxime sodium                                                | LOPAC   | 4        | D   | 9      | -0.356    | 0.407           |
| 4027 | Cilostamide                                                      | LOPAC   | 4        | E   | 9      | 0.178     | 0.451           |
| 4028 | Chelidamic acid                                                  | LOPAC   | 4        | F   | 9      | -0.125    | 0.574           |
| 4029 | NE-Cyclopentyladenosine                                          | LOPAC   | 4        | G   | 9      | -0.517    | 0.277           |
| 4030 | Cantharidic Acid                                                 | LOPAC   | 4        | H   | 9      | 1.643     | -3.097          |
| 4031 | Chlorpromazine hydrochloride                                     | LOPAC   | 4        | A   | 10     | -1.635    | 0.322           |
| 4032 | Cefsulodin sodium salt hydrate                                   | LOPAC   | 4        | B   | 10     | -0.546    | 0.005           |
| 4033 | Caffeic acid phenethyl ester                                     | LOPAC   | 4        | C   | 10     | 0.276     | -0.887          |
| 4034 | Imipenem monohydrate                                             | LOPAC   | 4        | D   | 10     | -0.106    | 0.002           |
| 4035 | Cephradine                                                       | LOPAC   | 4        | E   | 10     | 0.041     | -0.038          |
| 4036 | DSP-4 hydrochloride                                              | LOPAC   | 4        | F   | 10     | 0.036     | 0.385           |
| 4037 | Cinoxacin                                                        | LOPAC   | 4        | G   | 10     | -0.534    | 0.488           |
| 4038 | Carisoprodol                                                     | LOPAC   | 4        | H   | 10     | -0.47     | 0.072           |
| 4039 | Centrophoxine hydrochloride                                      | LOPAC   | 4        | A   | 11     | -0.843    | -0.852          |
| 4040 | Clemastine fumarate                                              | LOPAC   | 4        | B   | 11     | 0.258     | -0.726          |
| 4041 | beta-Chloro-L-alanine hydrochloride                              | LOPAC   | 4        | C   | 11     | 0.375     | -0.531          |
| 4042 | Pyrocatechol                                                     | LOPAC   | 4        | D   | 11     | 0.256     | -0.83           |
| 4043 | Z-L-Phe chloromethyl ketone                                      | LOPAC   | 4        | E   | 11     | -0.118    | -0.294          |
| 4044 | CPCCOEt                                                          | LOPAC   | 4        | F   | 11     | -0.345    | 0.062           |

SUPPLEMENTARY DATA

|      | Name                                                             | Library | Plate No | Row | Column | ROS score | viability score |
|------|------------------------------------------------------------------|---------|----------|-----|--------|-----------|-----------------|
| 4045 | Colchicine                                                       | LOPAC   | 4        | G   | 11     | 0.82      | -0.987          |
| 4046 | L-Canavanine sulfate                                             | LOPAC   | 4        | H   | 11     | -0.741    | 0.734           |
| 4047 | Cyclothiazide                                                    | LOPAC   | 5        | A   | 2      | -1.037    | 0.181           |
| 4048 | N6-Cyclohexyladenosine                                           | LOPAC   | 5        | B   | 2      | -1.051    | 0.838           |
| 4049 | (S)-(+)-Camptothecin                                             | LOPAC   | 5        | C   | 2      | 0.523     | -2.205          |
| 4050 | CK2 Inhibitor 2                                                  | LOPAC   | 5        | D   | 2      | -0.257    | 0.334           |
| 4051 | Ebastine                                                         | LOPAC   | 5        | E   | 2      | -0.217    | -0.017          |
| 4052 | OXA-22                                                           | LOPAC   | 5        | F   | 2      | -0.073    | -0.28           |
| 4053 | 8-Cyclopentyl-1,3-dipropylxanthine                               | LOPAC   | 5        | G   | 2      | 0.088     | 0.083           |
| 4054 | 8-Cyclopentyl-1,3-dimethylxanthine                               | LOPAC   | 5        | H   | 2      | -0.708    | 0.824           |
| 4055 | (±)-CPP                                                          | LOPAC   | 5        | A   | 3      | -1.503    | 0.23            |
| 4056 | CGS-12065A maleate                                               | LOPAC   | 5        | B   | 3      | 0.00      | 0.848           |
| 4057 | 2-Cyclooctyl-2-hydroxyethylamine hydrochloride                   | LOPAC   | 5        | C   | 3      | -2.255    | 0.572           |
| 4058 | 5-Carboxamidotryptamine maleate                                  | LOPAC   | 5        | D   | 3      | -0.053    | 0.405           |
| 4059 | Cetizine dihydrochloride                                         | LOPAC   | 5        | E   | 3      | -0.045    | -0.288          |
| 4060 | (±)-CGP-12177A hydrochloride                                     | LOPAC   | 5        | F   | 3      | 0.104     | -0.351          |
| 4061 | S-(+)-Carbidopa                                                  | LOPAC   | 5        | G   | 3      | -0.271    | -0.255          |
| 4062 | (±)-Chloro-APB hydrobromide                                      | LOPAC   | 5        | H   | 3      | -0.988    | 0.005           |
| 4063 | CGS-21680 hydrochloride                                          | LOPAC   | 5        | A   | 4      | -1.322    | 0.15            |
| 4064 | Y-27632 dihydrochloride                                          | LOPAC   | 5        | B   | 4      | -0.402    | 0.184           |
| 4065 | 1-(m-Chlorophenyl)-biguanide hydrochloride                       | LOPAC   | 5        | C   | 4      | -0.478    | 0.455           |
| 4066 | 2-Chloroadenosine triphosphate tetrasodium                       | LOPAC   | 5        | D   | 4      | -0.223    | 0.504           |
| 4067 | (±)-Cyclazocine                                                  | LOPAC   | 5        | E   | 4      | 0.377     | 0.018           |
| 4068 | Capsazepine                                                      | LOPAC   | 5        | F   | 4      | -0.044    | 0.411           |
| 4069 | Chlormezanone                                                    | LOPAC   | 5        | G   | 4      | 0.155     | 0.287           |
| 4070 | 8-(3-Chlorostyryl)caffeine                                       | LOPAC   | 5        | H   | 4      | -0.439    | 1.133           |
| 4071 | CGS-15343                                                        | LOPAC   | 5        | A   | 5      | -0.377    | 1.181           |
| 4072 | 2-Chloro-2-deoxy-D-glucose                                       | LOPAC   | 5        | B   | 5      | -0.308    | -0.145          |
| 4073 | Tocainide hydrochloride                                          | LOPAC   | 5        | C   | 5      | -0.031    | 0.202           |
| 4074 | Cirazoline hydrochloride                                         | LOPAC   | 5        | D   | 5      | -0.050    | 0.432           |
| 4075 | CGP 20712A methanesulfonate                                      | LOPAC   | 5        | E   | 5      | 0.002     | 0.382           |
| 4076 | (2S,1'S,2'S)-2-(carboxycyclopropyl)glycine                       | LOPAC   | 5        | F   | 5      | 0.256     | -0.020          |
| 4077 | GNOX disodium                                                    | LOPAC   | 5        | G   | 5      | -0.073    | -0.032          |
| 4078 | CX 548                                                           | LOPAC   | 5        | H   | 5      | -1.077    | 0.421           |
| 4079 | Chloro-IB-MECA                                                   | LOPAC   | 5        | A   | 6      | -0.844    | 1.289           |
| 4080 | WB-4101 hydrochloride                                            | LOPAC   | 5        | B   | 6      | -0.225    | 0.48            |
| 4081 | DNQX                                                             | LOPAC   | 5        | C   | 6      | 0.102     | 0.368           |
| 4082 | Dihydroouabain                                                   | LOPAC   | 5        | D   | 6      | -0.384    | 0.901           |
| 4083 | Dobutamine hydrochloride                                         | LOPAC   | 5        | E   | 6      | -0.273    | -0.144          |
| 4084 | Dihydrokanic acid                                                | LOPAC   | 5        | F   | 6      | 0.085     | -0.134          |
| 4085 | Decamethonium dibromide                                          | LOPAC   | 5        | G   | 6      | 0.334     | 0.223           |
| 4086 | P1,P4-Di(adenosine-5')tetraphosphate triammonium                 | LOPAC   | 5        | H   | 6      | -0.526    | 0.37            |
| 4087 | Debrisoquin sulfate                                              | LOPAC   | 5        | A   | 7      | -0.612    | 0.801           |
| 4088 | 2',3'-didehydro-3'-deoxythymidine                                | LOPAC   | 5        | B   | 7      | -0.418    | 0.949           |
| 4089 | Droperidol                                                       | LOPAC   | 5        | C   | 7      | 0.166     | 0.852           |
| 4090 | L-3,4-Dihydroxyphenylalanine methyl ester hydrochloride          | LOPAC   | 5        | D   | 7      | -0.099    | 0.51            |
| 4091 | 1,4-Dideoxy-1,4-imino-D-arabinitol                               | LOPAC   | 5        | E   | 7      | 0.041     | 0.387           |
| 4092 | N-Acetyl-2,3-dihydro-2-deoxyneuraminic acid                      | LOPAC   | 5        | F   | 7      | 0.105     | 0.032           |
| 4093 | O-ribofuranosylbenzimidazole                                     | LOPAC   | 5        | G   | 7      | -0.256    | 0.28            |
| 4094 | SANT-1                                                           | LOPAC   | 5        | H   | 7      | -0.16     | 1.074           |
| 4095 | Diltiazem hydrochloride                                          | LOPAC   | 5        | A   | 8      | -0.311    | 1.386           |
| 4096 | Dextromethorphan hydrobromide monohydrate                        | LOPAC   | 5        | B   | 8      | 0         | 0.080           |
| 4097 | Carvedilol                                                       | LOPAC   | 5        | C   | 8      | -0.372    | -0.102          |
| 4098 | Dihydroergotamine methanesulfonate                               | LOPAC   | 5        | D   | 8      | -0.288    | 0.321           |
| 4099 | Diphenyleiiodonium chloride                                      | LOPAC   | 5        | E   | 8      | 2.191     | -4.395          |
| 4100 | Diphenhydramine hydrochloride                                    | LOPAC   | 5        | F   | 8      | 0.174     | -0.779          |
| 4101 | 2,3-Butanedione                                                  | LOPAC   | 5        | G   | 8      | 0.221     | 0.353           |
| 4102 | N,N,N',N'-Tetramethylazodicarboxamide                            | LOPAC   | 5        | H   | 8      | -0.547    | 0.48            |
| 4103 | (S)-3,5-Dihydroxyphenylglycine                                   | LOPAC   | 5        | A   | 9      | -0.48     | -0.391          |
| 4104 | Dequalinium chloride hydrate                                     | LOPAC   | 5        | B   | 9      | 2.848     | -4.872          |
| 4105 | Doxylamine succinate                                             | LOPAC   | 5        | C   | 9      | 0.29      | -0.485          |
| 4106 | Desipramine hydrochloride                                        | LOPAC   | 5        | D   | 9      | 0.055     | -0.904          |
| 4107 | N-Methyl-1-deoxynojirimycin                                      | LOPAC   | 5        | E   | 9      | 0.521     | -1.452          |
| 4108 | 5,5-Diphenylhydantoin                                            | LOPAC   | 5        | F   | 9      | 0.873     | -2.08           |
| 4109 | N <sup>α</sup> G,N <sup>α</sup> G-Dimethylarginine hydrochloride | LOPAC   | 5        | G   | 9      | 0.027     | -0.99           |
| 4110 | Citronic acid                                                    | LOPAC   | 5        | H   | 9      | 0.157     | -1.215          |
| 4111 | Phenytoin sodium                                                 | LOPAC   | 5        | A   | 10     | -0.704    | -0.004          |
| 4112 | Doxepin hydrochloride                                            | LOPAC   | 5        | B   | 10     | -0.323    | -0.373          |
| 4113 | (S)-Pindolol                                                     | LOPAC   | 5        | C   | 10     | -0.16     | -0.737          |
| 4114 | (-)-alpha-Methylnorepinephrine                                   | LOPAC   | 5        | D   | 10     | -0.633    | 0.221           |
| 4115 | Dilazep hydrochloride                                            | LOPAC   | 5        | E   | 10     | -0.188    | 0.148           |
| 4116 | Ganaxalone                                                       | LOPAC   | 5        | F   | 10     | -0.348    | -0.308          |
| 4117 | 1,7-Dimethylxanthine                                             | LOPAC   | 5        | G   | 10     | -0.853    | -0.589          |
| 4118 | 2,3-Dimethoxy-1,4-naphthoquinone                                 | LOPAC   | 5        | H   | 10     | -1.342    | 0.883           |
| 4119 | Daphnetin                                                        | LOPAC   | 5        | A   | 11     | -0.199    | 0.335           |
| 4120 | DM 235                                                           | LOPAC   | 5        | B   | 11     | 0.183     | -0.048          |
| 4121 | 5,5-Dimethyl-1-pyrroline-N-oxide                                 | LOPAC   | 5        | C   | 11     | 0.388     | -0.195          |
| 4122 | 2',3'-dideoxycytidine                                            | LOPAC   | 5        | D   | 11     | 0.003     | 0.778           |
| 4123 | Diacylglycerol Kinase Inhibitor II                               | LOPAC   | 5        | E   | 11     | -0.197    | 0.385           |
| 4124 | Cambinol                                                         | LOPAC   | 5        | F   | 11     | 0.388     | -0.658          |
| 4125 | N-Methyldopamine hydrochloride                                   | LOPAC   | 5        | G   | 11     | -0.587    | -0.254          |
| 4126 | 1,1-Dimethyl-4-phenyl-piperazinium iodide                        | LOPAC   | 5        | H   | 11     | -0.9      | 1.014           |
| 4127 | PD 169316                                                        | LOPAC   | 6        | A   | 2      | -0.742    | 1.155           |
| 4128 | Disopyramide phosphate                                           | LOPAC   | 6        | B   | 2      | -0.248    | -0.473          |
| 4129 | Demeclocycline hydrochloride                                     | LOPAC   | 6        | C   | 2      | 0.085     | 0.026           |
| 4130 | Diethylenetriaminepentaacetic acid                               | LOPAC   | 6        | D   | 2      | -0.288    | 0.304           |
| 4131 | Diclofenac sodium                                                | LOPAC   | 6        | E   | 2      | -0.208    | -0.194          |
| 4132 | DL-erythro-Dihydrospingosine                                     | LOPAC   | 6        | F   | 2      | -0.488    | -0.078          |
| 4133 | R(-)-Desmethyldiprenyl hydrochloride                             | LOPAC   | 6        | G   | 2      | -0.622    | 0.387           |
| 4134 | 2,2'-Bipyridyl                                                   | LOPAC   | 6        | H   | 2      | -1.296    | 0.239           |
| 4135 | Disopyramide                                                     | LOPAC   | 6        | A   | 3      | -0.83     | 0.624           |
| 4136 | Daidzein                                                         | LOPAC   | 6        | B   | 3      | -0.127    | 0.558           |
| 4137 | Cilnidipine                                                      | LOPAC   | 6        | C   | 3      | -0.153    | 0.843           |
| 4138 | Dicyclimine hydrochloride                                        | LOPAC   | 6        | D   | 3      | 0.127     | 1.041           |
| 4139 | 3,4-Dichloroisocoumarin                                          | LOPAC   | 6        | E   | 3      | 0.18      | 1.025           |
| 4140 | DIBO-83                                                          | LOPAC   | 6        | F   | 3      | 0.38      | 1.495           |
| 4141 | 7,7-Dimethyl-(5Z,8Z)-eicosadienoic acid                          | LOPAC   | 6        | G   | 3      | 0.329     | 1.435           |
| 4142 | (±) trans-U-50488 methanesulfonate                               | LOPAC   | 6        | H   | 3      | -1.182    | 0.342           |
| 4143 | Dephostatin                                                      | LOPAC   | 6        | A   | 4      | -1.119    | 0.289           |
| 4144 | Imperatorin                                                      | LOPAC   | 6        | B   | 4      | -0.286    | -0.607          |
| 4145 | 3-deazaadenosine                                                 | LOPAC   | 6        | C   | 4      | -0.135    | 0.698           |
| 4146 | Cytidine 5'-diphosphocholine sodium salt hydrate                 | LOPAC   | 6        | D   | 4      | -0.08     | -0.041          |
| 4147 | Danazol                                                          | LOPAC   | 6        | E   | 4      | 0.262     | 0.498           |
| 4148 | N,N-Dihexyl-2-(4-fluorophenyl)indole-3-acetamide                 | LOPAC   | 6        | F   | 4      | -0.271    | 0.304           |
| 4149 | (R,R)-cis-Diethyl tetrahydro-2,8-chrysenediol                    | LOPAC   | 6        | G   | 4      | 0.073     | 1.927           |



SUPPLEMENTARY DATA

|      | Name                                                                   | Library | Plate No | Row | Column | ROS score | viability score |
|------|------------------------------------------------------------------------|---------|----------|-----|--------|-----------|-----------------|
| 4150 | SP600125                                                               | LOPAC   | 6        | H   | 4      | -0.783    | 0.448           |
| 4151 | Diazoxide                                                              | LOPAC   | 6        | A   | 5      | -0.928    | 1.105           |
| 4152 | 3,4-Dihydroxyphenylacetic acid                                         | LOPAC   | 6        | B   | 5      | -0.484    | 0.604           |
| 4153 | Dantrolene sodium                                                      | LOPAC   | 6        | C   | 5      | -0.429    | 0.621           |
| 4154 | DCEBIO                                                                 | LOPAC   | 6        | D   | 5      | -0.019    | 0.609           |
| 4155 | 1-Deoxynojirimycin hydrochloride                                       | LOPAC   | 6        | E   | 5      | -0.119    | 0.713           |
| 4156 | L-3,4-Dihydroxyphenylalanine                                           | LOPAC   | 6        | F   | 5      | -0.545    | 0.962           |
| 4157 | Dipyridamole                                                           | LOPAC   | 6        | G   | 5      | 0.324     | 0.945           |
| 4158 | Doxazosin mesylate                                                     | LOPAC   | 6        | H   | 5      | -1.057    | 1.463           |
| 4159 | Doxycycline hydrochloride                                              | LOPAC   | 6        | A   | 6      | -0.884    | 0.288           |
| 4160 | 6,7-ADTN hydrobromide                                                  | LOPAC   | 6        | B   | 6      | -0.254    | 0.592           |
| 4161 | R(-)-Apocodine hydrochloride                                           | LOPAC   | 6        | C   | 6      | 0.408     | 0.1             |
| 4162 | R(+)-Propylorapomorphine hydrochloride                                 | LOPAC   | 6        | D   | 6      | -0.098    | 0.389           |
| 4163 | R(-)-2,10,11-Trihydroxyaporphine hydrobromide                          | LOPAC   | 6        | E   | 6      | -0.139    | -0.395          |
| 4164 | R(+)-2,10,11-Trihydroxy-N-propyloraporphine hydrobromide               | LOPAC   | 6        | F   | 6      | -0.278    | 0.295           |
| 4165 | Dipropylidopamine hydrobromide                                         | LOPAC   | 6        | G   | 6      | -0.561    | 0.338           |
| 4166 | AC-93253 iodide                                                        | LOPAC   | 6        | H   | 6      | ?????     | -2.898          |
| 4167 | R(+)-N-Allylorapomorphine hydrobromide                                 | LOPAC   | 6        | A   | 7      | -0.388    | 0.084           |
| 4168 | Mephetyl tetrazole                                                     | LOPAC   | 6        | B   | 7      | 0.267     | 0.128           |
| 4169 | Icilin                                                                 | LOPAC   | 6        | C   | 7      | 0.799     | 0.008           |
| 4170 | (±)-SKF-38393 hydrochloride                                            | LOPAC   | 6        | D   | 7      | 0.374     | 0.248           |
| 4171 | GBR-12909 dihydrochloride                                              | LOPAC   | 6        | E   | 7      | 0.384     | -1.165          |
| 4172 | R(+)-SCH-23390 hydrochloride                                           | LOPAC   | 6        | F   | 7      | 0.232     | -0.284          |
| 4173 | (±)-DOI hydrochloride                                                  | LOPAC   | 6        | G   | 7      | -0.08     | -0.318          |
| 4174 | (±)-2,3-Dichloro- $\alpha$ -methylbenzylamine hydrochloride            | LOPAC   | 6        | H   | 7      | -5.194    | 1.305           |
| 4175 | 4-DAMP methiodide                                                      | LOPAC   | 6        | A   | 8      | -0.565    | -0.466          |
| 4176 | 1,3-Dipropyl-7-methylxanthine                                          | LOPAC   | 6        | B   | 8      | 0.338     | -0.569          |
| 4177 | Domperidone                                                            | LOPAC   | 6        | C   | 8      | 1.065     | -1.294          |
| 4178 | Propofol                                                               | LOPAC   | 6        | D   | 8      | 0.551     | -1.197          |
| 4179 | Neiracetam                                                             | LOPAC   | 6        | E   | 8      | 0.356     | -1.794          |
| 4180 | R(+)-Butylindazone                                                     | LOPAC   | 6        | F   | 8      | 0.833     | 0.052           |
| 4181 | Elorodil                                                               | LOPAC   | 6        | G   | 8      | -0.148    | 0.271           |
| 4182 | 3,5-Dinitrocatechol                                                    | LOPAC   | 6        | H   | 8      | -2.201    | 1.079           |
| 4183 | N,N-Dipropyl-5-carboxamidotryptamine maleate                           | LOPAC   | 6        | A   | 9      | -0.482    | -0.325          |
| 4184 | D(-)-2-Amino-5-phosphopentanoic acid                                   | LOPAC   | 6        | B   | 9      | 0.462     | -1.295          |
| 4185 | 3,7-Dimethyl-1-propargylxanthine                                       | LOPAC   | 6        | C   | 9      | 0.437     | -1.122          |
| 4186 | 5,7-Dichlorokynurenic acid                                             | LOPAC   | 6        | D   | 9      | 0.22      | -1.044          |
| 4187 | N-Desmethylclozapine                                                   | LOPAC   | 6        | E   | 9      | 0.32      | -1.03           |
| 4188 | 1,10-Diaminodecane                                                     | LOPAC   | 6        | F   | 9      | 0.587     | 0.124           |
| 4189 | Dihydro-beta-erythroidine hydrobromide                                 | LOPAC   | 6        | G   | 9      | 0.099     | 0.29            |
| 4190 | AL-8810                                                                | LOPAC   | 6        | H   | 9      | -1.282    | 0.517           |
| 4191 | Anisotropine methyl bromide                                            | LOPAC   | 6        | A   | 10     | -0.695    | 0.22            |
| 4192 | 2,4-Diamino-6-pyrimidinone                                             | LOPAC   | 6        | B   | 10     | 0.15      | -0.508          |
| 4193 | DL- $\alpha$ -Difluoromethylomithine hydrochloride                     | LOPAC   | 6        | C   | 10     | 0.497     | -1.529          |
| 4194 | SCH-28080                                                              | LOPAC   | 6        | D   | 10     | 0.206     | -0.168          |
| 4195 | Venlafaxine hydrochloride                                              | LOPAC   | 6        | E   | 10     | 0.374     | -0.269          |
| 4196 | Vanillic acid diethylamide                                             | LOPAC   | 6        | F   | 10     | 0.45      | 0.84            |
| 4197 | Epibestatin hydrochloride                                              | LOPAC   | 6        | G   | 10     | 0.038     | 1.132           |
| 4198 | Etodolac                                                               | LOPAC   | 6        | H   | 10     | -0.439    | -1.494          |
| 4199 | Enoximone                                                              | LOPAC   | 6        | A   | 11     | -0.664    | -1.08           |
| 4200 | Etoposide                                                              | LOPAC   | 6        | B   | 11     | 0.307     | -0.909          |
| 4201 | ET-18-OCH3                                                             | LOPAC   | 6        | C   | 11     | 0.523     | -0.972          |
| 4202 | Etazolate hydrochloride                                                | LOPAC   | 6        | D   | 11     | 0.911     | -0.46           |
| 4203 | 7-Cyclopentyl-5-(4-phenoxy)phenyl-7H-pyrrolo[2,3-d]pyrimidin-4-ylamine | LOPAC   | 6        | E   | 11     | 0.819     | -2.803          |
| 4204 | Emetine dihydrochloride hydrate                                        | LOPAC   | 6        | F   | 11     | 1.7       | -3.598          |
| 4205 | 9'-N-Ethylcarboxamidoadenosine                                         | LOPAC   | 6        | G   | 11     | -0.071    | 0.763           |
| 4206 | E-64                                                                   | LOPAC   | 6        | H   | 11     | -0.753    | 0.128           |
| 4207 | SB 415286                                                              | LOPAC   | 7        | A   | 2      | -0.472    | 1.589           |
| 4208 | S-Ethylisothiurea hydrobromide                                         | LOPAC   | 7        | B   | 2      | -0.39     | 2.088           |
| 4209 | Epinastine hydrochloride                                               | LOPAC   | 7        | C   | 2      | -0.199    | 1.278           |
| 4210 | Edrophonium chloride                                                   | LOPAC   | 7        | D   | 2      | -0.26     | 1.842           |
| 4211 | Efaroxan hydrochloride                                                 | LOPAC   | 7        | E   | 2      | -0.402    | 1.772           |
| 4212 | Ellipticine                                                            | LOPAC   | 7        | F   | 2      | 0.281     | 1.669           |
| 4213 | Ebselen                                                                | LOPAC   | 7        | G   | 2      | -0.55     | 1.369           |
| 4214 | GW508                                                                  | LOPAC   | 7        | H   | 2      | -1.076    | 1.682           |
| 4215 | Staurosporine aglycone                                                 | LOPAC   | 7        | A   | 3      | -0.873    | 2.456           |
| 4216 | N-Ethylmaleimide                                                       | LOPAC   | 7        | B   | 3      | 0.394     | -0.433          |
| 4217 | (-)-Epinephrine bitartrate                                             | LOPAC   | 7        | C   | 3      | -0.119    | -1.213          |
| 4218 | EGTA                                                                   | LOPAC   | 7        | D   | 3      | 0.311     | -0.062          |
| 4219 | (±)-Epinephrine hydrochloride                                          | LOPAC   | 7        | E   | 3      | 0.305     | -0.063          |
| 4220 | Ethosuximide                                                           | LOPAC   | 7        | F   | 3      | 0.883     | -2.431          |
| 4221 | JX401                                                                  | LOPAC   | 7        | G   | 3      | 0.744     | -1.103          |
| 4222 | Emodin                                                                 | LOPAC   | 7        | H   | 3      | -0.496    | -0.004          |
| 4223 | (-)-Physostigmine                                                      | LOPAC   | 7        | A   | 4      | -1.26     | 0.848           |
| 4224 | NBI 27914                                                              | LOPAC   | 7        | B   | 4      | -0.877    | 1.358           |
| 4225 | beta-Estradiol                                                         | LOPAC   | 7        | C   | 4      | -0.012    | 0.605           |
| 4226 | Estrone                                                                | LOPAC   | 7        | D   | 4      | -0.418    | 1.512           |
| 4227 | Phenserine                                                             | LOPAC   | 7        | E   | 4      | -0.709    | 0.161           |
| 4228 | N-Methyl-beta-carboline-3-carboxamide                                  | LOPAC   | 7        | F   | 4      | 0.704     | 0.719           |
| 4229 | DFO-1                                                                  | LOPAC   | 7        | G   | 4      | -0.16     | 1.039           |
| 4230 | (-)-Eseroline fumarate                                                 | LOPAC   | 7        | H   | 4      | -1.762    | 0.965           |
| 4231 | S(-)-Eticlopride hydrochloride                                         | LOPAC   | 7        | A   | 5      | -1.162    | 0.849           |
| 4232 | Tamoxifen                                                              | LOPAC   | 7        | B   | 5      | -0.393    | 1.654           |
| 4233 | erythro-9-[2-Hydroxy-3-nonyl]adenine hydrochloride                     | LOPAC   | 7        | C   | 5      | -0.084    | 0.208           |
| 4234 | Alinidine                                                              | LOPAC   | 7        | D   | 5      | 0.142     | 0.859           |
| 4235 | Felbamate                                                              | LOPAC   | 7        | E   | 5      | 0.445     | -0.561          |
| 4236 | Fusidic acid sodium                                                    | LOPAC   | 7        | F   | 5      | 0.703     | -1.93           |
| 4237 | Fenoterol hydrobromide                                                 | LOPAC   | 7        | G   | 5      | -0.256    | -0.822          |
| 4238 | S(+)-Fluoxetine hydrochloride                                          | LOPAC   | 7        | H   | 5      | -0.598    | -0.345          |
| 4239 | UCL 2077                                                               | LOPAC   | 7        | A   | 6      | -0.647    | 0.069           |
| 4240 | Fluvoxamine maleate                                                    | LOPAC   | 7        | B   | 6      | 0.133     | -0.139          |
| 4241 | AS 604850                                                              | LOPAC   | 7        | C   | 6      | 0.59      | -1.43           |
| 4242 | Furegrelate sodium                                                     | LOPAC   | 7        | D   | 6      | -0.04     | 0.301           |
| 4243 | Fiduxosin hydrochloride                                                | LOPAC   | 7        | E   | 6      | 0.304     | -0.005          |
| 4244 | Furosemide                                                             | LOPAC   | 7        | F   | 6      | 0.406     | -1.398          |
| 4245 | p-Fluoro-L-phenylalanine                                               | LOPAC   | 7        | G   | 6      | -0.318    | -0.612          |
| 4246 | Fluphenazine dihydrochloride                                           | LOPAC   | 7        | H   | 6      | -0.788    | -0.317          |
| 4247 | Fenofibrate                                                            | LOPAC   | 7        | A   | 7      | -0.823    | 0.576           |
| 4248 | Fenspiride hydrochloride                                               | LOPAC   | 7        | B   | 7      | -0.516    | 0.272           |
| 4249 | Flumazenil                                                             | LOPAC   | 7        | C   | 7      | -0.062    | 0.117           |
| 4250 | Genipin                                                                | LOPAC   | 7        | D   | 7      | -0.015    | -0.275          |
| 4251 | Fusaric acid                                                           | LOPAC   | 7        | E   | 7      | 0.594     | -1.961          |
| 4252 | 5-Fluorouracil                                                         | LOPAC   | 7        | F   | 7      | 0.262     | -0.297          |
| 4253 | Esomeprazole magnesium dihydrate                                       | LOPAC   | 7        | G   | 7      | -0.162    | 0.088           |
| 4254 | Fenoldopam bromide                                                     | LOPAC   | 7        | H   | 7      | -0.926    | 0.115           |

SUPPLEMENTARY DATA

|      | Name                                                    | Library | Plate No | Row | Column | ROS score | viability score |
|------|---------------------------------------------------------|---------|----------|-----|--------|-----------|-----------------|
| 4255 | Forskolin                                               | LOPAC   | 7        | A   | 8      | -0.8      | 0.678           |
| 4256 | Famotidine                                              | LOPAC   | 7        | B   | 8      | 0.243     | -0.344          |
| 4257 | FSCPX                                                   | LOPAC   | 7        | C   | 8      | 1.851     | -1.73           |
| 4258 | NS8593 hydrochloride                                    | LOPAC   | 7        | D   | 8      | 0.472     | -0.514          |
| 4259 | Flunarizine dihydrochloride                             | LOPAC   | 7        | E   | 8      | 0.527     | -0.948          |
| 4260 | 5-fluoro-5'-deoxyuridine                                | LOPAC   | 7        | F   | 8      | 0.081     | -0.576          |
| 4261 | Flupirtine maleate                                      | LOPAC   | 7        | G   | 8      | 0.182     | -1.079          |
| 4262 | Flutamide                                               | LOPAC   | 7        | H   | 8      | -0.827    | -0.167          |
| 4263 | Fexofenadine hydrochloride                              | LOPAC   | 7        | A   | 9      | -0.762    | 0.088           |
| 4264 | Formoterol                                              | LOPAC   | 7        | B   | 9      | 0.382     | -0.618          |
| 4265 | Felodipine                                              | LOPAC   | 7        | C   | 9      | 0.423     | -0.634          |
| 4266 | Fluspiprene                                             | LOPAC   | 7        | D   | 9      | 0.758     | -0.965          |
| 4267 | cis-(Z)-Flupenthixol dihydrochloride                    | LOPAC   | 7        | E   | 9      | 0.335     | -0.623          |
| 4268 | Furafylline                                             | LOPAC   | 7        | F   | 9      | 0.231     | -0.424          |
| 4269 | FPL 64176                                               | LOPAC   | 7        | G   | 9      | 0.023     | -0.59           |
| 4270 | Fluoxetine hydrochloride                                | LOPAC   | 7        | H   | 9      | -0.54     | 0.239           |
| 4271 | N-(3,3-Diphenylpropyl)glycinamide                       | LOPAC   | 7        | A   | 10     | -0.972    | -0.323          |
| 4272 | Glybenclamide                                           | LOPAC   | 7        | B   | 10     | -0.391    | -0.016          |
| 4273 | GW2974                                                  | LOPAC   | 7        | C   | 10     | 0.473     | 1.506           |
| 4274 | Guanfacine hydrochloride                                | LOPAC   | 7        | D   | 10     | 0.264     | -0.916          |
| 4275 | L-Glutamic acid hydrochloride                           | LOPAC   | 7        | E   | 10     | -0.295    | -0.258          |
| 4276 | Ganciclovir                                             | LOPAC   | 7        | F   | 10     | 0.24      | -0.941          |
| 4277 | L-Glutamine                                             | LOPAC   | 7        | G   | 10     | -0.308    | -0.58           |
| 4278 | Guanidinylnaltrindole di-trifluoroacetate               | LOPAC   | 7        | H   | 10     | -0.585    | -0.816          |
| 4279 | L-Canavanine                                            | LOPAC   | 7        | A   | 11     | -0.895    | -0.188          |
| 4280 | Bezafibrate                                             | LOPAC   | 7        | B   | 11     | 0.024     | -0.769          |
| 4281 | GW5074                                                  | LOPAC   | 7        | C   | 11     | -0.042    | 0.008           |
| 4282 | Genistein                                               | LOPAC   | 7        | D   | 11     | 0.621     | 0.17            |
| 4283 | GW7647                                                  | LOPAC   | 7        | E   | 11     | 0.413     | 0.264           |
| 4284 | alpha-Guanidinoglutaric acid                            | LOPAC   | 7        | F   | 11     | -0.227    | -0.484          |
| 4285 | Gallamine triethiodide                                  | LOPAC   | 7        | G   | 11     | -0.346    | -0.189          |
| 4286 | GBR-12935 dihydrochloride                               | LOPAC   | 7        | H   | 11     | -0.406    | -0.216          |
| 4287 | Isoguvacine hydrochloride                               | LOPAC   | 8        | A   | 2      | -0.041    | 0.161           |
| 4288 | Guvacine hydrochloride                                  | LOPAC   | 8        | B   | 2      | 0.171     | 0.139           |
| 4289 | (±)-AMPA hydrobromide                                   | LOPAC   | 8        | C   | 2      | 0.009     | 1.253           |
| 4290 | Muscimol hydrobromide                                   | LOPAC   | 8        | D   | 2      | 0.957     | 0.585           |
| 4291 | Guanabenz acetate                                       | LOPAC   | 8        | E   | 2      | 0.245     | 1.439           |
| 4292 | JFD00244                                                | LOPAC   | 8        | F   | 2      | -0.438    | 1.867           |
| 4293 | Glipizide                                               | LOPAC   | 8        | G   | 2      | -0.157    | 0.634           |
| 4294 | GYKI 52466 hydrochloride                                | LOPAC   | 8        | H   | 2      | -0.76     | 0.125           |
| 4295 | Paliperidone                                            | LOPAC   | 8        | A   | 3      | -0.499    | 0.128           |
| 4296 | GR-89696 fumarate                                       | LOPAC   | 8        | B   | 3      | -0.184    | -0.112          |
| 4297 | Gabapentin                                              | LOPAC   | 8        | C   | 3      | 0.11      | 0.28            |
| 4298 | DL-Homatropine hydrobromide                             | LOPAC   | 8        | D   | 3      | 0.204     | 1.008           |
| 4299 | (±)-Vanillylmandelic acid                               | LOPAC   | 8        | E   | 3      | -0.097    | 0.064           |
| 4300 | 6-Hydroxymelatonin                                      | LOPAC   | 8        | F   | 3      | -0.221    | -0.082          |
| 4301 | Hexamethonium bromide                                   | LOPAC   | 8        | G   | 3      | -0.541    | 0.317           |
| 4302 | 4-Hydroxy-3-methoxyphenylacetic acid                    | LOPAC   | 8        | H   | 3      | -1.348    | -0.415          |
| 4303 | MHPG piperazine                                         | LOPAC   | 8        | A   | 4      | -0.979    | 0.007           |
| 4304 | Hypotaunine                                             | LOPAC   | 8        | B   | 4      | -0.388    | 0.009           |
| 4305 | Haloperidol                                             | LOPAC   | 8        | C   | 4      | -0.073    | 0.498           |
| 4306 | Hydralazine hydrochloride                               | LOPAC   | 8        | D   | 4      | 0.23      | 0.407           |
| 4307 | 4-Imidazolomethanol hydrochloride                       | LOPAC   | 8        | E   | 4      | -0.427    | 0.35            |
| 4308 | Hexamethonium dichloride                                | LOPAC   | 8        | F   | 4      | -0.153    | -0.677          |
| 4309 | Bendamustine hydrochloride                              | LOPAC   | 8        | G   | 4      | -0.485    | -0.142          |
| 4310 | 6-Hydroxy-DL-DOPA                                       | LOPAC   | 8        | H   | 4      | -0.757    | 0.672           |
| 4311 | DL-threo-beta-hydroxyaspartic acid                      | LOPAC   | 8        | A   | 5      | -0.542    | -0.238          |
| 4312 | Ciproxifan hydrochloride                                | LOPAC   | 8        | B   | 5      | -0.043    | 0.28            |
| 4313 | Hydroxytacrine maleate                                  | LOPAC   | 8        | C   | 5      | 0.107     | 0.936           |
| 4314 | Hydrocortisone                                          | LOPAC   | 8        | D   | 5      | 0.787     | 0.985           |
| 4315 | Lithium Chloride                                        | LOPAC   | 8        | E   | 5      | -0.852    | 0.401           |
| 4316 | Hydrochlorothiazide                                     | LOPAC   | 8        | F   | 5      | -0.047    | 0.401           |
| 4317 | SB 218795                                               | LOPAC   | 8        | G   | 5      | -0.786    | 0.198           |
| 4318 | Hispidin                                                | LOPAC   | 8        | H   | 5      | -0.895    | 0.908           |
| 4319 | 17alpha-hydroxyprogesterone                             | LOPAC   | 8        | A   | 6      | -0.31     | 0.142           |
| 4320 | 1,3,5-tris(4-hydroxyphenyl)-4-propyl-1H-pyrazole        | LOPAC   | 8        | B   | 6      | -0.491    | 0.399           |
| 4321 | 1-(4-Hydroxybenzyl)imidazole-2-thiol                    | LOPAC   | 8        | C   | 6      | -0.557    | 0.321           |
| 4322 | Histamine dihydrochloride                               | LOPAC   | 8        | D   | 6      | -0.239    | 0.364           |
| 4323 | Hammane                                                 | LOPAC   | 8        | E   | 6      | -0.704    | 0.35            |
| 4324 | JS-K                                                    | LOPAC   | 8        | F   | 6      | -0.751    | 0.008           |
| 4325 | Retinoic acid p-hydroxyanilide                          | LOPAC   | 8        | G   | 6      | 0.16      | -0.598          |
| 4326 | ABT-702 dihydrochloride                                 | LOPAC   | 8        | H   | 6      | -0.005    | 0.679           |
| 4327 | L-Histidine hydrochloride                               | LOPAC   | 8        | A   | 7      | -0.585    | -1.149          |
| 4328 | (±)-8-Hydroxy-DPAT hydrobromide                         | LOPAC   | 8        | B   | 7      | 0.056     | 0.359           |
| 4329 | Dopamine hydrochloride                                  | LOPAC   | 8        | C   | 7      | 0.287     | -1.188          |
| 4330 | Hydroxyurea                                             | LOPAC   | 8        | D   | 7      | 0.382     | -0.967          |
| 4331 | (+)-Hydrastine                                          | LOPAC   | 8        | E   | 7      | 0.373     | -0.424          |
| 4332 | (±)-7-Hydroxy-DPAT hydrobromide                         | LOPAC   | 8        | F   | 7      | 0.013     | -0.576          |
| 4333 | MHPG sulfate potassium                                  | LOPAC   | 8        | G   | 7      | -0.159    | -0.606          |
| 4334 | 5-Hydroxyindolacetic acid                               | LOPAC   | 8        | H   | 7      | -0.888    | 0.372           |
| 4335 | L-Hyoscyamine                                           | LOPAC   | 8        | A   | 8      | -0.349    | -0.424          |
| 4336 | Hydroquinone                                            | LOPAC   | 8        | B   | 8      | 0.04      | -0.198          |
| 4337 | BUS906                                                  | LOPAC   | 8        | C   | 8      | 0.273     | -0.007          |
| 4338 | MNS                                                     | LOPAC   | 8        | D   | 8      | 0.534     | -0.873          |
| 4339 | Serotonin hydrochloride                                 | LOPAC   | 8        | E   | 8      | 0.368     | 0.537           |
| 4340 | L-165,041                                               | LOPAC   | 8        | F   | 8      | 0.035     | 1.298           |
| 4341 | 5-Hydroxy-L-tryptophan                                  | LOPAC   | 8        | G   | 8      | -1.066    | -0.519          |
| 4342 | Hydroxylamine hydrochloride                             | LOPAC   | 8        | H   | 8      | -1.258    | -0.439          |
| 4343 | 4-Hydroxybenzhydrazide                                  | LOPAC   | 8        | A   | 9      | -0.417    | 0.58            |
| 4344 | Hemicholinium-3                                         | LOPAC   | 8        | B   | 9      | -0.129    | 0.59            |
| 4345 | BNTX maleate salt hydrate                               | LOPAC   | 8        | C   | 9      | 1.088     | -1.239          |
| 4346 | N-Methylhistaprodifen dioxalate salt                    | LOPAC   | 8        | D   | 9      | -0.248    | 0.99            |
| 4347 | Hexahydro-sila-difenidol hydrochloride, p-fluoro analog | LOPAC   | 8        | E   | 9      | -0.559    | 0.692           |
| 4348 | Histamine, R(-)-alpha-methyl-, dihydrochloride          | LOPAC   | 8        | F   | 9      | -0.721    | -0.253          |
| 4349 | 5-hydroxydecanoic acid sodium                           | LOPAC   | 8        | G   | 9      | -0.861    | -0.894          |
| 4350 | R-(+)-8-Hydroxy-DPAT hydrobromide                       | LOPAC   | 8        | H   | 9      | -1.059    | -0.749          |
| 4351 | R-(+)-7-Hydroxy-DPAT hydrobromide                       | LOPAC   | 8        | A   | 10     | -0.18     | -0.141          |
| 4352 | Sematilide monohydrochloride monohydrate                | LOPAC   | 8        | B   | 10     | -0.139    | 0.042           |
| 4353 | ATPO                                                    | LOPAC   | 8        | C   | 10     | 0.082     | 0.508           |
| 4354 | Ibudilast                                               | LOPAC   | 8        | D   | 10     | 0.403     | 0.57            |
| 4355 | Imidazole-4-acetic acid hydrochloride                   | LOPAC   | 8        | E   | 10     | -0.226    | 0.24            |
| 4356 | CPNQ                                                    | LOPAC   | 8        | F   | 10     | -0.257    | 0.383           |
| 4357 | NSC 95397                                               | LOPAC   | 8        | G   | 10     | -1.443    | -0.616          |
| 4358 | Imazodan                                                | LOPAC   | 8        | H   | 10     | -0.423    | -1.154          |
| 4359 | Iodoacetamide                                           | LOPAC   | 8        | A   | 11     | -0.154    | -0.388          |



SUPPLEMENTARY DATA

|      | Name                                                                    | Library | Plate No | Row | Column | ROS score | viability score |
|------|-------------------------------------------------------------------------|---------|----------|-----|--------|-----------|-----------------|
| 4380 | HA-100                                                                  | LOPAC   | 8        | B   | 11     | 0.308     | -0.502          |
| 4361 | Ipratropium bromide                                                     | LOPAC   | 8        | C   | 11     | 0.231     | -0.371          |
| 4362 | Idarubicin                                                              | LOPAC   | 8        | D   | 11     | 1.991     | -6.78           |
| 4363 | Metolazone                                                              | LOPAC   | 8        | E   | 11     | -0.426    | 0.123           |
| 4364 | GR 55562 dihydrobromide                                                 | LOPAC   | 8        | F   | 11     | 0.266     | 0.68            |
| 4365 | IMID-4F hydrochloride                                                   | LOPAC   | 8        | G   | 11     | 0.493     | -0.429          |
| 4366 | R(-)-Isoproterenol (+)-bitartrate                                       | LOPAC   | 8        | H   | 11     | -1.442    | -1.074          |
| 4367 | ML-7                                                                    | LOPAC   | 9        | A   | 2      | -0.637    | 0.854           |
| 4368 | (±)-Ibuprofen                                                           | LOPAC   | 9        | B   | 2      | -0.016    | 0.908           |
| 4369 | ifenprodil tartrate                                                     | LOPAC   | 9        | C   | 2      | 0.144     | 0.258           |
| 4370 | Isotharine mesylate                                                     | LOPAC   | 9        | D   | 2      | -0.33     | 0.408           |
| 4371 | Isoliquimbigenin                                                        | LOPAC   | 9        | E   | 2      | -0.41     | 0.738           |
| 4372 | (±)-Ibuprofen                                                           | LOPAC   | 9        | F   | 2      | -0.596    | 1.548           |
| 4373 | SD-168                                                                  | LOPAC   | 9        | G   | 2      | 0.02      | 0.718           |
| 4374 | (±)-Isoproterenol hydrochloride                                         | LOPAC   | 9        | H   | 2      | -1.418    | 1.563           |
| 4375 | 3-Isobutyl-1-methylxanthine                                             | LOPAC   | 9        | A   | 3      | -0.471    | 0.479           |
| 4376 | Idazoxan hydrochloride                                                  | LOPAC   | 9        | B   | 3      | -1.151    | 0.197           |
| 4377 | 1-(5-Isquinolinylsulfonyl)-3-methylpiperazine dihydrochloride           | LOPAC   | 9        | C   | 3      | -0.194    | 0.505           |
| 4378 | (-)-Isoproterenol hydrochloride                                         | LOPAC   | 9        | D   | 3      | 0.182     | -0.381          |
| 4379 | 1-(5-Isquinolinylsulfonyl)-2-methylpiperazine dihydrochloride           | LOPAC   | 9        | E   | 3      | -0.588    | -0.484          |
| 4380 | Indomethacin                                                            | LOPAC   | 9        | F   | 3      | -0.008    | -0.477          |
| 4381 | Imipramine hydrochloride                                                | LOPAC   | 9        | G   | 3      | -0.404    | 0.779           |
| 4382 | Isoxanthopterin                                                         | LOPAC   | 9        | H   | 3      | -0.916    | 0.088           |
| 4383 | Iproniazid phosphate                                                    | LOPAC   | 9        | A   | 4      | -0.972    | -0.025          |
| 4384 | S(+)-Isoproterenol (+)-bitartrate                                       | LOPAC   | 9        | B   | 4      | -0.884    | 0.48            |
| 4385 | L-N6-(1-Iminoethyl)lysine hydrochloride                                 | LOPAC   | 9        | C   | 4      | -0.616    | 0.221           |
| 4386 | 3-Iodo-L-tyrosine                                                       | LOPAC   | 9        | D   | 4      | -0.128    | -0.542          |
| 4387 | Cibenzoline succinate                                                   | LOPAC   | 9        | E   | 4      | 0.133     | -0.084          |
| 4388 | Ivermectin                                                              | LOPAC   | 9        | F   | 4      | -0.104    | -0.01           |
| 4389 | Imiloxan hydrochloride                                                  | LOPAC   | 9        | G   | 4      | -0.844    | 0.955           |
| 4390 | Stevioside                                                              | LOPAC   | 9        | H   | 4      | -0.725    | 0.218           |
| 4391 | m-4-iodobenzylguanidine hemisulfate                                     | LOPAC   | 9        | A   | 5      | 1.007     | -2.081          |
| 4392 | S(+)-Ibuprofen                                                          | LOPAC   | 9        | B   | 5      | -0.354    | 0.503           |
| 4393 | p-Iodoclonidine hydrochloride                                           | LOPAC   | 9        | C   | 5      | -0.428    | -0.08           |
| 4394 | R(+)-IAA-84                                                             | LOPAC   | 9        | D   | 5      | 0.098     | -0.108          |
| 4395 | Indatraline hydrochloride                                               | LOPAC   | 9        | E   | 5      | -0.391    | 0.087           |
| 4396 | lofetamine hydrochloride                                                | LOPAC   | 9        | F   | 5      | -0.049    | 0.64            |
| 4397 | ICI 204,448 hydrochloride                                               | LOPAC   | 9        | G   | 5      | -0.519    | 1.832           |
| 4398 | SB-525334                                                               | LOPAC   | 9        | H   | 5      | -1.12     | -1.143          |
| 4399 | Imetit dihydrobromide                                                   | LOPAC   | 9        | A   | 6      | -0.838    | 0.551           |
| 4400 | 1,5-Isquinolinediol                                                     | LOPAC   | 9        | B   | 6      | 0.091     | 0.398           |
| 4401 | Molindone hydrochloride                                                 | LOPAC   | 9        | C   | 6      | 0.07      | -0.183          |
| 4402 | IB-MECA                                                                 | LOPAC   | 9        | D   | 6      | 0.124     | -0.025          |
| 4403 | Aurothioglucose                                                         | LOPAC   | 9        | E   | 6      | 0.143     | 0.388           |
| 4404 | 3-(1H-Imidazol-4-yl)propyl di(p-fluorophenyl)methyl ether hydrochloride | LOPAC   | 9        | F   | 6      | -0.141    | 0.084           |
| 4405 | Isonipetric acid                                                        | LOPAC   | 9        | G   | 6      | -1.356    | 1.184           |
| 4406 | JWH-015                                                                 | LOPAC   | 9        | H   | 6      | -0.45     | 0.482           |
| 4407 | JL-18                                                                   | LOPAC   | 9        | A   | 7      | -0.973    | 0.218           |
| 4408 | Kaonic acid                                                             | LOPAC   | 9        | B   | 7      | -0.738    | 0.4             |
| 4409 | Ketocanazole                                                            | LOPAC   | 9        | C   | 7      | -0.265    | 1.458           |
| 4410 | Ketorolac tris salt                                                     | LOPAC   | 9        | D   | 7      | 0.335     | -0.111          |
| 4411 | Ketoprofen                                                              | LOPAC   | 9        | E   | 7      | 2.182     | -0.488          |
| 4412 | K 185                                                                   | LOPAC   | 9        | F   | 7      | 0.435     | -0.13           |
| 4413 | Ketolifen fumarate                                                      | LOPAC   | 9        | G   | 7      | -0.182    | 0.152           |
| 4414 | Kymurenic acid                                                          | LOPAC   | 9        | H   | 7      | -0.702    | -0.893          |
| 4415 | Kenpaullone                                                             | LOPAC   | 9        | A   | 8      | -0.891    | 1.494           |
| 4416 | U-73343                                                                 | LOPAC   | 9        | B   | 8      | -0.177    | 0.483           |
| 4417 | L-701,324                                                               | LOPAC   | 9        | C   | 8      | -0.103    | 0.123           |
| 4418 | Ioxoprofen                                                              | LOPAC   | 9        | D   | 8      | -0.257    | 0.811           |
| 4419 | Labelalol hydrochloride                                                 | LOPAC   | 9        | E   | 8      | -0.194    | 0.794           |
| 4420 | L-162,313                                                               | LOPAC   | 9        | F   | 8      | 0.015     | 0.242           |
| 4421 | CYPFA                                                                   | LOPAC   | 9        | G   | 8      | -0.334    | 1.211           |
| 4422 | beta-Lapachone                                                          | LOPAC   | 9        | H   | 8      | 1.257     | -5.407          |
| 4423 | LY-387,265                                                              | LOPAC   | 9        | A   | 9      | -1.188    | 1.049           |
| 4424 | LY-310,762 hydrochloride                                                | LOPAC   | 9        | B   | 9      | -0.596    | 0.74            |
| 4425 | Olvamil                                                                 | LOPAC   | 9        | C   | 9      | -0.383    | 0.391           |
| 4426 | Lomexifloxan hydrochloride                                              | LOPAC   | 9        | D   | 9      | -0.22     | -0.049          |
| 4427 | Lamotrigine                                                             | LOPAC   | 9        | E   | 9      | 0.148     | -2.19           |
| 4428 | alpha-Lobeline hydrochloride                                            | LOPAC   | 9        | F   | 9      | 0.091     | -1.195          |
| 4429 | Loperamide hydrochloride                                                | LOPAC   | 9        | G   | 9      | -0.592    | -0.442          |
| 4430 | Lonidamine                                                              | LOPAC   | 9        | H   | 9      | -0.795    | 0.31            |
| 4431 | Leflunomide                                                             | LOPAC   | 9        | A   | 10     | -0.374    | 0.588           |
| 4432 | VER-3323 hemifumarate salt                                              | LOPAC   | 9        | B   | 10     | -0.428    | 0.259           |
| 4433 | Lidocaine hydrochloride                                                 | LOPAC   | 9        | C   | 10     | -0.126    | 0.181           |
| 4434 | Lidocaine N-ethyl bromide quaternary salt                               | LOPAC   | 9        | D   | 10     | 0.832     | -0.781          |
| 4435 | 4-Aminidophenylmethanesulfonyl fluoride hydrochloride                   | LOPAC   | 9        | E   | 10     | 0.257     | -0.627          |
| 4436 | LE 300                                                                  | LOPAC   | 9        | F   | 10     | 0.367     | -0.68           |
| 4437 | Lansoprazole                                                            | LOPAC   | 9        | G   | 10     | -0.96     | 0.088           |
| 4438 | L-687,384 hydrochloride                                                 | LOPAC   | 9        | H   | 10     | 0.2       | -0.989          |
| 4439 | LFM-A13                                                                 | LOPAC   | 9        | A   | 11     | -0.194    | -0.184          |
| 4440 | NNC 55-0396                                                             | LOPAC   | 9        | B   | 11     | -0.617    | -0.802          |
| 4441 | Ro 90-7501                                                              | LOPAC   | 9        | C   | 11     | 0.386     | -0.476          |
| 4442 | Loratadine                                                              | LOPAC   | 9        | D   | 11     | 0.657     | -0.389          |
| 4443 | (-)-Tetramsole hydrochloride                                            | LOPAC   | 9        | E   | 11     | 0.246     | -1.792          |
| 4444 | L-655,708                                                               | LOPAC   | 9        | F   | 11     | 0.59      | -0.812          |
| 4445 | LY-294,002 hydrochloride                                                | LOPAC   | 9        | G   | 11     | 0.924     | -1.48           |
| 4446 | Loxapine succinate                                                      | LOPAC   | 9        | H   | 11     | 0.056     | -0.831          |
| 4447 | TMFH hydrochloride                                                      | LOPAC   | 10       | A   | 2      | 0.2       | 1.128           |
| 4448 | Lorglumide sodium                                                       | LOPAC   | 10       | B   | 2      | 0.098     | 0.411           |
| 4449 | CHM-1 hydrate                                                           | LOPAC   | 10       | C   | 2      | 1.07      | -1.505          |
| 4450 | cis-(+)-8-OH-PBZ1 hydrobromide                                          | LOPAC   | 10       | D   | 2      | 0.105     | 0.597           |
| 4451 | BW 723C86                                                               | LOPAC   | 10       | E   | 2      | -0.163    | 0.462           |
| 4452 | Levallorphan tartrate                                                   | LOPAC   | 10       | F   | 2      | 0.127     | 0.595           |
| 4453 | AFMK                                                                    | LOPAC   | 10       | G   | 2      | -0.496    | 0.717           |
| 4454 | L-745,870 hydrochloride                                                 | LOPAC   | 10       | H   | 2      | -1.484    | 0.779           |
| 4455 | L-750,667 trihydrochloride                                              | LOPAC   | 10       | A   | 3      | -1.44     | 0.733           |
| 4456 | Linopirdine                                                             | LOPAC   | 10       | B   | 3      | 0.054     | -0.234          |
| 4457 | L-741,626                                                               | LOPAC   | 10       | C   | 3      | 0.078     | 0.212           |
| 4458 | L-703,606 oxalate salt hydrate                                          | LOPAC   | 10       | D   | 3      | 0.148     | -0.616          |
| 4459 | Metoclopramide hydrochloride                                            | LOPAC   | 10       | E   | 3      | -0.013    | -0.278          |
| 4460 | R(-)-Me5                                                                | LOPAC   | 10       | F   | 3      | -0.235    | -0.14           |
| 4461 | Dihydrocapsaicin                                                        | LOPAC   | 10       | G   | 3      | -0.263    | 0.294           |
| 4462 | (-)-Naproxen sodium                                                     | LOPAC   | 10       | H   | 3      | -0.753    | 0.795           |
| 4463 | 4-Methylpyrazole hydrochloride                                          | LOPAC   | 10       | A   | 4      | -0.745    | 0.43            |
| 4464 | Nocodazole                                                              | LOPAC   | 10       | B   | 4      | 0.616     | -2.644          |

SUPPLEMENTARY DATA

|      | Name                                                              | Library | Plate No | Row | Column | ROS score | viability score |
|------|-------------------------------------------------------------------|---------|----------|-----|--------|-----------|-----------------|
| 4485 | N-omega-Methyl-5-hydroxytryptamine oxalate salt                   | LOPAC   | 10       | C   | 4      | -0.087    | -0.733          |
| 4486 | Moxonidine hydrochloride                                          | LOPAC   | 10       | D   | 4      | 0.31      | -0.353          |
| 4487 | MRS 1845                                                          | LOPAC   | 10       | E   | 4      | 0.385     | 0.035           |
| 4488 | BIO                                                               | LOPAC   | 10       | F   | 4      | 0.104     | -0.048          |
| 4489 | MRS 1523                                                          | LOPAC   | 10       | G   | 4      | -0.15     | -0.18           |
| 4470 | Meflphalan                                                        | LOPAC   | 10       | H   | 4      | -0.514    | 0.344           |
| 4471 | p-MPPI hydrochloride                                              | LOPAC   | 10       | A   | 5      | -0.333    | 0.48            |
| 4472 | Metaprolerenol hemisulfate                                        | LOPAC   | 10       | B   | 5      | -0.478    | 0.511           |
| 4473 | Mianserin hydrochloride                                           | LOPAC   | 10       | C   | 5      | -0.318    | 0.861           |
| 4474 | Mevastatin                                                        | LOPAC   | 10       | D   | 5      | 2.738     | -1.843          |
| 4475 | 8-Methoxymethyl-3-isobutyl-1-methylxanthine                       | LOPAC   | 10       | E   | 5      | -0.011    | 0.055           |
| 4476 | MK 385                                                            | LOPAC   | 10       | F   | 5      | -0.002    | -0.227          |
| 4477 | Mexiletene hydrochloride                                          | LOPAC   | 10       | G   | 5      | -0.044    | 0.813           |
| 4478 | Methylergonovine maleate                                          | LOPAC   | 10       | H   | 5      | -0.722    | 0.834           |
| 4479 | Molsidomine                                                       | LOPAC   | 10       | A   | 6      | -1.276    | 0.253           |
| 4480 | BBMP                                                              | LOPAC   | 10       | B   | 6      | -1.138    | 0.489           |
| 4481 | Mizonibine                                                        | LOPAC   | 10       | C   | 6      | 0.085     | -0.613          |
| 4482 | S-Methylisothiourea hemisulfate                                   | LOPAC   | 10       | D   | 6      | 0.204     | -0.412          |
| 4483 | MG 624                                                            | LOPAC   | 10       | E   | 6      | 1.57      | -3.562          |
| 4484 | N-Methyl-D-aspartic acid                                          | LOPAC   | 10       | F   | 6      | -0.047    | -0.411          |
| 4485 | alpha-Methyl-DL-tyrosine methyl ester hydrochloride               | LOPAC   | 10       | G   | 6      | -0.306    | 0.003           |
| 4486 | ML 10302                                                          | LOPAC   | 10       | H   | 6      | -0.703    | 0.201           |
| 4487 | Metergoline                                                       | LOPAC   | 10       | A   | 7      | -1.722    | 0.593           |
| 4488 | (-)-cis-(1S,2R)-U-50488 tartrate                                  | LOPAC   | 10       | B   | 7      | -0.412    | 0.897           |
| 4489 | Clorgyline hydrochloride                                          | LOPAC   | 10       | C   | 7      | 0.213     | 0.004           |
| 4490 | MRS 2179                                                          | LOPAC   | 10       | D   | 7      | 0.135     | -0.679          |
| 4491 | Meloxicam sodium                                                  | LOPAC   | 10       | E   | 7      | 0.356     | -1.453          |
| 4492 | Morfin                                                            | LOPAC   | 10       | F   | 7      | -0.201    | -0.218          |
| 4493 | Minoxidil                                                         | LOPAC   | 10       | G   | 7      | -0.138    | -0.23           |
| 4494 | Rufinamide                                                        | LOPAC   | 10       | H   | 7      | -1.26     | 0.237           |
| 4495 | Meclofenamic acid sodium                                          | LOPAC   | 10       | A   | 8      | -1.481    | 1.036           |
| 4496 | Mirinone                                                          | LOPAC   | 10       | B   | 8      | -0.395    | 1.17            |
| 4497 | (±)-alpha-Methyl-4-carboxyphenylglycine                           | LOPAC   | 10       | C   | 8      | -0.88     | 0.777           |
| 4498 | 1-Methylhistamine dihydrochloride                                 | LOPAC   | 10       | D   | 8      | -0.392    | 1.298           |
| 4499 | Moxisylyte hydrochloride                                          | LOPAC   | 10       | E   | 8      | -0.73     | 0.636           |
| 4500 | S-Methyl-L-thiocitrulline acetate                                 | LOPAC   | 10       | F   | 8      | -0.282    | 0.744           |
| 4501 | Melatonin                                                         | LOPAC   | 10       | G   | 8      | -0.687    | 0.634           |
| 4502 | L-Methionine sulfoximine                                          | LOPAC   | 10       | H   | 8      | -1.627    | 0.367           |
| 4503 | (±)-Metoprolol (+)-tartrate                                       | LOPAC   | 10       | A   | 9      | -1.375    | 1.183           |
| 4504 | 6-Methyl-2-(phenylethynyl)pyridine hydrochloride                  | LOPAC   | 10       | B   | 9      | -0.784    | 0.452           |
| 4505 | Mibefradil dihydrochloride                                        | LOPAC   | 10       | C   | 9      | -0.103    | -0.335          |
| 4506 | N6-Methyladenosine                                                | LOPAC   | 10       | D   | 9      | -0.025    | -0.545          |
| 4507 | (SI)-MAP4 hydrochloride                                           | LOPAC   | 10       | E   | 9      | -0.357    | 0.086           |
| 4508 | (±)-Methoxyverapamil hydrochloride                                | LOPAC   | 10       | F   | 9      | -0.039    | 0.46            |
| 4509 | Metrazoline oxalate                                               | LOPAC   | 10       | G   | 9      | -0.674    | 0.41            |
| 4510 | GW9662                                                            | LOPAC   | 10       | H   | 9      | -1        | -0.144          |
| 4511 | GW405833 hydrochloride                                            | LOPAC   | 10       | A   | 10     | -0.611    | -0.219          |
| 4512 | 2-methoxyestradiol                                                | LOPAC   | 10       | B   | 10     | 0.757     | -1.719          |
| 4513 | Cysteamine hydrochloride                                          | LOPAC   | 10       | C   | 10     | 0.625     | -0.337          |
| 4514 | alpha,beta-Methylene adenosine 5'-triphosphate diltium            | LOPAC   | 10       | D   | 10     | 0.475     | -0.349          |
| 4515 | Methoxamine hydrochloride                                         | LOPAC   | 10       | E   | 10     | 0.271     | -0.633          |
| 4516 | Mitoxantrone                                                      | LOPAC   | 10       | F   | 10     | 0.97      | -1.875          |
| 4517 | O-Methylserotonin hydrochloride                                   | LOPAC   | 10       | G   | 10     | -0.113    | 0.391           |
| 4518 | Se-(methyl)selenocysteine hydrochloride                           | LOPAC   | 10       | H   | 10     | -0.713    | 0.035           |
| 4519 | MDL 28170                                                         | LOPAC   | 10       | A   | 11     | -0.615    | 0.433           |
| 4520 | Myricetin                                                         | LOPAC   | 10       | B   | 11     | 0.587     | 0.39            |
| 4521 | NG-Monomethyl-L-arginine acetate                                  | LOPAC   | 10       | C   | 11     | 0.502     | 0.342           |
| 4522 | MK-912                                                            | LOPAC   | 10       | D   | 11     | 0.587     | -0.228          |
| 4523 | (±)-3-(3,4-dihydroxyphenyl)-2-methyl-DL-alanine                   | LOPAC   | 10       | E   | 11     | 0.531     | 0.247           |
| 4524 | MRS 2159                                                          | LOPAC   | 10       | F   | 11     | 0.342     | 0.999           |
| 4525 | GR 127935 hydrochloride hydrate                                   | LOPAC   | 10       | G   | 11     | 0.205     | 0.568           |
| 4526 | 2,6-Difluoro-4-[2-(phenylsulfonylamino)ethylthio]phenoxyacetamide | LOPAC   | 10       | H   | 11     | -1.642    | -0.12           |
| 4527 | Mifepristone                                                      | LOPAC   | 11       | A   | 2      | 0.075     | 1.707           |
| 4528 | L-alpha-Methyl-p-tyrosine                                         | LOPAC   | 11       | B   | 2      | -0.372    | 0.707           |
| 4529 | SB-215505                                                         | LOPAC   | 11       | C   | 2      | 0.265     | -0.332          |
| 4530 | 1-Methylimidazole                                                 | LOPAC   | 11       | D   | 2      | -0.045    | -0.107          |
| 4531 | Mecamylamine hydrochloride                                        | LOPAC   | 11       | E   | 2      | -0.277    | -0.262          |
| 4532 | Methapyrilene hydrochloride                                       | LOPAC   | 11       | F   | 2      | -0.029    | 0.751           |
| 4533 | Memantine hydrochloride                                           | LOPAC   | 11       | G   | 2      | -0.255    | 0.339           |
| 4534 | Me-3,4-dephostatin                                                | LOPAC   | 11       | H   | 2      | -0.457    | 0.59            |
| 4535 | Minocycline hydrochloride                                         | LOPAC   | 11       | A   | 3      | -0.452    | 0.305           |
| 4536 | Maprotiline hydrochloride                                         | LOPAC   | 11       | B   | 3      | -0.507    | 0.299           |
| 4537 | H-8 dihydrochloride                                               | LOPAC   | 11       | C   | 3      | 0.14      | 0.259           |
| 4538 | Proglumide                                                        | LOPAC   | 11       | D   | 3      | 0.077     | 0.374           |
| 4539 | Fenobam                                                           | LOPAC   | 11       | E   | 3      | 0.214     | 1.068           |
| 4540 | (±)-Muscarine chloride                                            | LOPAC   | 11       | F   | 3      | 0.489     | 0.858           |
| 4541 | Methocramine tetrahydrochloride                                   | LOPAC   | 11       | G   | 3      | 0.236     | 0.53            |
| 4542 | (+)-MK-801 hydrogen maleate                                       | LOPAC   | 11       | H   | 3      | -0.956    | 0.612           |
| 4543 | (-)-MK-801 hydrogen maleate                                       | LOPAC   | 11       | A   | 4      | -0.171    | -0.211          |
| 4544 | 2-Methyl-5-hydroxytryptamine maleate                              | LOPAC   | 11       | B   | 4      | -0.195    | -1.115          |
| 4545 | alpha-Methyl-5-hydroxytryptamine maleate                          | LOPAC   | 11       | C   | 4      | 0.166     | -0.752          |
| 4546 | Metolazone                                                        | LOPAC   | 11       | D   | 4      | 0.282     | -0.528          |
| 4547 | DFB                                                               | LOPAC   | 11       | E   | 4      | 0.563     | 0.51            |
| 4548 | L-alpha-Methyl DOPA                                               | LOPAC   | 11       | F   | 4      | 0.52      | -0.388          |
| 4549 | Methysergide maleate                                              | LOPAC   | 11       | G   | 4      | 0.171     | -0.305          |
| 4550 | Ethopropazine hydrochloride                                       | LOPAC   | 11       | H   | 4      | -0.887    | 0.285           |
| 4551 | Methiohepin mesylate                                              | LOPAC   | 11       | A   | 5      | 0.062     | -0.812          |
| 4552 | Nemadipine-A                                                      | LOPAC   | 11       | B   | 5      | 0.805     | -0.458          |
| 4553 | Moclobemide                                                       | LOPAC   | 11       | C   | 5      | 0.218     | -0.734          |
| 4554 | MDL 26,630 trihydrochloride                                       | LOPAC   | 11       | D   | 5      | 0.738     | -0.487          |
| 4555 | ZM 39923 hydrochloride                                            | LOPAC   | 11       | E   | 5      | 0.235     | -0.881          |
| 4556 | 3-Morpholiniosydnonimine hydrochloride                            | LOPAC   | 11       | F   | 5      | 0.172     | 0.086           |
| 4557 | 3-Methoxy-morphinan hydrochloride                                 | LOPAC   | 11       | G   | 5      | 0.595     | 0.398           |
| 4558 | S15535                                                            | LOPAC   | 11       | H   | 5      | -0.785    | 0.096           |
| 4559 | MDL 105,519                                                       | LOPAC   | 11       | A   | 6      | 0.042     | 1.07            |
| 4560 | Sivelestat sodium salt hydrate                                    | LOPAC   | 11       | B   | 6      | 0.023     | -0.052          |
| 4561 | p-MPPF dihydrochloride                                            | LOPAC   | 11       | C   | 6      | -0.088    | -0.098          |
| 4562 | Levetiracetam                                                     | LOPAC   | 11       | D   | 6      | 0.066     | 1.048           |
| 4563 | Niflumic acid                                                     | LOPAC   | 11       | E   | 6      | -0.248    | 1.109           |
| 4564 | Nimesulide                                                        | LOPAC   | 11       | F   | 6      | -0.227    | 1.261           |
| 4565 | Nialamide                                                         | LOPAC   | 11       | G   | 6      | -0.148    | 1.24            |
| 4566 | Nomifensine maleate                                               | LOPAC   | 11       | H   | 6      | -1.36     | 2.097           |
| 4567 | nor-Binaltorphimine dihydrochloride                               | LOPAC   | 11       | A   | 7      | -0.759    | 1.029           |
| 4568 | Neostigmine bromide                                               | LOPAC   | 11       | B   | 7      | -0.25     | -0.528          |
| 4569 | CR 2249                                                           | LOPAC   | 11       | C   | 7      | 0.102     | -0.97           |

SUPPLEMENTARY DATA

|      | Name                                                             | Library | Plate No | Row | Column | ROS score | viability score |
|------|------------------------------------------------------------------|---------|----------|-----|--------|-----------|-----------------|
| 4570 | S-(4-Nitrobenzyl)-L-thioinosine                                  | LOPAC   | 11       | D   | 7      | 0.304     | -1.592          |
| 4571 | Naltrexone hydrochloride                                         | LOPAC   | 11       | E   | 7      | 0.094     | -0.574          |
| 4572 | S-Nitroso-N-acetylpenicillamine                                  | LOPAC   | 11       | F   | 7      | -0.297    | 0.045           |
| 4573 | Niclosamide                                                      | LOPAC   | 11       | G   | 7      | 2.359     | -5.471          |
| 4574 | NAN-190 hydrobromide                                             | LOPAC   | 11       | H   | 7      | -0.548    | 1.135           |
| 4575 | NCS-356                                                          | LOPAC   | 11       | A   | 8      | -0.764    | 0.665           |
| 4576 | S-Nitrosoglutathione                                             | LOPAC   | 11       | B   | 8      | -0.398    | -0.453          |
| 4577 | NCS-382                                                          | LOPAC   | 11       | C   | 8      | 0.254     | -0.352          |
| 4578 | Nalidixic acid sodium                                            | LOPAC   | 11       | D   | 8      | 0.01      | 0.059           |
| 4579 | Gossypol                                                         | LOPAC   | 11       | E   | 8      | 0.383     | -0.664          |
| 4580 | 5-Nitro-2-(3-phenylpropylamino)benzoic acid                      | LOPAC   | 11       | F   | 8      | 0.381     | 0.801           |
| 4581 | AMN082                                                           | LOPAC   | 11       | G   | 8      | -0.213    | 0.108           |
| 4582 | Nordihydroguaiaretic acid from Larrea divaricata (creosote bush) | LOPAC   | 11       | H   | 8      | -1.814    | 1.094           |
| 4583 | (-)-Nicotine hydrogen tartrate salt                              | LOPAC   | 11       | A   | 9      | -1.034    | -0.514          |
| 4584 | NG-Nitro-L-arginine                                              | LOPAC   | 11       | B   | 9      | -0.807    | -0.914          |
| 4585 | Naphazoline hydrochloride                                        | LOPAC   | 11       | C   | 9      | -0.084    | -0.702          |
| 4586 | 3-Nitropropionic acid                                            | LOPAC   | 11       | D   | 9      | -0.063    | 0.074           |
| 4587 | NG-Nitro-L-arginine methyl ester hydrochloride                   | LOPAC   | 11       | E   | 9      | -0.398    | 0.188           |
| 4588 | (±)-Normetanephrine hydrochloride                                | LOPAC   | 11       | F   | 9      | -0.458    | 0.57            |
| 4589 | Nortriptyline hydrochloride                                      | LOPAC   | 11       | G   | 9      | -0.774    | 0.625           |
| 4590 | NADPH tetrasodium                                                | LOPAC   | 11       | H   | 9      | -1.624    | 1.481           |
| 4591 | Nicardipine hydrochloride                                        | LOPAC   | 11       | A   | 10     | -0.732    | 0.345           |
| 4592 | Nifedipine                                                       | LOPAC   | 11       | B   | 10     | -0.403    | -0.288          |
| 4593 | Naloxone hydrochloride                                           | LOPAC   | 11       | C   | 10     | 0.047     | -0.837          |
| 4594 | 7-Nitroindazole                                                  | LOPAC   | 11       | D   | 10     | 0.408     | -0.576          |
| 4595 | NS 521 oxalate                                                   | LOPAC   | 11       | E   | 10     | 0.08      | -0.324          |
| 4596 | CI-976                                                           | LOPAC   | 11       | F   | 10     | -0.422    | 0.793           |
| 4597 | 6-Nitroso-1,2-benzopyrone                                        | LOPAC   | 11       | G   | 10     | -0.584    | 0.46            |
| 4598 | Nilutamide                                                       | LOPAC   | 11       | H   | 10     | -0.488    | 0.33            |
| 4599 | NF 023                                                           | LOPAC   | 11       | A   | 11     | -0.705    | -0.537          |
| 4600 | Nimustine hydrochloride                                          | LOPAC   | 11       | B   | 11     | -0.226    | -1.581          |
| 4601 | Norcantharidin                                                   | LOPAC   | 11       | C   | 11     | 0.276     | -1.888          |
| 4602 | Noscapine hydrochloride                                          | LOPAC   | 11       | D   | 11     | 0.513     | -1.564          |
| 4603 | T0070907                                                         | LOPAC   | 11       | E   | 11     | -0.187    | -0.637          |
| 4604 | Naltrindole hydrochloride                                        | LOPAC   | 11       | F   | 11     | 0.048     | 0.335           |
| 4605 | Sertraline hydrochloride                                         | LOPAC   | 11       | G   | 11     | -1.281    | 0.582           |
| 4606 | NO-711 hydrochloride                                             | LOPAC   | 11       | H   | 11     | -1.104    | -0.033          |
| 4607 | Nitrendipine                                                     | LOPAC   | 12       | A   | 2      | -0.198    | -0.382          |
| 4608 | Nimodipine                                                       | LOPAC   | 12       | B   | 2      | -0.09     | -0.845          |
| 4609 | Nisoxetine hydrochloride                                         | LOPAC   | 12       | C   | 2      | -0.269    | 0.072           |
| 4610 | Nylidrin hydrochloride                                           | LOPAC   | 12       | D   | 2      | -0.478    | 0.821           |
| 4611 | SB 242084 dihydrochloride hydrate                                | LOPAC   | 12       | E   | 2      | -0.441    | 1.157           |
| 4612 | Naltiben methanesulfonate                                        | LOPAC   | 12       | F   | 2      | -0.258    | -0.035          |
| 4613 | Naltopidil dihydrochloride                                       | LOPAC   | 12       | G   | 2      | 0.03      | 0.458           |
| 4614 | Bisoprolol hemifumarate salt                                     | LOPAC   | 12       | H   | 2      | 0.1       | 0.457           |
| 4615 | Naloxone benzoylethylhydrazone                                   | LOPAC   | 12       | A   | 3      | -0.305    | 0.586           |
| 4616 | NS-1619                                                          | LOPAC   | 12       | B   | 3      | 0.141     | -1.03           |
| 4617 | Naloxonazine dihydrochloride                                     | LOPAC   | 12       | C   | 3      | 0.025     | -0.726          |
| 4618 | NBQX disodium                                                    | LOPAC   | 12       | D   | 3      | -0.08     | 0.176           |
| 4619 | NS 2028                                                          | LOPAC   | 12       | E   | 3      | -0.282    | 0.254           |
| 4620 | (±)-Octopamine hydrochloride                                     | LOPAC   | 12       | F   | 3      | -0.355    | 1.093           |
| 4621 | N-Oleylethanolamine                                              | LOPAC   | 12       | G   | 3      | 0.317     | 0.223           |
| 4622 | Oxolinic acid                                                    | LOPAC   | 12       | H   | 3      | -1.241    | 0.648           |
| 4623 | Olomoucine                                                       | LOPAC   | 12       | A   | 4      | -0.416    | 0.478           |
| 4624 | Oleic Acid                                                       | LOPAC   | 12       | B   | 4      | -0.191    | -0.56           |
| 4625 | Oxymetazoline hydrochloride                                      | LOPAC   | 12       | C   | 4      | -0.016    | -0.486          |
| 4626 | Sodium Oxamate                                                   | LOPAC   | 12       | D   | 4      | -0.043    | 0.086           |
| 4627 | Oxybutynin Chloride                                              | LOPAC   | 12       | E   | 4      | -0.347    | 0.163           |
| 4628 | Oxiracetam                                                       | LOPAC   | 12       | F   | 4      | -0.704    | -0.207          |
| 4629 | Ouabain                                                          | LOPAC   | 12       | G   | 4      | -0.417    | 0.638           |
| 4630 | ODQ                                                              | LOPAC   | 12       | H   | 4      | -0.32     | 0.888           |
| 4631 | Orphenadrine hydrochloride                                       | LOPAC   | 12       | A   | 5      | -0.581    | -0.051          |
| 4632 | TG003                                                            | LOPAC   | 12       | B   | 5      | -0.192    | -0.958          |
| 4633 | Ofloxacin                                                        | LOPAC   | 12       | C   | 5      | -0.025    | -0.603          |
| 4634 | Oxotremorine sesquifumarate salt                                 | LOPAC   | 12       | D   | 5      | -0.018    | 0.605           |
| 4635 | Trandolapril                                                     | LOPAC   | 12       | E   | 5      | -0.601    | 1.44            |
| 4636 | SB 216763                                                        | LOPAC   | 12       | F   | 5      | -0.562    | 0.582           |
| 4637 | Oxaprozin                                                        | LOPAC   | 12       | G   | 5      | -0.417    | 0.495           |
| 4638 | Oxotremorine methiodide                                          | LOPAC   | 12       | H   | 5      | -0.254    | -0.374          |
| 4639 | (±)-Octoclohepin maleate                                         | LOPAC   | 12       | A   | 6      | -0.626    | -0.484          |
| 4640 | Progesterone                                                     | LOPAC   | 12       | B   | 6      | -0.152    | 0.484           |
| 4641 | Palmitoylethanolamide                                            | LOPAC   | 12       | C   | 6      | 0.258     | -1.285          |
| 4642 | Piceatannol                                                      | LOPAC   | 12       | D   | 6      | -0.05     | 0.913           |
| 4643 | Pentamidine isethionate                                          | LOPAC   | 12       | E   | 6      | 0.089     | 0.152           |
| 4644 | TBB                                                              | LOPAC   | 12       | F   | 6      | -0.43     | 1.189           |
| 4645 | Parthenolide                                                     | LOPAC   | 12       | G   | 6      | -0.871    | 0.284           |
| 4646 | Pindolol                                                         | LOPAC   | 12       | H   | 6      | -0.753    | 1.073           |
| 4647 | O-Phospho-L-serine                                               | LOPAC   | 12       | A   | 7      | -0.433    | -0.019          |
| 4648 | (±)-Propranolol hydrochloride                                    | LOPAC   | 12       | B   | 7      | -0.332    | -0.651          |
| 4649 | SKF-525A hydrochloride                                           | LOPAC   | 12       | C   | 7      | -0.115    | -0.599          |
| 4650 | Picrotoxin                                                       | LOPAC   | 12       | D   | 7      | 0.154     | -0.079          |
| 4651 | LP34                                                             | LOPAC   | 12       | E   | 7      | 0.027     | 0.785           |
| 4652 | Pentoxifylline                                                   | LOPAC   | 12       | F   | 7      | -0.464    | 1.467           |
| 4653 | Pimozide                                                         | LOPAC   | 12       | G   | 7      | -0.583    | 0.718           |
| 4654 | L-Glutamic acid, N-phthaloyl-                                    | LOPAC   | 12       | H   | 7      | -1.05     | 1.51            |
| 4655 | Pancuronium bromide                                              | LOPAC   | 12       | A   | 8      | -0.689    | -0.636          |
| 4656 | 3- $\alpha$ ,21-Dihydroxy-5- $\alpha$ -pregnan-20-one            | LOPAC   | 12       | B   | 8      | -0.472    | -0.912          |
| 4657 | Pirfenidone                                                      | LOPAC   | 12       | C   | 8      | -0.015    | -0.83           |
| 4658 | 1,3-Dimethyl-8-phenylxanthine                                    | LOPAC   | 12       | D   | 8      | -0.2      | -0.111          |
| 4659 | PRE-084                                                          | LOPAC   | 12       | E   | 8      | -0.193    | 1.162           |
| 4660 | PFNS tetrasodium                                                 | LOPAC   | 12       | F   | 8      | -0.576    | 0.374           |
| 4661 | AS605240                                                         | LOPAC   | 12       | G   | 8      | -1.098    | -4.942          |
| 4662 | Papaverine hydrochloride                                         | LOPAC   | 12       | H   | 8      | -0.631    | -2.089          |
| 4663 | Pentolinium di(L(+)-tartrate)                                    | LOPAC   | 12       | A   | 9      | -0.787    | 0.171           |
| 4664 | 1-Phenyl-3-(2-thiazolyl)-2-thiourea                              | LOPAC   | 12       | B   | 9      | -0.4      | -0.841          |
| 4665 | Thiolactomycin                                                   | LOPAC   | 12       | C   | 9      | 0.025     | -0.438          |
| 4666 | Cisplatin                                                        | LOPAC   | 12       | D   | 9      | -0.117    | -0.103          |
| 4667 | Podophyllotoxin                                                  | LOPAC   | 12       | E   | 9      | 1.191     | -2.193          |
| 4668 | NU2058                                                           | LOPAC   | 12       | F   | 9      | 0.252     | 0.389           |
| 4669 | Palmitoyl-DL-Carnitine chloride                                  | LOPAC   | 12       | G   | 9      | -0.341    | 1.17            |
| 4670 | R(-)-N6-(2-Phenylisopropyl)adenosine                             | LOPAC   | 12       | H   | 9      | -1.215    | -0.239          |
| 4671 | Valproic acid sodium                                             | LOPAC   | 12       | A   | 10     | 0.12      | -0.502          |
| 4672 | Promethazine hydrochloride                                       | LOPAC   | 12       | B   | 10     | -0.308    | -0.598          |
| 4673 | Praziquantel                                                     | LOPAC   | 12       | C   | 10     | 0.523     | -0.26           |
| 4674 | Propafenone hydrochloride                                        | LOPAC   | 12       | D   | 10     | -0.371    | 1.353           |



SUPPLEMENTARY DATA

|      | Name                                                                     | Library | Plate No | Row | Column | ROS score | viability score |
|------|--------------------------------------------------------------------------|---------|----------|-----|--------|-----------|-----------------|
| 4675 | Salpha-Pregnan-3alpha-ol-11,20-dione                                     | LOPAC   | 12       | E   | 10     | -0.515    | 0.616           |
| 4676 | PNU-282987                                                               | LOPAC   | 12       | F   | 10     | -0.127    | 0.599           |
| 4677 | Piracetam                                                                | LOPAC   | 12       | G   | 10     | -0.877    | 0.854           |
| 4678 | Phosphomycin disodium                                                    | LOPAC   | 12       | H   | 10     | -0.318    | 1.823           |
| 4679 | Pyrimidine maleate                                                       | LOPAC   | 12       | A   | 11     | 0.008     | -1.41           |
| 4680 | Piroxicam                                                                | LOPAC   | 12       | B   | 11     | 0.361     | -1.422          |
| 4681 | 3-n-Propylxanthine                                                       | LOPAC   | 12       | C   | 11     | 0.284     | -1.314          |
| 4682 | Phenylephrine hydrochloride                                              | LOPAC   | 12       | D   | 11     | 0.139     | -0.514          |
| 4683 | Perphenazine                                                             | LOPAC   | 12       | E   | 11     | 0.367     | 0.641           |
| 4684 | Pentylentetrazole                                                        | LOPAC   | 12       | F   | 11     | 0.292     | 0.239           |
| 4685 | (+)-Pilocarpine hydrochloride                                            | LOPAC   | 12       | G   | 11     | -0.204    | -0.171          |
| 4686 | Pilocarpine nitrate                                                      | LOPAC   | 12       | H   | 11     | -0.458    | -0.448          |
| 4687 | Promazine hydrochloride                                                  | LOPAC   | 13       | A   | 2      | -0.03     | -0.059          |
| 4688 | Phenelzine sulfate                                                       | LOPAC   | 13       | B   | 2      | -0.878    | -0.015          |
| 4689 | Pheniramine maleate                                                      | LOPAC   | 13       | C   | 2      | -0.078    | -0.099          |
| 4690 | Phosphonoacetic acid                                                     | LOPAC   | 13       | D   | 2      | -0.138    | -0.008          |
| 4691 | (1S)-Perillic acid                                                       | LOPAC   | 13       | E   | 2      | 0.351     | -0.991          |
| 4692 | Pyrazinocarboxamide                                                      | LOPAC   | 13       | F   | 2      | -0.384    | 0.358           |
| 4693 | Primidone                                                                | LOPAC   | 13       | G   | 2      | 0.031     | 0.176           |
| 4694 | (±)-threo-1-Phenyl-2-decanoylamino-3-morpholino-1-propanol hydrochloride | LOPAC   | 13       | H   | 2      | -0.821    | 1.33            |
| 4695 | Pirenzepine dihydrochloride                                              | LOPAC   | 13       | A   | 3      | -1.393    | 0.252           |
| 4696 | Putrescine dihydrochloride                                               | LOPAC   | 13       | B   | 3      | -0.767    | -0.071          |
| 4697 | Phentolamine mesylate                                                    | LOPAC   | 13       | C   | 3      | -0.008    | -0.313          |
| 4698 | Propionylpromazine hydrochloride                                         | LOPAC   | 13       | D   | 3      | 0.189     | -0.475          |
| 4699 | Prazosin hydrochloride                                                   | LOPAC   | 13       | E   | 3      | 0.387     | 0.614           |
| 4700 | Phloretin                                                                | LOPAC   | 13       | F   | 3      | 0.302     | -0.089          |
| 4701 | Pargyline hydrochloride                                                  | LOPAC   | 13       | G   | 3      | 0.185     | 0.585           |
| 4702 | Phorbol 12-myristate 13-acetate                                          | LOPAC   | 13       | H   | 3      | 0.778     | -0.977          |
| 4703 | ARP 101                                                                  | LOPAC   | 13       | A   | 4      | -0.719    | 1.116           |
| 4704 | Protoporphyrin IX disodium                                               | LOPAC   | 13       | B   | 4      | -0.612    | 0.313           |
| 4705 | 1,4-PBT dihydrobromide                                                   | LOPAC   | 13       | C   | 4      | 0.071     | -0.08           |
| 4706 | Phenylbutazone                                                           | LOPAC   | 13       | D   | 4      | 0.091     | -0.46           |
| 4707 | Picotamide                                                               | LOPAC   | 13       | E   | 4      | 0.187     | -0.361          |
| 4708 | Tranlycypromine hydrochloride                                            | LOPAC   | 13       | F   | 4      | 0.127     | -0.517          |
| 4709 | (S)-Propranolol hydrochloride                                            | LOPAC   | 13       | G   | 4      | -0.211    | 0.377           |
| 4710 | Ammonium pyrrolidinedithiocarbamate                                      | LOPAC   | 13       | H   | 4      | -0.158    | 1               |
| 4711 | (±)-cis-Piperidine-2,3-dicarboxylic acid                                 | LOPAC   | 13       | A   | 5      | -0.998    | 0.486           |
| 4712 | Protriptyline hydrochloride                                              | LOPAC   | 13       | B   | 5      | -0.171    | 0.477           |
| 4713 | Pergolide methanesulfonate                                               | LOPAC   | 13       | C   | 5      | -0.352    | -0.045          |
| 4714 | 6(SH)-Phenanthridinone                                                   | LOPAC   | 13       | D   | 5      | 0.302     | -0.483          |
| 4715 | Salpha-Pregnan-3alpha-ol-20-one                                          | LOPAC   | 13       | E   | 5      | 0.431     | -1.032          |
| 4716 | Propranolol bromide                                                      | LOPAC   | 13       | F   | 5      | 0.481     | -0.488          |
| 4717 | K114                                                                     | LOPAC   | 13       | G   | 5      | 0.211     | 0.133           |
| 4718 | Prochlorperazine dimaleate                                               | LOPAC   | 13       | H   | 5      | -0.998    | 0.505           |
| 4719 | Pinbedil maleate                                                         | LOPAC   | 13       | A   | 6      | -1.133    | 1.131           |
| 4720 | Paromomycin sulfate                                                      | LOPAC   | 13       | B   | 6      | -1.164    | -0.338          |
| 4721 | 1,10-Phenanthroline monohydrate                                          | LOPAC   | 13       | C   | 6      | 0.485     | -0.347          |
| 4722 | Procainamide hydrochloride                                               | LOPAC   | 13       | D   | 6      | -0.406    | 0.618           |
| 4723 | Pilocarpine hydrochloride                                                | LOPAC   | 13       | E   | 6      | 0.851     | -0.121          |
| 4724 | Propentofylline                                                          | LOPAC   | 13       | F   | 6      | 0.467     | 0.642           |
| 4725 | Ziprasidone hydrochloride monohydrate                                    | LOPAC   | 13       | G   | 6      | 0.807     | 0.324           |
| 4726 | Pvridostigmine bromide                                                   | LOPAC   | 13       | H   | 6      | -0.595    | 0.292           |
| 4727 | Procaine hydrochloride                                                   | LOPAC   | 13       | A   | 7      | -1.133    | 0.323           |
| 4728 | 2-Phenylaminoadenosine                                                   | LOPAC   | 13       | B   | 7      | -0.653    | 0.356           |
| 4729 | R(+)-3PPP hydrochloride                                                  | LOPAC   | 13       | C   | 7      | -0.627    | 0.735           |
| 4730 | S(-)-3PPP hydrochloride                                                  | LOPAC   | 13       | D   | 7      | -0.188    | -0.817          |
| 4731 | (±)-PPHT hydrochloride                                                   | LOPAC   | 13       | E   | 7      | 0.099     | -0.011          |
| 4732 | Org 27569                                                                | LOPAC   | 13       | F   | 7      | 0.136     | -0.101          |
| 4733 | Bicalutamide (CDX)                                                       | LOPAC   | 13       | G   | 7      | -0.054    | -0.493          |
| 4734 | Enalaprilat dihydrate                                                    | LOPAC   | 13       | H   | 7      | -0.563    | 0.713           |
| 4735 | Phaclofen                                                                | LOPAC   | 13       | A   | 8      | -1.26     | 0.815           |
| 4736 | BF-170 hydrochloride                                                     | LOPAC   | 13       | B   | 8      | -1.056    | 0.217           |
| 4737 | 1-Phenylbiguanide                                                        | LOPAC   | 13       | C   | 8      | -0.461    | -0.072          |
| 4738 | SID7969543                                                               | LOPAC   | 13       | D   | 8      | -0.105    | -0.219          |
| 4739 | Pirenperone                                                              | LOPAC   | 13       | E   | 8      | -0.264    | -0.473          |
| 4740 | IC 261                                                                   | LOPAC   | 13       | F   | 8      | 0.049     | -0.683          |
| 4741 | A3 hydrochloride                                                         | LOPAC   | 13       | G   | 8      | -0.407    | -0.649          |
| 4742 | Pinacidil                                                                | LOPAC   | 13       | H   | 8      | -0.796    | 0.09            |
| 4743 | Pregnenolone sulfate sodium                                              | LOPAC   | 13       | A   | 9      | -1.11     | 3.126           |
| 4744 | PPADS                                                                    | LOPAC   | 13       | B   | 9      | -1.1      | 1.43            |
| 4745 | S(+)-PD 128,907 hydrochloride                                            | LOPAC   | 13       | C   | 9      | -0.561    | 0.185           |
| 4746 | Phenamil methanesulfonate                                                | LOPAC   | 13       | D   | 9      | -0.342    | -0.728          |
| 4747 | Phenylbenzene-omega-phosphono-alpha-amino acid                           | LOPAC   | 13       | E   | 9      | -0.121    | 0.384           |
| 4748 | Bay 11-7082                                                              | LOPAC   | 13       | F   | 9      | 0.207     | -3.723          |
| 4749 | PD 98,059                                                                | LOPAC   | 13       | G   | 9      | -0.146    | -0.979          |
| 4750 | (±)-PD 128,907 hydrochloride                                             | LOPAC   | 13       | H   | 9      | -0.359    | 1.087           |
| 4751 | PD 168,077 maleate                                                       | LOPAC   | 13       | A   | 10     | -1.211    | 0.875           |
| 4752 | SU 6656                                                                  | LOPAC   | 13       | B   | 10     | -0.968    | 0.484           |
| 4753 | Quinolinic acid                                                          | LOPAC   | 13       | C   | 10     | -0.006    | 0.018           |
| 4754 | Quercetin dihydrate                                                      | LOPAC   | 13       | D   | 10     | 0.316     | -1.438          |
| 4755 | Quinidine sulfate                                                        | LOPAC   | 13       | E   | 10     | 0.05      | -2.05           |
| 4756 | SMER28                                                                   | LOPAC   | 13       | F   | 10     | 0.395     | -3.899          |
| 4757 | Quinine sulfate                                                          | LOPAC   | 13       | G   | 10     | -0.278    | -1.18           |
| 4758 | (+)-Quisqualic acid                                                      | LOPAC   | 13       | H   | 10     | -0.501    | -0.528          |
| 4759 | Quinacrine dihydrochloride                                               | LOPAC   | 13       | A   | 11     | -0.008    | 1.6             |
| 4760 | Quazinine                                                                | LOPAC   | 13       | B   | 11     | -0.485    | 1.885           |
| 4761 | (-)-Quinpirole hydrochloride                                             | LOPAC   | 13       | C   | 11     | -0.439    | 1.27            |
| 4762 | LP 12 hydrochloride hydrate                                              | LOPAC   | 13       | D   | 11     | -0.24     | 0.895           |
| 4763 | Quipazine, 6-nitro-, maleate                                             | LOPAC   | 13       | E   | 11     | 0.301     | -0.134          |
| 4764 | Quinelorane dihydrochloride                                              | LOPAC   | 13       | F   | 11     | -0.085    | -0.57           |
| 4765 | (±)-Quinpirole dihydrochloride                                           | LOPAC   | 13       | G   | 11     | -0.011    | -0.911          |
| 4766 | Cortexolone                                                              | LOPAC   | 13       | H   | 11     | -0.898    | -0.335          |
| 4767 | Ritodrine hydrochloride                                                  | LOPAC   | 14       | A   | 2      | -0.642    | -0.123          |
| 4768 | Raloxifene hydrochloride                                                 | LOPAC   | 14       | B   | 2      | -0.322    | -0.788          |
| 4769 | Retinoic acid                                                            | LOPAC   | 14       | C   | 2      | 0.568     | 0.55            |
| 4770 | Ruthenium red                                                            | LOPAC   | 14       | D   | 2      | -5.527    | -0.051          |
| 4771 | 13-cis-retinoic acid                                                     | LOPAC   | 14       | E   | 2      | 0.351     | 0.166           |
| 4772 | Rutaecarpine                                                             | LOPAC   | 14       | F   | 2      | -0.362    | 1.874           |
| 4773 | Ropinirole hydrochloride                                                 | LOPAC   | 14       | G   | 2      | -0.434    | 0.303           |
| 4774 | Resveratrol                                                              | LOPAC   | 14       | H   | 2      | 0.037     | -0.883          |
| 4775 | REV 5901                                                                 | LOPAC   | 14       | A   | 3      | -0.445    | 0.098           |
| 4776 | Rottlerin                                                                | LOPAC   | 14       | B   | 3      | 0.041     | -0.244          |
| 4777 | Ranolazine dihydrochloride                                               | LOPAC   | 14       | C   | 3      | 0.264     | 0.757           |
| 4778 | Rolipram                                                                 | LOPAC   | 14       | D   | 3      | -0.151    | 0.77            |
| 4779 | Ro 25-6981 hydrochloride                                                 | LOPAC   | 14       | E   | 3      | -0.281    | 0.588           |

SUPPLEMENTARY DATA

|      | Name                                        | Library | Plate No | Row | Column | ROS score | viability score |
|------|---------------------------------------------|---------|----------|-----|--------|-----------|-----------------|
| 4780 | Phosphoramidon disodium                     | LOPAC   | 14       | F   | 3      | -0.001    | 1.448           |
| 4781 | BIA 2-093                                   | LOPAC   | 14       | G   | 3      | -0.732    | 1.112           |
| 4782 | Rotenone                                    | LOPAC   | 14       | H   | 3      | 1.893     | -5.789          |
| 4783 | Ro 8-4304                                   | LOPAC   | 14       | A   | 4      | -0.803    | 0.534           |
| 4784 | RX 821002 hydrochloride                     | LOPAC   | 14       | B   | 4      | -0.412    | 0.144           |
| 4785 | Ribavirin                                   | LOPAC   | 14       | C   | 4      | 0.277     | 0.069           |
| 4786 | Ranitidine hydrochloride                    | LOPAC   | 14       | D   | 4      | -0.348    | -0.553          |
| 4787 | Ritanserin                                  | LOPAC   | 14       | E   | 4      | -0.027    | -0.048          |
| 4788 | Rauwolfscine hydrochloride                  | LOPAC   | 14       | F   | 4      | -0.319    | 0.34            |
| 4789 | Ibandronate sodium                          | LOPAC   | 14       | G   | 4      | -0.393    | -0.221          |
| 4790 | Ro 41-1049 hydrochloride                    | LOPAC   | 14       | H   | 4      | -0.495    | 0.041           |
| 4791 | Ro 41-0960                                  | LOPAC   | 14       | A   | 5      | -0.422    | 0.853           |
| 4792 | Reactive Blue 2                             | LOPAC   | 14       | B   | 5      | -1.085    | 0.128           |
| 4793 | Riluzole                                    | LOPAC   | 14       | C   | 5      | -0.194    | -0.854          |
| 4794 | Steviol                                     | LOPAC   | 14       | D   | 5      | 0.082     | 0.144           |
| 4795 | S(+)-Flaclopride L-tartrate                 | LOPAC   | 14       | E   | 5      | -0.477    | 1.251           |
| 4796 | Sobuzoxane                                  | LOPAC   | 14       | F   | 5      | -0.33     | 0.294           |
| 4797 | Rilmemidine hemifumarate                    | LOPAC   | 14       | G   | 5      | -0.457    | 0.288           |
| 4798 | Tizanidine hydrochloride                    | LOPAC   | 14       | H   | 5      | -0.784    | 0.935           |
| 4799 | Ro 04-8790 dihydrochloride                  | LOPAC   | 14       | A   | 6      | -1.098    | 0.887           |
| 4800 | (±)-Solzolo hydrochloride                   | LOPAC   | 14       | B   | 6      | -0.525    | 0.854           |
| 4801 | SB-366791                                   | LOPAC   | 14       | C   | 6      | -0.082    | 0.897           |
| 4802 | Sodium nitroprusside dihydrate              | LOPAC   | 14       | D   | 6      | -0.427    | 0.347           |
| 4803 | (±)-Synephrine                              | LOPAC   | 14       | E   | 6      | -0.356    | 0.335           |
| 4804 | Sulfaphenazole                              | LOPAC   | 14       | F   | 6      | -0.194    | 0.38            |
| 4805 | N2-Ethyl-2'-deoxyguanosine                  | LOPAC   | 14       | G   | 6      | -0.429    | -0.152          |
| 4806 | Sulindac sulfone                            | LOPAC   | 14       | H   | 6      | -0.882    | 0.981           |
| 4807 | Auranofin                                   | LOPAC   | 14       | A   | 7      | -0.841    | -0.945          |
| 4808 | SKF 86466                                   | LOPAC   | 14       | B   | 7      | -0.582    | -0.538          |
| 4809 | SR 57227A                                   | LOPAC   | 14       | C   | 7      | -0.288    | -0.653          |
| 4810 | (-) Scopolamine hydrobromide                | LOPAC   | 14       | D   | 7      | 0.441     | -1.188          |
| 4811 | Tetrabenzazine                              | LOPAC   | 14       | E   | 7      | 0.311     | -1.089          |
| 4812 | Semicarbazide hydrochloride                 | LOPAC   | 14       | F   | 7      | -0.202    | -0.485          |
| 4813 | (-) Scopolamine methyl nitrate              | LOPAC   | 14       | G   | 7      | -0.885    | -0.817          |
| 4814 | DL-Stearoylcarnitine chloride               | LOPAC   | 14       | H   | 7      | -0.59     | -0.488          |
| 4815 | Spermidine trihydrochloride                 | LOPAC   | 14       | A   | 8      | -0.718    | -0.214          |
| 4816 | SNC80                                       | LOPAC   | 14       | B   | 8      | -0.147    | -1.194          |
| 4817 | SKF 83859 hydrobromide                      | LOPAC   | 14       | C   | 8      | -0.048    | -1.11           |
| 4818 | Spermine tetrahydrochloride                 | LOPAC   | 14       | D   | 8      | -0.051    | -1.033          |
| 4819 | SKF 75670 hydrobromide                      | LOPAC   | 14       | E   | 8      | -0.014    | -0.354          |
| 4820 | SC 19220                                    | LOPAC   | 14       | F   | 8      | -0.533    | -0.305          |
| 4821 | SKF 89626                                   | LOPAC   | 14       | G   | 8      | -0.401    | -0.247          |
| 4822 | AGK2                                        | LOPAC   | 14       | H   | 8      | -0.353    | 1.618           |
| 4823 | Stattic                                     | LOPAC   | 14       | A   | 9      | -0.152    | 0.399           |
| 4824 | N-Oleoyldopamine                            | LOPAC   | 14       | B   | 9      | 0.558     | -1.645          |
| 4825 | Spironolactone                              | LOPAC   | 14       | C   | 9      | 0.482     | 0.258           |
| 4826 | SCN-202676 hydrobromide                     | LOPAC   | 14       | D   | 9      | 0.188     | -0.137          |
| 4827 | D-Serine                                    | LOPAC   | 14       | E   | 9      | -0.088    | -0.308          |
| 4828 | Albuterol hemisulfate                       | LOPAC   | 14       | F   | 9      | 0.471     | 0.253           |
| 4829 | Sanguinarine chloride                       | LOPAC   | 14       | G   | 9      | 0.184     | 1.8             |
| 4830 | N-Succinyl-L-proline                        | LOPAC   | 14       | H   | 9      | -1.481    | 0.37            |
| 4831 | IRAK-1/4 Inhibitor 1                        | LOPAC   | 14       | A   | 10     | 0.843     | -0.92           |
| 4832 | SB 269970 hydrochloride                     | LOPAC   | 14       | B   | 10     | 0.288     | 0.001           |
| 4833 | Spiperone hydrochloride                     | LOPAC   | 14       | C   | 10     | 0.784     | -1.757          |
| 4834 | SR 2640                                     | LOPAC   | 14       | D   | 10     | 1.042     | -0.212          |
| 4835 | (-) Sulpiride                               | LOPAC   | 14       | E   | 10     | 0.288     | -0.2            |
| 4836 | SKF 96365                                   | LOPAC   | 14       | F   | 10     | 0.882     | 0.34            |
| 4837 | (-) Scopolamine, n-Butyl-, bromide          | LOPAC   | 14       | G   | 10     | -0.049    | 1.008           |
| 4838 | SB 205384                                   | LOPAC   | 14       | H   | 10     | -0.958    | 1.359           |
| 4839 | (±)-Sulpiride                               | LOPAC   | 14       | A   | 11     | 0.484     | -0.88           |
| 4840 | CV-3988                                     | LOPAC   | 14       | B   | 11     | 0.348     | -0.583          |
| 4841 | Sulindac                                    | LOPAC   | 14       | C   | 11     | 1.701     | -0.281          |
| 4842 | Succinylcholine chloride                    | LOPAC   | 14       | D   | 11     | 1.01      | -0.377          |
| 4843 | IMS2186                                     | LOPAC   | 14       | E   | 11     | 0.802     | 0.126           |
| 4844 | Salmeterol xinafoate                        | LOPAC   | 14       | F   | 11     | 0.612     | 0.789           |
| 4845 | SU 5416                                     | LOPAC   | 14       | G   | 11     | -0.302    | 0.735           |
| 4846 | (-) Scopolamine methyl bromide              | LOPAC   | 14       | H   | 11     | -1.004    | 0.855           |
| 4847 | SU 4312                                     | LOPAC   | 15       | A   | 2      | -0.852    | 0.748           |
| 4848 | SR 59230A oxalate                           | LOPAC   | 15       | B   | 2      | -1.083    | 1.255           |
| 4849 | BRL 52537 hydrochloride                     | LOPAC   | 15       | C   | 2      | -0.321    | 1.302           |
| 4850 | SKF 89976A hydrochloride                    | LOPAC   | 15       | D   | 2      | -0.034    | 0.282           |
| 4851 | SIB 1757                                    | LOPAC   | 15       | E   | 2      | -0.251    | 0.429           |
| 4852 | SIB 1893                                    | LOPAC   | 15       | F   | 2      | -0.04     | 0.171           |
| 4853 | 1-(1-Naphthyl)piperazine hydrochloride      | LOPAC   | 15       | G   | 2      | -0.777    | 1.688           |
| 4854 | Ketanserin tartrate                         | LOPAC   | 15       | H   | 2      | -0.129    | -0.316          |
| 4855 | 1-(2-Methoxyphenyl)piperazine hydrochloride | LOPAC   | 15       | A   | 3      | -0.734    | 0.272           |
| 4856 | PAPP                                        | LOPAC   | 15       | B   | 3      | -0.682    | 0.203           |
| 4857 | Spiroxitrine                                | LOPAC   | 15       | C   | 3      | -0.426    | 0.289           |
| 4858 | SR-95531                                    | LOPAC   | 15       | D   | 3      | 0.071     | 0.695           |
| 4859 | (±)-6-Chloro-PB hydrobromide                | LOPAC   | 15       | E   | 3      | -0.608    | 0.079           |
| 4860 | L-Beta-threo-benzyl-aspartate               | LOPAC   | 15       | F   | 3      | 0.049     | 0.445           |
| 4861 | Suramin sodium salt                         | LOPAC   | 15       | G   | 3      | -0.375    | 0.582           |
| 4862 | SQ 22536                                    | LOPAC   | 15       | H   | 3      | -0.44     | 0.565           |
| 4863 | Sepiapterin                                 | LOPAC   | 15       | A   | 4      | -1.276    | 0.137           |
| 4864 | Amisulpride                                 | LOPAC   | 15       | B   | 4      | -0.165    | 1.388           |
| 4865 | (±)-SKF 38393, N-allyl-, hydrobromide       | LOPAC   | 15       | C   | 4      | -0.154    | -0.243          |
| 4866 | SDZ-205.567 hydrochloride                   | LOPAC   | 15       | D   | 4      | -0.064    | -0.412          |
| 4867 | SB 206553 hydrochloride                     | LOPAC   | 15       | E   | 4      | -0.126    | 0.885           |
| 4868 | Granisetron hydrochloride                   | LOPAC   | 15       | F   | 4      | 0.093     | 1.037           |
| 4869 | L-Tryptophan                                | LOPAC   | 15       | G   | 4      | -0.788    | 0.893           |
| 4870 | Tranilast                                   | LOPAC   | 15       | H   | 4      | -0.617    | -0.205          |
| 4871 | Tiapride hydrochloride                      | LOPAC   | 15       | A   | 5      | -0.704    | 1.143           |
| 4872 | Taurine                                     | LOPAC   | 15       | B   | 5      | -0.709    | 0.601           |
| 4873 | FAUC 213                                    | LOPAC   | 15       | C   | 5      | 0.101     | -0.486          |
| 4874 | Tolbutamide                                 | LOPAC   | 15       | D   | 5      | 0.02      | 0.25            |
| 4875 | Tetraethylthiuram disulfide                 | LOPAC   | 15       | E   | 5      | -0.404    | 0.881           |
| 4876 | TCPOBOP                                     | LOPAC   | 15       | F   | 5      | -0.172    | 0.115           |
| 4877 | Tetraisopropyl pyrophosphoramidate          | LOPAC   | 15       | G   | 5      | -0.159    | -0.183          |
| 4878 | Tetramisole hydrochloride                   | LOPAC   | 15       | H   | 5      | -0.613    | 0.148           |
| 4879 | Trihexyphenidyl hydrochloride               | LOPAC   | 15       | A   | 6      | -0.391    | 2.283           |
| 4880 | Theophylline                                | LOPAC   | 15       | B   | 6      | -0.478    | 0.497           |
| 4881 | (E)-4-amino-2-butenoic acid                 | LOPAC   | 15       | C   | 6      | 0.088     | 0.548           |
| 4882 | Tetradecylthioacetic acid                   | LOPAC   | 15       | D   | 6      | 0.161     | 0.351           |
| 4883 | Trequinsin hydrochloride                    | LOPAC   | 15       | E   | 6      | -0.105    | -0.686          |
| 4884 | Tyrphostin AG 879                           | LOPAC   | 15       | F   | 6      | 0.465     | -1.386          |



SUPPLEMENTARY DATA

|      | Name                                                           | Library | Plate No | Row | Column | ROS score | viability score |
|------|----------------------------------------------------------------|---------|----------|-----|--------|-----------|-----------------|
| 4885 | Tetraethylammonium chloride                                    | LOPAC   | 15       | G   | 6      | -0.693    | -0.372          |
| 4886 | Tolazamide                                                     | LOPAC   | 15       | H   | 6      | -0.328    | -0.377          |
| 4887 | Terbutaline hemisulfate                                        | LOPAC   | 15       | A   | 7      | -0.225    | -0.787          |
| 4888 | 4-Hydroxyphenethylamine hydrochloride                          | LOPAC   | 15       | B   | 7      | -0.181    | -0.219          |
| 4889 | Triflupromazine hydrochloride                                  | LOPAC   | 15       | C   | 7      | 0.471     | -0.531          |
| 4890 | Trimipramine maleate                                           | LOPAC   | 15       | D   | 7      | 0.335     | -0.559          |
| 4891 | Tyrphostin AG 490                                              | LOPAC   | 15       | E   | 7      | -0.194    | -0.364          |
| 4892 | TTNPB                                                          | LOPAC   | 15       | F   | 7      | 1.334     | -0.971          |
| 4893 | L-765,314                                                      | LOPAC   | 15       | G   | 7      | 0.105     | 0.443           |
| 4894 | Triamterene                                                    | LOPAC   | 15       | H   | 7      | -1        | -0.201          |
| 4895 | Tyrphostin AG 1478                                             | LOPAC   | 15       | A   | 8      | -0.313    | 0.319           |
| 4896 | Tetrahydrozoline hydrochloride                                 | LOPAC   | 15       | B   | 8      | 0.221     | 0.141           |
| 4897 | Tyrphostin AG 434                                              | LOPAC   | 15       | C   | 8      | -0.254    | -1.173          |
| 4898 | N-p-Tosyl-L-phenylalanine chloromethyl ketone                  | LOPAC   | 15       | D   | 8      | -0.381    | 1.157           |
| 4899 | (6R)-5,6,7,8-Tetrahydro-L-biopterin hydrochloride              | LOPAC   | 15       | E   | 8      | 0.051     | -0.035          |
| 4900 | cDPCP                                                          | LOPAC   | 15       | F   | 8      | -0.372    | 0.385           |
| 4901 | Theobromine                                                    | LOPAC   | 15       | G   | 8      | -0.917    | 1.714           |
| 4902 | (±)-Taxifolin                                                  | LOPAC   | 15       | H   | 8      | -1.374    | 1.241           |
| 4903 | BIX 01294 trihydrochloride hydrate                             | LOPAC   | 15       | A   | 9      | 0.623     | -2.641          |
| 4904 | Terazosin hydrochloride                                        | LOPAC   | 15       | B   | 9      | -0.378    | 0.783           |
| 4905 | Tyrphostin AG 537                                              | LOPAC   | 15       | C   | 9      | 0.384     | -0.04           |
| 4906 | Tyrphostin AG 555                                              | LOPAC   | 15       | D   | 9      | 0.497     | -1.492          |
| 4907 | Tyrphostin AG 698                                              | LOPAC   | 15       | E   | 9      | 0.559     | -1.182          |
| 4908 | NSC348884 hydrate                                              | LOPAC   | 15       | F   | 9      | 0.043     | -0.87           |
| 4909 | Thio-NADP sodium                                               | LOPAC   | 15       | G   | 9      | -0.583    | 0.348           |
| 4910 | Tyrphostin AG 835                                              | LOPAC   | 15       | H   | 9      | -1.024    | 0.91            |
| 4911 | (±)-alpha-Lipoic Acid                                          | LOPAC   | 15       | A   | 10     | -0.225    | -0.303          |
| 4912 | DL-Thiorphan                                                   | LOPAC   | 15       | B   | 10     | -0.117    | -0.563          |
| 4913 | Tulobuterol hydrochloride                                      | LOPAC   | 15       | C   | 10     | 0.001     | -0.74           |
| 4914 | Trazodone hydrochloride                                        | LOPAC   | 15       | D   | 10     | 0.083     | -0.452          |
| 4915 | BAY 61-3606 hydrochloride hydrate                              | LOPAC   | 15       | E   | 10     | 0.566     | -2.709          |
| 4916 | Triamcinolone                                                  | LOPAC   | 15       | F   | 10     | 0.398     | 2.432           |
| 4917 | S(-)-Timolol maleate                                           | LOPAC   | 15       | G   | 10     | -0.786    | 0.809           |
| 4918 | N,N,N-trimethyl-1-(4-trans-stilbenoxy)-2-propylammonium iodide | LOPAC   | 15       | H   | 10     | -0.985    | -0.152          |
| 4919 | Triprolidine hydrochloride                                     | LOPAC   | 15       | A   | 11     | 0.383     | -1.505          |
| 4920 | Tyrphostin AG 112                                              | LOPAC   | 15       | B   | 11     | 0.179     | -1.215          |
| 4921 | Tyrphostin 1                                                   | LOPAC   | 15       | C   | 11     | 0.618     | -1.822          |
| 4922 | Tyrphostin 23                                                  | LOPAC   | 15       | D   | 11     | 0.789     | -2.665          |
| 4923 | Pifithrin-mu                                                   | LOPAC   | 15       | E   | 11     | -0.362    | -0.204          |
| 4924 | Na-p-Tosyl-L-lysine chloromethyl ketone hydrochloride          | LOPAC   | 15       | F   | 11     | 0.113     | -1.251          |
| 4925 | Aprindine hydrochloride                                        | LOPAC   | 15       | G   | 11     | -0.338    | -0.752          |
| 4926 | 1-[2-(Trifluoromethyl)phenyl]imidazole                         | LOPAC   | 15       | H   | 11     | -1.032    | -0.559          |
| 4927 | Taxol                                                          | LOPAC   | 16       | A   | 2      | 0.378     | -2.259          |
| 4928 | Tetracaine hydrochloride                                       | LOPAC   | 16       | B   | 2      | -0.124    | -0.323          |
| 4929 | Tyrphostin 47                                                  | LOPAC   | 16       | C   | 2      | 0.013     | -0.045          |
| 4930 | Tyrphostin 51                                                  | LOPAC   | 16       | D   | 2      | -0.226    | 0.506           |
| 4931 | PAC-1                                                          | LOPAC   | 16       | E   | 2      | -0.01     | -0.008          |
| 4932 | l-OMe-Tyrphostin AG 538                                        | LOPAC   | 16       | F   | 2      | -0.722    | 0.8             |
| 4933 | Tyrphostin AG 538                                              | LOPAC   | 16       | G   | 2      | -0.791    | 0.879           |
| 4934 | Trimethoprim                                                   | LOPAC   | 16       | H   | 2      | -1.588    | 1.593           |
| 4935 | Tomoxetine                                                     | LOPAC   | 16       | A   | 3      | -0.645    | -0.488          |
| 4936 | NU6027                                                         | LOPAC   | 16       | B   | 3      | -0.539    | -0.193          |
| 4937 | 3-Tropanyl-3,5-dichlorobenzoate                                | LOPAC   | 16       | C   | 3      | 0.107     | -0.413          |
| 4938 | Trifluoperazine dihydrochloride                                | LOPAC   | 16       | D   | 3      | 0.188     | 0.324           |
| 4939 | D-609 potassium                                                | LOPAC   | 16       | E   | 3      | 0.119     | 0.217           |
| 4940 | Thioridazine hydrochloride                                     | LOPAC   | 16       | F   | 3      | -0.411    | 0.858           |
| 4941 | Thapsigargin                                                   | LOPAC   | 16       | G   | 3      | 1.05      | -3.818          |
| 4942 | IPA-3                                                          | LOPAC   | 16       | H   | 3      | -1.345    | 0.96            |
| 4943 | Tamoxifen citrate                                              | LOPAC   | 16       | A   | 4      | -0.921    | 1.581           |
| 4944 | Terfenadine                                                    | LOPAC   | 16       | B   | 4      | 0.295     | -0.719          |
| 4945 | Tropicamide                                                    | LOPAC   | 16       | C   | 4      | -0.016    | -0.85           |
| 4946 | THIP hydrochloride                                             | LOPAC   | 16       | D   | 4      | 0.176     | 0.021           |
| 4947 | Trifluoperidol hydrochloride                                   | LOPAC   | 16       | E   | 4      | 0.097     | -0.603          |
| 4948 | 3-Tropanyl-indole-3-carboxylate hydrochloride                  | LOPAC   | 16       | F   | 4      | 0.482     | -0.182          |
| 4949 | XCT790                                                         | LOPAC   | 16       | G   | 4      | -0.482    | 0.748           |
| 4950 | 3-Tropanylindole-3-carboxylate methiodide                      | LOPAC   | 16       | H   | 4      | -1.094    | 0.991           |
| 4951 | Telenzepine dihydrochloride                                    | LOPAC   | 16       | A   | 5      | -0.271    | 1.295           |
| 4952 | Thiopiperamide maleate                                         | LOPAC   | 16       | B   | 5      | -0.056    | 0.311           |
| 4953 | (±)-Thalidomide                                                | LOPAC   | 16       | C   | 5      | 0.357     | -0.234          |
| 4954 | A-68930 hydrochloride                                          | LOPAC   | 16       | D   | 5      | -0.081    | 0.566           |
| 4955 | SHPP-33                                                        | LOPAC   | 16       | E   | 5      | 0.121     | -0.319          |
| 4956 | Tyrphostin A9                                                  | LOPAC   | 16       | F   | 5      | 0.489     | -1.248          |
| 4957 | TPMPA                                                          | LOPAC   | 16       | G   | 5      | -0.49     | 0.259           |
| 4958 | U-75302                                                        | LOPAC   | 16       | H   | 5      | -0.878    | 1.159           |
| 4959 | Uridine 5'-diphosphate sodium                                  | LOPAC   | 16       | A   | 6      | -0.879    | 0.323           |
| 4960 | U-74389G maleate                                               | LOPAC   | 16       | B   | 6      | -0.342    | 0.104           |
| 4961 | CCT007093                                                      | LOPAC   | 16       | C   | 6      | 0.474     | -0.589          |
| 4962 | U-73122                                                        | LOPAC   | 16       | D   | 6      | -0.047    | -0.54           |
| 4963 | SKF 95282 dimaleate                                            | LOPAC   | 16       | E   | 6      | -0.121    | 0.315           |
| 4964 | 4-Imidazoleacrylic acid                                        | LOPAC   | 16       | F   | 6      | 0.316     | -0.018          |
| 4965 | Urapidil hydrochloride                                         | LOPAC   | 16       | G   | 6      | -0.49     | 0.244           |
| 4966 | Urapidil, 5-Methyl-                                            | LOPAC   | 16       | H   | 6      | -0.812    | 0.927           |
| 4967 | U-69593                                                        | LOPAC   | 16       | A   | 7      | -0.853    | -0.078          |
| 4968 | UR 14,304                                                      | LOPAC   | 16       | B   | 7      | -0.68     | -0.327          |
| 4969 | U-62066                                                        | LOPAC   | 16       | C   | 7      | -0.288    | 0.056           |
| 4970 | S(-)-UH-301 hydrochloride                                      | LOPAC   | 16       | D   | 7      | 0.581     | -0.856          |
| 4971 | (+)-Norfenfluramine hydrochloride                              | LOPAC   | 16       | E   | 7      | -0.065    | -0.363          |
| 4972 | CGP 57380                                                      | LOPAC   | 16       | F   | 7      | -0.087    | 0.183           |
| 4973 | (-)-trans-(1S,2S)-U-50488 hydrochloride                        | LOPAC   | 16       | G   | 7      | -0.113    | 0.337           |
| 4974 | U-101958 maleate                                               | LOPAC   | 16       | H   | 7      | -0.807    | 0.777           |
| 4975 | U-99194A maleate                                               | LOPAC   | 16       | A   | 8      | -0.423    | 0.56            |
| 4976 | U0126                                                          | LOPAC   | 16       | B   | 8      | 0.394     | -1.637          |
| 4977 | Vinblastine sulfate salt                                       | LOPAC   | 16       | C   | 8      | 1.627     | -2.057          |
| 4978 | (±)-Verapamil hydrochloride                                    | LOPAC   | 16       | D   | 8      | 0.854     | 0.108           |
| 4979 | A-134974 dihydrochloride hydrate                               | LOPAC   | 16       | E   | 8      | -0.008    | 2.254           |
| 4980 | Vinpocetine                                                    | LOPAC   | 16       | F   | 8      | 0.32      | 0.729           |
| 4981 | Vancomycin hydrochloride from Streptomyces orientalis          | LOPAC   | 16       | G   | 8      | -0.4      | -0.55           |
| 4982 | (±)-gamma-Vinyl GABA                                           | LOPAC   | 16       | H   | 8      | -0.9      | 1.11            |
| 4983 | Vincristine sulfate                                            | LOPAC   | 16       | A   | 9      | 0.581     | -0.803          |
| 4984 | AMG 9810                                                       | LOPAC   | 16       | B   | 9      | -0.47     | -0.287          |
| 4985 | (±)-Vesamicol hydrochloride                                    | LOPAC   | 16       | C   | 9      | 0.029     | -0.234          |
| 4986 | L-Mimosine from Koa hoale seeds                                | LOPAC   | 16       | D   | 9      | 0.215     | -0.152          |
| 4987 | Wortmannin from Penicillium funiculosum                        | LOPAC   | 16       | E   | 9      | 1.215     | -3.997          |
| 4988 | ICI 63,137                                                     | LOPAC   | 16       | F   | 9      | -0.471    | 0.229           |
| 4989 | LY2183240                                                      | LOPAC   | 16       | G   | 9      | 0.496     | -1.415          |

SUPPLEMENTARY DATA

|      | Name                                                          | Library | Plate No | Row | Column | ROS score | viability score |
|------|---------------------------------------------------------------|---------|----------|-----|--------|-----------|-----------------|
| 4900 | (R)-(+)-WIN 55,212-2 mesylate                                 | LOFAC   | 16       | H   | 9      | -1.384    | 1.183           |
| 4901 | WIN 62,577                                                    | LOFAC   | 16       | A   | 10     | 0.427     | -0.124          |
| 4902 | Ara-G hydrate                                                 | LOFAC   | 16       | B   | 10     | -0.340    | -1.028          |
| 4903 | WAY-100635 maleate                                            | LOFAC   | 16       | C   | 10     | 0.3       | -0.338          |
| 4904 | AC-55649                                                      | LOFAC   | 16       | D   | 10     | 0.355     | -0.073          |
| 4905 | Xylazine hydrochloride                                        | LOFAC   | 16       | E   | 10     | 0.085     | -0.52           |
| 4906 | SCH 58261                                                     | LOFAC   | 16       | F   | 10     | -0.246    | 0.758           |
| 4907 | Xylometazoline hydrochloride                                  | LOFAC   | 16       | G   | 10     | -0.94     | 0.216           |
| 4908 | Xanthine amine congener                                       | LOFAC   | 16       | H   | 10     | -1.140    | 0.86            |
| 4909 | Yohimbine hydrochloride                                       | LOFAC   | 16       | A   | 11     | -0.306    | 0.273           |
| 5000 | YS-035 hydrochloride                                          | LOFAC   | 16       | B   | 11     | 0.495     | 0.307           |
| 5001 | YC-1                                                          | LOFAC   | 16       | C   | 11     | 0.311     | 0.558           |
| 5002 | Zaprinast                                                     | LOFAC   | 16       | D   | 11     | 0.623     | 0.284           |
| 5003 | Zonisamide sodium                                             | LOFAC   | 16       | E   | 11     | 0.086     | 0.377           |
| 5004 | Caroverine hydrochloride                                      | LOFAC   | 16       | F   | 11     | -0.436    | 0.482           |
| 5005 | Olprimone hydrochloride                                       | LOFAC   | 16       | G   | 11     | -0.975    | 0.438           |
| 5006 | Zimelidine dihydrochloride                                    | LOFAC   | 16       | H   | 11     | -1.488    | 1.073           |
| 5007 | (-)-Bicuculline methobromide                                  | Toosis  | 1        | A   | 2      | -0.09     | -0.696          |
| 5008 | DNQX                                                          | Toosis  | 1        | B   | 2      | 0.288     | -0.242          |
| 5009 | 2-Hydroxysaclofen                                             | Toosis  | 1        | C   | 2      | 0.978     | 0.84            |
| 5010 | Muscimol                                                      | Toosis  | 1        | D   | 2      | 0.791     | -0.195          |
| 5011 | 4-Acetyl-1,1-dimethylpiperazinium iodide                      | Toosis  | 1        | E   | 2      | 0.026     | 0.255           |
| 5012 | Y-28130 hydrochloride                                         | Toosis  | 1        | F   | 2      | 0.055     | 0.434           |
| 5013 | H-8 dihydrochloride                                           | Toosis  | 1        | G   | 2      | 0.178     | 1.091           |
| 5014 | UK 14,304                                                     | Toosis  | 1        | H   | 2      | -0.216    | 1.37            |
| 5015 | NMDA                                                          | Toosis  | 1        | A   | 3      | -0.787    | -0.180          |
| 5016 | CNQX                                                          | Toosis  | 1        | B   | 3      | -0.38     | -0.318          |
| 5017 | Saclofen                                                      | Toosis  | 1        | C   | 3      | -0.11     | 0.62            |
| 5018 | (RS)-4-Carboxy-3-hydroxyphenylglycine                         | Toosis  | 1        | D   | 3      | 0.313     | -0.481          |
| 5019 | N-Acetyltryptamine                                            | Toosis  | 1        | E   | 3      | 0.484     | -0.298          |
| 5020 | Arecaidine but-2-ynyl ester tosylate                          | Toosis  | 1        | F   | 3      | -0.162    | -0.83           |
| 5021 | b-CCB                                                         | Toosis  | 1        | G   | 3      | -0.138    | 2.535           |
| 5022 | L-693,403 maleate                                             | Toosis  | 1        | H   | 3      | -0.383    | 0.915           |
| 5023 | (+)-Bicuculline                                               | Toosis  | 1        | A   | 4      | -0.316    | -1.581          |
| 5024 | Homoquinolinic acid                                           | Toosis  | 1        | B   | 4      | 0.126     | -0.842          |
| 5025 | (R)-AMPA                                                      | Toosis  | 1        | C   | 4      | -0.161    | -0.810          |
| 5026 | (RS)-Tetrazol-5-ylglycine                                     | Toosis  | 1        | D   | 4      | 0.753     | -1.443          |
| 5027 | (±)-1,1,2-Diphenylethylpiperidine maleate                     | Toosis  | 1        | E   | 4      | 0.741     | -1.35           |
| 5028 | Arecaidine propargyl ester tosylate                           | Toosis  | 1        | F   | 4      | 0.189     | -1.926          |
| 5029 | MDL 73005EF hydrochloride                                     | Toosis  | 1        | G   | 4      | -0.764    | -0.28           |
| 5030 | Bromocriptine mesylate                                        | Toosis  | 1        | H   | 4      | -1.282    | 1.405           |
| 5031 | (-)-Bicuculline methochloride                                 | Toosis  | 1        | A   | 5      | -0.465    | -0.513          |
| 5032 | L-Cysteinesulfonic acid                                       | Toosis  | 1        | B   | 5      | 0.253     | 0.95            |
| 5033 | (S)-AMPA                                                      | Toosis  | 1        | C   | 5      | 0.662     | -0.07           |
| 5034 | (S)-4-Carboxy-3-hydroxyphenylglycine                          | Toosis  | 1        | D   | 5      | 0.869     | 0.225           |
| 5035 | W-13 hydrochloride                                            | Toosis  | 1        | E   | 5      | 1.172     | -0.019          |
| 5036 | SG 209                                                        | Toosis  | 1        | F   | 5      | 1.405     | 0.808           |
| 5037 | MDL 72832 hydrochloride                                       | Toosis  | 1        | G   | 5      | -0.603    | 0.755           |
| 5038 | SC-10                                                         | Toosis  | 1        | H   | 5      | -0.935    | 0.344           |
| 5039 | S-Sulfo-L-cysteine sodium salt                                | Toosis  | 1        | A   | 6      | -0.288    | -0.141          |
| 5040 | Kainic acid                                                   | Toosis  | 1        | B   | 6      | 1.115     | 0.787           |
| 5041 | Domoic acid                                                   | Toosis  | 1        | C   | 6      | 1.53      | -0.333          |
| 5042 | (R)-3-Carboxy-4-hydroxyphenylglycine                          | Toosis  | 1        | D   | 6      | 1.568     | -0.238          |
| 5043 | A-3 hydrochloride                                             | Toosis  | 1        | E   | 6      | 1.645     | -0.273          |
| 5044 | 3-Methyl-GABA (2:1 salt with naphthalene-1,5-disulfonic acid) | Toosis  | 1        | F   | 6      | 0.858     | 0.845           |
| 5045 | AG 490                                                        | Toosis  | 1        | G   | 6      | 0.390     | 1.041           |
| 5046 | ML 9 hydrochloride                                            | Toosis  | 1        | H   | 6      | -1.566    | 0.421           |
| 5047 | (RS)-AMPA                                                     | Toosis  | 1        | A   | 7      | 0.348     | -0.555          |
| 5048 | Kynurenic acid                                                | Toosis  | 1        | B   | 7      | 0.856     | -1.148          |
| 5049 | cis-ACBD                                                      | Toosis  | 1        | C   | 7      | 0.29      | -0.756          |
| 5050 | (S)-3-Carboxy-4-hydroxyphenylglycine                          | Toosis  | 1        | D   | 7      | 0.506     | -0.874          |
| 5051 | W-5 hydrochloride                                             | Toosis  | 1        | E   | 7      | 0.424     | -0.657          |
| 5052 | (RS)-Atenolol                                                 | Toosis  | 1        | F   | 7      | 1.077     | -0.693          |
| 5053 | Ro 20-1724                                                    | Toosis  | 1        | G   | 7      | -0.121    | 0.393           |
| 5054 | MY-5445                                                       | Toosis  | 1        | H   | 7      | -1.126    | 4.064           |
| 5055 | ZAPA sulfate                                                  | Toosis  | 1        | A   | 8      | -0.719    | 0.027           |
| 5056 | Quinolinic acid                                               | Toosis  | 1        | B   | 8      | 0.55      | -0.102          |
| 5057 | (R)-(+)-HA-966                                                | Toosis  | 1        | C   | 8      | 1.207     | -0.368          |
| 5058 | (RS)-3,5-DHPG                                                 | Toosis  | 1        | D   | 8      | 0.962     | 0.8             |
| 5059 | W-7 hydrochloride                                             | Toosis  | 1        | E   | 8      | 1.456     | 0.48            |
| 5060 | Ambenonium dichloride                                         | Toosis  | 1        | F   | 8      | 0.856     | 1.553           |
| 5061 | YS-035 hydrochloride                                          | Toosis  | 1        | G   | 8      | 0.425     | 1.472           |
| 5062 | SC-9                                                          | Toosis  | 1        | H   | 8      | -0.283    | 1.83            |
| 5063 | cis-ACPD                                                      | Toosis  | 1        | A   | 9      | -0.126    | -0.073          |
| 5064 | Guvacine hydrochloride                                        | Toosis  | 1        | B   | 9      | 1.337     | -0.835          |
| 5065 | (S)-(-)-HA-966                                                | Toosis  | 1        | C   | 9      | 0.276     | -0.951          |
| 5066 | nor-Binaltorphimine dihydrochloride                           | Toosis  | 1        | D   | 9      | 0.332     | -0.549          |
| 5067 | W-9 hydrochloride                                             | Toosis  | 1        | E   | 9      | 0.181     | -0.072          |
| 5068 | Spaglumic acid                                                | Toosis  | 1        | F   | 9      | -0.472    | 1.286           |
| 5069 | GBR 13069 dihydrochloride                                     | Toosis  | 1        | G   | 9      | -0.09     | 1.161           |
| 5070 | Cimaterol                                                     | Toosis  | 1        | H   | 9      | -0.313    | 1.008           |
| 5071 | SQ 22536                                                      | Toosis  | 1        | A   | 10     | -0.279    | -1.014          |
| 5072 | Isoguvacine hydrochloride                                     | Toosis  | 1        | B   | 10     | 0.4       | -1.286          |
| 5073 | Ibotenic acid                                                 | Toosis  | 1        | C   | 10     | 0.811     | -1.036          |
| 5074 | 2-BFI hydrochloride                                           | Toosis  | 1        | D   | 10     | -0.018    | -1.066          |
| 5075 | NBQX                                                          | Toosis  | 1        | E   | 10     | 0.395     | -0.828          |
| 5076 | S(-)-Atenolol                                                 | Toosis  | 1        | F   | 10     | 0.358     | -0.441          |
| 5077 | GBR 12909 dihydrochloride                                     | Toosis  | 1        | G   | 10     | -0.491    | 0.086           |
| 5078 | Etazolate hydrochloride                                       | Toosis  | 1        | H   | 10     | -1.56     | 0.703           |
| 5079 | L-Quisqualic acid                                             | Toosis  | 1        | A   | 11     | 0.129     | -0.141          |
| 5080 | 7-Chlorokynurenic acid                                        | Toosis  | 1        | B   | 11     | -0.613    | -0.8            |
| 5081 | 5,7-Dichlorokynurenic acid                                    | Toosis  | 1        | C   | 11     | 0.344     | -1.534          |
| 5082 | 1-Acetyl-4-methylpiperazine hydrochloride                     | Toosis  | 1        | D   | 11     | 0.791     | -0.902          |
| 5083 | A-7 hydrochloride                                             | Toosis  | 1        | E   | 11     | 0.306     | -0.722          |
| 5084 | N-Acetylglycyl-D-glutamic acid                                | Toosis  | 1        | F   | 11     | 0.084     | -0.147          |
| 5085 | Benzoguanonium dibromide                                      | Toosis  | 1        | G   | 11     | -0.428    | -0.197          |
| 5086 | DPCPX                                                         | Toosis  | 1        | H   | 11     | -1.273    | -0.291          |
| 5087 | m-Chlorophenylbiguanide hydrochloride                         | Toosis  | 2        | A   | 2      | -0.637    | 0.987           |
| 5088 | Clomipramine hydrochloride                                    | Toosis  | 2        | B   | 2      | -0.677    | -0.206          |
| 5089 | Flurofamide                                                   | Toosis  | 2        | C   | 2      | -0.676    | -0.01           |
| 5090 | AG 99                                                         | Toosis  | 2        | D   | 2      | 0.402     | 0.963           |
| 5091 | GBR 12935 dihydrochloride                                     | Toosis  | 2        | E   | 2      | 0.413     | 0.818           |
| 5092 | H-7 dihydrochloride                                           | Toosis  | 2        | F   | 2      | -0.293    | 2.129           |
| 5093 | 2-Methyl-5-hydroxytryptamine hydrochloride                    | Toosis  | 2        | G   | 2      | 0.198     | 2.150           |
| 5094 | Methiohepin maleate                                           | Toosis  | 2        | H   | 2      | -0.573    | 0.146           |

SUPPLEMENTARY DATA

|      | Name                                                                                                  | Library | Plate No | Row | Column | ROS score | viability score |
|------|-------------------------------------------------------------------------------------------------------|---------|----------|-----|--------|-----------|-----------------|
| 5095 | 4-Chlorophenylguanidine hydrochloride                                                                 | Toosis  | 2        | A   | 3      | 0.389     | 0.107           |
| 5096 | 5-Carboxamidotryptamine maleate                                                                       | Toosis  | 2        | B   | 3      | 0.491     | -1.022          |
| 5097 | Malonoben                                                                                             | Toosis  | 2        | C   | 3      | 1.038     | -3.543          |
| 5098 | U-5494A hydrochloride                                                                                 | Toosis  | 2        | D   | 3      | 0.537     | -1.138          |
| 5099 | Dobutamine hydrochloride                                                                              | Toosis  | 2        | E   | 3      | 0.597     | -0.171          |
| 5100 | C-1                                                                                                   | Toosis  | 2        | F   | 3      | 0.489     | 0.147           |
| 5101 | N-Methylguipazine dimaleate                                                                           | Toosis  | 2        | G   | 3      | -0.734    | 0.874           |
| 5102 | Minoxidil                                                                                             | Toosis  | 2        | H   | 3      | -0.512    | 1.118           |
| 5103 | 5-Chloromelatonin                                                                                     | Toosis  | 2        | A   | 4      | 0.289     | 0.528           |
| 5104 | Cinanserin hydrochloride                                                                              | Toosis  | 2        | B   | 4      | 0.84      | -0.179          |
| 5105 | Dilazep dihydrochloride                                                                               | Toosis  | 2        | C   | 4      | 0.621     | 0.102           |
| 5106 | AG 213                                                                                                | Toosis  | 2        | D   | 4      | -0.094    | -0.518          |
| 5107 | EBPC                                                                                                  | Toosis  | 2        | E   | 4      | 0.414     | 0.152           |
| 5108 | IPAG                                                                                                  | Toosis  | 2        | F   | 4      | 0.631     | -0.975          |
| 5109 | Metaphit                                                                                              | Toosis  | 2        | G   | 4      | 0.157     | 0.667           |
| 5110 | L-(-)-α-Methyldopa                                                                                    | Toosis  | 2        | H   | 4      | -0.117    | -0.211          |
| 5111 | Clozapine                                                                                             | Toosis  | 2        | A   | 5      | -0.067    | 0.448           |
| 5112 | (E)-Capsaicin                                                                                         | Toosis  | 2        | B   | 5      | -0.061    | -0.007          |
| 5113 | 4-DAMP                                                                                                | Toosis  | 2        | C   | 5      | 0.493     | 0.227           |
| 5114 | Diphenyleiiodonium chloride                                                                           | Toosis  | 2        | D   | 5      | 2.44      | -4.722          |
| 5115 | Flunarizine dihydrochloride                                                                           | Toosis  | 2        | E   | 5      | 0.577     | 0.135           |
| 5116 | Ifenprodil                                                                                            | Toosis  | 2        | F   | 5      | 0.468     | 0.23            |
| 5117 | (R)-(-)-α-Methylhistamine dihydrobromide                                                              | Toosis  | 2        | G   | 5      | 0.284     | 0.65            |
| 5118 | 5-Methylfurmethiodide                                                                                 | Toosis  | 2        | H   | 5      | -0.665    | -0.811          |
| 5119 | Calpeptin                                                                                             | Toosis  | 2        | A   | 6      | -0.116    | 0.395           |
| 5120 | (Z)-Capsaicin                                                                                         | Toosis  | 2        | B   | 6      | 0.582     | 0.192           |
| 5121 | OR-486                                                                                                | Toosis  | 2        | C   | 6      | 0.644     | -0.284          |
| 5122 | Dimaprit dihydrochloride                                                                              | Toosis  | 2        | D   | 6      | 0.747     | 0.411           |
| 5123 | 4F 4PP oxalate                                                                                        | Toosis  | 2        | E   | 6      | 0.739     | -0.345          |
| 5124 | Methylergometrine maleate                                                                             | Toosis  | 2        | F   | 6      | 0.337     | 0.33            |
| 5125 | PCA 4248                                                                                              | Toosis  | 2        | G   | 6      | 0.735     | 2.109           |
| 5126 | PRE-084 hydrochloride                                                                                 | Toosis  | 2        | H   | 6      | -0.071    | 0.184           |
| 5127 | CCCP                                                                                                  | Toosis  | 2        | A   | 7      | 0.271     | 0.521           |
| 5128 | Capsazepine                                                                                           | Toosis  | 2        | B   | 7      | 0.063     | 0.69            |
| 5129 | Alrestatin                                                                                            | Toosis  | 2        | C   | 7      | 0.807     | 0.145           |
| 5130 | Dantrolene, sodium salt                                                                               | Toosis  | 2        | D   | 7      | 0.774     | 0.523           |
| 5131 | 8-Hydroxy-DPAT hydrobromide                                                                           | Toosis  | 2        | E   | 7      | 0.839     | 0.249           |
| 5132 | MMPX                                                                                                  | Toosis  | 2        | F   | 7      | 0.762     | 0.017           |
| 5133 | (S)-(+)-α-Methylhistamine dihydrobromide                                                              | Toosis  | 2        | G   | 7      | -0.02     | 0.301           |
| 5134 | Metergoline phenylmethyl ester                                                                        | Toosis  | 2        | H   | 7      | -2.102    | -0.225          |
| 5135 | FCCP                                                                                                  | Toosis  | 2        | A   | 8      | 0.301     | -0.42           |
| 5136 | Nitrocaramiphen hydrochloride                                                                         | Toosis  | 2        | B   | 8      | 0.854     | 0.967           |
| 5137 | 1,3-Dipropyl-8-phenylxanthine                                                                         | Toosis  | 2        | C   | 8      | 1.066     | -0.605          |
| 5138 | Doxepin hydrochloride                                                                                 | Toosis  | 2        | D   | 8      | -0.191    | 0.322           |
| 5139 | HEAT hydrochloride                                                                                    | Toosis  | 2        | E   | 8      | 0.439     | 0.049           |
| 5140 | NAN-190 hydrobromide                                                                                  | Toosis  | 2        | F   | 8      | 0.894     | -0.443          |
| 5141 | Na-Methylhistamine dihydrochloride                                                                    | Toosis  | 2        | G   | 8      | 0.031     | -0.536          |
| 5142 | NPPB                                                                                                  | Toosis  | 2        | H   | 8      | -0.636    | 0.298           |
| 5143 | Carbetapentane citrate                                                                                | Toosis  | 2        | A   | 9      | 0.037     | 0.682           |
| 5144 | (+)-U-50488 hydrochloride                                                                             | Toosis  | 2        | B   | 9      | 0.31      | -0.497          |
| 5145 | AG 18                                                                                                 | Toosis  | 2        | C   | 9      | 0.604     | -0.315          |
| 5146 | BD 1008 dihydrobromide                                                                                | Toosis  | 2        | D   | 9      | 0.967     | 1.079           |
| 5147 | MR 16728 hydrochloride                                                                                | Toosis  | 2        | E   | 9      | 0.877     | -0.871          |
| 5148 | FG 7142                                                                                               | Toosis  | 2        | F   | 9      | 0.669     | -0.882          |
| 5149 | Methyl 2,5-dihydroxycinnamate                                                                         | Toosis  | 2        | G   | 9      | -0.098    | -0.863          |
| 5150 | Naftopidil hydrochloride                                                                              | Toosis  | 2        | H   | 9      | -0.785    | -0.069          |
| 5151 | (S)-(-)-Carbidopa                                                                                     | Toosis  | 2        | A   | 10     | -0.128    | 0.872           |
| 5152 | Dihydroergocristine mesylate                                                                          | Toosis  | 2        | B   | 10     | 0.769     | -0.713          |
| 5153 | (±)-U-50488 hydrochloride                                                                             | Toosis  | 2        | C   | 10     | 0.408     | -1.273          |
| 5154 | SKF 91488 dihydrochloride                                                                             | Toosis  | 2        | D   | 10     | 0.267     | 0.309           |
| 5155 | trans-4-Hydroxyrotonic acid                                                                           | Toosis  | 2        | E   | 10     | 0.414     | -0.829          |
| 5156 | BP 554 maleate                                                                                        | Toosis  | 2        | F   | 10     | 0.391     | -0.54           |
| 5157 | Tyrphostin B44, (+) enantiomer                                                                        | Toosis  | 2        | G   | 10     | 0.039     | -1.476          |
| 5158 | Naloxone hydrochloride                                                                                | Toosis  | 2        | H   | 10     | -1.445    | -1.298          |
| 5159 | Chlomezanone                                                                                          | Toosis  | 2        | A   | 11     | 0.324     | 1.712           |
| 5160 | Dihydroergotamine mesylate                                                                            | Toosis  | 2        | B   | 11     | 0.369     | -0.569          |
| 5161 | (-)-U-50488 hydrochloride                                                                             | Toosis  | 2        | C   | 11     | 0.76      | 0.012           |
| 5162 | GBR 12783 dihydrochloride                                                                             | Toosis  | 2        | D   | 11     | 0.377     | 0.248           |
| 5163 | Fasudil hydrochloride                                                                                 | Toosis  | 2        | E   | 11     | 0.503     | 0.352           |
| 5164 | α-Methyl-5-hydroxytryptamine maleate                                                                  | Toosis  | 2        | F   | 11     | 0.661     | 0.589           |
| 5165 | 3-[2-[4-(2-Methoxyphenyl)piperazin-1-yl] ethyl]pyrimido[5,4-b] indole-2,4-dione                       | Toosis  | 2        | G   | 11     | -0.503    | 0.822           |
| 5166 | Nimodipine                                                                                            | Toosis  | 2        | H   | 11     | -2.047    | -0.367          |
| 5167 | Nitrendipine                                                                                          | Toosis  | 3        | A   | 2      | -0.607    | -0.032          |
| 5168 | Physostigmine hemisulfate                                                                             | Toosis  | 3        | B   | 2      | -0.532    | 0.027           |
| 5169 | Troparyl-3,5-dimethylbenzoate                                                                         | Toosis  | 3        | C   | 2      | -0.15     | -0.331          |
| 5170 | Mepyramine maleate                                                                                    | Toosis  | 3        | D   | 2      | 0.309     | -0.063          |
| 5171 | (+)-AJ 76 hydrochloride                                                                               | Toosis  | 3        | E   | 2      | -0.417    | -0.412          |
| 5172 | Retinoic acid                                                                                         | Toosis  | 3        | F   | 2      | 0.276     | -0.863          |
| 5173 | Pirlindole mesylate                                                                                   | Toosis  | 3        | G   | 2      | -0.971    | 0.145           |
| 5174 | 2-Iodomelatonin                                                                                       | Toosis  | 3        | H   | 2      | -1.436    | 1.429           |
| 5175 | 7-Nitroindazole                                                                                       | Toosis  | 3        | A   | 3      | -0.177    | 0.388           |
| 5176 | Prazosin hydrochloride                                                                                | Toosis  | 3        | B   | 3      | 0.393     | -0.563          |
| 5177 | Thiopamide maleate                                                                                    | Toosis  | 3        | C   | 3      | 0.575     | -0.424          |
| 5178 | 2-[[4-(2-Methoxyphenyl)piperazin-1-yl] methyl]-6-methyl-2,3-dihydroimidazo[1,2-c]quinazolin-5(6H)-one | Toosis  | 3        | D   | 3      | 0.837     | -1.117          |
| 5179 | 2-Phenylmelatonin                                                                                     | Toosis  | 3        | E   | 3      | 0.766     | -0.332          |
| 5180 | BRL 52537 hydrochloride                                                                               | Toosis  | 3        | F   | 3      | 0.957     | -0.928          |
| 5181 | BU 224 hydrochloride                                                                                  | Toosis  | 3        | G   | 3      | 0.168     | 0.303           |
| 5182 | Naltrindole hydrochloride                                                                             | Toosis  | 3        | H   | 3      | -0.457    | 0.033           |
| 5183 | Nicoergoline                                                                                          | Toosis  | 3        | A   | 4      | 0.033     | 0.36            |
| 5184 | Propranolol hydrochloride                                                                             | Toosis  | 3        | B   | 4      | 0.556     | 0.511           |
| 5185 | 2-(1-Thienyl)ethyl 3,4-dihydroxybenzylidenecyanoacetate                                               | Toosis  | 3        | C   | 4      | 0.991     | 0.562           |
| 5186 | trans-Tripolidine hydrochloride                                                                       | Toosis  | 3        | D   | 4      | 0.54      | 0.647           |
| 5187 | L-690,330                                                                                             | Toosis  | 3        | E   | 4      | 0.563     | 0.757           |
| 5188 | 3'-Fluorobenzylspiperone maleate                                                                      | Toosis  | 3        | F   | 4      | 0.085     | -1.703          |
| 5189 | BU 239 hydrochloride                                                                                  | Toosis  | 3        | G   | 4      | 0.184     | 1.554           |
| 5190 | GF 109203X                                                                                            | Toosis  | 3        | H   | 4      | -0.419    | 1.391           |
| 5191 | OBAA                                                                                                  | Toosis  | 3        | A   | 5      | 0.024     | 0.086           |
| 5192 | 2-[[4-(Phenylpiperazin-1-yl)methyl]-2,3-dihydroimidazo[1,2-c]quinazolin-5(6H)-one                     | Toosis  | 3        | B   | 5      | 0.328     | -0.176          |
| 5193 | HTMT dimaleate                                                                                        | Toosis  | 3        | C   | 5      | 0.568     | 0.501           |
| 5194 | L-NAME                                                                                                | Toosis  | 3        | D   | 5      | 0.673     | -0.25           |
| 5195 | Diltiazem hydrochloride                                                                               | Toosis  | 3        | E   | 5      | 0.257     | 0.115           |
| 5196 | BTCP maleate                                                                                          | Toosis  | 3        | F   | 5      | 0.524     | -0.393          |
| 5197 | Pyrrolidinedithiocarbamate ammonium                                                                   | Toosis  | 3        | G   | 5      | -0.487    | 2.366           |
| 5198 | L-689,560                                                                                             | Toosis  | 3        | H   | 5      | -0.905    | 1.827           |
| 5199 | (±)-Palmitoylecylamine chloride                                                                       | Toosis  | 3        | A   | 6      | 0.579     | 0.371           |

SUPPLEMENTARY DATA

|      | Name                                                                            | Library | Plate No | Row | Column | ROS score | viability score |
|------|---------------------------------------------------------------------------------|---------|----------|-----|--------|-----------|-----------------|
| 5200 | Quipazine dimaleate                                                             | Toots   | 3        | B   | 8      | 0.887     | -0.183          |
| 5201 | (S)-Timolol maleate                                                             | Toots   | 3        | C   | 8      | 0.71      | -0.701          |
| 5202 | 3-(4-Allylpiperazin-1-yl)-2-quinolinecarbonitrile maleate                       | Toots   | 3        | D   | 8      | 0.602     | 0.325           |
| 5203 | Galanthamine hydrobromide                                                       | Toots   | 3        | E   | 8      | 0.87      | -0.02           |
| 5204 | Anipriline hydrochloride                                                        | Toots   | 3        | F   | 8      | -0.072    | -0.535          |
| 5205 | RS 23597-190 hydrochloride                                                      | Toots   | 3        | G   | 8      | 0.188     | 0.591           |
| 5206 | DPPE fumarate                                                                   | Toots   | 3        | H   | 8      | -0.54     | 0.087           |
| 5207 | Parthenolide                                                                    | Toots   | 3        | A   | 7      | 0.077     | -0.3            |
| 5208 | Rosmarinic acid                                                                 | Toots   | 3        | B   | 7      | 0.386     | -1.078          |
| 5209 | Thalidomide                                                                     | Toots   | 3        | C   | 7      | 0.468     | -1.597          |
| 5210 | Amthamine dihydrobromide                                                        | Toots   | 3        | D   | 7      | 0.812     | -0.793          |
| 5211 | Danazol                                                                         | Toots   | 3        | E   | 7      | 0.081     | -0.338          |
| 5212 | L-701,252                                                                       | Toots   | 3        | F   | 7      | -0.162    | 0.451           |
| 5213 | Imetel dihydrobromide                                                           | Toots   | 3        | G   | 7      | 0.059     | 0.851           |
| 5214 | Ceramide                                                                        | Toots   | 3        | H   | 7      | -0.775    | 0.203           |
| 5215 | AG 556                                                                          | Toots   | 3        | A   | 8      | -0.524    | 0.214           |
| 5216 | Spiroaxtrine                                                                    | Toots   | 3        | B   | 8      | 0.063     | 1.018           |
| 5217 | (±)-Vesamicol hydrochloride                                                     | Toots   | 3        | C   | 8      | 1.069     | 0.102           |
| 5218 | PK 11195                                                                        | Toots   | 3        | D   | 8      | 1.088     | -1.003          |
| 5219 | Clonidine hydrochloride                                                         | Toots   | 3        | E   | 8      | 0.568     | 0.525           |
| 5220 | 7-Hydroxy-DPAT hydrobromide                                                     | Toots   | 3        | F   | 8      | 0.371     | 2.026           |
| 5221 | 4-Phenyl-1,2,3,4-tetrahydroisoquinoline hydrochloride                           | Toots   | 3        | G   | 8      | -0.265    | 1.672           |
| 5222 | L1BP                                                                            | Toots   | 3        | H   | 8      | -0.521    | 1.018           |
| 5223 | AG 555                                                                          | Toots   | 3        | A   | 9      | -0.065    | 0.783           |
| 5224 | Salbutamol hemisulfate                                                          | Toots   | 3        | B   | 9      | 0.081     | -1.545          |
| 5225 | Verapamil hydrochloride                                                         | Toots   | 3        | C   | 9      | 0.31      | -1.524          |
| 5226 | AH 6809                                                                         | Toots   | 3        | D   | 9      | 0.472     | -0.148          |
| 5227 | Dipyridamole                                                                    | Toots   | 3        | E   | 9      | -0.137    | 0.381           |
| 5228 | Cyclothiazide                                                                   | Toots   | 3        | F   | 9      | 0.197     | 0.784           |
| 5229 | Sulfisoxazole                                                                   | Toots   | 3        | G   | 9      | 0.608     | 2.525           |
| 5230 | PG-9 maleate                                                                    | Toots   | 3        | H   | 9      | -0.662    | 0.155           |
| 5231 | AG 494                                                                          | Toots   | 3        | A   | 10     | -0.38     | 0.137           |
| 5232 | Salsolinol-1-carboxylic acid                                                    | Toots   | 3        | B   | 10     | 0.445     | -0.35           |
| 5233 | FGIN-1-27                                                                       | Toots   | 3        | C   | 10     | 1.127     | -2.307          |
| 5234 | NPC 15199                                                                       | Toots   | 3        | D   | 10     | 0.885     | -1.185          |
| 5235 | Ipratropium bromide                                                             | Toots   | 3        | E   | 10     | -0.309    | 0.857           |
| 5236 | 7-Hydroxy-PIPAT maleate                                                         | Toots   | 3        | F   | 10     | 0.559     | -0.026          |
| 5237 | 3-Bromo-7-nitroindazole                                                         | Toots   | 3        | G   | 10     | 0.105     | 0.891           |
| 5238 | SM-21 maleate                                                                   | Toots   | 3        | H   | 10     | -0.421    | -1.368          |
| 5239 | 4-PPBP maleate                                                                  | Toots   | 3        | A   | 11     | -0.062    | -0.195          |
| 5240 | MDL 72222                                                                       | Toots   | 3        | B   | 11     | -0.146    | -0.888          |
| 5241 | FGIN-1-43                                                                       | Toots   | 3        | C   | 11     | 0.739     | -1.856          |
| 5242 | Naltrexone hydrochloride                                                        | Toots   | 3        | D   | 11     | -0.023    | -0.89           |
| 5243 | Pilocarpine hydrochloride                                                       | Toots   | 3        | E   | 11     | -0.04     | -1.723          |
| 5244 | Tetrandole mesylate                                                             | Toots   | 3        | F   | 11     | -0.542    | -0.382          |
| 5245 | 2-(1-(4-Piperonyl)piperazinyl)benzothiazole                                     | Toots   | 3        | G   | 11     | -0.295    | 1.503           |
| 5246 | Clobenpropit dihydrobromide                                                     | Toots   | 3        | H   | 11     | -0.728    | -1.485          |
| 5247 | N-Benzylnaltrexone hydrochloride                                                | Toots   | 4        | A   | 2      | -0.501    | 0.585           |
| 5248 | Memantine hydrochloride                                                         | Toots   | 4        | B   | 2      | -0.085    | 0.141           |
| 5249 | MCI-186                                                                         | Toots   | 4        | C   | 2      | 0.353     | 2.322           |
| 5250 | THIP hydrochloride                                                              | Toots   | 4        | D   | 2      | 0.651     | 1.364           |
| 5251 | ICI 162 846                                                                     | Toots   | 4        | E   | 2      | 0.22      | 1.394           |
| 5252 | MTPG                                                                            | Toots   | 4        | F   | 2      | 0.723     | 0.888           |
| 5253 | Luzindole                                                                       | Toots   | 4        | G   | 2      | 0.262     | 0.204           |
| 5254 | RS 45041-190 hydrochloride                                                      | Toots   | 4        | H   | 2      | -0.857    | 0.988           |
| 5255 | Vinpocetine                                                                     | Toots   | 4        | A   | 3      | -0.131    | -0.059          |
| 5256 | (+)-UH 232 maleate                                                              | Toots   | 4        | B   | 3      | -0.032    | 0.455           |
| 5257 | Aminoguanidine hydrochloride                                                    | Toots   | 4        | C   | 3      | 0.076     | 1.312           |
| 5258 | Nefazodone hydrochloride                                                        | Toots   | 4        | D   | 3      | 0.319     | -0.256          |
| 5259 | (S)-(-)-Propranolol hydrochloride                                               | Toots   | 4        | E   | 3      | 0.731     | 0.358           |
| 5260 | GR 46611                                                                        | Toots   | 4        | F   | 3      | 0.875     | -0.109          |
| 5261 | Oleamide                                                                        | Toots   | 4        | G   | 3      | 0.368     | 0.385           |
| 5262 | Amiloride hydrochloride                                                         | Toots   | 4        | H   | 3      | -0.665    | 0.432           |
| 5263 | Castanospermine                                                                 | Toots   | 4        | A   | 4      | -0.074    | 0.898           |
| 5264 | ICI 199,441 hydrochloride                                                       | Toots   | 4        | B   | 4      | -0.084    | -1.067          |
| 5265 | 3-Aminobenzamide                                                                | Toots   | 4        | C   | 4      | 0.707     | 2.33            |
| 5266 | ICI 118,551 hydrochloride                                                       | Toots   | 4        | D   | 4      | 0.382     | -0.535          |
| 5267 | (R)-(+)-Propranolol hydrochloride                                               | Toots   | 4        | E   | 4      | 0.327     | 0.002           |
| 5268 | Aniracetam                                                                      | Toots   | 4        | F   | 4      | 0.411     | -0.963          |
| 5269 | Palmitoylethanolamide                                                           | Toots   | 4        | G   | 4      | -0.018    | -0.128          |
| 5270 | Rauwolfscine hydrochloride                                                      | Toots   | 4        | H   | 4      | -0.38     | 0.139           |
| 5271 | AM 580                                                                          | Toots   | 4        | A   | 5      | 0.501     | 0.183           |
| 5272 | Iodophenpropit dihydrobromide                                                   | Toots   | 4        | B   | 5      | 0.289     | -0.823          |
| 5273 | Rilmendine hemifumarate                                                         | Toots   | 4        | C   | 5      | 0.259     | 0.47            |
| 5274 | ICI 204,448 hydrochloride                                                       | Toots   | 4        | D   | 5      | 0.316     | 1.003           |
| 5275 | ICI 185 282                                                                     | Toots   | 4        | E   | 5      | 0.44      | 1.656           |
| 5276 | L-732,138                                                                       | Toots   | 4        | F   | 5      | 0.055     | 0.477           |
| 5277 | ODQ                                                                             | Toots   | 4        | G   | 5      | 0.347     | -1.085          |
| 5278 | Naltrexone mesylate                                                             | Toots   | 4        | H   | 5      | -0.452    | 0.202           |
| 5279 | TTNPB                                                                           | Toots   | 4        | A   | 6      | -0.043    | -1.111          |
| 5280 | NCS-382                                                                         | Toots   | 4        | B   | 6      | 0.381     | -0.784          |
| 5281 | Antazoline hydrochloride                                                        | Toots   | 4        | C   | 6      | 0.089     | 0.118           |
| 5282 | Clofibric acid                                                                  | Toots   | 4        | D   | 6      | 0.328     | 1.476           |
| 5283 | ICI 192,605                                                                     | Toots   | 4        | E   | 6      | 0.322     | -0.134          |
| 5284 | Felbamate                                                                       | Toots   | 4        | F   | 6      | -0.08     | -0.5            |
| 5285 | Chlormethiazole hydrochloride                                                   | Toots   | 4        | G   | 6      | -0.08     | -1.642          |
| 5286 | (RS)-(-)-Sulpiride                                                              | Toots   | 4        | H   | 6      | -0.611    | -0.174          |
| 5287 | N-[2-(Piperidinylamino)ethyl]-4-iodobenzamide                                   | Toots   | 4        | A   | 7      | 0.154     | -0.708          |
| 5288 | L-694,247                                                                       | Toots   | 4        | B   | 7      | 0.473     | -0.405          |
| 5289 | Efaroxan hydrochloride                                                          | Toots   | 4        | C   | 7      | 0.417     | -0.575          |
| 5290 | Tiotidine                                                                       | Toots   | 4        | D   | 7      | 0.463     | 1.365           |
| 5291 | DHBP dibromide                                                                  | Toots   | 4        | E   | 7      | 0.822     | 0.221           |
| 5292 | MDL 11,939                                                                      | Toots   | 4        | F   | 7      | 0.871     | 0.233           |
| 5293 | ZM 226600                                                                       | Toots   | 4        | G   | 7      | -0.211    | -0.545          |
| 5294 | (S)-(-)-Sulpiride                                                               | Toots   | 4        | H   | 7      | -0.055    | -0.222          |
| 5295 | SNC 80                                                                          | Toots   | 4        | A   | 8      | 0.055     | -0.793          |
| 5296 | 2-Chloro-11-(4-methylpiperazino)dibenz[b,f]oxepin maleate                       | Toots   | 4        | B   | 8      | 0.309     | -1.286          |
| 5297 | Idazoxan hydrochloride                                                          | Toots   | 4        | C   | 8      | 0.063     | -1.877          |
| 5298 | Pronethalol hydrochloride                                                       | Toots   | 4        | D   | 8      | 0.017     | -0.307          |
| 5299 | Loperamide hydrochloride                                                        | Toots   | 4        | E   | 8      | -0.051    | 1.187           |
| 5300 | AMT hydrochloride                                                               | Toots   | 4        | F   | 8      | 0.573     | -0.452          |
| 5301 | BD 1063 dihydrochloride                                                         | Toots   | 4        | G   | 8      | 0.305     | -0.545          |
| 5302 | GR 135631                                                                       | Toots   | 4        | H   | 8      | -0.054    | 0.838           |
| 5303 | Bifemelane                                                                      | Toots   | 4        | A   | 9      | -0.262    | -0.758          |
| 5304 | N-Methyl-N-[(1S)-1-phenyl-2-(1-pyrrolidinyl)ethyl]phenylacetamide hydrochloride | Toots   | 4        | B   | 9      | 0.123     | -1.633          |



SUPPLEMENTARY DATA

|      | Name                                                    | Library | Plate No | Row | Column | ROS score | viability score |
|------|---------------------------------------------------------|---------|----------|-----|--------|-----------|-----------------|
| 5305 | 8-Hydroxy-PIPAT                                         | Toons   | 4        | C   | 9      | 0.539     | -0.634          |
| 5306 | Primidone                                               | Toons   | 4        | D   | 9      | -0.023    | -0.848          |
| 5307 | DTG                                                     | Toons   | 4        | E   | 9      | -0.254    | -0.292          |
| 5308 | EIT hydrobromide                                        | Toons   | 4        | F   | 9      | 0.283     | -1.383          |
| 5309 | Dihydropyridine hydrochloride                           | Toons   | 4        | G   | 9      | 0.472     | -1.307          |
| 5310 | S-Isopropylisothiourea hydrobromide                     | Toons   | 4        | H   | 9      | -0.225    | -0.589          |
| 5311 | Riluzole hydrochloride                                  | Toons   | 4        | A   | 10     | -0.518    | -0.353          |
| 5312 | Ketotifen fumarate                                      | Toons   | 4        | B   | 10     | -0.003    | -0.709          |
| 5313 | 7-NINA                                                  | Toons   | 4        | C   | 10     | 0.417     | 0.273           |
| 5314 | Practolol                                               | Toons   | 4        | D   | 10     | 0.129     | 0.92            |
| 5315 | Oxotremorine sesquifumarate                             | Toons   | 4        | E   | 10     | 0.601     | -2.454          |
| 5316 | m-CPP hydrochloride                                     | Toons   | 4        | F   | 10     | 0.41      | -0.448          |
| 5317 | Guanabenz acetate                                       | Toons   | 4        | G   | 10     | -0.323    | 0.176           |
| 5318 | BNTX maleate                                            | Toons   | 4        | H   | 10     | -0.488    | -0.855          |
| 5319 | Carboxy-PTIO, potassium salt                            | Toons   | 4        | A   | 11     | -0.403    | 0.297           |
| 5320 | SB 203186 hydrochloride                                 | Toons   | 4        | B   | 11     | -0.193    | -0.631          |
| 5321 | (S)-3,5-DHPG                                            | Toons   | 4        | C   | 11     | -0.248    | 3.679           |
| 5322 | ICI 89406                                               | Toons   | 4        | D   | 11     | 0.289     | 1.148           |
| 5323 | Statil                                                  | Toons   | 4        | E   | 11     | -0.584    | 0.085           |
| 5324 | AM 92016 hydrochloride                                  | Toons   | 4        | F   | 11     | 0.037     | 0.485           |
| 5325 | Cirazoline hydrochloride                                | Toons   | 4        | G   | 11     | 0.167     | -0.073          |
| 5326 | 5-Nonyloxytryptamine oxalate                            | Toons   | 4        | H   | 11     | -0.551    | -0.188          |
| 5327 | Cimetidine                                              | Toons   | 5        | A   | 2      | -1.33     | -1.192          |
| 5328 | Remoxipride hydrochloride                               | Toons   | 5        | B   | 2      | -0.209    | -0.938          |
| 5329 | ARC 239 dihydrochloride                                 | Toons   | 5        | C   | 2      | 0.131     | -0.8            |
| 5330 | NS 398                                                  | Toons   | 5        | D   | 2      | -0.031    | -0.589          |
| 5331 | Piroxicam                                               | Toons   | 5        | E   | 2      | 1.174     | 0.086           |
| 5332 | RS 79948 hydrochloride                                  | Toons   | 5        | F   | 2      | -0.004    | 0.983           |
| 5333 | Mianserin hydrochloride                                 | Toons   | 5        | G   | 2      | -0.578    | 0.888           |
| 5334 | QX 314                                                  | Toons   | 5        | H   | 2      | -1.281    | 1.993           |
| 5335 | Rolipram                                                | Toons   | 5        | A   | 3      | -1.196    | -0.736          |
| 5336 | 3a-[4-Chlorophenyl]phenylmethoxy] tropane hydrochloride | Toons   | 5        | B   | 3      | 1.425     | -0.815          |
| 5337 | ICI 215,001 hydrochloride                               | Toons   | 5        | C   | 3      | 0.658     | -0.647          |
| 5338 | WB 4101 hydrochloride                                   | Toons   | 5        | D   | 3      | 0         | -0.849          |
| 5339 | SYM 2206                                                | Toons   | 5        | E   | 3      | 0.088     | 0.099           |
| 5340 | RS 56812 hydrochloride                                  | Toons   | 5        | F   | 3      | 0.406     | 0.355           |
| 5341 | AH 11110 hydrochloride                                  | Toons   | 5        | G   | 3      | -0.819    | 1.023           |
| 5342 | RS 16566 dihydrochloride                                | Toons   | 5        | H   | 3      | -0.035    | 1.952           |
| 5343 | Betaxolol hydrochloride                                 | Toons   | 5        | A   | 4      | -1.625    | -1.174          |
| 5344 | 3a-Bis-(4-Fluorophenyl) methoxytropane hydrochloride    | Toons   | 5        | B   | 4      | 0.17      | -0.575          |
| 5345 | ZD 7114 hydrochloride                                   | Toons   | 5        | C   | 4      | 0.144     | -0.788          |
| 5346 | Zaprinast                                               | Toons   | 5        | D   | 4      | 0.097     | -0.334          |
| 5347 | Buspirone hydrochloride                                 | Toons   | 5        | E   | 4      | 0.2       | -0.295          |
| 5348 | RS 67333 hydrochloride                                  | Toons   | 5        | F   | 4      | 0.003     | -0.104          |
| 5349 | Tamoxifen citrate                                       | Toons   | 5        | G   | 4      | -0.678    | 3.091           |
| 5350 | LY 225910                                               | Toons   | 5        | H   | 4      | -2.209    | 4.079           |
| 5351 | L-701,324                                               | Toons   | 5        | A   | 5      | -0.85     | -0.273          |
| 5352 | TRIM                                                    | Toons   | 5        | B   | 5      | 0.281     | -0.65           |
| 5353 | Haloperidol hydrochloride                               | Toons   | 5        | C   | 5      | 0.315     | -0.303          |
| 5354 | BRL 37344, sodium salt                                  | Toons   | 5        | D   | 5      | 0.274     | -0.141          |
| 5355 | 9-AC                                                    | Toons   | 5        | E   | 5      | 0.888     | -0.132          |
| 5356 | RS 67506 hydrochloride                                  | Toons   | 5        | F   | 5      | 0.499     | 0.619           |
| 5357 | ZD 7288                                                 | Toons   | 5        | G   | 5      | 0.274     | 0.16            |
| 5358 | CGP 20712                                               | Toons   | 5        | H   | 5      | -1.541    | 1.39            |
| 5359 | Ketanserin tartrate                                     | Toons   | 5        | A   | 6      | -0.449    | 0.078           |
| 5360 | SB 205607 dihydrobromide                                | Toons   | 5        | B   | 6      | 1.32      | -0.751          |
| 5361 | Immepip dihydrobromide                                  | Toons   | 5        | C   | 6      | 1.06      | -0.203          |
| 5362 | CP 55,540                                               | Toons   | 5        | D   | 6      | 0.441     | 0.217           |
| 5363 | Diazoxide                                               | Toons   | 5        | E   | 6      | 0.201     | -0.35           |
| 5364 | RS 39604 hydrochloride                                  | Toons   | 5        | F   | 6      | 0.498     | 1.589           |
| 5365 | Chlorisondamine diiodide                                | Toons   | 5        | G   | 6      | 0.101     | 0.6             |
| 5366 | Nisoxetine hydrochloride                                | Toons   | 5        | H   | 6      | -0.378    | 0.523           |
| 5367 | Tropicamide                                             | Toons   | 5        | A   | 7      | -0.303    | -0.387          |
| 5368 | SKF 38393 hydrobromide                                  | Toons   | 5        | B   | 7      | 0.598     | -0.14           |
| 5369 | MM 77 dihydrochloride                                   | Toons   | 5        | C   | 7      | -0.314    | -0.649          |
| 5370 | Xamoterol hemifumarate                                  | Toons   | 5        | D   | 7      | 0.299     | -0.118          |
| 5371 | Tacrine hydrochloride                                   | Toons   | 5        | E   | 7      | 0.578     | 0.371           |
| 5372 | Isamoltane hemifumarate                                 | Toons   | 5        | F   | 7      | 0.301     | 0.295           |
| 5373 | L-745,870 trihydrochloride                              | Toons   | 5        | G   | 7      | -0.491    | 0.607           |
| 5374 | HomoAMPA                                                | Toons   | 5        | H   | 7      | -0.765    | 0.787           |
| 5375 | Glibenclamide                                           | Toons   | 5        | A   | 8      | -0.208    | -0.884          |
| 5376 | (+)-MK 801 maleate                                      | Toons   | 5        | B   | 8      | -0.214    | -0.765          |
| 5377 | Olvanil                                                 | Toons   | 5        | C   | 8      | 0.584     | -0.858          |
| 5378 | Sotalol hydrochloride                                   | Toons   | 5        | D   | 8      | 0.697     | -0.499          |
| 5379 | 1-Phenylbiguanide hydrochloride                         | Toons   | 5        | E   | 8      | -0.387    | 0.448           |
| 5380 | Cyanopindolol hemifumarate                              | Toons   | 5        | F   | 8      | -0.05     | -0.542          |
| 5381 | L-741,626                                               | Toons   | 5        | G   | 8      | 0.278     | 0.444           |
| 5382 | PHCCC                                                   | Toons   | 5        | H   | 8      | -1.371    | 1.132           |
| 5383 | RU 24969 hemisuccinate                                  | Toons   | 5        | A   | 9      | -0.127    | -0.215          |
| 5384 | SCH 23390 hydrochloride                                 | Toons   | 5        | B   | 9      | 0.427     | -1.284          |
| 5385 | Maprotiline hydrochloride                               | Toons   | 5        | C   | 9      | 1.226     | -1.524          |
| 5386 | (-)-MK 801 maleate                                      | Toons   | 5        | D   | 9      | 1.228     | -0.505          |
| 5387 | Cycloheximide                                           | Toons   | 5        | E   | 9      | 3.118     | -3.514          |
| 5388 | Pindolol                                                | Toons   | 5        | F   | 9      | 0.549     | -0.247          |
| 5389 | L-741,742 hydrochloride                                 | Toons   | 5        | G   | 9      | -0.447    | 0.518           |
| 5390 | CPCCOEt                                                 | Toons   | 5        | H   | 9      | -0.795    | 0.876           |
| 5391 | (±)-Bisoprolol hemifumarate                             | Toons   | 5        | A   | 10     | 0.002     | -0.341          |
| 5392 | b-Funaltrexamine hydrochloride                          | Toons   | 5        | B   | 10     | 0.232     | -0.009          |
| 5393 | Pimozide                                                | Toons   | 5        | C   | 10     | 1.904     | -0.114          |
| 5394 | BD 1047 dihydrobromide                                  | Toons   | 5        | D   | 10     | 0.679     | 0.414           |
| 5395 | RS 17053 hydrochloride                                  | Toons   | 5        | E   | 10     | -1.207    | -0.124          |
| 5396 | Spiperone                                               | Toons   | 5        | F   | 10     | 1.213     | 0.134           |
| 5397 | BMY 7378 dihydrochloride                                | Toons   | 5        | G   | 10     | -0.448    | 0.241           |
| 5398 | Methyllycaonitine citrate                               | Toons   | 5        | H   | 10     | -0.353    | 0.815           |
| 5399 | Cilostamide                                             | Toons   | 5        | A   | 11     | -0.143    | -0.328          |
| 5400 | Fluoxetine hydrochloride                                | Toons   | 5        | B   | 11     | 0.097     | -1.25           |
| 5401 | 4-Aminopyridine                                         | Toons   | 5        | C   | 11     | 0.655     | -0.733          |
| 5402 | Spermidine trihydrochloride                             | Toons   | 5        | D   | 11     | 0.432     | -0.252          |
| 5403 | Imiloxan hydrochloride                                  | Toons   | 5        | E   | 11     | 0.283     | 0.064           |
| 5404 | Cyproheptadine hydrochloride                            | Toons   | 5        | F   | 11     | 0.135     | -0.178          |
| 5405 | N-Desmethylozapine                                      | Toons   | 5        | G   | 11     | -0.06     | 0.177           |
| 5406 | Guanfacine hydrochloride                                | Toons   | 5        | H   | 11     | -0.905    | 0.693           |
| 5407 | Piribedil hydrochloride                                 | Toons   | 6        | A   | 2      | 0.692     | 1.923           |
| 5408 | NBQX disodium salt                                      | Toons   | 6        | B   | 2      | 0.422     | 0.4             |
| 5409 | BW 723C86 hydrochloride                                 | Toons   | 6        | C   | 2      | -0.247    | 0.873           |

SUPPLEMENTARY DATA

|      | Name                                | Library | Plate No | Row | Column | ROS score | viability score |
|------|-------------------------------------|---------|----------|-----|--------|-----------|-----------------|
| 5410 | (RS)-AMPA hydrobromide              | Toots   | 6        | D   | 2      | 0.481     | 0.54            |
| 5411 | BU 226 hydrochloride                | Toots   | 6        | E   | 2      | 0.834     | -0.087          |
| 5412 | Ketocoazole                         | Toots   | 6        | F   | 2      | -0.044    | -0.308          |
| 5413 | AM 630                              | Toots   | 6        | G   | 2      | -0.085    | -0.52           |
| 5414 | Harmaline hydrochloride             | Toots   | 6        | H   | 2      | -0.168    | 0.366           |
| 5415 | CP 93129 dihydrochloride            | Toots   | 6        | A   | 3      | -0.077    | 1.778           |
| 5416 | CNOX disodium salt                  | Toots   | 6        | B   | 3      | 0.362     | 0.882           |
| 5417 | (S)-(-)-Pindolol                    | Toots   | 6        | C   | 3      | 0.333     | 0.881           |
| 5418 | Nifedipine                          | Toots   | 6        | D   | 3      | 0.448     | 1.06            |
| 5419 | Pirfenidone                         | Toots   | 6        | E   | 3      | 0.451     | -0.523          |
| 5420 | 2-Cl-IB-MECA                        | Toots   | 6        | F   | 3      | 0.368     | 0.727           |
| 5421 | Telenzepine dihydrochloride         | Toots   | 6        | G   | 3      | -0.521    | -0.548          |
| 5422 | BRL 44408 maleate                   | Toots   | 6        | H   | 3      | -0.125    | 0.728           |
| 5423 | Fluvoxamine maleate                 | Toots   | 6        | A   | 4      | -0.959    | -0.348          |
| 5424 | Zardaverine                         | Toots   | 6        | B   | 4      | -0.085    | 0.381           |
| 5425 | (-) Quinpirole hydrochloride        | Toots   | 6        | C   | 4      | -0.132    | 0.191           |
| 5426 | Ouabain                             | Toots   | 6        | D   | 4      | 0.183     | 0.201           |
| 5427 | Zopiclone                           | Toots   | 6        | E   | 4      | -0.013    | -0.362          |
| 5428 | AF-DX 116                           | Toots   | 6        | F   | 4      | 0.115     | -1.017          |
| 5429 | (S)-(+)-Niguldipine hydrochloride   | Toots   | 6        | G   | 4      | 0.5       | -1.082          |
| 5430 | CGP 12177 hydrochloride             | Toots   | 6        | H   | 4      | -0.299    | -0.015          |
| 5431 | 4-P-PDOT                            | Toots   | 6        | A   | 5      | -0.181    | 1.081           |
| 5432 | ICI 182,780                         | Toots   | 6        | B   | 5      | 0.358     | 1.032           |
| 5433 | CGS 21680 hydrochloride             | Toots   | 6        | C   | 5      | -0.211    | -0.286          |
| 5434 | Lobeline hydrochloride              | Toots   | 6        | D   | 5      | 0.173     | -0.183          |
| 5435 | (R)-(-)-Deprenyl hydrochloride      | Toots   | 6        | E   | 5      | 1.101     | -0.586          |
| 5436 | ATPA                                | Toots   | 6        | F   | 5      | 0.285     | -0.718          |
| 5437 | (R)-(-)-Niguldipine hydrochloride   | Toots   | 6        | G   | 5      | 0.786     | -1.786          |
| 5438 | L-NIL hydrochloride                 | Toots   | 6        | H   | 5      | -0.418    | 0.507           |
| 5439 | 8-M-PDOT                            | Toots   | 6        | A   | 6      | -0.326    | -0.042          |
| 5440 | 1-BCP                               | Toots   | 6        | B   | 6      | 1.379     | 0.113           |
| 5441 | Methysergide maleate                | Toots   | 6        | C   | 6      | 1.175     | 0.226           |
| 5442 | (+)-SK&F 10047 hydrochloride        | Toots   | 6        | D   | 6      | 1.173     | -0.152          |
| 5443 | Taxol                               | Toots   | 6        | E   | 6      | 1.445     | -2.173          |
| 5444 | GR 103691                           | Toots   | 6        | F   | 6      | 0.832     | -0.586          |
| 5445 | Quercetin                           | Toots   | 6        | G   | 6      | -0.343    | -1.182          |
| 5446 | 8-Bromo-cAMP, sodium salt           | Toots   | 6        | H   | 6      | 0.128     | 0.384           |
| 5447 | ZM 241385                           | Toots   | 6        | A   | 7      | -0.524    | -0.316          |
| 5448 | CHPG                                | Toots   | 6        | B   | 7      | -0.071    | -0.026          |
| 5449 | PD 168077 maleate                   | Toots   | 6        | C   | 7      | 0.452     | 1.233           |
| 5450 | (R)-(+)-8-Hydroxy-DPAT hydrobromide | Toots   | 6        | D   | 7      | -0.408    | 1.215           |
| 5451 | Tranilast                           | Toots   | 6        | E   | 7      | 0.493     | 0.426           |
| 5452 | Genistein                           | Toots   | 6        | F   | 7      | 0.288     | 0.666           |
| 5453 | Dexamethasone                       | Toots   | 6        | G   | 7      | 1.023     | -2.966          |
| 5454 | Dibutyryl-cAMP, sodium salt         | Toots   | 6        | H   | 7      | -0.661    | 1.782           |
| 5455 | WIN 55,212-2 mesylate               | Toots   | 6        | A   | 8      | -0.582    | -0.337          |
| 5456 | RS 102221 hydrochloride             | Toots   | 6        | B   | 8      | 0.348     | 0.828           |
| 5457 | IB-MECA                             | Toots   | 6        | C   | 8      | 0.274     | 0.321           |
| 5458 | SKF 89976A hydrochloride            | Toots   | 6        | D   | 8      | 0.082     | 0.826           |
| 5459 | Forskolin                           | Toots   | 6        | E   | 8      | 0.842     | -0.478          |
| 5460 | CGP 37157                           | Toots   | 6        | F   | 8      | 0.387     | -1.323          |
| 5461 | Yohimbine hydrochloride             | Toots   | 6        | G   | 8      | -0.132    | -0.438          |
| 5462 | Oxymetazoline hydrochloride         | Toots   | 6        | H   | 8      | -0.012    | 0.704           |
| 5463 | 1-EBIO                              | Toots   | 6        | A   | 9      | -0.243    | -0.243          |
| 5464 | A 61603 hydrobromide                | Toots   | 6        | B   | 9      | 0.442     | 0.511           |
| 5465 | Oxotremorine M                      | Toots   | 6        | C   | 9      | 0.885     | -0.314          |
| 5466 | CFM-2                               | Toots   | 6        | D   | 9      | 0.104     | 0.154           |
| 5467 | Camptothecin                        | Toots   | 6        | E   | 9      | 1.028     | -3.784          |
| 5468 | AM 281                              | Toots   | 6        | F   | 9      | -0.317    | -0.52           |
| 5469 | BRL 54443                           | Toots   | 6        | G   | 9      | -0.251    | -0.66           |
| 5470 | Corynanthine hydrochloride          | Toots   | 6        | H   | 9      | -0.279    | 0.784           |
| 5471 | N-Methylidocaine iodide             | Toots   | 6        | A   | 10     | -0.335    | -1.195          |
| 5472 | GR 55662 dihydrochloride            | Toots   | 6        | B   | 10     | 0.393     | 2.247           |
| 5473 | Zolantidine dimaleate               | Toots   | 6        | C   | 10     | -0.18     | 0.535           |
| 5474 | CGP 54626 hydrochloride             | Toots   | 6        | D   | 10     | 0.281     | 0.287           |
| 5475 | Cyclosporin A                       | Toots   | 6        | E   | 10     | 0.216     | -0.636          |
| 5476 | AM 404                              | Toots   | 6        | F   | 10     | 0.098     | -0.807          |
| 5477 | LY 294002 hydrochloride             | Toots   | 6        | G   | 10     | 0.328     | 0.497           |
| 5478 | U0126                               | Toots   | 6        | H   | 10     | -0.55     | 0.679           |
| 5479 | QX 222                              | Toots   | 6        | A   | 11     | 0.12      | -1.453          |
| 5480 | WIN 64338 hydrochloride             | Toots   | 6        | B   | 11     | -0.538    | -1.318          |
| 5481 | AGN 192403 hydrochloride            | Toots   | 6        | C   | 11     | 0.721     | 0.365           |
| 5482 | 8-Bromo-cGMP, sodium salt           | Toots   | 6        | D   | 11     | -0.281    | -0.491          |
| 5483 | Procaterol hydrochloride            | Toots   | 6        | E   | 11     | 0.392     | 0.287           |
| 5484 | AM 251                              | Toots   | 6        | F   | 11     | -0.168    | 1.254           |
| 5485 | KU14R                               | Toots   | 6        | G   | 11     | -0.184    | -0.294          |
| 5486 | L-733,060 hydrochloride             | Toots   | 6        | H   | 11     | -1.174    | 0.821           |
| 5487 | SKF 96365 hydrochloride             | Toots   | 7        | A   | 2      | -0.488    | 0.722           |
| 5488 | PD 98059                            | Toots   | 7        | B   | 2      | -0.163    | 1.131           |
| 5489 | Nocodazole                          | Toots   | 7        | C   | 2      | 0.991     | -0.023          |
| 5490 | CCMQ                                | Toots   | 7        | D   | 2      | 0.027     | 0.214           |
| 5491 | SDZ SER 082 fumarate                | Toots   | 7        | E   | 2      | 0.088     | 0.403           |
| 5492 | Decitabine                          | Toots   | 7        | F   | 2      | 0.514     | 0.175           |
| 5493 | Monastrol                           | Toots   | 7        | G   | 2      | 0.408     | 0.492           |
| 5494 | RS 100329 hydrochloride             | Toots   | 7        | H   | 2      | -0.199    | 0.575           |
| 5495 | Siguazodan                          | Toots   | 7        | A   | 3      | -0.454    | 0.595           |
| 5496 | SIB 1893                            | Toots   | 7        | B   | 3      | -0.089    | 0.567           |
| 5497 | Actinomycin D                       | Toots   | 7        | C   | 3      | 2.804     | -4.488          |
| 5498 | SB 216641 hydrochloride             | Toots   | 7        | D   | 3      | 0.636     | -0.136          |
| 5499 | Vinblastine sulfate                 | Toots   | 7        | E   | 3      | 0.08      | -0.401          |
| 5500 | GR 159897                           | Toots   | 7        | F   | 3      | 0.155     | 0.074           |
| 5501 | Ciglitazone                         | Toots   | 7        | G   | 3      | 0.784     | 0.232           |
| 5502 | BADGE                               | Toots   | 7        | H   | 3      | -0.742    | 0.357           |
| 5503 | SB 203580                           | Toots   | 7        | A   | 4      | -0.417    | 0.797           |
| 5504 | SIB 1757                            | Toots   | 7        | B   | 4      | 0.023     | -1.08           |
| 5505 | Methotrexate                        | Toots   | 7        | C   | 4      | 0.508     | 0.011           |
| 5506 | (+)-PD 128907 hydrochloride         | Toots   | 7        | D   | 4      | 0.454     | -0.371          |
| 5507 | Vincristine sulfate                 | Toots   | 7        | E   | 4      | 0.89      | -0.375          |
| 5508 | GNTI dihydrochloride                | Toots   | 7        | F   | 4      | 0.334     | -0.234          |
| 5509 | PPNDS                               | Toots   | 7        | G   | 4      | -0.383    | 0.131           |
| 5510 | L-655,708                           | Toots   | 7        | H   | 4      | -0.005    | -0.094          |
| 5511 | SR 57227 hydrochloride              | Toots   | 7        | A   | 5      | 0.282     | -0.045          |
| 5512 | MRS 1220                            | Toots   | 7        | B   | 5      | -0.354    | 2.673           |
| 5513 | Brefeldin A                         | Toots   | 7        | C   | 5      | 2.135     | -0.354          |
| 5514 | KB-R7943 mesylate                   | Toots   | 7        | D   | 5      | 1.014     | 0.047           |

SUPPLEMENTARY DATA

|      | Name                                | Library | Plate No | Row | Column | ROS score | viability score |
|------|-------------------------------------|---------|----------|-----|--------|-----------|-----------------|
| 5515 | 1-Deoxynojirimycin                  | Toxits  | 7        | E   | 5      | 0.127     | 0               |
| 5516 | Olomoucine                          | Toxits  | 7        | F   | 5      | 0.435     | 0.052           |
| 5517 | UCL 1684                            | Toxits  | 7        | G   | 5      | -0.052    | 0.213           |
| 5518 | Flumazenil                          | Toxits  | 7        | H   | 5      | -0.53     | 0.376           |
| 5519 | SC 19220                            | Toxits  | 7        | A   | 6      | -0.308    | 0.4             |
| 5520 | DH 97                               | Toxits  | 7        | B   | 6      | -0.011    | 0.057           |
| 5521 | Wortmannin                          | Toxits  | 7        | C   | 6      | 0.464     | -0.183          |
| 5522 | CGP 55845                           | Toxits  | 7        | D   | 6      | 0.461     | -0.211          |
| 5523 | 1-Deoxymannojirimycin hydrochloride | Toxits  | 7        | E   | 6      | 0.272     | -0.146          |
| 5524 | Anisomycin                          | Toxits  | 7        | F   | 6      | 1.206     | -3.254          |
| 5525 | WY 14643                            | Toxits  | 7        | G   | 6      | -0.209    | 0.224           |
| 5526 | JWH 015                             | Toxits  | 7        | H   | 6      | -0.982    | 0.373           |
| 5527 | BRL 15572 hydrochloride             | Toxits  | 7        | A   | 7      | 0.209     | 0.253           |
| 5528 | IDRA 21                             | Toxits  | 7        | B   | 7      | -0.017    | 0.193           |
| 5529 | Cytochalasin D                      | Toxits  | 7        | C   | 7      | 1.936     | -4.103          |
| 5530 | CY 208-243                          | Toxits  | 7        | D   | 7      | 0.182     | 0.808           |
| 5531 | Ivermectin                          | Toxits  | 7        | E   | 7      | 0.395     | 0.225           |
| 5532 | Loreclezole hydrochloride           | Toxits  | 7        | F   | 7      | 0.017     | 0.089           |
| 5533 | CP 94253 hydrochloride              | Toxits  | 7        | G   | 7      | -0.278    | 0.593           |
| 5534 | AF-DX 384                           | Toxits  | 7        | H   | 7      | -0.338    | -0.103          |
| 5535 | LY 341495                           | Toxits  | 7        | A   | 8      | -0.258    | 0.406           |
| 5536 | DL-TBOA                             | Toxits  | 7        | B   | 8      | 0.403     | 0.281           |
| 5537 | A23187, free acid                   | Toxits  | 7        | C   | 8      | 1.996     | -2.907          |
| 5538 | SDZ 220-581                         | Toxits  | 7        | D   | 8      | 0.452     | -0.412          |
| 5539 | SR 95531 hydrobromide               | Toxits  | 7        | E   | 8      | 0.587     | -0.06           |
| 5540 | CI 966                              | Toxits  | 7        | F   | 8      | 0.35      | -0.231          |
| 5541 | ZM 336372                           | Toxits  | 7        | G   | 8      | 0.043     | 0.138           |
| 5542 | Nafadotride                         | Toxits  | 7        | H   | 8      | -0.973    | -0.145          |
| 5543 | FR 139317                           | Toxits  | 7        | A   | 9      | -1.112    | 0.624           |
| 5544 | Z-APB                               | Toxits  | 7        | B   | 9      | -0.203    | 0.954           |
| 5545 | Cyclopiazonic Acid                  | Toxits  | 7        | C   | 9      | 0.039     | 0.923           |
| 5546 | SDZ 220-040                         | Toxits  | 7        | D   | 9      | 0.041     | 0.425           |
| 5547 | GR 144053 trihydrochloride          | Toxits  | 7        | E   | 9      | -0.293    | 0.374           |
| 5548 | LFM-A13                             | Toxits  | 7        | F   | 9      | -0.211    | 0.852           |
| 5549 | GR 113808                           | Toxits  | 7        | G   | 9      | -0.01     | 0.549           |
| 5550 | UB 185 fumarate                     | Toxits  | 7        | H   | 9      | -0.71     | -0.222          |
| 5551 | ZD 7155 hydrochloride               | Toxits  | 7        | A   | 10     | -0.587    | 0.513           |
| 5552 | Etoposide                           | Toxits  | 7        | B   | 10     | 0.187     | -0.847          |
| 5553 | BHQ                                 | Toxits  | 7        | C   | 10     | 0.287     | 0.122           |
| 5554 | [S]-WAY 100135 dihydrochloride      | Toxits  | 7        | D   | 10     | 0.121     | -0.183          |
| 5555 | SB 202190                           | Toxits  | 7        | E   | 10     | -0.131    | 0.742           |
| 5556 | [S]-3,4-DCPG                        | Toxits  | 7        | F   | 10     | -0.252    | -0.122          |
| 5557 | Butabindide oxalate                 | Toxits  | 7        | G   | 10     | 0.08      | -0.006          |
| 5558 | [R]-(-)-Risperidone                 | Toxits  | 7        | H   | 10     | -0.499    | -0.445          |
| 5559 | MPEP hydrochloride                  | Toxits  | 7        | A   | 11     | -0.751    | 0.249           |
| 5560 | Acipimox                            | Toxits  | 7        | B   | 11     | -0.311    | 0.857           |
| 5561 | SNAP 5088                           | Toxits  | 7        | C   | 11     | 0.179     | -0.415          |
| 5562 | Y-27632 dihydrochloride             | Toxits  | 7        | D   | 11     | 0.027     | -0.364          |
| 5563 | Pifithrin- $\alpha$ hydrobromide    | Toxits  | 7        | E   | 11     | 0.279     | 1.217           |
| 5564 | BW-B 70C                            | Toxits  | 7        | F   | 11     | -0.024    | 0.042           |
| 5565 | RX 821002 hydrochloride             | Toxits  | 7        | G   | 11     | -0.453    | -0.371          |
| 5566 | [S]-(+)-Risperidone                 | Toxits  | 7        | H   | 11     | -0.994    | -0.1            |
| 5567 | P1075                               | Toxits  | 8        | A   | 2      | -1.48     | 0.302           |
| 5568 | Cromakalim                          | Toxits  | 8        | B   | 2      | 0.225     | 2.037           |
| 5569 | SB 22200                            | Toxits  | 8        | C   | 2      | -0.506    | 0.478           |
| 5570 | FPL 64176                           | Toxits  | 8        | D   | 2      | 0.109     | 0.327           |
| 5571 | Daidzein                            | Toxits  | 8        | E   | 2      | 1.284     | 0.637           |
| 5572 | BMS 182874 hydrochloride            | Toxits  | 8        | F   | 2      | -0.874    | 0.122           |
| 5573 | Flecainide acetate                  | Toxits  | 8        | G   | 2      | 0.157     | 0.236           |
| 5574 | DPN                                 | Toxits  | 8        | H   | 2      | -1.602    | -0.032          |
| 5575 | MG 624                              | Toxits  | 8        | A   | 3      | -1.407    | 0.187           |
| 5576 | Levcromakalim                       | Toxits  | 8        | B   | 3      | 1.091     | -1.334          |
| 5577 | [RS]-3,4-DCPG                       | Toxits  | 8        | C   | 3      | -0.091    | 0.253           |
| 5578 | Terreic acid                        | Toxits  | 8        | D   | 3      | 0.733     | 0.479           |
| 5579 | Resveratrol                         | Toxits  | 8        | E   | 3      | 0.855     | 0.126           |
| 5580 | BMV 45778                           | Toxits  | 8        | F   | 3      | 0.325     | -0.144          |
| 5581 | Etomidate                           | Toxits  | 8        | G   | 3      | 0.278     | 0.337           |
| 5582 | SP 600125                           | Toxits  | 8        | H   | 3      | -0.073    | 0.128           |
| 5583 | U 99194 maleate                     | Toxits  | 8        | A   | 4      | -1.15     | 0.462           |
| 5584 | SB 221284                           | Toxits  | 8        | B   | 4      | -0.814    | -0.084          |
| 5585 | [R]-3,4-DCPG                        | Toxits  | 8        | C   | 4      | 0.09      | 1.071           |
| 5586 | PP 2                                | Toxits  | 8        | D   | 4      | 0.908     | -0.011          |
| 5587 | Naloxone benzoylethyldiazole        | Toxits  | 8        | E   | 4      | 0.649     | -0.407          |
| 5588 | SKF 81297                           | Toxits  | 8        | F   | 4      | -0.222    | 0.23            |
| 5589 | Suramin hexasodium salt             | Toxits  | 8        | G   | 4      | 0.299     | 0.277           |
| 5590 | Rimcazole                           | Toxits  | 8        | H   | 4      | -1.227    | 0.278           |
| 5591 | PD 123319                           | Toxits  | 8        | A   | 5      | -1.177    | -0.035          |
| 5592 | PMPA (NAALADase inhibitor)          | Toxits  | 8        | B   | 5      | -0.376    | 0.315           |
| 5593 | Fenretinide                         | Toxits  | 8        | C   | 5      | 0.432     | -0.159          |
| 5594 | YM 022                              | Toxits  | 8        | D   | 5      | 1.438     | -0.188          |
| 5595 | DCEBIO                              | Toxits  | 8        | E   | 5      | 0.399     | 2.899           |
| 5596 | Formoterol hemifumarate             | Toxits  | 8        | F   | 5      | 0.619     | -0.089          |
| 5597 | (-)-[3R,4S]-Chromanone 293B         | Toxits  | 8        | G   | 5      | -0.091    | 0.137           |
| 5598 | Pinacidil                           | Toxits  | 8        | H   | 5      | 0.519     | 0.215           |
| 5599 | PD 81723                            | Toxits  | 8        | A   | 6      | -0.656    | -0.085          |
| 5600 | GW 5074                             | Toxits  | 8        | B   | 6      | -0.318    | -0.196          |
| 5601 | PP 1                                | Toxits  | 8        | C   | 6      | 0.397     | 0.419           |
| 5602 | SDM25N hydrochloride                | Toxits  | 8        | D   | 6      | 0.985     | -1.313          |
| 5603 | [S]-(+)-Dimethindene maleate        | Toxits  | 8        | E   | 6      | 1.295     | -0.287          |
| 5604 | Clemastine fumarate                 | Toxits  | 8        | F   | 6      | 1.111     | -0.559          |
| 5605 | GR 127935 hydrochloride             | Toxits  | 8        | G   | 6      | 0.022     | -0.3            |
| 5606 | Milrinone                           | Toxits  | 8        | H   | 6      | 0.032     | -0.255          |
| 5607 | Colchicine                          | Toxits  | 8        | A   | 7      | -0.684    | -0.183          |
| 5608 | L-152,804                           | Toxits  | 8        | B   | 7      | 0.571     | -0.744          |
| 5609 | Kenpaullone                         | Toxits  | 8        | C   | 7      | 0.971     | -0.009          |
| 5610 | Chromanone 293B                     | Toxits  | 8        | D   | 7      | 0.638     | 0.399           |
| 5611 | PPT                                 | Toxits  | 8        | E   | 7      | 1.213     | 0.345           |
| 5612 | GYKI 52466 hydrochloride            | Toxits  | 8        | F   | 7      | 0.197     | 1.527           |
| 5613 | Mifepristone                        | Toxits  | 8        | G   | 7      | 1.379     | -0.154          |
| 5614 | Mycophenolic acid                   | Toxits  | 8        | H   | 7      | -0.184    | 0.16            |
| 5615 | ZM 39523 hydrochloride              | Toxits  | 8        | A   | 8      | -0.855    | 0.165           |
| 5616 | BML-190                             | Toxits  | 8        | B   | 8      | 0.214     | -0.263          |
| 5617 | CP 339818 hydrochloride             | Toxits  | 8        | C   | 8      | -1.121    | -0.282          |
| 5618 | NAS-181                             | Toxits  | 8        | D   | 8      | 1.773     | -2.334          |
| 5619 | Citalopram hydrobromide             | Toxits  | 8        | E   | 8      | 0.602     | -0.618          |

SUPPLEMENTARY DATA

|      | Name                       | Library | Plate No | Row | Column | ROS score | viability score |
|------|----------------------------|---------|----------|-----|--------|-----------|-----------------|
| 5820 | SU 4312                    | Tooris  | 8        | F   | 8      | 0.853     | -0.23           |
| 5821 | FIT                        | Tooris  | 8        | G   | 8      | 0.505     | -0.096          |
| 5822 | Terazosin hydrochloride    | Tooris  | 8        | H   | 8      | 0.478     | -0.831          |
| 5823 | SB 200646 hydrochloride    | Tooris  | 8        | A   | 9      | -0.908    | 0.147           |
| 5824 | MRS 1334                   | Tooris  | 8        | B   | 9      | -1.217    | 0.5             |
| 5825 | SCH 202676 hydrobromide    | Tooris  | 8        | C   | 9      | -0.528    | 1.271           |
| 5826 | Scopolamine hydrobromide   | Tooris  | 8        | D   | 9      | -0.103    | -0.448          |
| 5827 | DuP 697                    | Tooris  | 8        | E   | 9      | 0.84      | -0.536          |
| 5828 | PACOCF3                    | Tooris  | 8        | F   | 9      | -0.019    | -0.515          |
| 5829 | GR 85856                   | Tooris  | 8        | G   | 9      | 0.537     | -0.181          |
| 5830 | FR 122047                  | Tooris  | 8        | H   | 9      | -1.021    | -0.108          |
| 5831 | SB 228357                  | Tooris  | 8        | A   | 10     | -0.483    | 1.388           |
| 5832 | (-)-Cytisine               | Tooris  | 8        | B   | 10     | -1.063    | 5.399           |
| 5833 | NU 1025                    | Tooris  | 8        | C   | 10     | 0.401     | -0.284          |
| 5834 | 1400W dihydrochloride      | Tooris  | 8        | D   | 10     | 1.364     | -0.825          |
| 5835 | D609                       | Tooris  | 8        | E   | 10     | 1.584     | -0.888          |
| 5836 | Linomide                   | Tooris  | 8        | F   | 10     | 0.488     | -0.395          |
| 5837 | Oleyethanolamide           | Tooris  | 8        | G   | 10     | 0.412     | -0.248          |
| 5838 | GW 9662                    | Tooris  | 8        | H   | 10     | -0.183    | -0.133          |
| 5839 | SB 218795                  | Tooris  | 8        | A   | 11     | -0.617    | 0.121           |
| 5840 | NF 449                     | Tooris  | 8        | B   | 11     | -0.998    | 0.662           |
| 5841 | SB 203580 hydrochloride    | Tooris  | 8        | C   | 11     | -0.538    | -0.736          |
| 5842 | Homoharringtonine          | Tooris  | 8        | D   | 11     | 0.339     | -0.1            |
| 5843 | BMY 14802 hydrochloride    | Tooris  | 8        | E   | 11     | 1.949     | -3.953          |
| 5844 | Daunorubicin hydrochloride | Tooris  | 8        | F   | 11     | 0.978     | -0.945          |
| 5845 | CGP 78608                  | Tooris  | 8        | G   | 11     | -0.025    | -0.782          |
| 5846 | TMS                        | Tooris  | 8        | H   | 11     | -0.221    | 0.015           |
| 5847 | Ozagrel                    | Tooris  | 8        | A   | 2      | 0.062     | -0.123          |
| 5848 | Lovastatin                 | Tooris  | 8        | B   | 2      | -1.511    | -0.116          |
| 5849 | CD 437                     | Tooris  | 8        | C   | 2      | 2.388     | -3.808          |
| 5850 | 17-PA                      | Tooris  | 8        | D   | 2      | 2.241     | -3.122          |
| 5851 | SB 366791                  | Tooris  | 8        | E   | 2      | 0.867     | -1.117          |
| 5852 | AY 9944                    | Tooris  | 8        | F   | 2      | -0.323    | 1.37            |
| 5853 | SKF 77434                  | Tooris  | 8        | G   | 2      | 0.54      | -0.759          |
| 5854 | PTI                        | Tooris  | 8        | H   | 2      | 0.442     | 0.385           |
| 5855 | SR 55230A hydrochloride    | Tooris  | 8        | A   | 3      | -0.936    | 0.805           |
| 5856 | Icilin                     | Tooris  | 8        | B   | 3      | -0.364    | -0.132          |
| 5857 | SC 560                     | Tooris  | 8        | C   | 3      | -0.234    | 0.159           |
| 5858 | SKF 83566                  | Tooris  | 8        | D   | 3      | 0.242     | -0.012          |
| 5859 | SB 216763                  | Tooris  | 8        | E   | 3      | 1.127     | -0.351          |
| 5860 | OLDA                       | Tooris  | 8        | F   | 3      | 2.936     | 0.51            |
| 5861 | BW 373U86                  | Tooris  | 8        | G   | 3      | 0.385     | -0.045          |
| 5862 | SCH 28080                  | Tooris  | 8        | H   | 3      | 0.248     | 0.378           |
| 5863 | SB 205384                  | Tooris  | 8        | A   | 4      | -0.487    | 0.374           |
| 5864 | DCPIB                      | Tooris  | 8        | B   | 4      | 0.998     | -0.867          |
| 5865 | STO-609                    | Tooris  | 8        | C   | 4      | 0.316     | 0.953           |
| 5866 | Indatraline                | Tooris  | 8        | D   | 4      | 0.984     | 0.552           |
| 5867 | SB 415286                  | Tooris  | 8        | E   | 4      | 0.548     | -0.651          |
| 5868 | D-64131                    | Tooris  | 8        | F   | 4      | 0.599     | 0.307           |
| 5869 | GW 1929                    | Tooris  | 8        | G   | 4      | 1.527     | -1.144          |
| 5870 | NECA                       | Tooris  | 8        | H   | 4      | -0.454    | 0.843           |
| 5871 | CGP 7930                   | Tooris  | 8        | A   | 5      | -1.674    | 0.95            |
| 5872 | HA14-1                     | Tooris  | 8        | B   | 5      | -0.279    | 0.008           |
| 5873 | Piceatannol                | Tooris  | 8        | C   | 5      | 0.224     | 0.135           |
| 5874 | NBI 27914                  | Tooris  | 8        | D   | 5      | 0.685     | -0.048          |
| 5875 | Alprostadil                | Tooris  | 8        | E   | 5      | 0.318     | 0.376           |
| 5876 | Lonidamine                 | Tooris  | 8        | F   | 5      | 0.037     | -0.134          |
| 5877 | PD 102807                  | Tooris  | 8        | G   | 5      | -0.03     | 0.044           |
| 5878 | Cilostazol                 | Tooris  | 8        | H   | 5      | 1.862     | -1.114          |
| 5879 | CGP 13501                  | Tooris  | 8        | A   | 6      | -0.518    | -0.144          |
| 5880 | Splitomicin                | Tooris  | 8        | B   | 6      | -1.153    | -0.201          |
| 5881 | AG 825                     | Tooris  | 8        | C   | 6      | 0.487     | 0.094           |
| 5882 | SCH 79797                  | Tooris  | 8        | D   | 6      | 0.374     | 0.219           |
| 5883 | Streptozocin               | Tooris  | 8        | E   | 6      | 1.396     | -1.624          |
| 5884 | O-2050                     | Tooris  | 8        | F   | 6      | -0.236    | 0.026           |
| 5885 | RU 28318                   | Tooris  | 8        | G   | 6      | -0.378    | 0.471           |
| 5886 | Ibudilast                  | Tooris  | 8        | H   | 6      | 0.1       | -0.175          |
| 5887 | SDZ 21009                  | Tooris  | 8        | A   | 7      | -0.74     | 0.582           |
| 5888 | Bay K 8644, (+)-           | Tooris  | 8        | B   | 7      | -1.39     | 0.219           |
| 5889 | Tracazolate                | Tooris  | 8        | C   | 7      | 0.543     | 0.222           |
| 5890 | Ro 25-6981                 | Tooris  | 8        | D   | 7      | 0.201     | 1.477           |
| 5891 | Remacemide                 | Tooris  | 8        | E   | 7      | 0.942     | 0.3             |
| 5892 | Ginkgolide B               | Tooris  | 8        | F   | 7      | 0.818     | 0.401           |
| 5893 | RWJ 21757                  | Tooris  | 8        | G   | 7      | -0.383    | 0.515           |
| 5894 | Cisapride                  | Tooris  | 8        | H   | 7      | -0.128    | 1.072           |
| 5895 | 5-Iodo-A-85380             | Tooris  | 8        | A   | 8      | -1.194    | 1.355           |
| 5896 | Bay K 8644, R (+)-         | Tooris  | 8        | B   | 8      | -1.128    | 0.408           |
| 5897 | SNAP 5114, (S)-            | Tooris  | 8        | C   | 8      | 0.157     | -0.312          |
| 5898 | Rottlerin                  | Tooris  | 8        | D   | 8      | 0.441     | 0.195           |
| 5899 | DFB                        | Tooris  | 8        | E   | 8      | 0.681     | 1.327           |
| 5700 | GR 125487                  | Tooris  | 8        | F   | 8      | 0.221     | 0.031           |
| 5701 | LE 300                     | Tooris  | 8        | G   | 8      | 0.104     | 0.183           |
| 5702 | Noscapine                  | Tooris  | 8        | H   | 8      | -0.731    | 0.213           |
| 5703 | LY 288513                  | Tooris  | 8        | A   | 9      | -1.1      | 0.843           |
| 5704 | Bay K 8644, S(-)-          | Tooris  | 8        | B   | 9      | -0.833    | 0.04            |
| 5705 | HEMADO                     | Tooris  | 8        | C   | 9      | -0.437    | 0.122           |
| 5706 | Lamotrigine                | Tooris  | 8        | D   | 9      | 0.566     | 0.337           |
| 5707 | Y-29794                    | Tooris  | 8        | E   | 9      | 0.157     | -0.021          |
| 5708 | Fenoldopam                 | Tooris  | 8        | F   | 9      | 2.548     | -0.994          |
| 5709 | YM 90709                   | Tooris  | 8        | G   | 9      | -0.262    | 0.187           |
| 5710 | L-655240                   | Tooris  | 8        | H   | 9      | 0.155     | 2.88            |
| 5711 | Mevastatin                 | Tooris  | 8        | A   | 10     | -1.572    | 0.366           |
| 5712 | NSC 95397                  | Tooris  | 8        | B   | 10     | 0.903     | -2.862          |
| 5713 | Purvalanol A               | Tooris  | 8        | C   | 10     | -0.004    | 0.341           |
| 5714 | SB 269970                  | Tooris  | 8        | D   | 10     | 0.209     | 0.507           |
| 5715 | IEM 1460                   | Tooris  | 8        | E   | 10     | 0.856     | -0.029          |
| 5716 | Salmeterol                 | Tooris  | 8        | F   | 10     | 0.46      | -0.714          |
| 5717 | T 0156                     | Tooris  | 8        | G   | 10     | -0.031    | -0.866          |
| 5718 | CGS 15943                  | Tooris  | 8        | H   | 10     | -0.28     | 0.288           |
| 5719 | SNC 162                    | Tooris  | 8        | A   | 11     | -1.78     | 2.408           |
| 5720 | Cantharidin                | Tooris  | 8        | B   | 11     | -0.803    | -0.874          |
| 5721 | Purvalanol B               | Tooris  | 8        | C   | 11     | -0.182    | -2.143          |
| 5722 | SB 431542                  | Tooris  | 8        | D   | 11     | 0.484     | -1.088          |
| 5723 | U 18666A                   | Tooris  | 8        | E   | 11     | 0.575     | -0.843          |
| 5724 | SB 206563                  | Tooris  | 8        | F   | 11     | 0.905     | -0.883          |



SUPPLEMENTARY DATA

|      | Name                             | Library | Plate No | Row | Column | ROS score | viability score |
|------|----------------------------------|---------|----------|-----|--------|-----------|-----------------|
| 5725 | GW 7647                          | Tooris  | 9        | G   | 11     | 0.014     | 0.238           |
| 5726 | BIIE 0246                        | Tooris  | 9        | H   | 11     | -0.267    | 0.738           |
| 5727 | A 77636                          | Tooris  | 10       | A   | 2      | -0.75     | 0.104           |
| 5728 | Bay 11-7821                      | Tooris  | 10       | B   | 2      | -1.076    | -0.37           |
| 5729 | Acifran                          | Tooris  | 10       | C   | 2      | 0.119     | -0.453          |
| 5730 | NNC 63-0532                      | Tooris  | 10       | D   | 2      | 0.413     | -0.155          |
| 5731 | E-4031 dihydrochloride           | Tooris  | 10       | E   | 2      | 0.36      | 0.033           |
| 5732 | Eticlopride                      | Tooris  | 10       | F   | 2      | -0.026    | 0.024           |
| 5733 | U0124                            | Tooris  | 10       | G   | 2      | -0.147    | 0.247           |
| 5734 | Ritanserlin                      | Tooris  | 10       | H   | 2      | -0.218    | 0.834           |
| 5735 | N6-Cyclopentyladenosine          | Tooris  | 10       | A   | 3      | -0.534    | 0.491           |
| 5736 | Nemonapride                      | Tooris  | 10       | B   | 3      | -0.55     | -0.224          |
| 5737 | NNC 05-2090 hydrochloride        | Tooris  | 10       | C   | 3      | 0.097     | -0.459          |
| 5738 | Ro 26-4550                       | Tooris  | 10       | D   | 3      | -0.18     | -1.037          |
| 5739 | Altanserlin                      | Tooris  | 10       | E   | 3      | 0.007     | -0.331          |
| 5740 | EMD 65684                        | Tooris  | 10       | F   | 3      | 0.819     | -0.117          |
| 5741 | Ipsapirone                       | Tooris  | 10       | G   | 3      | 0.3       | 0.599           |
| 5742 | Bestatin                         | Tooris  | 10       | H   | 3      | 0.253     | 0.881           |
| 5743 | 2-Chloro-N6-cyclopentyladenosine | Tooris  | 10       | A   | 4      | -0.284    | 0.477           |
| 5744 | Isoproterenol                    | Tooris  | 10       | B   | 4      | -0.982    | -0.84           |
| 5745 | Zimelidine                       | Tooris  | 10       | C   | 4      | -0.089    | -0.524          |
| 5746 | Zacopride                        | Tooris  | 10       | D   | 4      | 0.487     | -0.146          |
| 5747 | Raclopride                       | Tooris  | 10       | E   | 4      | 0.798     | -0.418          |
| 5748 | Exo1                             | Tooris  | 10       | F   | 4      | 0.343     | -0.639          |
| 5749 | BTS                              | Tooris  | 10       | G   | 4      | 0.187     | 0.018           |
| 5750 | GR 79236                         | Tooris  | 10       | H   | 4      | -0.337    | 0.458           |
| 5751 | Acetaminophen                    | Tooris  | 10       | A   | 5      | -1.687    | 0.527           |
| 5752 | MG 132                           | Tooris  | 10       | B   | 5      | -1.181    | -0.638          |
| 5753 | Flurbiprofen                     | Tooris  | 10       | C   | 5      | 1.201     | -3.184          |
| 5754 | OMDM-2                           | Tooris  | 10       | D   | 5      | 0.895     | -0.234          |
| 5755 | Indirubin-3-oxime                | Tooris  | 10       | E   | 5      | 0.72      | 0.203           |
| 5756 | Ro 60-0175                       | Tooris  | 10       | F   | 5      | 0.58      | 0.856           |
| 5757 | NSC 63968                        | Tooris  | 10       | G   | 5      | 0.839     | -0.26           |
| 5758 | GR 32191                         | Tooris  | 10       | H   | 5      | 0.144     | 0.384           |
| 5759 | Sulindac                         | Tooris  | 10       | A   | 6      | -0.389    | 0.465           |
| 5760 | YC 2599 difumarate               | Tooris  | 10       | B   | 6      | -0.883    | 0.041           |
| 5761 | Dequetin                         | Tooris  | 10       | C   | 6      | -0.397    | 0.058           |
| 5762 | Gabexate                         | Tooris  | 10       | D   | 6      | 3.314     | -3.184          |
| 5763 | N-ArachidonylGABA                | Tooris  | 10       | E   | 6      | 1.208     | 0.595           |
| 5764 | L-165041                         | Tooris  | 10       | F   | 6      | 0.649     | -0.3            |
| 5765 | m-3M3FBS                         | Tooris  | 10       | G   | 6      | 0.399     | 0.375           |
| 5766 | GW 311616                        | Tooris  | 10       | H   | 6      | 0.271     | 0.276           |
| 5767 | Indomethacin                     | Tooris  | 10       | A   | 7      | -0.046    | 0.896           |
| 5768 | ALX 5407                         | Tooris  | 10       | B   | 7      | -1.068    | -0.59           |
| 5769 | S 14506                          | Tooris  | 10       | C   | 7      | 0.385     | -0.515          |
| 5770 | WAY 161503                       | Tooris  | 10       | D   | 7      | 0.322     | -0.455          |
| 5771 | ICI 63197                        | Tooris  | 10       | E   | 7      | 0.362     | 0.283           |
| 5772 | Impentamine 2HBr                 | Tooris  | 10       | F   | 7      | 0.619     | 0.11            |
| 5773 | o-3M3FBS                         | Tooris  | 10       | G   | 7      | 0.482     | 0.276           |
| 5774 | SB 334867                        | Tooris  | 10       | H   | 7      | 0.453     | 0.195           |
| 5775 | CL 218872                        | Tooris  | 10       | A   | 8      | -0.781    | 5.714           |
| 5776 | PETCM                            | Tooris  | 10       | B   | 8      | -0.973    | -0.436          |
| 5777 | Urapidil                         | Tooris  | 10       | C   | 8      | -0.345    | -0.295          |
| 5778 | ITE                              | Tooris  | 10       | D   | 8      | 0.782     | -0.449          |
| 5779 | Demethylasterriquinone B1        | Tooris  | 10       | E   | 8      | -0.065    | 0.672           |
| 5780 | Eitoprazine                      | Tooris  | 10       | F   | 8      | 1.488     | -0.813          |
| 5781 | Loratidine                       | Tooris  | 10       | G   | 8      | 0.274     | 0.398           |
| 5782 | SB 258585                        | Tooris  | 10       | H   | 8      | 0.628     | 0.598           |
| 5783 | CV 1808                          | Tooris  | 10       | A   | 9      | -0.607    | 0.98            |
| 5784 | Nlutamide                        | Tooris  | 10       | B   | 9      | 0.215     | -0.54           |
| 5785 | Arctigenin                       | Tooris  | 10       | C   | 9      | 0.363     | -0.156          |
| 5786 | SR 2640                          | Tooris  | 10       | D   | 9      | 2.284     | -0.772          |
| 5787 | YM 976                           | Tooris  | 10       | E   | 9      | 0.556     | 0.623           |
| 5788 | PRIMA-1                          | Tooris  | 10       | F   | 9      | 0.376     | 0.4             |
| 5789 | L-670596                         | Tooris  | 10       | G   | 9      | 0.083     | 0.381           |
| 5790 | SB 239063                        | Tooris  | 10       | H   | 9      | 0.143     | 0.941           |
| 5791 | R-96544                          | Tooris  | 10       | A   | 10     | 0.427     | 1.504           |
| 5792 | Blebbistatin, (+)-               | Tooris  | 10       | B   | 10     | -0.786    | -0.802          |
| 5793 | Ro 106-9920                      | Tooris  | 10       | C   | 10     | 0.177     | -1.039          |
| 5794 | SR 33805                         | Tooris  | 10       | D   | 10     | 0.487     | -0.877          |
| 5795 | IRL 2500                         | Tooris  | 10       | E   | 10     | 1.025     | -0.853          |
| 5796 | MRS 1845                         | Tooris  | 10       | F   | 10     | 0.129     | -0.404          |
| 5797 | DCB                              | Tooris  | 10       | G   | 10     | -0.416    | -0.315          |
| 5798 | SB 408124                        | Tooris  | 10       | H   | 10     | 0.592     | 0.047           |
| 5799 | Bay 11-7085                      | Tooris  | 10       | A   | 11     | -1.202    | 2.037           |
| 5800 | Balcalcin                        | Tooris  | 10       | B   | 11     | -0.889    | -0.228          |
| 5801 | NNC 711                          | Tooris  | 10       | C   | 11     | 0.17      | -0.808          |
| 5802 | 2-Methoxyestradiol               | Tooris  | 10       | D   | 11     | 1.184     | -0.999          |
| 5803 | RHC 80267                        | Tooris  | 10       | E   | 11     | 0.82      | -0.401          |
| 5804 | NSC 663284                       | Tooris  | 10       | F   | 11     | 0.145     | -0.129          |
| 5805 | DMeOB                            | Tooris  | 10       | G   | 11     | 0.09      | -0.051          |
| 5806 | Gossypol                         | Tooris  | 10       | H   | 11     | 0.232     | -0.006          |
| 5807 | Simvastatin                      | Tooris  | 11       | A   | 2      | -0.982    | 0.832           |
| 5808 | THC, (R,R)-                      | Tooris  | 11       | B   | 2      | 1.321     | -2.916          |
| 5809 | Ro 04-5595                       | Tooris  | 11       | C   | 2      | -0.058    | 1.55            |
| 5810 | PSB 36                           | Tooris  | 11       | D   | 2      | 0.752     | -0.821          |
| 5811 | SKF 83959                        | Tooris  | 11       | E   | 2      | 0.971     | -1.237          |
| 5812 | DAU 5884                         | Tooris  | 11       | F   | 2      | 0.417     | -0.482          |
| 5813 | nTZDpa                           | Tooris  | 11       | G   | 2      | -0.036    | 0.045           |
| 5814 | WAY 629                          | Tooris  | 11       | H   | 2      | 0.049     | 0.045           |
| 5815 | Ranitidine                       | Tooris  | 11       | A   | 3      | -0.519    | 0.594           |
| 5816 | ZK 93423                         | Tooris  | 11       | B   | 3      | -0.338    | -0.119          |
| 5817 | Paxilline                        | Tooris  | 11       | C   | 3      | 1.706     | -1.393          |
| 5818 | Ch 55                            | Tooris  | 11       | D   | 3      | 0.456     | 0.17            |
| 5819 | Y-26763                          | Tooris  | 11       | E   | 3      | 0.707     | 0.054           |
| 5820 | SKQ II                           | Tooris  | 11       | F   | 3      | 0.601     | -0.202          |
| 5821 | API-2                            | Tooris  | 11       | G   | 3      | 0.443     | 0.788           |
| 5822 | Tetrabenazine                    | Tooris  | 11       | H   | 3      | 0.059     | -0.592          |
| 5823 | SL 327                           | Tooris  | 11       | A   | 4      | -0.857    | 0.755           |
| 5824 | Ro 19-4603                       | Tooris  | 11       | B   | 4      | -0.458    | -0.477          |
| 5825 | Fluticasone propionate           | Tooris  | 11       | C   | 4      | 0.384     | -0.604          |
| 5826 | LE 135                           | Tooris  | 11       | D   | 4      | 0.871     | -1.461          |
| 5827 | Y-27152                          | Tooris  | 11       | E   | 4      | 1.013     | -1.084          |
| 5828 | Apoptosis Activator 2            | Tooris  | 11       | F   | 4      | 0.602     | 0.159           |
| 5829 | NSC 625987                       | Tooris  | 11       | G   | 4      | 0.043     | 0.468           |

SUPPLEMENTARY DATA

|      | Name                      | Library | Plate No | Row | Column | ROS score | viability score |
|------|---------------------------|---------|----------|-----|--------|-----------|-----------------|
| 5830 | BVT 948                   | Tooris  | 11       | H   | 4      | 0.27      | 0.989           |
| 5831 | Norketamine               | Tooris  | 11       | A   | 5      | -0.702    | 2.301           |
| 5832 | ZK 93426                  | Tooris  | 11       | B   | 5      | -0.876    | 0.092           |
| 5833 | SKF 86002                 | Tooris  | 11       | C   | 5      | 0.4       | 1.703           |
| 5834 | SR 202                    | Tooris  | 11       | D   | 5      | 0.591     | -0.742          |
| 5835 | UBP 296                   | Tooris  | 11       | E   | 5      | 0.4       | -0.572          |
| 5836 | Amisulpride               | Tooris  | 11       | F   | 5      | 0.354     | 0.136           |
| 5837 | ZD 2079                   | Tooris  | 11       | G   | 5      | 0.14      | -0.192          |
| 5838 | ZK 164015                 | Tooris  | 11       | H   | 5      | -0.244    | 0.368           |
| 5839 | Anabasine hydrochloride   | Tooris  | 11       | A   | 6      | -0.981    | 1.898           |
| 5840 | Ro 15-4513                | Tooris  | 11       | B   | 6      | -0.787    | 0.292           |
| 5841 | PSB 1115                  | Tooris  | 11       | C   | 6      | 0.35      | -0.758          |
| 5842 | Medetomidine              | Tooris  | 11       | D   | 6      | 0.193     | -0.446          |
| 5843 | UBP 302                   | Tooris  | 11       | E   | 6      | 0.304     | 0.13            |
| 5844 | 2,3-DCPE                  | Tooris  | 11       | F   | 6      | 0.673     | 0.088           |
| 5845 | NTNCB hydrochloride       | Tooris  | 11       | G   | 6      | 0.369     | 0.81            |
| 5846 | SN-6                      | Tooris  | 11       | H   | 6      | -0.157    | 0.948           |
| 5847 | Tianeptine                | Tooris  | 11       | A   | 7      | -0.234    | 1.462           |
| 5848 | Linopirdine               | Tooris  | 11       | B   | 7      | -0.578    | -0.282          |
| 5849 | MRS 1754                  | Tooris  | 11       | C   | 7      | 0.108     | -0.63           |
| 5850 | Cinalukast                | Tooris  | 11       | D   | 7      | -1        | -0.223          |
| 5851 | Galnon                    | Tooris  | 11       | E   | 7      | 1.273     | -0.547          |
| 5852 | Leelamine                 | Tooris  | 11       | F   | 7      | 0.458     | -0.733          |
| 5853 | Embelin                   | Tooris  | 11       | G   | 7      | 0.571     | -0.282          |
| 5854 | CFPD1                     | Tooris  | 11       | H   | 7      | 0.411     | 0.439           |
| 5855 | SANT-1                    | Tooris  | 11       | A   | 8      | 0.098     | -0.158          |
| 5856 | XE 991                    | Tooris  | 11       | B   | 8      | -0.825    | -0.105          |
| 5857 | Tomoxetine hydrochloride  | Tooris  | 11       | C   | 8      | 0.388     | -0.353          |
| 5858 | SDZ 205-567               | Tooris  | 11       | D   | 8      | 0.538     | -1.187          |
| 5859 | GTP 14564                 | Tooris  | 11       | E   | 8      | 1.328     | -0.694          |
| 5860 | Paroxetine maleate        | Tooris  | 11       | F   | 8      | -0.135    | 0.952           |
| 5861 | Bax channel blocker       | Tooris  | 11       | G   | 8      | 0.783     | 0.491           |
| 5862 | SR 27897                  | Tooris  | 11       | H   | 8      | 0.045     | 0.043           |
| 5863 | 6-Iodonordihydrocapsaicin | Tooris  | 11       | A   | 9      | -0.432    | 1.281           |
| 5864 | GS 39783                  | Tooris  | 11       | B   | 9      | -0.883    | 0.856           |
| 5865 | PSB 11                    | Tooris  | 11       | C   | 9      | -0.887    | 0.844           |
| 5866 | CI 898 trihydrochloride   | Tooris  | 11       | D   | 9      | 0.681     | -0.441          |
| 5867 | DMNB                      | Tooris  | 11       | E   | 9      | 1.1       | -3.818          |
| 5868 | SCS                       | Tooris  | 11       | F   | 9      | 0.228     | 0.024           |
| 5869 | NISC 23768                | Tooris  | 11       | G   | 9      | -0.281    | 0.838           |
| 5870 | S-Trityl-L-cysteine       | Tooris  | 11       | H   | 9      | -0.451    | 1.544           |
| 5871 | L-803,067                 | Tooris  | 11       | A   | 10     | -0.845    | 0.953           |
| 5872 | Ro 31-8220                | Tooris  | 11       | B   | 10     | -1.162    | 0.449           |
| 5873 | Guggulsterone             | Tooris  | 11       | C   | 10     | -0.061    | -2.416          |
| 5874 | Aminopurvalanol A         | Tooris  | 11       | D   | 10     | 0.522     | -0.335          |
| 5875 | RS 102895                 | Tooris  | 11       | E   | 10     | 0.432     | -0.947          |
| 5876 | Nicorandil                | Tooris  | 11       | F   | 10     | -0.048    | 0.189           |
| 5877 | INCA-6                    | Tooris  | 11       | G   | 10     | 0.233     | 0.733           |
| 5878 | 4-HQN                     | Tooris  | 11       | H   | 10     | -1.162    | 1.425           |
| 5879 | Reboxetine                | Tooris  | 11       | A   | 11     | -1.062    | 1.717           |
| 5880 | Isradipine                | Tooris  | 11       | B   | 11     | -0.229    | 0.137           |
| 5881 | Mirtazepine               | Tooris  | 11       | C   | 11     | -0.94     | -0.711          |
| 5882 | Apomorphine               | Tooris  | 11       | D   | 11     | 0.074     | -0.934          |
| 5883 | PNU 37883 hydrochloride   | Tooris  | 11       | E   | 11     | -0.296    | -0.363          |
| 5884 | McN 9652, (+/-)           | Tooris  | 11       | F   | 11     | 0.304     | -0.8            |
| 5885 | AZ 10417808               | Tooris  | 11       | G   | 11     | -0.192    | 0.279           |
| 5886 | Carmoxirole               | Tooris  | 11       | H   | 11     | -0.503    | 0.803           |
| 5887 | R 99-022                  | Tooris  | 12       | A   | 2      | -1.323    | 0.377           |
| 5888 | LY 255283                 | Tooris  | 12       | B   | 2      | -0.886    | -0.232          |
| 5889 | Octopamine hydrochloride  | Tooris  | 12       | C   | 2      | 0.017     | 0.231           |
| 5890 | Ro 08-2750                | Tooris  | 12       | D   | 2      | 0.761     | 0.396           |
| 5891 | AQ-RA 741                 | Tooris  | 12       | E   | 2      | 0.457     | -0.037          |
| 5892 | SR 142948                 | Tooris  | 12       | F   | 2      | 0.534     | -0.058          |
| 5893 | Necrostatin-1             | Tooris  | 12       | G   | 2      | 0.188     | 0.047           |
| 5894 | Salubrinol                | Tooris  | 12       | H   | 2      | -0.29     | 0.586           |
| 5895 | Eliprodil                 | Tooris  | 12       | A   | 3      | -0.942    | 1.918           |
| 5896 | N20C hydrochloride        | Tooris  | 12       | B   | 3      | -0.382    | -0.34           |
| 5897 | Cisplatin                 | Tooris  | 12       | C   | 3      | -0.08     | 0.199           |
| 5898 | TBB                       | Tooris  | 12       | D   | 3      | 0.567     | 0.445           |
| 5899 | Zebularine                | Tooris  | 12       | E   | 3      | 0.379     | 0.273           |
| 5900 | SR 49059                  | Tooris  | 12       | F   | 3      | 0.423     | 0.005           |
| 5901 | WIN 55212-3               | Tooris  | 12       | G   | 3      | 0.286     | -0.349          |
| 5902 | Gavestinel                | Tooris  | 12       | H   | 3      | 0.157     | 0.122           |
| 5903 | 3-MATIDA                  | Tooris  | 12       | A   | 4      | -0.516    | -0.166          |
| 5904 | ABT 724 trihydrochloride  | Tooris  | 12       | B   | 4      | -0.322    | 0.289           |
| 5905 | Doxorubicin hydrochloride | Tooris  | 12       | C   | 4      | 0.158     | 0.173           |
| 5906 | FPL 55712                 | Tooris  | 12       | D   | 4      | 4.167     | -4.967          |
| 5907 | Cordycepin                | Tooris  | 12       | E   | 4      | 0.411     | 0.182           |
| 5908 | L-168049                  | Tooris  | 12       | F   | 4      | 0.465     | -0.118          |
| 5909 | Ro 10-5824                | Tooris  | 12       | G   | 4      | 1.062     | 4.539           |
| 5910 | ABT 702 2HCl              | Tooris  | 12       | H   | 4      | 0.275     | -0.174          |
| 5911 | L-755507                  | Tooris  | 12       | A   | 5      | -0.945    | 0.181           |
| 5912 | CI 976                    | Tooris  | 12       | B   | 5      | -0.076    | 0.343           |
| 5913 | ACDPP                     | Tooris  | 12       | C   | 5      | -0.139    | 0.272           |
| 5914 | Raloxifene hydrochloride  | Tooris  | 12       | D   | 5      | 0.509     | -0.097          |
| 5915 | Cloprostenol sodium salt  | Tooris  | 12       | E   | 5      | 1.044     | -0.254          |
| 5916 | DNQX disodium salt        | Tooris  | 12       | F   | 5      | 0.512     | -0.035          |
| 5917 | DMP 543                   | Tooris  | 12       | G   | 5      | -0.232    | -0.13           |
| 5918 | T 0901317                 | Tooris  | 12       | H   | 5      | 0.527     | 0.032           |
| 5919 | Mibefradil                | Tooris  | 12       | A   | 6      | -0.889    | 0.36            |
| 5920 | Leflunomide               | Tooris  | 12       | B   | 6      | -0.875    | 0.06            |
| 5921 | CGS 9343B                 | Tooris  | 12       | C   | 6      | 1.11      | 0.037           |
| 5922 | 2'-MeCCPA                 | Tooris  | 12       | D   | 6      | 0.948     | -0.496          |
| 5923 | Prostaglandin E2          | Tooris  | 12       | E   | 6      | 0.145     | -0.361          |
| 5924 | QX 314 chloride           | Tooris  | 12       | F   | 6      | 0.798     | -0.781          |
| 5925 | JNJ 16259685              | Tooris  | 12       | G   | 6      | 0.561     | -0.494          |
| 5926 | GW 405833                 | Tooris  | 12       | H   | 6      | 0.47      | -0.27           |
| 5927 | CGP 71683 hydrochloride   | Tooris  | 12       | A   | 7      | -0.763    | -0.211          |
| 5928 | GW 0742                   | Tooris  | 12       | B   | 7      | 0.281     | -0.114          |
| 5929 | L-692585                  | Tooris  | 12       | C   | 7      | 0.396     | 0.497           |
| 5930 | Moxonidine hydrochloride  | Tooris  | 12       | D   | 7      | 0.732     | -0.029          |
| 5931 | SCH 39166                 | Tooris  | 12       | E   | 7      | 0.649     | -0.284          |
| 5932 | LOE 908                   | Tooris  | 12       | F   | 7      | 1.092     | -0.039          |
| 5933 | Treguinsin                | Tooris  | 12       | G   | 7      | 0.725     | -0.295          |
| 5934 | EMD 386088                | Tooris  | 12       | H   | 7      | -0.105    | 0.278           |

SUPPLEMENTARY DATA

|      | Name                             | Library | Plate No | Row | Column | ROS score | viability score |
|------|----------------------------------|---------|----------|-----|--------|-----------|-----------------|
| 5935 | PD 160170                        | Toosis  | 12       | A   | 8      | -0.536    | 0.38            |
| 5936 | BRL 50481                        | Toosis  | 12       | B   | 8      | -0.553    | 0.298           |
| 5937 | DY131                            | Toosis  | 12       | C   | 8      | 0.312     | -0.086          |
| 5938 | SEW 2871                         | Toosis  | 12       | D   | 8      | 0.711     | -0.943          |
| 5939 | T0070907                         | Toosis  | 12       | E   | 8      | 0.802     | 0.366           |
| 5940 | Immethridine                     | Toosis  | 12       | F   | 8      | 0.386     | -0.053          |
| 5941 | WEB 2086                         | Toosis  | 12       | G   | 8      | 0.143     | -0.216          |
| 5942 | AMN 082                          | Toosis  | 12       | H   | 8      | 0.109     | 0               |
| 5943 | PNU 22394 hydrochloride          | Toosis  | 12       | A   | 9      | -0.307    | -0.25           |
| 5944 | GW 441756                        | Toosis  | 12       | B   | 9      | -0.183    | -0.11           |
| 5945 | NNC 55-0396                      | Toosis  | 12       | C   | 9      | -0.059    | 0.582           |
| 5946 | O-1918                           | Toosis  | 12       | D   | 9      | -0.009    | -0.634          |
| 5947 | PNU 282987                       | Toosis  | 12       | E   | 9      | 0.589     | -0.183          |
| 5948 | AMG 9810                         | Toosis  | 12       | F   | 9      | 0.798     | -0.392          |
| 5949 | 4-Methylhistamine                | Toosis  | 12       | G   | 9      | 1.211     | 0.551           |
| 5950 | Fenobam                          | Toosis  | 12       | H   | 9      | 0.022     | -0.26           |
| 5951 | Zatebradine hydrochloride        | Toosis  | 12       | A   | 10     | 0.142     | 0.038           |
| 5952 | GW 583340 dihydrochloride        | Toosis  | 12       | B   | 10     | -0.15     | 0.038           |
| 5953 | SCH 58261                        | Toosis  | 12       | C   | 10     | 0.116     | 4.494           |
| 5954 | Lamotrigine isethionate          | Toosis  | 12       | D   | 10     | 0.183     | 0.642           |
| 5955 | Devazepide                       | Toosis  | 12       | E   | 10     | 0.531     | -0.786          |
| 5956 | Pravastatin                      | Toosis  | 12       | F   | 10     | 0.351     | -0.272          |
| 5957 | CGH 2466                         | Toosis  | 12       | G   | 10     | 0.454     | -0.704          |
| 5958 | LY 320135                        | Toosis  | 12       | H   | 10     | -0.721    | -0.325          |
| 5959 | PALDA                            | Toosis  | 12       | A   | 11     | -0.703    | 0.019           |
| 5960 | DMAB-anabaseine                  | Toosis  | 12       | B   | 11     | -0.404    | -0.246          |
| 5961 | GW 6471                          | Toosis  | 12       | C   | 11     | -0.426    | -0.071          |
| 5962 | 1,2,3,4,5,6-Hexabromocyclohexane | Toosis  | 12       | D   | 11     | 0.42      | -0.534          |
| 5963 | Tabimorelin                      | Toosis  | 12       | E   | 11     | 0.167     | -0.582          |
| 5964 | BTS 54-505                       | Toosis  | 12       | F   | 11     | 0.63      | -0.607          |
| 5965 | ZK 200775                        | Toosis  | 12       | G   | 11     | -0.131    | -0.414          |
| 5966 | MFMO                             | Toosis  | 12       | H   | 11     | -0.197    | -0.216          |
| 5967 | JTE 013                          | Toosis  | 13       | A   | 2      | -0.654    | -0.344          |
| 5968 | HA 1100                          | Toosis  | 13       | B   | 2      | 0.344     | -0.342          |
| 5969 | JNJ 10191584                     | Toosis  | 13       | C   | 2      | -0.009    | -0.586          |
| 5970 | Tropisetron                      | Toosis  | 13       | D   | 2      | 0.432     | 0.172           |
| 5971 | GW 3865                          | Toosis  | 13       | E   | 2      | 0.727     | 0.208           |
| 5972 | Xaliproden                       | Toosis  | 13       | F   | 2      | -0.279    | -0.785          |
| 5973 | Biscuculline methiodide, (-)     | Toosis  | 13       | G   | 2      | -0.778    | -0.453          |
| 5974 | PD 168793                        | Toosis  | 13       | H   | 2      | -0.321    | 0.286           |
| 5975 | SDZ NKT 343                      | Toosis  | 13       | A   | 3      | 0.213     | 1.732           |
| 5976 | BIBX 1382                        | Toosis  | 13       | B   | 3      | -0.386    | 0.44            |
| 5977 | CGP 63353                        | Toosis  | 13       | C   | 3      | 0.801     | 1.18            |
| 5978 | Lazabemide                       | Toosis  | 13       | D   | 3      | 1.036     | -0.451          |
| 5979 | ZM 323881                        | Toosis  | 13       | E   | 3      | 0.403     | -0.257          |
| 5980 | MNITMT                           | Toosis  | 13       | F   | 3      | 0.27      | 0.025           |
| 5981 | Irsogladine                      | Toosis  | 13       | G   | 3      | -0.335    | -0.174          |
| 5982 | NSC 3852                         | Toosis  | 13       | H   | 3      | -0.689    | 1.218           |
| 5983 | Sertraline                       | Toosis  | 13       | A   | 4      | -0.874    | 1.344           |
| 5984 | BIBU 1361                        | Toosis  | 13       | B   | 4      | -0.15     | 1.033           |
| 5985 | RITA                             | Toosis  | 13       | C   | 4      | 0.888     | -0.41           |
| 5986 | SCH 442416                       | Toosis  | 13       | D   | 4      | 0.214     | 0.355           |
| 5987 | SR 11302                         | Toosis  | 13       | E   | 4      | 0.21      | -0.784          |
| 5988 | VUF 5681 dihydrobromide          | Toosis  | 13       | F   | 4      | 1.055     | -0.843          |
| 5989 | SSR 69071                        | Toosis  | 13       | G   | 4      | -0.187    | 0.131           |
| 5990 | A 205804                         | Toosis  | 13       | H   | 4      | -0.798    | 0.338           |
| 5991 | Glimepiride                      | Toosis  | 13       | A   | 5      | 0.184     | 0.828           |
| 5992 | LY 303511                        | Toosis  | 13       | B   | 5      | -0.258    | 0.25            |
| 5993 | Desmethyl-YM 296198              | Toosis  | 13       | C   | 5      | -0.016    | 0.966           |
| 5994 | SDZ WAG 934                      | Toosis  | 13       | D   | 5      | 0.585     | -0.855          |
| 5995 | Proxyfan                         | Toosis  | 13       | E   | 5      | -0.282    | -0.482          |
| 5996 | VUF 8430 dihydrobromide          | Toosis  | 13       | F   | 5      | 0.149     | 0.745           |
| 5997 | J 104129                         | Toosis  | 13       | G   | 5      | -0.124    | 0.982           |
| 5998 | Ganaxolone                       | Toosis  | 13       | H   | 5      | -1.126    | 0.598           |
| 5999 | Eplerenone                       | Toosis  | 13       | A   | 6      | -0.476    | 0.575           |
| 8000 | Scriptaid                        | Toosis  | 13       | B   | 6      | 1.225     | -1.896          |
| 8001 | YM 298198                        | Toosis  | 13       | C   | 6      | 0.241     | 0.742           |
| 8002 | UK 14,304 tartrate               | Toosis  | 13       | D   | 6      | 1.281     | -0.548          |
| 8003 | 2-Pyrrolylethylamine             | Toosis  | 13       | E   | 6      | 0.249     | -0.812          |
| 8004 | Melperone hydrochloride          | Toosis  | 13       | F   | 6      | 0.774     | 0.035           |
| 8005 | Trap 101                         | Toosis  | 13       | G   | 6      | 0.13      | 0.044           |
| 8006 | DPO-1                            | Toosis  | 13       | H   | 6      | -0.042    | 0.407           |
| 8007 | FK 888                           | Toosis  | 13       | A   | 7      | 0.011     | 1.081           |
| 8008 | Fexofenadine HCl                 | Toosis  | 13       | B   | 7      | -0.009    | -0.479          |
| 8009 | LY 344864                        | Toosis  | 13       | C   | 7      | 0.936     | -0.88           |
| 8010 | CGS 20625                        | Toosis  | 13       | D   | 7      | 0.541     | -0.717          |
| 8011 | JTE 907                          | Toosis  | 13       | E   | 7      | 0.291     | 1.07            |
| 8012 | DR 2313                          | Toosis  | 13       | F   | 7      | 0.539     | 0.201           |
| 8013 | Talniflumate                     | Toosis  | 13       | G   | 7      | 0.079     | 0.67            |
| 8014 | Domperidone                      | Toosis  | 13       | H   | 7      | -0.445    | 0.351           |
| 8015 | MRS 3777                         | Toosis  | 13       | A   | 8      | 0.226     | 0.757           |
| 8016 | CCT 018159                       | Toosis  | 13       | B   | 8      | 0.244     | -0.17           |
| 8017 | LY 2183240                       | Toosis  | 13       | C   | 8      | 0.757     | -0.997          |
| 8018 | IBC 293                          | Toosis  | 13       | D   | 8      | 0.377     | -1.448          |
| 8019 | JTC 801                          | Toosis  | 13       | E   | 8      | 1.436     | -0.717          |
| 8020 | PNU 120596                       | Toosis  | 13       | F   | 8      | 0.422     | -0.215          |
| 8021 | Acyclovir                        | Toosis  | 13       | G   | 8      | -0.759    | 0.239           |
| 8022 | IKK 16                           | Toosis  | 13       | H   | 8      | -1.281    | 1.611           |
| 8023 | Ambroxol                         | Toosis  | 13       | A   | 9      | -0.361    | 0.02            |
| 8024 | AC 55649                         | Toosis  | 13       | B   | 9      | 1.517     | -0.962          |
| 8025 | Co 101244 HCl                    | Toosis  | 13       | C   | 9      | 0.7       | -1.148          |
| 8026 | Nimesulide                       | Toosis  | 13       | D   | 9      | 0.604     | -1.45           |
| 8027 | Costunolide                      | Toosis  | 13       | E   | 9      | 0.927     | -0.961          |
| 8028 | ZM 306416                        | Toosis  | 13       | F   | 9      | 0.751     | -1.655          |
| 8029 | L-161,982                        | Toosis  | 13       | G   | 9      | 0.405     | -0.701          |
| 8030 | Ki 8751                          | Toosis  | 13       | H   | 9      | -1.247    | 1.227           |
| 8031 | Ro 90-7501                       | Toosis  | 13       | A   | 10     | -0.437    | 0.433           |
| 8032 | TMPH hydrochloride               | Toosis  | 13       | B   | 10     | 0.199     | -1.061          |
| 8033 | Arcynollavin A                   | Toosis  | 13       | C   | 10     | 0.423     | 3.856           |
| 8034 | ER 27319                         | Toosis  | 13       | D   | 10     | 0.929     | -2.326          |
| 8035 | AC 7954, (+)                     | Toosis  | 13       | E   | 10     | 0.662     | -0.903          |
| 8036 | Bay 59-3074                      | Toosis  | 13       | F   | 10     | 0.137     | -0.66           |
| 8037 | RS 504393                        | Toosis  | 13       | G   | 10     | 0.173     | 0.205           |
| 8038 | Lofepramine                      | Toosis  | 13       | H   | 10     | -1.293    | 0.959           |
| 8039 | B-HT 920                         | Toosis  | 13       | A   | 11     | -0.107    | -0.477          |

SUPPLEMENTARY DATA

|      | Name                                                                   | Library | Plate No | Row | Column | ROS score | viability score |
|------|------------------------------------------------------------------------|---------|----------|-----|--------|-----------|-----------------|
| 8040 | NNC 26-9100                                                            | Toots   | 13       | B   | 11     | 0.261     | -1.523          |
| 8041 | ZM 447439                                                              | Toots   | 13       | C   | 11     | 0.06      | -1.627          |
| 8042 | GW 4064                                                                | Toots   | 13       | D   | 11     | 0.378     | 1.018           |
| 8043 | Clopidogrel (+/-)                                                      | Toots   | 13       | E   | 11     | 0.228     | -0.89           |
| 8044 | Bay 36-7620                                                            | Toots   | 13       | F   | 11     | -0.028    | -0.883          |
| 8045 | T 98475                                                                | Toots   | 13       | G   | 11     | -0.063    | 1.171           |
| 8046 | 6-Hydroxydopamine                                                      | Toots   | 13       | H   | 11     | -1.054    | 0.756           |
| 8047 | SUN 9 8155                                                             | Toots   | 14       | A   | 2      | -0.822    | 0.649           |
| 8048 | PSB 06126                                                              | Toots   | 14       | B   | 2      | 0.411     | 0.318           |
| 8049 | TCB-2                                                                  | Toots   | 14       | C   | 2      | 0.402     | 0.973           |
| 8050 | Carboplatin                                                            | Toots   | 14       | D   | 2      | 0.306     | -0.041          |
| 8051 | Co 102882                                                              | Toots   | 14       | E   | 2      | -0.042    | -0.115          |
| 8052 | UCL 2077                                                               | Toots   | 14       | F   | 2      | -0.183    | -0.357          |
| 8053 | JLK 6                                                                  | Toots   | 14       | G   | 2      | -0.8      | 0.477           |
| 8054 | Calcipotriol                                                           | Toots   | 14       | H   | 2      | -1.497    | 0.589           |
| 8055 | CD 1530                                                                | Toots   | 14       | A   | 3      | 0.255     | 0.819           |
| 8056 | Cetizine                                                               | Toots   | 14       | B   | 3      | -0.087    | -0.09           |
| 8057 | Mexiletine                                                             | Toots   | 14       | C   | 3      | 0.026     | 0.224           |
| 8058 | Cilnidipine                                                            | Toots   | 14       | D   | 3      | 0.619     | 1.77            |
| 8059 | Fananserin                                                             | Toots   | 14       | E   | 3      | -0.127    | -0.324          |
| 8060 | PHTPP                                                                  | Toots   | 14       | F   | 3      | 0.041     | 0.499           |
| 8061 | GF 2a                                                                  | Toots   | 14       | G   | 3      | -0.468    | 1.089           |
| 8062 | Temozolomide                                                           | Toots   | 14       | H   | 3      | -1.21     | 0.499           |
| 8063 | 10-DEBC                                                                | Toots   | 14       | A   | 4      | -1.227    | 0.198           |
| 8064 | Benazepril                                                             | Toots   | 14       | B   | 4      | 0.112     | 0.087           |
| 8065 | Clofarabine                                                            | Toots   | 14       | C   | 4      | 1.376     | -2.292          |
| 8066 | CL 82198                                                               | Toots   | 14       | D   | 4      | 0.594     | -0.033          |
| 8067 | NSC 632839                                                             | Toots   | 14       | E   | 4      | 0.333     | -0.283          |
| 8068 | Cabergoline                                                            | Toots   | 14       | F   | 4      | 0.503     | -0.152          |
| 8069 | 4-Phenylbutyrate, sodium                                               | Toots   | 14       | G   | 4      | -0.181    | 0.746           |
| 8070 | Cilastatin                                                             | Toots   | 14       | H   | 4      | -1.321    | 0.488           |
| 8071 | TPCA-1                                                                 | Toots   | 14       | A   | 5      | -0.228    | 1.241           |
| 8072 | Zamifenacin                                                            | Toots   | 14       | B   | 5      | 0.688     | 0.328           |
| 8073 | PD 198306                                                              | Toots   | 14       | C   | 5      | 0.724     | -0.429          |
| 8074 | WAY 170523                                                             | Toots   | 14       | D   | 5      | 0.211     | 0.775           |
| 8075 | GW 9508                                                                | Toots   | 14       | E   | 5      | 0.52      | -0.999          |
| 8076 | BMS 191011                                                             | Toots   | 14       | F   | 5      | 0.27      | -0.317          |
| 8077 | SN 38                                                                  | Toots   | 14       | G   | 5      | 0.417     | -1.002          |
| 8078 | LY 364947                                                              | Toots   | 14       | H   | 5      | -0.376    | 0.135           |
| 8079 | SB 218078                                                              | Toots   | 14       | A   | 6      | -0.588    | 1.01            |
| 8080 | Tenidap                                                                | Toots   | 14       | B   | 6      | 0.634     | 0.373           |
| 8081 | Ryuvidine                                                              | Toots   | 14       | C   | 6      | 0.059     | -1.575          |
| 8082 | DAPT                                                                   | Toots   | 14       | D   | 6      | 0.751     | 0.832           |
| 8083 | AEQ 3482                                                               | Toots   | 14       | E   | 6      | 0.122     | -0.537          |
| 8084 | GP 1a                                                                  | Toots   | 14       | F   | 6      | 0.067     | 0.771           |
| 8085 | Carvedilol                                                             | Toots   | 14       | G   | 6      | -0.998    | 0.699           |
| 8086 | SB 225002                                                              | Toots   | 14       | H   | 6      | -0.908    | 1.122           |
| 8087 | Calmidazolium chloride                                                 | Toots   | 14       | A   | 7      | -0.475    | 0.178           |
| 8088 | PAC 1                                                                  | Toots   | 14       | B   | 7      | 0.709     | -0.105          |
| 8089 | IMD 0354                                                               | Toots   | 14       | C   | 7      | 2.968     | -4.421          |
| 8090 | NGB 2904                                                               | Toots   | 14       | D   | 7      | 0.65      | 0.205           |
| 8091 | WAY 213613                                                             | Toots   | 14       | E   | 7      | 0.493     | -0.412          |
| 8092 | Artemisinin                                                            | Toots   | 14       | F   | 7      | 0.759     | -0.401          |
| 8093 | Pentylentetrazole                                                      | Toots   | 14       | G   | 7      | -0.222    | 0.221           |
| 8094 | CGP 57380                                                              | Toots   | 14       | H   | 7      | -1.04     | 0.174           |
| 8095 | Fexaramine                                                             | Toots   | 14       | A   | 8      | 0.162     | 0.284           |
| 8096 | Lansoprazole                                                           | Toots   | 14       | B   | 8      | 0.19      | 0.427           |
| 8097 | PD 158780                                                              | Toots   | 14       | C   | 8      | 1.047     | -2.895          |
| 8098 | Ivachtin                                                               | Toots   | 14       | D   | 8      | 1.067     | 0.429           |
| 8099 | Pifithrin-mu                                                           | Toots   | 14       | E   | 8      | 0.705     | -0.02           |
| 6100 | TC 1                                                                   | Toots   | 14       | F   | 8      | 0.056     | -0.568          |
| 6101 | CPT 11                                                                 | Toots   | 14       | G   | 8      | -0.307    | 0.183           |
| 6102 | Reserpine                                                              | Toots   | 14       | H   | 8      | -0.474    | 0.563           |
| 6103 | ZK 756326                                                              | Toots   | 14       | A   | 9      | -0.01     | 0.097           |
| 6104 | Omeprazole                                                             | Toots   | 14       | B   | 9      | 0.522     | -0.074          |
| 6105 | ARP 101                                                                | Toots   | 14       | C   | 9      | 0.736     | 0.023           |
| 6106 | ST 91                                                                  | Toots   | 14       | D   | 9      | 0.63      | 0.085           |
| 6107 | Compound W                                                             | Toots   | 14       | E   | 9      | 1.418     | -1.312          |
| 6108 | Budesonide                                                             | Toots   | 14       | F   | 9      | 1.062     | -1.192          |
| 6109 | Moexipril                                                              | Toots   | 14       | G   | 9      | -0.71     | 0.32            |
| 6110 | Caffeic acid phenethyl ester                                           | Toots   | 14       | H   | 9      | -0.494    | -1.489          |
| 6111 | Amlodipine                                                             | Toots   | 14       | A   | 10     | 0.329     | 0.185           |
| 6112 | CFM 1571                                                               | Toots   | 14       | B   | 10     | -0.143    | 0.345           |
| 6113 | Oxaliplatin                                                            | Toots   | 14       | C   | 10     | 0.004     | 0.096           |
| 6114 | CGK 733                                                                | Toots   | 14       | D   | 10     | 0.852     | 0.149           |
| 6115 | Naproxen                                                               | Toots   | 14       | E   | 10     | 0.639     | -0.568          |
| 6116 | Acarbose                                                               | Toots   | 14       | F   | 10     | 0.431     | -0.356          |
| 6117 | PHA 665752                                                             | Toots   | 14       | G   | 10     | -0.076    | 0.373           |
| 6118 | KF 38789                                                               | Toots   | 14       | H   | 10     | 0.054     | -0.789          |
| 6119 | PSB 069                                                                | Toots   | 14       | A   | 11     | 0.216     | 0.143           |
| 6120 | TCS 359                                                                | Toots   | 14       | B   | 11     | 0.053     | 4.001           |
| 6121 | Zonisamide                                                             | Toots   | 14       | C   | 11     | 0.951     | -0.284          |
| 6122 | L-368899                                                               | Toots   | 14       | D   | 11     | 0.234     | -0.736          |
| 6123 | JX 401                                                                 | Toots   | 14       | E   | 11     | 0.754     | -0.741          |
| 6124 | Y 134                                                                  | Toots   | 14       | F   | 11     | 0.915     | -0.292          |
| 6125 | PD 407824                                                              | Toots   | 14       | G   | 11     | 0.846     | -0.477          |
| 6126 | DCA                                                                    | Toots   | 14       | H   | 11     | -0.897    | 0.149           |
| 6127 | (+)-(4,6-O-Benzylidene)methyl-alpha-D-glucopyranoside                  | NatProd | 1        | B   | 2      | -0.944    | 0.25            |
| 6128 | Chloramphenicol                                                        | NatProd | 1        | B   | 3      | -0.91     | -0.277          |
| 6129 | Riboflavin, Vitamin B2                                                 | NatProd | 1        | B   | 4      | 0.17      | 0.178           |
| 6130 | 4-Nitrophenyl N-acetyl-alpha-galactosaminide                           | NatProd | 1        | B   | 5      | -0.131    | 0.277           |
| 6131 | 2',3',5'-Tri-O-benzoyluridine                                          | NatProd | 1        | B   | 6      | 0.247     | 0.497           |
| 6132 | Gramine                                                                | NatProd | 1        | B   | 7      | -0.976    | 0.386           |
| 6133 | Uridine: 1-beta-D-Ribofuranosyluracil                                  | NatProd | 1        | B   | 8      | -0.014    | -2.833          |
| 6134 | ST024700                                                               | NatProd | 1        | B   | 9      | -0.927    | -0.307          |
| 6135 | S-(5'-Adenosyl)-L-methionine iodide                                    | NatProd | 1        | B   | 10     | -0.751    | -0.718          |
| 6136 | Adenosine 5'-diphosphate sodium salt                                   | NatProd | 1        | B   | 11     | -0.297    | -0.625          |
| 6137 | Isoalantolactone                                                       | NatProd | 1        | C   | 2      | -0.12     | 0.582           |
| 6138 | L-Mimosine                                                             | NatProd | 1        | C   | 3      | 0.193     | 0.403           |
| 6139 | ST011983                                                               | NatProd | 1        | C   | 4      | 0.315     | 0.201           |
| 6140 | Uridine 5'-monophosphate disodium salt; 5'-Uridylic acid disodium salt | NatProd | 1        | C   | 5      | 0.422     | 0.255           |
| 6141 | 2',3',5'-Tri-O-acetyluridine                                           | NatProd | 1        | C   | 6      | 0.926     | 0.408           |
| 6142 | Harmaline hydrochloride dihydrate                                      | NatProd | 1        | C   | 7      | -0.736    | 0.454           |
| 6143 | Salsolidine                                                            | NatProd | 1        | C   | 8      | 0.735     | -3.147          |
| 6144 | Luteoline, Luteolin                                                    | NatProd | 1        | C   | 9      | 0.536     | -0.336          |



SUPPLEMENTARY DATA

|      | Name                                                                  | Library | Plate No | Row | Column | ROS score | viability score |
|------|-----------------------------------------------------------------------|---------|----------|-----|--------|-----------|-----------------|
| 8145 | Rutine                                                                | NatProd | 1        | C   | 10     | 0.095     | -0.514          |
| 8146 | Capensine, Capensin                                                   | NatProd | 1        | C   | 11     | -0.286    | -0.353          |
| 8147 | Methyl cholate                                                        | NatProd | 1        | D   | 2      | -0.603    | 0.297           |
| 8148 | Trifluorothymidine                                                    | NatProd | 1        | D   | 3      | 0.553     | -0.202          |
| 8149 | ST012000                                                              | NatProd | 1        | D   | 4      | 0.199     | 0.393           |
| 8150 | p-Nitrophenyl-alpha-galacto-pyran-oxide                               | NatProd | 1        | D   | 5      | 0.084     | 0.618           |
| 8151 | Lupinine                                                              | NatProd | 1        | D   | 6      | 0.503     | 0.107           |
| 8152 | 3,3',5-Triiodo-L-thyronine                                            | NatProd | 1        | D   | 7      | 0.646     | 0.029           |
| 8153 | Solasodine                                                            | NatProd | 1        | D   | 8      | 1.281     | -2.6            |
| 8154 | Luteolin-7-glucoside                                                  | NatProd | 1        | D   | 9      | 0.818     | 0.175           |
| 8155 | Loline                                                                | NatProd | 1        | D   | 10     | 0.482     | -0.188          |
| 8156 | Cholic acid                                                           | NatProd | 1        | D   | 11     | 0.115     | -0.488          |
| 8157 | ST011742                                                              | NatProd | 1        | E   | 2      | 0.914     | 0.528           |
| 8158 | ST005180                                                              | NatProd | 1        | E   | 3      | -0.5      | 0.881           |
| 8159 | L-4-Chlorophenylalanine                                               | NatProd | 1        | E   | 4      | 1.278     | 0.335           |
| 8160 | Phenylalanine ethyl ester hydrochloride                               | NatProd | 1        | E   | 5      | 0.402     | 0.787           |
| 8161 | Podocarpic acid                                                       | NatProd | 1        | E   | 6      | 0.089     | -0.401          |
| 8162 | Quercetin 3-methyl ether                                              | NatProd | 1        | E   | 7      | -0.412    | 0.285           |
| 8163 | Peganine HCl                                                          | NatProd | 1        | E   | 8      | 0.596     | -2.063          |
| 8164 | Novobiocin sodium salt                                                | NatProd | 1        | E   | 9      | 0.697     | 2.891           |
| 8165 | Sissotrine                                                            | NatProd | 1        | E   | 10     | -0.249    | -0.182          |
| 8166 | Deoxycholic acid methyl ester                                         | NatProd | 1        | E   | 11     | -0.15     | -0.792          |
| 8167 | ST005085                                                              | NatProd | 1        | F   | 2      | -0.514    | 0.603           |
| 8168 | Cytisine                                                              | NatProd | 1        | F   | 3      | ?????     | 0.968           |
| 8169 | Harman                                                                | NatProd | 1        | F   | 4      | -0.536    | 0.579           |
| 8170 | Cytidine 5'-monophosphate                                             | NatProd | 1        | F   | 5      | 1.121     | 0.81            |
| 8171 | Ferric citrate                                                        | NatProd | 1        | F   | 6      | -0.816    | 0.394           |
| 8172 | ST023489                                                              | NatProd | 1        | F   | 7      | -0.372    | 1.002           |
| 8173 | ST024688                                                              | NatProd | 1        | F   | 8      | 0.679     | -0.477          |
| 8174 | L-Thyroxine sodium salt hydrate                                       | NatProd | 1        | F   | 9      | 0.026     | -0.317          |
| 8175 | L-Isoleucine                                                          | NatProd | 1        | F   | 10     | -0.945    | -0.475          |
| 8176 | Leukamiesine, Desacetoxymatricarin                                    | NatProd | 1        | F   | 11     | -0.286    | -0.812          |
| 8177 | ST024694                                                              | NatProd | 1        | G   | 2      | -0.993    | 0.457           |
| 8178 | ST087011                                                              | NatProd | 1        | G   | 3      | -0.452    | 0.737           |
| 8179 | 3'-Adenylic acid                                                      | NatProd | 1        | G   | 4      | -0.583    | 0.912           |
| 8180 | 2'-Deoxycytidine 5'-monophosphate                                     | NatProd | 1        | G   | 5      | 0.073     | 1.476           |
| 8181 | D-Cycloserine; (R)-4-Amino-3-isoxazolidone; 4-Amino-3-isoxazolidinone | NatProd | 1        | G   | 6      | 0.282     | 0.083           |
| 8182 | Laudanosine                                                           | NatProd | 1        | G   | 7      | 0.227     | 1.629           |
| 8183 | ST024699                                                              | NatProd | 1        | G   | 8      | -0.036    | -1.641          |
| 8184 | ST024707                                                              | NatProd | 1        | G   | 9      | -0.219    | -1.078          |
| 8185 | Fraxetin                                                              | NatProd | 1        | G   | 10     | -0.959    | 0.152           |
| 8186 | ST024728                                                              | NatProd | 1        | G   | 11     | -0.473    | -0.202          |
| 8187 | Daphnoretine Acetate                                                  | NatProd | 2        | B   | 2      | -0.989    | 1.012           |
| 8188 | Folic acid or Pteroylglutamic acid                                    | NatProd | 2        | B   | 3      | -0.904    | 0.525           |
| 8189 | (+)-Penicillamine                                                     | NatProd | 2        | B   | 4      | 0.12      | 0.585           |
| 8190 | ST087009                                                              | NatProd | 2        | B   | 5      | -0.233    | 0.072           |
| 8191 | 3-Hydroxy-2'-methoxyflavone                                           | NatProd | 2        | B   | 6      | -0.236    | 0.008           |
| 8192 | Cinoxacin                                                             | NatProd | 2        | B   | 7      | 0.587     | 0.206           |
| 8193 | 3-formyl Rifamycin SV                                                 | NatProd | 2        | B   | 8      | 0.027     | -0.086          |
| 8194 | Emodin                                                                | NatProd | 2        | B   | 9      | -0.132    | -0.459          |
| 8195 | 4'-HYDROXY-3'-METHOXYFLAVONE                                          | NatProd | 2        | B   | 10     | -0.141    | -0.975          |
| 8196 | Karanjin                                                              | NatProd | 2        | B   | 11     | -0.245    | -1.143          |
| 8197 | ST024731                                                              | NatProd | 2        | C   | 2      | -1.13     | 0.893           |
| 8198 | Puerarin                                                              | NatProd | 2        | C   | 3      | 0.407     | 0.389           |
| 8199 | Pregnenolone acetate                                                  | NatProd | 2        | C   | 4      | -1.1      | 0.786           |
| 8200 | ST087010                                                              | NatProd | 2        | C   | 5      | -0.615    | 0.442           |
| 8201 | 6,7-Dimethoxy-4-methylcoumarin                                        | NatProd | 2        | C   | 6      | 0.415     | 0.189           |
| 8202 | Mycophenolic acid                                                     | NatProd | 2        | C   | 7      | 0.451     | -3.055          |
| 8203 | Aconitine, 95%                                                        | NatProd | 2        | C   | 8      | 0.36      | -0.285          |
| 8204 | 7,8-Benzoflavone; alpha-Naphthoflavone                                | NatProd | 2        | C   | 9      | 0.481     | 1.606           |
| 8205 | (+)-6-Aminopenicillanic acid                                          | NatProd | 2        | C   | 10     | -0.211    | -1.186          |
| 8206 | 6-Methylflavonol                                                      | NatProd | 2        | C   | 11     | -0.421    | -1.18           |
| 8207 | PIPERLONGUMINE                                                        | NatProd | 2        | D   | 2      | -0.544    | 0.76            |
| 8208 | Peracetate Fraxetine                                                  | NatProd | 2        | D   | 3      | 0.654     | 0.195           |
| 8209 | ST086274                                                              | NatProd | 2        | D   | 4      | 0.251     | 1.136           |
| 8210 | Kynurenic Acid                                                        | NatProd | 2        | D   | 5      | 0.146     | 0.186           |
| 8211 | L-Tryptophan                                                          | NatProd | 2        | D   | 6      | -0.425    | 0.781           |
| 8212 | 4-Methylumbelliferyl-beta-D-glucuronide trihydrate                    | NatProd | 2        | D   | 7      | 0.144     | 0.287           |
| 8213 | ST051419                                                              | NatProd | 2        | D   | 8      | -0.397    | 1.523           |
| 8214 | 5,3'-DIHYDROXYFLAVONE                                                 | NatProd | 2        | D   | 9      | 0.4       | 1.166           |
| 8215 | Hesperetin                                                            | NatProd | 2        | D   | 10     | 0.016     | -1.062          |
| 8216 | (S,R)-Noscapine                                                       | NatProd | 2        | D   | 11     | -0.446    | -1.166          |
| 8217 | Inosine                                                               | NatProd | 2        | E   | 2      | -0.138    | 0.932           |
| 8218 | Epitestosterone                                                       | NatProd | 2        | E   | 3      | 0.035     | 0.362           |
| 8219 | ST086276                                                              | NatProd | 2        | E   | 4      | 0.318     | 1.285           |
| 8220 | Protopine                                                             | NatProd | 2        | E   | 5      | -0.061    | 0.726           |
| 8221 | L(+)-Ascorbic acid                                                    | NatProd | 2        | E   | 6      | -0.416    | -1.925          |
| 8222 | Flindersine; 5H-Pyrano[3,2-c]quinolin-5-one,2,6-dihydro-2,2-dimethyl  | NatProd | 2        | E   | 7      | 0.309     | -0.981          |
| 8223 | Vanillin                                                              | NatProd | 2        | E   | 8      | -0.435    | 0.18            |
| 8224 | 7,3'-DIHYDROXYFLAVONE                                                 | NatProd | 2        | E   | 9      | 0.56      | -1.665          |
| 8225 | 5'-Isobutylthio-5'-deoxyadenosine                                     | NatProd | 2        | E   | 10     | 0.031     | -1.363          |
| 8226 | (1R,3S)-(-)-beta-Hydrastine ; Hydrastine                              | NatProd | 2        | E   | 11     | 0.441     | -0.942          |
| 8227 | Reserpine                                                             | NatProd | 2        | F   | 2      | 0.347     | 1.222           |
| 8228 | 6alpha-Methyl-11beta-hydroxyprogesterone , Medryson                   | NatProd | 2        | F   | 3      | -0.128    | 1.383           |
| 8229 | Kaempferol                                                            | NatProd | 2        | F   | 4      | 0.404     | 0.645           |
| 8230 | 8-Hydroxyquinoline beta-D-glucopyranoside                             | NatProd | 2        | F   | 5      | 0.054     | 0.417           |
| 8231 | 8-Methoxypsoralen                                                     | NatProd | 2        | F   | 6      | -0.284    | 0.004           |
| 8232 | Oxitriptan; L-5-Hydroxytryptophan;                                    | NatProd | 2        | F   | 7      | 0.217     | -1.014          |
| 8233 | Alizarin                                                              | NatProd | 2        | F   | 8      | 0.014     | 0.066           |
| 8234 | 6-HYDROXY-2'-METHOXYFLAVONE                                           | NatProd | 2        | F   | 9      | 0.402     | -0.73           |
| 8235 | Curcumine                                                             | NatProd | 2        | F   | 10     | -0.069    | -0.721          |
| 8236 | Biotin                                                                | NatProd | 2        | F   | 11     | 0.124     | -1.541          |
| 8237 | Equilin                                                               | NatProd | 2        | G   | 2      | 0.007     | 1.113           |
| 8238 | Medroxyprogesterone                                                   | NatProd | 2        | G   | 3      | -0.386    | 0.893           |
| 8239 | Strophanthidin                                                        | NatProd | 2        | G   | 4      | -0.767    | 1.068           |
| 8240 | Hippuric acid                                                         | NatProd | 2        | G   | 5      | 0.11      | 0.413           |
| 8241 | Rifamycin SV sodium salt                                              | NatProd | 2        | G   | 6      | 0.128     | -0.33           |
| 8242 | Dehydroglauicine                                                      | NatProd | 2        | G   | 7      | -0.289    | 1.185           |
| 8243 | Purpurn                                                               | NatProd | 2        | G   | 8      | -1.23     | -0.485          |
| 8244 | 7-HYDROXY-4'-METHOXYFLAVONE                                           | NatProd | 2        | G   | 9      | 0.091     | -0.303          |
| 8245 | 3,2'-DIMETHOXYFLAVONE                                                 | NatProd | 2        | G   | 10     | -0.382    | -1.593          |
| 8246 | Nicergoline                                                           | NatProd | 2        | G   | 11     | -0.485    | -0.319          |
| 8247 | Phloridzin dihydrate                                                  | NatProd | 3        | B   | 2      | -0.503    | 0.678           |
| 8248 | 3-HYDROXY-3'-METHOXYFLAVONE                                           | NatProd | 3        | B   | 3      | -0.097    | 0.048           |
| 8249 | 2'-HYDROXY-5-NAPHTHOFILAVONE                                          | NatProd | 3        | B   | 4      | -0.844    | 0.473           |

SUPPLEMENTARY DATA

|      | Name                                                                                    | Library | Plate No | Row | Column | ROS score | viability score |
|------|-----------------------------------------------------------------------------------------|---------|----------|-----|--------|-----------|-----------------|
| 6250 | 5,3',4'-TRIHYDROXYFLAVONE                                                               | NatProd | 3        | B   | 5      | 0.032     | 1.357           |
| 6251 | ST056196                                                                                | NatProd | 3        | B   | 6      | 0.214     | 0.626           |
| 6252 | Yohimbic acid monohydrate                                                               | NatProd | 3        | B   | 7      | -0.188    | 0.549           |
| 6253 | Scopoletin                                                                              | NatProd | 3        | B   | 8      | 0.379     | 0.716           |
| 6254 | Corynanthine hydrochloride                                                              | NatProd | 3        | B   | 9      | 0.664     | -0.309          |
| 6255 | Apigenin                                                                                | NatProd | 3        | B   | 10     | -0.487    | -0.069          |
| 6256 | (±)-Abscisic acid, abscisin II; dommin; ABA                                             | NatProd | 3        | B   | 11     | -0.537    | -2.097          |
| 6257 | 2',3'-DIHYDROXYFLAVONE                                                                  | NatProd | 3        | C   | 2      | 0.108     | 0.029           |
| 6258 | 6-HYDROXY-3-METHOXYFLAVONE                                                              | NatProd | 3        | C   | 3      | 0.093     | 1.333           |
| 6259 | 4'-HYDROXY-5-METHOXYFLAVONE                                                             | NatProd | 3        | C   | 4      | 0.388     | 0.518           |
| 6260 | 5,7,2'-Trihydroxyflavone                                                                | NatProd | 3        | C   | 5      | 0.378     | 0.685           |
| 6261 | Nordihydroguaiaretic acid                                                               | NatProd | 3        | C   | 6      | 0.178     | 0.783           |
| 6262 | (+)-Dehydroabietylamine ; Leelamine                                                     | NatProd | 3        | C   | 7      | 0.925     | -2.416          |
| 6263 | Galangin                                                                                | NatProd | 3        | C   | 8      | 0.126     | 0.453           |
| 6264 | ST056295                                                                                | NatProd | 3        | C   | 9      | 0.684     | 0.173           |
| 6265 | (-)-Ouabain hydrate                                                                     | NatProd | 3        | C   | 10     | 0.085     | 0.477           |
| 6266 | Chlorogenic Acid                                                                        | NatProd | 3        | C   | 11     | -0.216    | -1.476          |
| 6267 | 2',4'-DIHYDROXYFLAVONE                                                                  | NatProd | 3        | D   | 2      | -0.7      | 0.48            |
| 6268 | 8-HYDROXY-7-METHOXYFLAVONE                                                              | NatProd | 3        | D   | 3      | 0.807     | 0.05            |
| 6269 | 4'-HYDROXY-6-METHOXYFLAVONE                                                             | NatProd | 3        | D   | 4      | -0.588    | 0.168           |
| 6270 | 7,8,2'-TRIHYDROXYFLAVONE                                                                | NatProd | 3        | D   | 5      | -0.602    | 1.052           |
| 6271 | DL-5-Methoxytryptophan                                                                  | NatProd | 3        | D   | 6      | 0.247     | 0.187           |
| 6272 | Quinine                                                                                 | NatProd | 3        | D   | 7      | -0.692    | 0.987           |
| 6273 | Ursolic acid                                                                            | NatProd | 3        | D   | 8      | 0.295     | 1.72            |
| 6274 | (-)-Asanin                                                                              | NatProd | 3        | D   | 9      | 0.572     | 0.23            |
| 6275 | (-)-Erythromycin hydrate                                                                | NatProd | 3        | D   | 10     | -0.375    | 0.359           |
| 6276 | Esculin                                                                                 | NatProd | 3        | D   | 11     | -0.943    | -0.718          |
| 6277 | 3,6-DIMETHOXYFLAVONE                                                                    | NatProd | 3        | E   | 2      | -0.226    | 2.681           |
| 6278 | 7-HYDROXY-3-METHYLFLAVONE                                                               | NatProd | 3        | E   | 3      | 0.249     | 0.155           |
| 6279 | 4'-HYDROXY-7-METHOXYFLAVONE                                                             | NatProd | 3        | E   | 4      | -0.132    | -0.071          |
| 6280 | 7,8,3'-TRIHYDROXYFLAVONE                                                                | NatProd | 3        | E   | 5      | 0.195     | -0.222          |
| 6281 | Serotonin hydrochloride                                                                 | NatProd | 3        | E   | 6      | -0.027    | -0.069          |
| 6282 | Abietic acid                                                                            | NatProd | 3        | E   | 7      | 0.259     | 0.45            |
| 6283 | ST087013                                                                                | NatProd | 3        | E   | 8      | -0.137    | 0.835           |
| 6284 | Camptothecin                                                                            | NatProd | 3        | E   | 9      | 0.381     | -3.127          |
| 6285 | Gnseofulvin                                                                             | NatProd | 3        | E   | 10     | -0.012    | 0.34            |
| 6286 | Enoxolone                                                                               | NatProd | 3        | E   | 11     | 0.177     | -0.621          |
| 6287 | 6,7-DIMETHOXYFLAVONE                                                                    | NatProd | 3        | F   | 2      | 0.764     | 0.948           |
| 6288 | 2'-HYDROXY- $\alpha$ -NAPHTHOFLAVONE                                                    | NatProd | 3        | F   | 3      | 0.038     | 0.025           |
| 6289 | 3,7,4'-TRIHYDROXYFLAVONE                                                                | NatProd | 3        | F   | 4      | 0.047     | 0.006           |
| 6290 | 3,3',4'-TRIHYDROXYFLAVONE                                                               | NatProd | 3        | F   | 5      | -0.669    | -1.872          |
| 6291 | 3',4'-Dimethoxy-3-hydroxy-6-methylflavone                                               | NatProd | 3        | F   | 6      | -0.072    | 0.857           |
| 6292 | Vincamine                                                                               | NatProd | 3        | F   | 7      | 0.16      | -0.397          |
| 6293 | Hydroquinidine                                                                          | NatProd | 3        | F   | 8      | 0.303     | -0.118          |
| 6294 | Baicalin hydrate                                                                        | NatProd | 3        | F   | 9      | 0.055     | 0.106           |
| 6295 | (+)-Cinchonine                                                                          | NatProd | 3        | F   | 10     | -0.577    | -1.006          |
| 6296 | Gibberellic Acid                                                                        | NatProd | 3        | F   | 11     | -0.586    | -1.535          |
| 6297 | 3,3'-DIHYDROXYFLAVONE                                                                   | NatProd | 3        | G   | 2      | -0.084    | 0.27            |
| 6298 | 6-HYDROXY-7-METHOXYFLAVONE                                                              | NatProd | 3        | G   | 3      | 0.086     | -0.223          |
| 6299 | 3,6,4'-TRIHYDROXYFLAVONE                                                                | NatProd | 3        | G   | 4      | -0.317    | -0.658          |
| 6300 | (-)-Galanthamine                                                                        | NatProd | 3        | G   | 5      | -0.505    | -0.493          |
| 6301 | 7-Hydroxy-5-methylflavone                                                               | NatProd | 3        | G   | 6      | -0.129    | 0.278           |
| 6302 | Eserine                                                                                 | NatProd | 3        | G   | 7      | 0.379     | -0.246          |
| 6303 | Artemisinin                                                                             | NatProd | 3        | G   | 8      | -0.099    | 0.051           |
| 6304 | ST056299                                                                                | NatProd | 3        | G   | 9      | -0.564    | -0.236          |
| 6305 | (-)-Cyclocytidine hydrochloride; Ancitabin hydrochloride                                | NatProd | 3        | G   | 10     | -0.007    | -1.502          |
| 6306 | (-)-Eburnamonine ; (3a,16a)-Eburnamenin-14(15H)-one; 16-oxoeburnane; vincamone          | NatProd | 3        | G   | 11     | -1.331    | -1.666          |
| 6307 | (+)-Emetine dihydrochloride hydrate                                                     | NatProd | 4        | B   | 2      | 0.557     | -4.55           |
| 6308 | Etoposide; VP-16-213                                                                    | NatProd | 4        | B   | 3      | 0.357     | -0.297          |
| 6309 | 2',3'-Dideoxyuridine                                                                    | NatProd | 4        | B   | 4      | -0.605    | -0.288          |
| 6310 | Cytidine                                                                                | NatProd | 4        | B   | 5      | -0.066    | 0.636           |
| 6311 | all-trans-Retinoic acid; Tretinoin; vitamin A acid                                      | NatProd | 4        | B   | 6      | 0.91      | 0.152           |
| 6312 | 2'-Deoxyadenosine 5'-monophosphoric acid hydrate                                        | NatProd | 4        | B   | 7      | -0.404    | 0.538           |
| 6313 | 2'-Deoxycytidine monohydrate                                                            | NatProd | 4        | B   | 8      | 0.527     | -0.421          |
| 6314 | Baicalein                                                                               | NatProd | 4        | B   | 9      | 0.193     | -1.104          |
| 6315 | Ergonovine                                                                              | NatProd | 4        | B   | 10     | -0.478    | -1.324          |
| 6316 | Phloretin                                                                               | NatProd | 4        | B   | 11     | -0.007    | -0.588          |
| 6317 | $\alpha$ -Santonin                                                                      | NatProd | 4        | C   | 2      | -0.706    | 1.801           |
| 6318 | Rottlerin                                                                               | NatProd | 4        | C   | 3      | 1.503     | 1.454           |
| 6319 | N4-Benzoylcytidine                                                                      | NatProd | 4        | C   | 4      | -0.957    | -0.525          |
| 6320 | 2',3'-O-Isopropylideneuridine                                                           | NatProd | 4        | C   | 5      | 0.084     | 1.081           |
| 6321 | L-Camosine                                                                              | NatProd | 4        | C   | 6      | -0.085    | -0.618          |
| 6322 | 2'-Deoxyguanosine 5'-monophosphate, sodium salt hydrate                                 | NatProd | 4        | C   | 7      | 0.212     | 0.485           |
| 6323 | Cytidine-2',3'-monophosphoric acid; 3'-Cytidylic acid                                   | NatProd | 4        | C   | 8      | 0.425     | 0.189           |
| 6324 | Austincine                                                                              | NatProd | 4        | C   | 9      | 0.725     | -0.982          |
| 6325 | Ginkgolide B                                                                            | NatProd | 4        | C   | 10     | 0.185     | -0.036          |
| 6326 | Securinine                                                                              | NatProd | 4        | C   | 11     | -0.051    | 0.204           |
| 6327 | Hydrocinchonine                                                                         | NatProd | 4        | D   | 2      | -0.849    | 0.362           |
| 6328 | Colchicine                                                                              | NatProd | 4        | D   | 3      | -0.353    | 0.826           |
| 6329 | 3-Deazauridine                                                                          | NatProd | 4        | D   | 4      | -0.65     | -1.256          |
| 6330 | Thymidine                                                                               | NatProd | 4        | D   | 5      | 0.263     | 0.167           |
| 6331 | 2',3'-O-Isopropylideneadenosine                                                         | NatProd | 4        | D   | 6      | -0.253    | 0.448           |
| 6332 | 6-Benzylaminopurine riboside                                                            | NatProd | 4        | D   | 7      | 0.286     | -0.349          |
| 6333 | Adenosine 5'-diphosphate, monosodium salt dihydrate                                     | NatProd | 4        | D   | 8      | 0.215     | -0.853          |
| 6334 | Ajmaline, rauwolfine                                                                    | NatProd | 4        | D   | 9      | -0.261    | 0.395           |
| 6335 | KARAKOLINE FROM RANUNCULACEAE FAMILY                                                    | NatProd | 4        | D   | 10     | -0.166    | 1.182           |
| 6336 | Tetracycline hydrochloride                                                              | NatProd | 4        | D   | 11     | 1.062     | 0.544           |
| 6337 | Dihydroergotamine mesylate                                                              | NatProd | 4        | E   | 2      | -0.35     | 1.155           |
| 6338 | Dipoxigenin                                                                             | NatProd | 4        | E   | 3      | -0.318    | 0.822           |
| 6339 | N4-Aminocytidine                                                                        | NatProd | 4        | E   | 4      | -0.294    | 0.574           |
| 6340 | Tetrahydropapaveroline hydrobromide                                                     | NatProd | 4        | E   | 5      | -0.154    | 0.037           |
| 6341 | 2'-Deoxyadenosine hydrate                                                               | NatProd | 4        | E   | 6      | -0.402    | 0.004           |
| 6342 | Kinetin-9-riboside                                                                      | NatProd | 4        | E   | 7      | -0.464    | 1.433           |
| 6343 | Guanosine                                                                               | NatProd | 4        | E   | 8      | 0.09      | -0.132          |
| 6344 | (-)-Bilobalide                                                                          | NatProd | 4        | E   | 9      | 0.175     | -1.164          |
| 6345 | Noscapine hydrochloride hydrate (Narotine)                                              | NatProd | 4        | E   | 10     | 0.491     | 0.24            |
| 6346 | (+)-Isocorydine; artabotrine; luteanine                                                 | NatProd | 4        | E   | 11     | -0.214    | -0.225          |
| 6347 | Metergoline phenylmethyl ester                                                          | NatProd | 4        | F   | 2      | -1.418    | 0.986           |
| 6348 | Tryptophylglycine, Trp-Gly                                                              | NatProd | 4        | F   | 3      | -0.888    | 0.794           |
| 6349 | 5-Ethyl-2'-deoxyuridine ; Edoxudine                                                     | NatProd | 4        | F   | 4      | -0.849    | 1.046           |
| 6350 | Retrorsine                                                                              | NatProd | 4        | F   | 5      | -0.087    | -0.143          |
| 6351 | Xanthosine dihydrate                                                                    | NatProd | 4        | F   | 6      | -0.826    | 0.097           |
| 6352 | Guanosine 5'-monophosphate, disodium salt hydrate, 3'-Guanilic acid                     | NatProd | 4        | F   | 7      | -0.402    | 1.182           |
| 6353 | Vitamin D2, calciferol; ergocalciferol; oleovitamin D2; activated ergosterol; viosterol | NatProd | 4        | F   | 8      | 0.184     | 0.729           |
| 6354 | Corynanthine                                                                            | NatProd | 4        | F   | 9      | 0.055     | -0.997          |

SUPPLEMENTARY DATA

|      | Name                                                                                          | Library | Plate No | Row | Column | ROS score | viability score |
|------|-----------------------------------------------------------------------------------------------|---------|----------|-----|--------|-----------|-----------------|
| 6355 | Oleanolic acid, oleanol, caryophyllin                                                         | NatProd | 4        | F   | 10     | 0.3       | 0.919           |
| 6356 | Labeline hydrochloride                                                                        | NatProd | 4        | F   | 11     | 0.115     | -0.424          |
| 6357 | Rauwolfscine hydrochloride                                                                    | NatProd | 4        | G   | 2      | 0.082     | 0.913           |
| 6358 | 6-Azauridine                                                                                  | NatProd | 4        | G   | 3      | 0         | -0.448          |
| 6359 | 5-Methoxyuridine                                                                              | NatProd | 4        | G   | 4      | -0.454    | -0.177          |
| 6360 | Ellagic acid hydrate                                                                          | NatProd | 4        | G   | 5      | -0.84     | -1.802          |
| 6361 | Inosine 5'-monophosphate, disodium salt hydrate                                               | NatProd | 4        | G   | 6      | 0.282     | -0.118          |
| 6362 | 2-Deoxyuridine                                                                                | NatProd | 4        | G   | 7      | -1.084    | -0.598          |
| 6363 | (3aR)-(+)-Sclareolide                                                                         | NatProd | 4        | G   | 8      | -0.022    | 0.401           |
| 6364 | (1)-Cotinine                                                                                  | NatProd | 4        | G   | 9      | -0.644    | -1.571          |
| 6365 | Pilocarpine hydrochloride                                                                     | NatProd | 4        | G   | 10     | 0.366     | -0.321          |
| 6366 | Cholecalciferol ; Vitamin D3; activated 7-dehydrocholesterol; oleovitamin D3; cholecalciferol | NatProd | 4        | G   | 11     | -0.193    | -0.47           |
| 6367 | Ginkgolide A                                                                                  | NatProd | 5        | B   | 2      | -0.607    | 0.746           |
| 6368 | Hydrastinine hydrochloride                                                                    | NatProd | 5        | B   | 3      | -0.527    | 0.391           |
| 6369 | Embelin                                                                                       | NatProd | 5        | B   | 4      | 0.118     | -0.188          |
| 6370 | Naringenin                                                                                    | NatProd | 5        | B   | 5      | -0.284    | 0.482           |
| 6371 | ST057244                                                                                      | NatProd | 5        | B   | 6      | 0.076     | -0.189          |
| 6372 | Strychnine                                                                                    | NatProd | 5        | B   | 7      | 0.002     | -0.17           |
| 6373 | Rotenone                                                                                      | NatProd | 5        | B   | 8      | 1.601     | -4.112          |
| 6374 | Cephapirin sodium salt                                                                        | NatProd | 5        | B   | 9      | -0.31     | -0.394          |
| 6375 | Prazosin hydrochloride                                                                        | NatProd | 5        | B   | 10     | -0.087    | -0.86           |
| 6376 | (+)-Bicuculline                                                                               | NatProd | 5        | B   | 11     | -0.614    | -0.183          |
| 6377 | Fusaric acid ; 5-butylpicolinic acid                                                          | NatProd | 5        | C   | 2      | -0.828    | 0.99            |
| 6378 | Capsaicin                                                                                     | NatProd | 5        | C   | 3      | -0.094    | 0.728           |
| 6379 | Colchicine                                                                                    | NatProd | 5        | C   | 4      | -1.086    | -0.059          |
| 6380 | Harmalol                                                                                      | NatProd | 5        | C   | 5      | -0.812    | 0.352           |
| 6381 | Hespendin, 80%                                                                                | NatProd | 5        | C   | 6      | 0.327     | 0.096           |
| 6382 | Caryophyllene oxide, 99%                                                                      | NatProd | 5        | C   | 7      | 0.518     | 0.421           |
| 6383 | Kinetin, 98%                                                                                  | NatProd | 5        | C   | 8      | 0.705     | -0.323          |
| 6384 | DAIDZEIN                                                                                      | NatProd | 5        | C   | 9      | 0.736     | -0.143          |
| 6385 | Rifampicin                                                                                    | NatProd | 5        | C   | 10     | 0.341     | -0.255          |
| 6386 | (+)-Usnic acid                                                                                | NatProd | 5        | C   | 11     | 0.095     | -0.291          |
| 6387 | Anisomycin                                                                                    | NatProd | 5        | D   | 2      | 1.652     | -2.467          |
| 6388 | Animicin A                                                                                    | NatProd | 5        | D   | 3      | 1.654     | -3.747          |
| 6389 | Cefaclor                                                                                      | NatProd | 5        | D   | 4      | 0.081     | 0.318           |
| 6390 | Mangiferin                                                                                    | NatProd | 5        | D   | 5      | 0.048     | 0.675           |
| 6391 | (+/-)-Jasmonic acid                                                                           | NatProd | 5        | D   | 6      | -0.081    | 0.761           |
| 6392 | Monocrotaline                                                                                 | NatProd | 5        | D   | 7      | 0.32      | 0.388           |
| 6393 | Asiatic acid                                                                                  | NatProd | 5        | D   | 8      | -0.681    | 0.225           |
| 6394 | (-)-Eseroline, Fumarate salt                                                                  | NatProd | 5        | D   | 9      | 0.424     | 0.038           |
| 6395 | Dihydrocapsaicin                                                                              | NatProd | 5        | D   | 10     | 0.452     | 0.082           |
| 6396 | Biochanin A                                                                                   | NatProd | 5        | D   | 11     | -0.703    | 1.172           |
| 6397 | (±)-Catechin hydrate                                                                          | NatProd | 5        | E   | 2      | -0.505    | 1.079           |
| 6398 | DL-lyxurenine sulfate salt, DL-2-Amino-4-(2-aminophenyl)-4-oxobutanoic acid                   | NatProd | 5        | E   | 3      | 0.068     | 0.708           |
| 6399 | Retinol; Vitamin A, synthetic, 95. %                                                          | NatProd | 5        | E   | 4      | 0.326     | 0.362           |
| 6400 | Mangostin                                                                                     | NatProd | 5        | E   | 5      | -0.558    | 2.031           |
| 6401 | Parthenolide                                                                                  | NatProd | 5        | E   | 6      | 0.829     | 0.547           |
| 6402 | Dihydrofolic acid, 90%                                                                        | NatProd | 5        | E   | 7      | -0.676    | 0.26            |
| 6403 | Norcantharidin                                                                                | NatProd | 5        | E   | 8      | 0.508     | -0.488          |
| 6404 | ST087016                                                                                      | NatProd | 5        | E   | 9      | 0.016     | -0.038          |
| 6405 | Pergolide mesylate                                                                            | NatProd | 5        | E   | 10     | 0.275     | -0.76           |
| 6406 | alpha-Ergocryptine                                                                            | NatProd | 5        | E   | 11     | -0.016    | 2.187           |
| 6407 | Atropine                                                                                      | NatProd | 5        | F   | 2      | -0.595    | 0.85            |
| 6408 | Gossypin, 3,5,7,8,3',4'-hexahydroxyflavone-8-glucoside                                        | NatProd | 5        | F   | 3      | -0.623    | 0.452           |
| 6409 | Fisetin                                                                                       | NatProd | 5        | F   | 4      | -0.653    | 0.088           |
| 6410 | Picrotin                                                                                      | NatProd | 5        | F   | 5      | -1.106    | 0.464           |
| 6411 | Psoralen                                                                                      | NatProd | 5        | F   | 6      | 0.399     | -0.146          |
| 6412 | Bergapten; 5-Methoxypsoralen, 99%                                                             | NatProd | 5        | F   | 7      | 0.092     | -0.259          |
| 6413 | Cinchonamine                                                                                  | NatProd | 5        | F   | 8      | -0.532    | -0.161          |
| 6414 | Caffeine                                                                                      | NatProd | 5        | F   | 9      | -0.261    | -0.005          |
| 6415 | Lysergol                                                                                      | NatProd | 5        | F   | 10     | 0.206     | -0.577          |
| 6416 | trans-Zeatin                                                                                  | NatProd | 5        | F   | 11     | 0.143     | -0.272          |
| 6417 | (+)-Chelidonium monohydrate                                                                   | NatProd | 5        | G   | 2      | -0.273    | -0.794          |
| 6418 | Hematein                                                                                      | NatProd | 5        | G   | 3      | -1.316    | 0.527           |
| 6419 | Myricetin                                                                                     | NatProd | 5        | G   | 4      | -0.081    | 0.165           |
| 6420 | Picrotoxinin                                                                                  | NatProd | 5        | G   | 5      | -0.765    | 0.513           |
| 6421 | Resveratrol, 99%                                                                              | NatProd | 5        | G   | 6      | 0.319     | 0.211           |
| 6422 | Melatonin                                                                                     | NatProd | 5        | G   | 7      | -0.114    | -0.098          |
| 6423 | 2',3',6'-Trimethoxyflavone, 95%                                                               | NatProd | 5        | G   | 8      | 0.325     | -0.467          |
| 6424 | Caffeic acid                                                                                  | NatProd | 5        | G   | 9      | -1.24     | -0.126          |
| 6425 | 5-HYDROXY-7-METHOXYFLAVONE                                                                    | NatProd | 5        | G   | 10     | 0.365     | -0.597          |
| 6426 | Andrographolide                                                                               | NatProd | 5        | G   | 11     | 0.184     | -0.337          |
| 6427 | Ergocornine                                                                                   | NatProd | 6        | B   | 2      | 0.337     | 1.983           |
| 6428 | Thermopsine                                                                                   | NatProd | 6        | B   | 3      | 0.24      | 0.377           |
| 6429 | Seneciphylline                                                                                | NatProd | 6        | B   | 4      | -0.008    | 0.202           |
| 6430 | 2',3',6'-Trimethoxyflavanone                                                                  | NatProd | 6        | B   | 5      | -0.41     | -0.433          |
| 6431 | Asiaticoside                                                                                  | NatProd | 6        | B   | 6      | 0.521     | 0.158           |
| 6432 | DL-Histidine hydrochloride, monohydrate                                                       | NatProd | 6        | B   | 7      | -0.412    | -0.443          |
| 6433 | ST060285                                                                                      | NatProd | 6        | B   | 8      | -0.306    | -0.609          |
| 6434 | 6-ethylmercaptapurine                                                                         | NatProd | 6        | B   | 9      | -1.026    | -0.381          |
| 6435 | Conessine                                                                                     | NatProd | 6        | B   | 10     | -0.822    | -0.619          |
| 6436 | Oxytetracycline hydrochloride                                                                 | NatProd | 6        | B   | 11     | 0.242     | -0.364          |
| 6437 | Ergocristine                                                                                  | NatProd | 6        | C   | 2      | -0.123    | 1.027           |
| 6438 | ST057699                                                                                      | NatProd | 6        | C   | 3      | -0.137    | 0.979           |
| 6439 | Cryptopine, Cryptocavine                                                                      | NatProd | 6        | C   | 4      | -0.852    | 0.291           |
| 6440 | Orcinol                                                                                       | NatProd | 6        | C   | 5      | 0.182     | -0.359          |
| 6441 | Otosenine                                                                                     | NatProd | 6        | C   | 6      | 0.015     | 0.232           |
| 6442 | Pyridoxal hydrochloride                                                                       | NatProd | 6        | C   | 7      | -0.147    | 0.105           |
| 6443 | 7-methoxy-4-methylcoumarin                                                                    | NatProd | 6        | C   | 8      | -0.262    | -0.193          |
| 6444 | L-abrine                                                                                      | NatProd | 6        | C   | 9      | 0.232     | -0.195          |
| 6445 | VERAPAMIL HYDROCHLORIDE                                                                       | NatProd | 6        | C   | 10     | -1.052    | -0.088          |
| 6446 | Rosmarinic acid                                                                               | NatProd | 6        | C   | 11     | 0.464     | -0.513          |
| 6447 | Berberamine dihydrochloride                                                                   | NatProd | 6        | D   | 2      | 0.194     | 0.774           |
| 6448 | ST057700                                                                                      | NatProd | 6        | D   | 3      | -0.146    | 1.318           |
| 6449 | N-methylcorydaldine                                                                           | NatProd | 6        | D   | 4      | -1.243    | 0.765           |
| 6450 | Biotin methyl ester                                                                           | NatProd | 6        | D   | 5      | -0.163    | 0.528           |
| 6451 | Leontiformine HBr                                                                             | NatProd | 6        | D   | 6      | -0.592    | 0.523           |
| 6452 | Gossypetin                                                                                    | NatProd | 6        | D   | 7      | -0.481    | 0.484           |
| 6453 | GOSSYPOL                                                                                      | NatProd | 6        | D   | 8      | -0.787    | 0.107           |
| 6454 | Acacetin                                                                                      | NatProd | 6        | D   | 9      | 0.065     | 0.818           |
| 6455 | (S)-(+)-KETOPROFEN, AG-494                                                                    | NatProd | 6        | D   | 10     | 0.571     | -0.154          |
| 6456 | Phenylpyruvic acid                                                                            | NatProd | 6        | D   | 11     | -0.101    | 0.174           |
| 6457 | (S,S)-(+)-Tetrandrine                                                                         | NatProd | 6        | E   | 2      | 0.403     | 0.604           |
| 6458 | Thaliporphine, thalomidine                                                                    | NatProd | 6        | E   | 3      | -0.02     | 1.11            |
| 6459 | Rhein                                                                                         | NatProd | 6        | E   | 4      | 0.204     | 0.808           |



SUPPLEMENTARY DATA

|      | Name                                                                                                           | Library | Plate No | Row | Column | ROS score | viability score |
|------|----------------------------------------------------------------------------------------------------------------|---------|----------|-----|--------|-----------|-----------------|
| 6480 | 4-Hydroxy-6-methoxycoumarin, 98%                                                                               | NatProd | 6        | E   | 5      | -0.287    | 0.142           |
| 6481 | FMOCL-Isoleucine                                                                                               | NatProd | 6        | E   | 6      | -0.863    | -0.279          |
| 6482 | Monin hydrate                                                                                                  | NatProd | 6        | E   | 7      | -0.117    | 0.031           |
| 6483 | DL-Norphenylephrine hydrochloride                                                                              | NatProd | 6        | E   | 8      | -0.024    | 0.174           |
| 6484 | 4'-Methoxyflavonol                                                                                             | NatProd | 6        | E   | 9      | -0.185    | -0.301          |
| 6485 | Spectinomycin dihydrochloride pentahydrate                                                                     | NatProd | 6        | E   | 10     | -0.55     | 0.371           |
| 6486 | D-Pinitol ; 3-O-Methyl-D-chiro-inositol                                                                        | NatProd | 6        | E   | 11     | -0.298    | 0.298           |
| 6487 | Orcein, Natural Red 28                                                                                         | NatProd | 6        | F   | 2      | -0.687    | 0.678           |
| 6488 | Isoboldine                                                                                                     | NatProd | 6        | F   | 3      | -0.091    | 0.632           |
| 6489 | 4',5-Dihydroxyflavone                                                                                          | NatProd | 6        | F   | 4      | -0.035    | 0.989           |
| 6470 | Primuliten, 5-Hydroxyflavone                                                                                   | NatProd | 6        | F   | 5      | 0.01      | 0.501           |
| 6471 | Harmol hydrochloride dihydrate                                                                                 | NatProd | 6        | F   | 6      | -0.185    | -0.353          |
| 6472 | 7,8-Dimethoxy-4-methylcoumarin                                                                                 | NatProd | 6        | F   | 7      | -0.097    | -0.006          |
| 6473 | N-2-Acetylguanine                                                                                              | NatProd | 6        | F   | 8      | -0.46     | -0.489          |
| 6474 | 7-Methoxyisoflavone, 98%                                                                                       | NatProd | 6        | F   | 9      | -0.433    | -0.56           |
| 6475 | Mevinolin; Lovastatin                                                                                          | NatProd | 6        | F   | 10     | 1.854     | -4.664          |
| 6476 | (1S,2R,5S)-(+)-Menthol                                                                                         | NatProd | 6        | F   | 11     | -0.344    | -0.732          |
| 6477 | Phloretin                                                                                                      | NatProd | 6        | G   | 2      | -0.125    | -0.088          |
| 6478 | Oxoglaucine                                                                                                    | NatProd | 6        | G   | 3      | -0.303    | 1.005           |
| 6479 | Cantharidin                                                                                                    | NatProd | 6        | G   | 4      | 2.172     | -3.977          |
| 6480 | Lagochilone                                                                                                    | NatProd | 6        | G   | 5      | -1.115    | 0.105           |
| 6481 | L-Azetidine-2-carboxylic acid                                                                                  | NatProd | 6        | G   | 6      | -0.112    | -0.174          |
| 6482 | 6,7-Dimethoxy-4-ethylcoumarin                                                                                  | NatProd | 6        | G   | 7      | 0.004     | -0.217          |
| 6483 | 2'-Deoxyguanosine hydrate                                                                                      | NatProd | 6        | G   | 8      | 0.005     | -0.502          |
| 6484 | Sumaresinolic acid                                                                                             | NatProd | 6        | G   | 9      | -0.488    | 0.067           |
| 6485 | Podophyllotoxin                                                                                                | NatProd | 6        | G   | 10     | 1.102     | -0.719          |
| 6486 | (1R,3R,4R,5R)-(-)-Quinic acid                                                                                  | NatProd | 6        | G   | 11     | -0.36     | -0.97           |
| 6487 | Hydrocortisone, 98%                                                                                            | NatProd | 7        | B   | 2      | 0.236     | 1.225           |
| 6488 | ST069302                                                                                                       | NatProd | 7        | B   | 3      | -1.6      | 0.175           |
| 6489 | Harmine                                                                                                        | NatProd | 7        | B   | 4      | -0.09     | -1.005          |
| 6490 | L(-)-Verbenone                                                                                                 | NatProd | 7        | B   | 5      | 0.102     | 1.139           |
| 6491 | D(+)-Carvone                                                                                                   | NatProd | 7        | B   | 6      | 0.308     | -1.011          |
| 6492 | Digoxin                                                                                                        | NatProd | 7        | B   | 7      | -0.18     | -0.337          |
| 6493 | Isosafrole, mixture of Cis and Trans                                                                           | NatProd | 7        | B   | 8      | -0.087    | 0.683           |
| 6494 | Epinephrine; L-Adrenaline, 98+%                                                                                | NatProd | 7        | B   | 9      | -0.701    | 0.471           |
| 6495 | Naringin                                                                                                       | NatProd | 7        | B   | 10     | 0.025     | -1.488          |
| 6496 | 3(2'-Chlorophenyl)-4,6-dimethylcoumarin, 98%                                                                   | NatProd | 7        | B   | 11     | -0.348    | 0.101           |
| 6497 | L(-)-Anabasin Hydrochloride                                                                                    | NatProd | 7        | C   | 2      | 0.876     | 1.312           |
| 6498 | ST069303                                                                                                       | NatProd | 7        | C   | 3      | 0.642     | 0.297           |
| 6499 | Shikimic acid                                                                                                  | NatProd | 7        | C   | 4      | 0.138     | -0.482          |
| 6500 | Isophytol                                                                                                      | NatProd | 7        | C   | 5      | 0.371     | 0.157           |
| 6501 | Progesterone                                                                                                   | NatProd | 7        | C   | 6      | -0.129    | -0.855          |
| 6502 | Lithocholic acid                                                                                               | NatProd | 7        | C   | 7      | 0.294     | 0.027           |
| 6503 | 6-Methylflavone                                                                                                | NatProd | 7        | C   | 8      | 0.257     | 0.272           |
| 6504 | trans-Dehydroandrosterone , dehydroisandrosterone                                                              | NatProd | 7        | C   | 9      | 1.008     | 0.948           |
| 6505 | Rutin                                                                                                          | NatProd | 7        | C   | 10     | -0.252    | -1.173          |
| 6506 | Ergotamine D-tartrate; C33H35N5O5 ; 0.5C4H8O6                                                                  | NatProd | 7        | C   | 11     | 0.184     | 4.379           |
| 6507 | Gossypolone                                                                                                    | NatProd | 7        | D   | 2      | 0.246     | 0.284           |
| 6508 | Coumarin 343                                                                                                   | NatProd | 7        | D   | 3      | -0.191    | -0.238          |
| 6509 | L(+)-Citrulline                                                                                                | NatProd | 7        | D   | 4      | 1.005     | 0.124           |
| 6510 | Chrysin                                                                                                        | NatProd | 7        | D   | 5      | -0.09     | 0.994           |
| 6511 | DL-Methionine sulfoxide                                                                                        | NatProd | 7        | D   | 6      | 0.399     | -0.593          |
| 6512 | Hematoxylin                                                                                                    | NatProd | 7        | D   | 7      | -0.557    | -0.45           |
| 6513 | Plumbagin                                                                                                      | NatProd | 7        | D   | 8      | -0.076    | 0.354           |
| 6514 | Arachidonic acid                                                                                               | NatProd | 7        | D   | 9      | -0.787    | 1.183           |
| 6515 | Farnesol, mixture of isomers                                                                                   | NatProd | 7        | D   | 10     | -0.082    | -1.181          |
| 6516 | D-Panthenol; dl-form as vitamin                                                                                | NatProd | 7        | D   | 11     | 0.556     | -0.632          |
| 6517 | ST069299                                                                                                       | NatProd | 7        | E   | 2      | -0.858    | 0.599           |
| 6518 | beta-Sitosterol                                                                                                | NatProd | 7        | E   | 3      | 0.485     | 0.171           |
| 6519 | Eugenol                                                                                                        | NatProd | 7        | E   | 4      | -0.502    | 0.412           |
| 6520 | Citronellol                                                                                                    | NatProd | 7        | E   | 5      | -0.358    | -0.277          |
| 6521 | Gentiobiose                                                                                                    | NatProd | 7        | E   | 6      | -0.848    | -0.698          |
| 6522 | Theobromine                                                                                                    | NatProd | 7        | E   | 7      | 0.305     | -0.789          |
| 6523 | 5-Methoxyflavone, 97%                                                                                          | NatProd | 7        | E   | 8      | 0.482     | 0.044           |
| 6524 | ST070084                                                                                                       | NatProd | 7        | E   | 9      | 0.921     | 1.371           |
| 6525 | Epiandrosterone                                                                                                | NatProd | 7        | E   | 10     | 0.018     | -0.927          |
| 6526 | Digoxin                                                                                                        | NatProd | 7        | E   | 11     | 0.248     | -0.148          |
| 6527 | ST069300                                                                                                       | NatProd | 7        | F   | 2      | -0.582    | 0.758           |
| 6528 | Stigmasterol                                                                                                   | NatProd | 7        | F   | 3      | 0.436     | 0.21            |
| 6529 | Nicotine                                                                                                       | NatProd | 7        | F   | 4      | -0.427    | 0.815           |
| 6530 | Linalool                                                                                                       | NatProd | 7        | F   | 5      | 0.552     | 0.024           |
| 6531 | D-Tyrosine                                                                                                     | NatProd | 7        | F   | 6      | 0.06      | -0.726          |
| 6532 | D(-)-Arginine                                                                                                  | NatProd | 7        | F   | 7      | 0.452     | -0.935          |
| 6533 | (-)-Sparteine, 99%                                                                                             | NatProd | 7        | F   | 8      | 0.583     | -0.057          |
| 6534 | 5,7-dihydroxy-3-(4-((2S,3R,4S,5S,6R)-3,4,5-trihydroxy-5-(hydroxymethyl)tetrahydro-2H-pyran-2-yl)oxy)phenyl)-4  | NatProd | 7        | F   | 9      | 0.047     | 1.045           |
| 6535 | Chrysophanic acid                                                                                              | NatProd | 7        | F   | 10     | -0.677    | 0.724           |
| 6536 | DL-a-Tocopherol acetate                                                                                        | NatProd | 7        | F   | 11     | 0.075     | 0.547           |
| 6537 | 2,3,7-trihydroxy-5-methyl-4-(methylethyl)-5-(1,2,4-trihydroxy-6-methyl-7-(methylethyl)-3-oxo[2,4,7-trihydroind | NatProd | 7        | G   | 2      | -0.544    | 0.786           |
| 6538 | L(-)-Glutathione, hydrate                                                                                      | NatProd | 7        | G   | 3      | 0.016     | -0.27           |
| 6539 | Digitonin                                                                                                      | NatProd | 7        | G   | 4      | -0.721    | -0.397          |
| 6540 | D(-)-Salicin                                                                                                   | NatProd | 7        | G   | 5      | -0.613    | -0.726          |
| 6541 | D-Camphor                                                                                                      | NatProd | 7        | G   | 6      | 0.181     | -1.33           |
| 6542 | Carminic acid                                                                                                  | NatProd | 7        | G   | 7      | -0.562    | -1.82           |
| 6543 | 2',3'-Dideoxycytidine                                                                                          | NatProd | 7        | G   | 8      | 0.338     | -0.103          |
| 6544 | 5-Methyltryptamine Hydrochloride                                                                               | NatProd | 7        | G   | 9      | -0.462    | 0.512           |
| 6545 | (-)-trans-Caryophyllene                                                                                        | NatProd | 7        | G   | 10     | -0.808    | -1.827          |
| 6546 | Linolenic acid                                                                                                 | NatProd | 7        | G   | 11     | 0.163     | -1.631          |
| 6547 | Lactulose                                                                                                      | NatProd | 8        | B   | 2      | 0.565     | 0.384           |
| 6548 | 5,7-Dihydroxy-4-propylcoumarin                                                                                 | NatProd | 8        | B   | 3      | 0.469     | -0.562          |
| 6549 | N-Acetylneuraminic acid methyl ester                                                                           | NatProd | 8        | B   | 4      | -0.275    | -0.163          |
| 6550 | DL-Leucine                                                                                                     | NatProd | 8        | B   | 5      | -0.555    | 0.406           |
| 6551 | Sennoside B                                                                                                    | NatProd | 8        | B   | 6      | 0.109     | 0.336           |
| 6552 | Neomycin B sulfate; Neomycin Trisulfate                                                                        | NatProd | 8        | B   | 7      | -0.397    | -0.372          |
| 6553 | deoxycorticosterone acetate                                                                                    | NatProd | 8        | B   | 8      | -0.536    | -0.297          |
| 6554 | hydrocortisone 21-hemisuccinate                                                                                | NatProd | 8        | B   | 9      | -0.188    | -0.985          |
| 6555 | Thyrotropin releasing hormone, protirelin, Thyroliberin, TRH, TRF                                              | NatProd | 8        | B   | 10     | 0.67      | -0.851          |
| 6556 | Adenosine 5'-triphosphate disodium salt; Adenosine Triphosphate                                                | NatProd | 8        | B   | 11     | 0.08      | -1.281          |
| 6557 | (R)-N-Acetyl-2-naphthylalanine                                                                                 | NatProd | 8        | C   | 2      | 0.464     | 0.326           |
| 6558 | Oleylamine, cis-1-Amino-9-octadecene                                                                           | NatProd | 8        | C   | 3      | -1.065    | 0.191           |
| 6559 | Ergosterol                                                                                                     | NatProd | 8        | C   | 4      | -0.043    | 0.377           |
| 6560 | D(-)-Glutamic acid                                                                                             | NatProd | 8        | C   | 5      | -0.013    | 0.822           |
| 6561 | 2-Thiouracil                                                                                                   | NatProd | 8        | C   | 6      | 0.345     | 0.527           |
| 6562 | cortisone 21-acetate                                                                                           | NatProd | 8        | C   | 7      | -0.389    | 0.026           |
| 6563 | dihydrotachysterol                                                                                             | NatProd | 8        | C   | 8      | 0.745     | -0.52           |
| 6564 | Hydrocortisone 17-butyrate                                                                                     | NatProd | 8        | C   | 9      | 0.583     | -0.604          |



SUPPLEMENTARY DATA

|      | Name                                                                                                         | Library | Plate No | Row | Column | ROS score | viability score |
|------|--------------------------------------------------------------------------------------------------------------|---------|----------|-----|--------|-----------|-----------------|
| 8565 | proscillaridin A                                                                                             | NatProd | 8        | C   | 10     | 0.255     | -0.878          |
| 8566 | (+)-alpha-Tocopherol acid succinate                                                                          | NatProd | 8        | C   | 11     | 0.106     | -1.103          |
| 8567 | 5,7-Dihydroxy-4-methylcoumarin-3-acetic acid, 991%                                                           | NatProd | 8        | D   | 2      | -0.108    | 1.281           |
| 8568 | 2-Naphthyl-beta-D-galactopyranoside                                                                          | NatProd | 8        | D   | 3      | -0.8      | 0.729           |
| 8569 | 6-(Methylthio)purine, 97%                                                                                    | NatProd | 8        | D   | 4      | 0.077     | 0.755           |
| 8570 | S-Carboxymethyl-L-cysteine                                                                                   | NatProd | 8        | D   | 5      | 0.675     | 1.185           |
| 8571 | Phylloquinone; phytonadione; Vitamin K_1                                                                     | NatProd | 8        | D   | 6      | -0.266    | 1.472           |
| 8572 | Cyproterone acetate                                                                                          | NatProd | 8        | D   | 7      | -0.334    | 0.825           |
| 8573 | estradiol valerate                                                                                           | NatProd | 8        | D   | 8      | 0.347     | 1.007           |
| 8574 | Hydrocortisone 17-valerate                                                                                   | NatProd | 8        | D   | 9      | 0.073     | -0.487          |
| 8575 | prednisolone 21-acetate                                                                                      | NatProd | 8        | D   | 10     | -0.151    | -0.728          |
| 8576 | Eriodictyol; (3',4',5,7-tetrahydroxyflavanone)                                                               | NatProd | 8        | D   | 11     | -0.39     | -0.753          |
| 8577 | 2',4-Dihydroxychalcone                                                                                       | NatProd | 8        | E   | 2      | 0.229     | 0.912           |
| 8578 | D-alpha-Tocopherol, Vitamin E                                                                                | NatProd | 8        | E   | 3      | 0.159     | 0.814           |
| 8579 | Histamine Dihydrochloride                                                                                    | NatProd | 8        | E   | 4      | -0.49     | 0.039           |
| 8580 | L(-)-Sorbitose                                                                                               | NatProd | 8        | E   | 5      | 0.194     | 1.09            |
| 8581 | Dehydrocholic acid                                                                                           | NatProd | 8        | E   | 6      | -0.133    | 1.184           |
| 8582 | Chlormadinone acetate                                                                                        | NatProd | 8        | E   | 7      | -0.799    | -0.527          |
| 8583 | beta-estradiol 17-cypionate                                                                                  | NatProd | 8        | E   | 8      | -0.398    | 0.548           |
| 8584 | 17a-Hydroxyprogesterone hexanoate                                                                            | NatProd | 8        | E   | 9      | -0.016    | 0.361           |
| 8585 | Rolifetracycline                                                                                             | NatProd | 8        | E   | 10     | -1.063    | -0.349          |
| 8586 | L-Prolinamide                                                                                                | NatProd | 8        | E   | 11     | -0.43     | -0.271          |
| 8587 | 7-Hydroxy-4-methylcoumarin-3-acetic acid, 98%                                                                | NatProd | 8        | F   | 2      | -0.702    | 0.763           |
| 8588 | DL-Thioctic acid                                                                                             | NatProd | 8        | F   | 3      | -0.539    | 0.083           |
| 8589 | 3,3',6'-Trihydroxyflavone, 97%                                                                               | NatProd | 8        | F   | 4      | 0.308     | -0.444          |
| 8590 | Spiramycin                                                                                                   | NatProd | 8        | F   | 5      | -0.397    | -0.027          |
| 8591 | Isosorbide, 98%                                                                                              | NatProd | 8        | F   | 6      | 0.141     | 0.179           |
| 8592 | clindamycin 2-phosphate                                                                                      | NatProd | 8        | F   | 7      | 0.235     | -0.829          |
| 8593 | estradiol benzoate                                                                                           | NatProd | 8        | F   | 8      | -0.054    | -0.324          |
| 8594 | Ianoside C                                                                                                   | NatProd | 8        | F   | 9      | 0.141     | -1.012          |
| 8595 | L-Aspartic Acid ; Asp; D; aminosuccinic acid; asparagic acid; asparaginic acid; (S)-aminobutanedioic acid;   | NatProd | 8        | F   | 10     | -0.332    | -0.181          |
| 8596 | Khellin                                                                                                      | NatProd | 8        | F   | 11     | 0.273     | -0.715          |
| 8597 | 3',4'-Dimethoxy-a-naphthoflavone                                                                             | NatProd | 8        | G   | 2      | 0.407     | 4.815           |
| 8598 | Di-(beta-D-xylopyranosyl)amine, disaccharide                                                                 | NatProd | 8        | G   | 3      | -0.387    | 0.048           |
| 8599 | 2-Aminoadenosine                                                                                             | NatProd | 8        | G   | 4      | -0.115    | -0.637          |
| 8600 | Josamycin                                                                                                    | NatProd | 8        | G   | 5      | -0.011    | -0.884          |
| 8601 | (-)-6beta-Hydroxymethyl-7alpha-hydroxy-cis-2-oxabicyclo[3.3.0]octan-3-one                                    | NatProd | 8        | G   | 6      | -0.282    | 0.154           |
| 8602 | dexamethasone 21-acetate                                                                                     | NatProd | 8        | G   | 7      | 0.887     | -1.782          |
| 8603 | erythromycin ethylsuccinate                                                                                  | NatProd | 8        | G   | 8      | -1.548    | -0.498          |
| 8604 | Lividomycin A sulfate salt                                                                                   | NatProd | 8        | G   | 9      | -0.487    | -1.378          |
| 8605 | (+)-Himbacine; (3S,3aR,4R,4aS,8aR,9aS)-4-((1E)-2-((2R,6S)-1,6-dimethyl-2-piperidinylethynyl)decahydro-3-meth | NatProd | 8        | G   | 10     | -0.427    | -1.777          |
| 8606 | 5-Methylcytosine hydrochloride                                                                               | NatProd | 8        | G   | 11     | -0.584    | -1.289          |
| 8607 | ST005195                                                                                                     | NatProd | 9        | B   | 2      | -0.335    | 0.857           |
| 8608 | ST012850                                                                                                     | NatProd | 9        | B   | 3      | -0.588    | 0.007           |
| 8609 | ST019371                                                                                                     | NatProd | 9        | B   | 4      | 0.287     | 0.273           |
| 8610 | ST082271                                                                                                     | NatProd | 9        | B   | 5      | 0.063     | -0.672          |
| 8611 | Adenosine 5'-succinate                                                                                       | NatProd | 9        | B   | 6      | 0.082     | 0.831           |
| 8612 | 2',3'-Dideoxythymidine                                                                                       | NatProd | 9        | B   | 7      | -0.134    | 0.238           |
| 8613 | 3-Methyluridine                                                                                              | NatProd | 9        | B   | 8      | -0.313    | 0.203           |
| 8614 | 6-Chloropurine riboside                                                                                      | NatProd | 9        | B   | 9      | -0.541    | -0.428          |
| 8615 | ST057144                                                                                                     | NatProd | 9        | B   | 10     | 0.228     | -1.888          |
| 8616 | 7-Hydroxy-3'-methoxyflavone                                                                                  | NatProd | 9        | B   | 11     | 0.116     | 0.054           |
| 8617 | ST087842                                                                                                     | NatProd | 9        | C   | 2      | -0.384    | 1.736           |
| 8618 | ST012861                                                                                                     | NatProd | 9        | C   | 3      | 0.164     | 0.182           |
| 8619 | ST023225                                                                                                     | NatProd | 9        | C   | 4      | -0.105    | 0.931           |
| 8620 | Reserpiline                                                                                                  | NatProd | 9        | C   | 5      | -0.65     | 1.473           |
| 8621 | 7-Benzoyloxytryptamine                                                                                       | NatProd | 9        | C   | 6      | 0.305     | 2.549           |
| 8622 | 2'-Deoxycytidine hydrochloride                                                                               | NatProd | 9        | C   | 7      | -0.199    | 0.945           |
| 8623 | 5-Methyl-2-thiouridine                                                                                       | NatProd | 9        | C   | 8      | -0.338    | -0.313          |
| 8624 | 5-Bromo-2'-deoxyuridine                                                                                      | NatProd | 9        | C   | 9      | -0.008    | -0.98           |
| 8625 | L-Methionine 7-amido-4-methylcoumarin trifluoroacetate salt                                                  | NatProd | 9        | C   | 10     | -0.107    | -0.623          |
| 8626 | 3'-Iodo-5'-deoxyadenosine                                                                                    | NatProd | 9        | C   | 11     | 0.245     | -1.473          |
| 8627 | ST009819                                                                                                     | NatProd | 9        | D   | 2      | -0.388    | 1.867           |
| 8628 | ST012862                                                                                                     | NatProd | 9        | D   | 3      | -0.444    | 0.12            |
| 8629 | Coumarin                                                                                                     | NatProd | 9        | D   | 4      | 0.381     | 0.919           |
| 8630 | ST031709                                                                                                     | NatProd | 9        | D   | 5      | 0.223     | 1.375           |
| 8631 | N-Methylserotonin oxalate                                                                                    | NatProd | 9        | D   | 6      | 0.071     | 2.438           |
| 8632 | 5-Aminouridine hydrochloride                                                                                 | NatProd | 9        | D   | 7      | 0.272     | 0.784           |
| 8633 | 5-Fluorouridine, FURd                                                                                        | NatProd | 9        | D   | 8      | 0.234     | 0.327           |
| 8634 | Xylure                                                                                                       | NatProd | 9        | D   | 9      | -0.393    | 0.899           |
| 8635 | URB [5,6-Dichloro-1-b-D-ribofuranosyl]benzimidazole)                                                         | NatProd | 9        | D   | 10     | 0.241     | 0.305           |
| 8636 | N-alpha-(tert-Butoxycarbonyl)-L-histidine                                                                    | NatProd | 9        | D   | 11     | 0.187     | -2.25           |
| 8637 | Peganine                                                                                                     | NatProd | 9        | E   | 2      | 0.26      | 0.218           |
| 8638 | ST012863                                                                                                     | NatProd | 9        | E   | 3      | -0.149    | 0.388           |
| 8639 | Ephedrine                                                                                                    | NatProd | 9        | E   | 4      | -0.824    | 0.303           |
| 8640 | ST038949                                                                                                     | NatProd | 9        | E   | 5      | -0.326    | 0.053           |
| 8641 | 2'-Deoxyadenosine monohydrate                                                                                | NatProd | 9        | E   | 6      | 0.083     | 0.98            |
| 8642 | (E)-5-(2-Bromovinyl)-2'-deoxyuridine                                                                         | NatProd | 9        | E   | 7      | -0.172    | -0.631          |
| 8643 | Adenosine 5'-diphosphate, disodium salt hydrate                                                              | NatProd | 9        | E   | 8      | 0.175     | 0.387           |
| 8644 | ST057124                                                                                                     | NatProd | 9        | E   | 9      | 0.568     | -1.178          |
| 8645 | Ethanone, 2-(3-hydroxy-4-methoxyphenyl)-1-(2,4,6-trihydroxyphenyl)-                                          | NatProd | 9        | E   | 10     | -0.236    | -0.665          |
| 8646 | 3',6-Dimethylflavone                                                                                         | NatProd | 9        | E   | 11     | 0.124     | -1.103          |
| 8647 | ST012842                                                                                                     | NatProd | 9        | F   | 2      | -0.017    | -0.007          |
| 8648 | ST012920                                                                                                     | NatProd | 9        | F   | 3      | -0.579    | -0.902          |
| 8649 | Peracetate Quercetin                                                                                         | NatProd | 9        | F   | 4      | 0.248     | 0.725           |
| 8650 | 6-Hydroxy-4-methyl-2-benzopyrone                                                                             | NatProd | 9        | F   | 5      | -0.651    | -0.085          |
| 8651 | 3-HYDROXY-3',4'-DIMETHOXYFLAVONE                                                                             | NatProd | 9        | F   | 6      | 0.357     | -0.351          |
| 8652 | 5,6-Dihydrothymidine                                                                                         | NatProd | 9        | F   | 7      | 0.085     | -0.284          |
| 8653 | 5-Bromouridine                                                                                               | NatProd | 9        | F   | 8      | -0.447    | 0.489           |
| 8654 | N-Allyladenosine                                                                                             | NatProd | 9        | F   | 9      | -0.336    | -0.439          |
| 8655 | 2',6-Dihydroxyflavanone                                                                                      | NatProd | 9        | F   | 10     | -0.443    | 0.323           |
| 8656 | 2-(2-amino-3-imidazol-5-ylpropanoylamino)-3-hydroxypropanoic acid                                            | NatProd | 9        | F   | 11     | -0.464    | -1.615          |
| 8657 | ST012844                                                                                                     | NatProd | 9        | G   | 2      | 0.122     | -0.323          |
| 8658 | ST012942                                                                                                     | NatProd | 9        | G   | 3      | 0.135     | -0.379          |
| 8659 | Peracetate Rutine                                                                                            | NatProd | 9        | G   | 4      | 0.04      | -0.494          |
| 8660 | ST051518                                                                                                     | NatProd | 9        | G   | 5      | -0.082    | -1.303          |
| 8661 | ST056912                                                                                                     | NatProd | 9        | G   | 6      | -0.277    | 0.879           |
| 8662 | 2'-O-Methylcytidine                                                                                          | NatProd | 9        | G   | 7      | -0.13     | -0.879          |
| 8663 | 2-Amino-6-chloropurine-9-riboside                                                                            | NatProd | 9        | G   | 8      | -0.184    | -0.615          |
| 8664 | ST057127                                                                                                     | NatProd | 9        | G   | 9      | -0.113    | -0.892          |
| 8665 | 5,7-Dimethoxyflavanone                                                                                       | NatProd | 9        | G   | 10     | -0.111    | -1.023          |
| 8666 | 2',6-Dihydroxyflavone                                                                                        | NatProd | 9        | G   | 11     | -0.329    | -1.499          |
| 8667 | 5,7-Dimethoxy-4-methylcoumarin                                                                               | NatProd | 10       | B   | 2      | -0.826    | 0.723           |
| 8668 | L(-)-Histidinol dihydrochloride                                                                              | NatProd | 10       | B   | 3      | 0.008     | 0.949           |
| 8669 | 6-Fluorochromone-3-carboxylic acid                                                                           | NatProd | 10       | B   | 4      | -0.825    | -0.129          |

SUPPLEMENTARY DATA

|      | Name                                                                                    | Library | Plate No | Row | Column | ROS score | viability score |
|------|-----------------------------------------------------------------------------------------|---------|----------|-----|--------|-----------|-----------------|
| 8670 | 6-methoxy-2-oxo-2H-chromen-7-yl                                                         | NatProd | 10       | B   | 5      | -0.128    | 0.555           |
| 8671 | Pectolarin                                                                              | NatProd | 10       | B   | 6      | -0.551    | -0.044          |
| 8672 | Haplophine, gamma-Fagarine                                                              | NatProd | 10       | B   | 7      | -0.43     | 0.337           |
| 8673 | Haploperoside C Acetate                                                                 | NatProd | 10       | B   | 8      | -0.478    | 0.863           |
| 8674 | 3',7-Dimethoxy-3-hydroxyflavone                                                         | NatProd | 10       | B   | 9      | 0.084     | -0.252          |
| 8675 | Esculetin                                                                               | NatProd | 10       | B   | 10     | -0.57     | -0.785          |
| 8676 | Nalpha-FMOC-L-Tryptophan                                                                | NatProd | 10       | B   | 11     | -0.726    | -0.513          |
| 8677 | 2',3'-Dideoxyadenosine                                                                  | NatProd | 10       | C   | 2      | -0.194    | 0.368           |
| 8678 | Sinapyl Alcohol                                                                         | NatProd | 10       | C   | 3      | -0.082    | 0.836           |
| 8679 | 3(2'-Chlorophenyl)-7-ethoxycoumarin                                                     | NatProd | 10       | C   | 4      | -0.233    | 0.229           |
| 8680 | Haploperoside                                                                           | NatProd | 10       | C   | 5      | 0.432     | -0.272          |
| 8681 | ST077103                                                                                | NatProd | 10       | C   | 6      | 0.019     | 0.522           |
| 8682 | Amorphigenine Hydrochloride                                                             | NatProd | 10       | C   | 7      | 1.583     | -6.433          |
| 8683 | Haploperoside D Acetate                                                                 | NatProd | 10       | C   | 8      | 0.031     | 1.834           |
| 8684 | Flavin adenine dinucleotide disodium salt                                               | NatProd | 10       | C   | 9      | 0.398     | 0.125           |
| 8685 | Piperine, Bioperine                                                                     | NatProd | 10       | C   | 10     | 0.161     | -0.384          |
| 8686 | Genipin                                                                                 | NatProd | 10       | C   | 11     | 0.122     | -0.98           |
| 8687 | Xanthoxol geranyl ether                                                                 | NatProd | 10       | D   | 2      | -0.122    | 1.057           |
| 8688 | ST070080                                                                                | NatProd | 10       | D   | 3      | -0.124    | 0.568           |
| 8689 | ST073517                                                                                | NatProd | 10       | D   | 4      | -0.226    | 0.177           |
| 8690 | Obtusidin                                                                               | NatProd | 10       | D   | 5      | -0.224    | -0.255          |
| 8691 | Frutin 3''-p-coumarate, 5,7,4'-Trihydroxyflavanone 7-O-glucoside-3''-p-coumarate        | NatProd | 10       | D   | 6      | -0.359    | 0.069           |
| 8692 | ST077125                                                                                | NatProd | 10       | D   | 7      | 0.188     | 0.621           |
| 8693 | Demethoxycentaureidin 7-O-rutinoside                                                    | NatProd | 10       | D   | 8      | 0.015     | 0.191           |
| 8694 | 5'-Deoxythymidine                                                                       | NatProd | 10       | D   | 9      | 0.4       | -0.25           |
| 8695 | L-Cysteic acid monohydrate                                                              | NatProd | 10       | D   | 10     | 0.593     | 0.026           |
| 8696 | 6-Ethoxy-3(4'-hydroxyphenyl)-4-methylcoumarin                                           | NatProd | 10       | D   | 11     | -0.041    | -0.894          |
| 8697 | 5-Methoxyflavanone                                                                      | NatProd | 10       | E   | 2      | -0.052    | 0.668           |
| 8698 | 5-Nitrooctic acid, potassium salt monohydrate                                           | NatProd | 10       | E   | 3      | -0.22     | 0.521           |
| 8699 | Kinetin hydrochloride                                                                   | NatProd | 10       | E   | 4      | 0.193     | -0.171          |
| 8700 | Chrysoeriol, 5,7-dihydroxy-2-(4-hydroxy-3-methoxyphenyl)-4H-1-Benzopyran-4-one          | NatProd | 10       | E   | 5      | 0.447     | -0.177          |
| 8701 | Limocitrin                                                                              | NatProd | 10       | E   | 6      | -0.148    | 0.368           |
| 8702 | Aloe-Emodin-8-O-glycoside                                                               | NatProd | 10       | E   | 7      | 0.904     | 0.225           |
| 8703 | Liquiritin                                                                              | NatProd | 10       | E   | 8      | -0.261    | -0.211          |
| 8704 | Uridine 5'-triphosphate trisodium salt hydrate                                          | NatProd | 10       | E   | 9      | 0.049     | -0.413          |
| 8705 | 4,6-Dimethyl-3(4'-hydroxyphenyl)coumarin                                                | NatProd | 10       | E   | 10     | -0.027    | -0.265          |
| 8706 | 3(2',4'-Dichlorophenyl)-4-phenylcoumarin                                                | NatProd | 10       | E   | 11     | -0.148    | -0.372          |
| 8707 | 6-Bromo-3'-methylflavone                                                                | NatProd | 10       | F   | 2      | 0.033     | 1.28            |
| 8708 | 6-Fluoro-DL-tryptophan                                                                  | NatProd | 10       | F   | 3      | 0.126     | 0.257           |
| 8709 | L-Thiocitrulline                                                                        | NatProd | 10       | F   | 4      | 0.249     | 0.405           |
| 8710 | 5-hydroxy-2-(4-hydroxy-3-methoxyphenyl)-4-oxo-4H-chromen-7-yl hexopyranoside            | NatProd | 10       | F   | 5      | -0.053    | 0.21            |
| 8711 | Haploside D                                                                             | NatProd | 10       | F   | 6      | -0.085    | -0.068          |
| 8712 | Genistein-7-O-Glc-Xyl, Acetate                                                          | NatProd | 10       | F   | 7      | -0.229    | 0.923           |
| 8713 | ST077838                                                                                | NatProd | 10       | F   | 8      | 0.026     | 0.214           |
| 8714 | Thymidine 5'-triphosphate sodium salt                                                   | NatProd | 10       | F   | 9      | -0.388    | -0.01           |
| 8715 | 4'-hydroxyflavanone                                                                     | NatProd | 10       | F   | 10     | -0.144    | -0.024          |
| 8716 | 3(2'-Chlorophenyl)-7-hydroxy-4-phenylcoumarin, 98%                                      | NatProd | 10       | F   | 11     | 0.588     | 0.333           |
| 8717 | 4',7-Dimethoxy-3-hydroxyflavone                                                         | NatProd | 10       | G   | 2      | -0.36     | -0.227          |
| 8718 | 3(4'-Chlorophenyl)-4,6-dimethylcoumarin                                                 | NatProd | 10       | G   | 3      | -0.285    | 0.48            |
| 8719 | Haploperoside, 6-methoxy-2-oxo-2H-chromen-7-yl 6-O-(6-deoxyhexopyranosyl)hexopyranoside | NatProd | 10       | G   | 4      | -0.349    | -0.265          |
| 8720 | Thempopsoid, crotonoyl                                                                  | NatProd | 10       | G   | 5      | -0.134    | -0.308          |
| 8721 | Justicidin B; 9-(1,3-benzodioxol-5-yl)-6,7-dimethoxynaphtho[2,3-c]furan-1(3H)-one       | NatProd | 10       | G   | 6      | 0.308     | -0.644          |
| 8722 | Orobole 7-O-Glucoside, Acetate                                                          | NatProd | 10       | G   | 7      | 0.052     | -0.148          |
| 8723 | 3,7-Dihydroxy-3',4'-dimethoxyflavone, Fisetin-3',4'-dimethyl ether                      | NatProd | 10       | G   | 8      | -0.173    | -0.195          |
| 8724 | 3-(2-Naphthyl)-D-alanine                                                                | NatProd | 10       | G   | 9      | -0.596    | 0.094           |
| 8725 | 6-Bromo-2-naphthyl-beta-D-galactopyranoside                                             | NatProd | 10       | G   | 10     | -0.077    | -0.749          |
| 8726 | 4',7-Dihydroxyflavone                                                                   | NatProd | 10       | G   | 11     | -0.123    | -0.541          |
| 8727 | 11-alpha-Acetoxyprogesterone                                                            | NatProd | 11       | B   | 2      | -1.129    | 0.837           |
| 8728 | 3,4,6-Tri-O-acetyl-D-galactal                                                           | NatProd | 11       | B   | 3      | -0.37     | -0.646          |
| 8729 | 2',7-Dimethoxyflavone                                                                   | NatProd | 11       | B   | 4      | 0.336     | 0.017           |
| 8730 | 5-Methylcytidine                                                                        | NatProd | 11       | B   | 5      | 0.035     | 0.285           |
| 8731 | 8-Chloro-1-tetrahydronorharmanone                                                       | NatProd | 11       | B   | 6      | -0.588    | 0.48            |
| 8732 | 4'-Hydroxy-5,7-dimethoxyflavanone                                                       | NatProd | 11       | B   | 7      | -0.581    | -1.483          |
| 8733 | Urocanic acid                                                                           | NatProd | 11       | B   | 8      | 0.521     | -0.119          |
| 8734 | 3,5-Dihydroxyflavone                                                                    | NatProd | 11       | C   | 2      | -0.241    | 1.088           |
| 8735 | Rubone; 2'-Hydroxy-2,4,4',5,6'-pentamethoxychalcone                                     | NatProd | 11       | C   | 3      | -0.328    | -0.872          |
| 8736 | 4-Hydroxy-2,3,4',6'-tetramethoxychalcone                                                | NatProd | 11       | C   | 4      | 0.406     | 0.405           |
| 8737 | Ipriflavone                                                                             | NatProd | 11       | C   | 5      | -0.02     | -0.357          |
| 8738 | (S)-(-)-Perillic acid                                                                   | NatProd | 11       | C   | 6      | -0.284    | -0.702          |
| 8739 | 3-Hydroxy-3',4',5'-trimethoxyflavone                                                    | NatProd | 11       | C   | 7      | -0.143    | -0.532          |
| 8740 | N-3-Benzoyl-L-arginine                                                                  | NatProd | 11       | C   | 8      | 0.635     | -1.311          |
| 8741 | 1,3-dimethyluronic acid                                                                 | NatProd | 11       | D   | 2      | -0.759    | 0.072           |
| 8742 | 3,4,2',4',6'-Pentamethoxychalcone                                                       | NatProd | 11       | D   | 3      | 0.433     | 1.241           |
| 8743 | Coumarin 338                                                                            | NatProd | 11       | D   | 4      | -0.393    | 0.881           |
| 8744 | Vitexin-2''-rhamnoside ; 2-O-Rhamnosylvitexin                                           | NatProd | 11       | D   | 5      | -0.237    | -0.137          |
| 8745 | Ureidosuccinic acid; Carbamoyl-dl-aspartic acid                                         | NatProd | 11       | D   | 6      | 0.203     | 0.251           |
| 8746 | Robinetin trimethyl ether                                                               | NatProd | 11       | D   | 7      | -0.074    | 0.429           |
| 8747 | ST086270                                                                                | NatProd | 11       | D   | 8      | -0.12     | -0.628          |
| 8748 | L-Histidine beta-naphthylamide                                                          | NatProd | 11       | E   | 2      | -0.335    | 0.626           |
| 8749 | 5-Hydroxy-3'-methoxyflavone                                                             | NatProd | 11       | E   | 3      | 1.052     | 0.453           |
| 8750 | Coumarin 106                                                                            | NatProd | 11       | E   | 4      | -0.739    | 3.684           |
| 8751 | (-)-Eseroline fumarate                                                                  | NatProd | 11       | E   | 5      | -0.592    | 0.167           |
| 8752 | 1-Methylhistamine dihydrochloride                                                       | NatProd | 11       | E   | 6      | 0.056     | -0.502          |
| 8753 | Ouabain octahydrate, G-Strophantin octahydrate                                          | NatProd | 11       | E   | 7      | 0.298     | 0.334           |
| 8754 | Levodopa, 3,4-Dihydroxy-L-phenylalanine, L-3-Hydroxytyrosine, L-DOPA                    | NatProd | 11       | E   | 8      | 0.069     | 0.412           |
| 8755 | 3,4-Di-O-acetyl-6-deoxy-L-glucal                                                        | NatProd | 11       | F   | 2      | -0.127    | 0.504           |
| 8756 | 2',5-Dimethoxyflavone                                                                   | NatProd | 11       | F   | 3      | -0.159    | -0.581          |
| 8757 | O2'-Cyclouridine                                                                        | NatProd | 11       | F   | 4      | -0.543    | -0.085          |
| 8758 | N2-Isobutyril-2'-deoxyguanosine                                                         | NatProd | 11       | F   | 5      | 0.196     | -0.775          |
| 8759 | Carbobenzoxy-L-asparagine, Nalpha-Carbobenzoxy-L-asparagine                             | NatProd | 11       | F   | 6      | -0.717    | 1.087           |
| 8760 | Icamin                                                                                  | NatProd | 11       | F   | 7      | 0.17      | 0.381           |
| 8761 | 7-Benzoyloxygramine                                                                     | NatProd | 11       | G   | 2      | -0.639    | 0.181           |
| 8762 | 4',6-Dimethoxyflavone                                                                   | NatProd | 11       | G   | 3      | -0.026    | -1.488          |
| 8763 | N4-Anisoyl-2'-deoxycytidine                                                             | NatProd | 11       | G   | 4      | -0.108    | -0.806          |
| 8764 | N2-Isobutyril-5'-O-(4,4'-dimethoxytrityl)-2'-deoxyguanosine                             | NatProd | 11       | G   | 5      | 0.771     | -0.908          |
| 8765 | Kaempferide, 4'-methoxy-3,5,7-trihydroxyflavone                                         | NatProd | 11       | G   | 6      | -0.249    | -1.688          |
| 8766 | Lycorine hydrochloride                                                                  | NatProd | 11       | G   | 7      | 0.217     | 0.116           |
